# Supplementary material
Source: ML conference proceedings conference paper supplement (https://aclanthology.org/2025.wacl-1.11)
Supplement: OptionalSupplementaryMaterial [file 2025.wacl-1.11.OptionalSupplementaryMaterial.zip]

## Sheet: Sheet1
CAI	MSA	validated Cairo Dialect Translation
امتى بيفتح مكتب البريد؟	متى يفتح مكتب البريد ؟	امتى بيفتح مكتب البريد؟
ممكن تأكد حجز رحلتي على يوم اتناشر أكتوبر؟	هل يمكنكم التأكيد علي حجزي لرحلة الطيران يوم الثاني عشر من أكتوبر ؟	ممكن تأكد حجز رحلتي على يوم اتناشر أكتوبر؟
عندنا تذاكر لعربيات عادية و عربيات صديقة للبيئة. تحب ايه فيهم؟	لدينا تذاكر للسيارات العادية وسيارات جرين كارز . أيهما تبغي ؟	عندنا تذاكر لعربيات عادية وعربيات صديقة للبيئة. تحب ايه فيهم؟
اية الوداها هناك؟	ما الذي ذهب بها إلى هناك ؟	اية الوداها هناك؟
ممنوع تدخله البلد - آسف. أه، أعتقد ده كدة كل حاجة.	دخوله البلد مخالف للقانون . آسف . حسناً , إنني أخمن في كيفية العناية بكل شيء .	ممنوع تدخله البلد - آسف. أه، أعتقد ده كدة كل حاجة.
الجولة هاتبدأ منين؟	أين تبدأ هذه الجولة ؟	الجولة هاتبدأ منين؟
انت دفعت فاتورة الفندق؟	هل دفعت فاتورة إقامتك في الفندق ؟	انت دفعت فاتورة الفندق؟
انا عايزة اجيب شويت حاجات عشان اعمل ماسك للوش.	أود الحصول على مادة لعمل " مَاسْك " للوجه .	انا عايزة اجيب شويت حاجات عشان اعمل ماسك للوش.
امشي لاخر القاعة دي وادخل شمال من عند الكورنر. هتلاقيه على يمينك.	سر للأمام إلى آخر هذه القاعة وانعطف يسارا عند الركن . سوف تجدها على يمينك .	امشي لاخر القاعة دي وادخل شمال من عند الكورنر. هتلاقيه على يمينك.
لو سمحت. ممكن أسألك سؤال؟	معذرة . هل يمكن أن أسألك سؤالا ؟	لو سمحت. ممكن أسألك سؤال؟
إمشي على طول في الشارع حوالي خمس تقاطعات، في صيدلية على الناصية. لما توصل ادخل اول يمين. هاتلاقيها على شمالك.	قم بالسير للأمام في هذا الشارع حوالي لمسافة خمسة بلوكات تقريبا ستجد هناك على الناصية أحد الصيدليات . عندما تصل إلى هناك اتجه إلى اليمين . ستجدها تماما على يسارك .	إمشي على طول في الشارع حوالي خمس تقاطعات، في صيدلية على الناصية. لما توصل ادخل اول يمين. هاتلاقيها على شمالك.
السكرانين كلهم واحد في أي بلد.	السكارى هم أنفسهم في كل بلد .	السكرانين كلهم واحد في أي بلد.
أعذرني . ممكن تفول العربية بنزين عادي، من فضلك؟	عذراً . هل يمكن أن تملأها بانتظام ، من فضلك ؟	أعذرني . ممكن تفول العربية بنزين عادي، من فضلك؟
بتحب الاكل الياباني اكتر, مش كده؟	هل تحب الطعام الياباني أكثر كذلك ؟	بتحب الاكل الياباني اكتر, مش كده؟
عايز أمد اقامتي هنا يومين كمان.	أريد مد إقامتي هنا ليومين آخرين .	عايز أمد اقامتي هنا يومين كمان.
ايه هي ساعات عمل المحل؟	ما هي أوقات عمل المخازن ؟	ايه هي ساعات عمل المحل؟
دلوقتي الساعة تسعة .	الساعة التاسعة .	دلوقتي الساعة تسعة.
اديني وقت عشان أقلبها في دماغي .	اعطني وقتاً كي أفكر في الأمر .	اديني وقت عشان أقلبها في دماغي.
مكن آخد جدول مواعيد، لو سمحت؟	أيمكنني الحصول على جدول زمني ، من فضلك ؟	مكن آخد جدول مواعيد، لو سمحت؟
اتنين واحد اتنين تلاته اربعه تمانية تلاته تلاته الف .	اثنان واحد اثنان ثلاثة أربعة ثمانية ثلاثة ثلاثة ألف .	اتنين واحد اتنين تلاته اربعه تمانية تلاته تلاته الف.
ضيقة اوي من عند الصدر .	إنه ضيق جداً من عند الصدر .	ضيقة اوي من فوق
اه، تمام . اتفضل هنا .	أوه . نعم . تفضل .	اه، تمام . اتفضل هنا.
فين و هترجع بعد قد إيه؟	أين وحوالي متي ستعود ثانية ؟	فين و هترجع بعد قد إيه؟
في رأيي نظام التوظيف مدى الحياة كويس ووحش.	في رأي أن نظام التوظيف طيلة العمل جيد وسيئ في نفس الوقت .	في رأيي نظام التوظيف مدى الحياة كويس ووحش.
هنبعتلك بالبريد عشرين عينة اضافية.	سنبعث لك بالبريد عشرين عينة إضافية .	هنبعتلك بالبريد عشرين عينة اضافية.
عايز أأجر لوح تزلج شراعي .	أود استئجار لوح شراعي .	عايز أأجر لوح تزلج شراعي.
متهيألي الوقت بيروح مننا .	أعتقد أن وقتنا ينفد .	متهيألي الوقت بيروح مننا.
اه، حرارتك عالية. معدتك عاملة ايه؟	آه , إن عندك حرارة مرتفعة . كيف حال معدتك ؟	اه، حرارتك عالية. معدتك عاملة ايه؟
آه، إتصلت من شوية.	أجل ، لقد اتصلت منذ وقت قصير .	آه، إتصلت من شوية.
تعرف مكان بنك او ماكينة ماكينات صرف الي قريبه من هنا؟	هل تعلم بوجود بنوك أو أجهزة صرف آلي بالقرب من هنا .	تعرف مكان بنك او ماكينة ماكينات صرف الي قريبه من هنا؟
مكانه فين؟	أين يقع ؟	مكانه فين؟
المحل بيفتح إمتى؟	متى يفتح المتجر ؟	المحل بيفتح إمتى؟
انت شايف اليافطة بتاعت المترو هناك	أنت تري علامة المترو هناك .	انت شايف اليافطة بتاعت المترو هناك.
احسنلك تبطل اللي بتعملوا ده	الأجدر بك أن تكف عن ذلك .	احسنلك تبطل اللي بتعملوا ده.
معاية ستاشر دولارا تمن نوع ممتاز مافيهوش رصاص .	معي ستة عشر دولاراً ثمن نوع ممتاز خالي من الرصاص .	معاية ستاشر دولارا تمن نوع ممتاز مافيهوش رصاص.
حتاخد عالاقل تسعة و تسعين ساعة .	سآخذ على الأقل تسعة وتسعين ساعة .	حتاخد عالاقل تسعة و تسعين ساعة.
انا خايف أكون سبت حاجتي في الطيارة.	أخشى أني قد تركت أشيائي في الطائرة .	انا خايف أكون سبت حاجتي في الطيارة.
ماتضربش نار .	لا تطلق النار .	ماتضربش نار.
عايز شريط اله كاتبه .	أود شريطاً للآلة الكاتبة .	عايز شريط اله كاتبه.
هو الطريق ده.	إنه ذلك الطريق .	هو الطريق ده.
دي كلها حاجات مطبوعة.	هذه كلها مطبوعات .	دي كلها حاجات مطبوعة.
هننزل إمتى؟	متى سوف نهبط ؟	هننزل إمتى؟
حاخد حتة.	سآخذ شريحة .	حاخد حتة.
ممكن تستناني هنا؟ أنا هاجي خلال كام دقيقة.	هلا انتظرتني هنا ؟ سأعود بعد بضعة دقائق .	ممكن تستناني هنا؟ أنا هاجي خلال كام دقيقة.
من فضلك عايز امد حجزي للغرفة، اربعه و عشرين ساعه كمان.	أريد الامتداد أربع وعشرون ، من فضلك .	من فضلك عايز امد حجزي للغرفة، اربعه و عشرين ساعه كمان.
عندك أي كوكتيلات مميزة؟	هل لديكم أي أنواع خاصة من الكوكتيل ؟	عندك أي كوكتيلات مميزة؟
لأ، ممكن تجيبه من الصيدلية.	لا , يمكنك الحصول عليها في مخزن الأدوية .	لأ، ممكن تجيبه من الصيدلية.
هو أنا محتاج فكة بسعر تذكرة للأتوبيس بالضبط	هل من الضروري تقديم فكة بقيمة تذكرة الحافلة بالضبط ؟	هو أنا محتاج فكة بسعر تذكرة للأتوبيس بالضبط.
إمتى ممكن استلم الصور؟	متى يمكنني استلام الصور .	إمتى ممكن استلم الصور؟
أكيد. إنزل السلالم هناك وهتشوف اليافطة بتاعت الإتجاهات إمشي زي مابتقول.	بالتأكيد ، انزل من على الدرج هناك وسوف تجد بعض الإرشادات فاتبعها من فضلك .	أكيد. إنزل السلالم هناك وهتشوف اليافطة بتاعت الإتجاهات إمشي زي مابتقول.
انا فصل عندي. ممكن توصلني تاني؟	لقد قطع الخط . هل يمكنك إعادة الخط لي ؟	انا فصل عندي. ممكن توصلني تاني؟
ليه رحت نيويورك السنه اللي فاتت؟	لماذا قصدت نيويورك في العام الماضي ؟	ليه رحت نيويورك السنة اللي فاتت؟
عندك أي عربيات صغيرة؟	هل لديكم أية اسطوانات مصغرة ؟	عندك أي عربيات صغيرة؟
ممكن إذا سمحت تحط شنطك عالطرابيزة؟	هل لك أن تضع حقائبك علي الطاولة من فضلك ؟	ممكن إذا سمحت تحط شنطك عالطرابيزة؟
ده حيكون عظيم خالص لو عرفو كل ده عن اليابان .	سيكون رائعا إذا عرفوا كل هذا عن اليابان .	ده حيكون عظيم خالص لو عرفوا كل ده عن اليابان.
فين مكتب الرحلات الغير مباشرة؟	أين مكتب الطيران الذي سأواصل عليه الرحلة ؟	فين مكتب الرحلات الغير مباشرة؟
باحب أشوف برامج الرياضية في التليفزيون.	يروقني مشاهدة برامج الرياضة على شاشة التليفزيون .	باحب أشوف برامج الرياضية في التليفزيون.
رقم البوابه كام؟	ما رقم البوابة ؟	رقم البوابه كام؟
عايز اعادي على نيويورك وانا رايح تورونتو.	أريد أن أمر بنيويورك في طريقي إلى تورونتو .	عايز اعادي على نيويورك وانا رايح تورونتو.
ايوة، حاخد ويسكي و صودا مع المقبلات .	نعم ، سآخذ ويسكي و صودا مع المقبلات .	ايوة، حاخد ويسكي و صودا مع المقبلات.
من فضلك بسرعة.	من فضلك ، أسرع .	من فضلك بسرعة.
كان لازم ابعتهم بالبريد الجوي .	كان يجب علىّ إرسالها بالبريد الجوي .	كان لازم ابعتهم بالبريد الجوي.
اقدر أوصل في الميعاد لو مشيت دلوقتي؟	هل يمكنني أن أذهب هناك في الميعاد إذا غادرت من هنا الآن .	اقدر أوصل في الميعاد لو مشيت دلوقتي؟
خمس عشرينات و اربع خمسينات .	خمسة فئة عشرين وأربعة فئة خمسين .	خمس عشرينات و اربع خمسينات.
حاضر، يا فندم . ما فيش مشاكل يعدي فيلم الكاميرا من خلالها؟	حسنا ، يا سيدي . هل من الأمان تشغيل هذا الفيلم ؟	حاضر، يا فندم . ما فيش مشاكل يعدي فيلم الكاميرا من خلالها؟
حط لوسيون على شعري، من فضلك .	ضع بعض اللوسيون على شعري ، من فضلك .	حط لوسيون على شعري، من فضلك.
هو ده صوف نقي ؟	إنه صوف نقى ؟	هو ده صوف نقي؟
أنا من السويد.	إنني من السويد .	أنا من السويد.
عندك صندوق امانات؟	هل لديكم صندوق إيداع ؟	عندك صندوق امانات؟
هو ممكن بس تديني علاج مؤقت يا دكتور؟	أيمكنك إعطاؤه علاجاً مؤقتا . أيها الطبيب ؟	هو ممكن بس تديني علاج مؤقت يا دكتور؟
آه، أقف هنا، من فضلك.	أجل ، توقف في ذلك المكان من فضلك .	آه، أقف هنا، من فضلك.
أمشي علطول، من فضلك .	سر مباشرة ، من فضلك .	أمشي علطول، من فضلك.
عايز ساعة مستعملة.	أريد ساعة مستعملة .	عايز ساعة مستعملة.
إشارة المرور دي معناها إيه؟	ما معنى علامة المرور هذه ؟	إشارة المرور دي معناها إيه؟
هو في محل لعب أطفال قريب من هنا؟	هل يوجد محل لعب أطفال بالقرب من هنا ؟	هو في محل لعب أطفال قريب من هنا؟
ممكن تملا الاستمارة دي وتبعتهاله تاني بالفاكس؟	استوف بيانات هذه الاستمارة من فضلك ثم أعدها بالفاكس إليه .	ممكن تملا الاستمارة دي وتبعتهاله تاني بالفاكس؟
ممكن تكتب التقرير بدالي؟	هل ستكتب التقرير لي ؟	ممكن تكتب التقرير بدالي؟
خلينا نشهل، و الا هنتأخر .	هيا نسرع ، وإلا سنتأخر .	خلينا نشهل، و الا هنتأخر.
لأ، شكرا . احسنلي ما اشربش تاني .	لا ، شكراً . من الأفضل أن لا أشرب المزيد .	لأ، شكرا . احسنلي ما اشربش تاني.
ايوه، عندي .	نعم لدي .	ايوه، عندي.
ممكن لو سمحت تغير ده؟	هل يمكنك تبديل هذه ؟	ممكن لو سمحت تغير ده؟
حوالي ساعة و نص .	حوالي ساعة ونصف .	حوالي ساعة و نص.
معلش، بس ده قصير.	معذرة ، ولكن هذا قصير .	معلش، بس ده قصير.
أنا عندي سخونة.	حرارتي مرتفعة .	أنا عندي سخونة.
فين بقيت الناس؟	أين الأشخاص الآخرين ؟	فين بقيت الناس؟
هأفكر في الموضوع ده تاني .	سأفكر في الأمر .	هأفكر في الموضوع ده تاني.
انت بتعمل ايه؟	ماذا تفعل ؟	انت بتعمل ايه؟
أهلا، الظاهر إننا جيران.	أهلا ، نحن جيران على ما يبدو .	أهلا، الظاهر إننا جيران.
عندك واحد أزرق؟	هل لديك واحداً أزرق ؟	عندك واحد أزرق؟
لو سمحت قولي استعملها أزاي.	من فضلك أخبرني كيف استخدمها .	لو سمحت قولي استعملها أزاي.
في أى حد هنا في المحل بيعرف يتكلم ياباني؟	هل يوجد أي شخص يتحدث اليابانية في المتجر ؟	في أى حد هنا في المحل بيعرف يتكلم ياباني؟
تاريخ الانتهاء مارس الف تسعميه و تسعه و تسعين .	تاريخ الانتهاء تسعة عشر من مارس تسعة وتسعين .	تاريخ الانتهاء مارس الف تسعميه و تسعه و تسعين.
ممكن شويت مكسرات، لو سمحت.	اعطني بعض المكسرات , من فضلك .	ممكن شويت مكسرات، لو سمحت.
ممكن علبتين هدايا عشان دول؟	هل لي بصندوقي هدايا لهؤلاء ؟	ممكن علبتين هدايا عشان دول؟
هاقعد في فندق، بس أنا محجزتش لسه.	سأقيم في فندق ، ولكني لم أحجز بعد .	هاقعد في فندق، بس أنا محجزتش لسه.
لوسمحت . ممكن تدلني على الطريق لمحطة القطر، من فضلك؟	عفواً . هلا أرشدتني إلى طريق محطة السكة الحديد ، من فضلك ؟	لوسمحت . ممكن تدلني على الطريق لمحطة القطر، من فضلك؟
لو سمحت إختار نبيت كويس مع الأكل بتاعنا.	من فضلك اختر نبيذاً جيداً لوجبتنا .	لو سمحت إختار نبيت كويس مع الأكل بتاعنا.
اديهاني . ده كل اللي عندك؟	سلّمها ، هل هذا كل ما لديك ؟	اديهاني . ده كل اللي عندك؟
تذكرة طلبة، لو سمحت .	تذكرة لطالب واحد , من فضلك .	تذكرة طلبة، لو سمحت.
عليك انك تجرب فندق اتش او فندق سي .	ربما عليك أن تجرب فندق " إتش " أو " سي " .	يمكن تجرب فندق "إتش" أو "سي".
ممكن تديني ضوء لما تكون فيه؟	هل لك أن تعطيني إشارة بالضوء عندما تكون فيها ؟	ممكن تديني إشارة بالضوء لما تكون فيها؟
ممكن تصرفلي الشيك السياحي اللي بميه دولار ده من فضلك؟	هل ستصرف هذا الشيك السياحي البالغ مئة دولار من فضلك ؟	ممكن تصرف الشيك السياحي ده بمية دولار، من فضلك؟
ابيض، من فضلك .	الأبيض , من فضلك .	الأبيض، لو سمحت.
مش متأكد اني حأقدر أديلك مساعده كويسة .	لا أعتقد أني سأكون ذو أهمية كبيرة لك .	مش فاكر إني هبقى مهم ليك قوي.
نسبة عمولتك قد إيه؟	ما هو معدل عمولتك ؟	إيه نسبة عمولتك؟
موافقك . لازم تكون طبيعية جدا .	أوافق . يجب أن تصبح طبيعية جداً .	موافق. لازم تبقى طبيعية جداً.
ده للأطفال؟	هل هذا للأطفال ؟	ده للأطفال؟
عينيا حمرا بلون الدم .	عيني محمرة قليلا .	عيني محمرة شوية.
خليني اشيك على زيت الفرامل و الموتور . الموتور شكله غالبا عطلان .	دعني افحص سائل الفرامل والمحرك . يبدو أن محرك سيارتك قد أوشك علي التوقف .	خليني أشيك على زيت الفرامل والموتور. شكله موتور عربيتك قرب يقف.
هى الطيارة دى هتطلع امتى؟	متى تغادر هذه الطائرة ؟	الطيارة دي بتطلع إمتى؟
ممكن ابعت ده مسجل؟	هل يمكن أن أرسل هذا مسجلاً ؟	ممكن أبعت ده بالبريد المسجل؟
عايز اسجل الشنطة ديه .	أريد التثبت من هذه الحقيبة .	عايز أأمن الشنطة دي.
عندكم نفس الحلق بألوان تانيه؟	هل لديكم نفس القرط ولكن بألوان أخرى ؟	عندكم نفس الحلق ده بألوان تانية؟
ممكن استلف كتان؟	هل لي في استعارة بعض البياضات ؟	ممكن أستعير شوية ملايات؟
القطر المحلي بياخد وقت قد إيه عشان يوصل لبوسطن؟	كم المدة التي سيأخذها القطار المحلي حتى يصل إلى بوسطن ؟	القطر المحلي بياخد قد إيه عشان يوصل بوسطن؟
في حمام في المحطة.	في غرفة انتظار بالمحطة .	في صالة الانتظار في المحطة.
قضيت وقت ممتع النهاردة .	لقد أمضيت وقتاً ممتعاً اليوم .	قضيت وقت لطيف النهارده.
عاوز آخد راحة.	أريد أن أحصل على استراحة .	عايز آخد استراحة.
اوه، اشكرك . بيتي، ممكن تيجيلي، من فضلك؟	أوه ، شكراً . بيتي ، هلا أتيت ، من فضلك ؟	آه، شكراً. بيتي، ممكن تيجي لو سمحتي؟
عايز روج . بأفضل اللون الروز .	أريد شراء أحمر شفاه . أريد اللون الوردي .	عايزة أشتري روج. عايزة اللون البمبي.
أنا بروح للتزلج عالجليد مرتين في الشهر خلال الموسم.	إني أتزلج مرتين في الشهر خلال الموسم .	بتزلج مرتين في الشهر خلال الموسم.
من فضلك لف كل حاجه لوحدها .	من فضلك لفها كل على حدة .	من فضلك لفها كل واحدة لوحدها.
عربيتي مش حتكون متاحة بكره .	سيارتي ليست متاحة غدا .	عربيتي مش متاحة بكرة.
شامل الخدمة و الضريبة؟	هل يشمل رسم الخدمة والضريبة ؟	السعر ده شامل الخدمة والضريبة؟
مش عارف أحط انهي واحدة.	لا أعرف أيها أضع .	مش عارف أحط أي واحد.
فين أوضة تبديل اللبس؟	أين حجرة الخزائن ؟	فين أوضة الخزن؟
ايوه . بأدور على فستان .	نعم ، أنا أبحث عن فستان .	أيوة، بدور على فستان.
ممكن توريني لسته بموضات الشعر؟	لو سمحت أرني قائمة بأنواع تسريحات الشعر .	من فضلك وريني قائمة بأنواع تسريحات الشعر.
عايز كورس مايزيدش عن اسبوع، لو سمحت .	أريد إجازة لمدة أسبوع واحد من فضلك .	عايز أجازة أسبوع، من فضلك.
ده مشطشط؟	هل هذا متُبل ؟	الأكل ده متبل؟
عايز بفتيك من لحم جنب البقرة سرلوين و بطاطس محمرة .	أريد شريحة لحم بقري مع بطاطس محمرة .	عايز ستيك مع بطاطس محمرة.
عايز كتاب نحو .	أريد كتاب في قواعد اللغة .	عايز كتاب في النحو.
ده بيت ممتاز .	هذا بيت رائع .	البيت ده جميل.
متهيألي نقدر . و ادي الاستمارة بتاعك .	أعتقد أننا نستطيع . ها هي ورقتك .	أعتقد إننا نقدر. اتفضل ورقتك.
أعمل اللي بتقوله وقول اللي بتعمله.	تحدث وسر .	اتكلم وامشي.
لو سمحت وريني جواز سفرك .	من فضلك أرني جواز سفرك .	لو سمحت وريني جواز سفرك.
ممكن تجيبلي شوية مية، لو سمحت؟	هل يمكنك أن تحضر لي شيئاً من الماء من فضلك ؟	ممكن تجيبلي شوية مية، من فضلك؟
عندي وجع في معدتي، ممكن أخد علاج؟	مصاب بألم في المعدة . هل لي أن أحصل على بعض الأدوية ؟	عندي وجع في معدتي. ممكن أخد شوية دوا؟
ممكن تملا النموذج ده؟	هل تستطيع ملء النموذج ؟	ممكن تعبي الفورمة؟
تقدر تشتري تذكرة بورقة الف ين من المكنه ديه .	يمكنك أن تشتري تذكرة بورقة فئة ألف ين من هذه الماكينة .	ممكن تشتري تذكرة بألف ين من الماكينة دي.
إديني ال، آه، الطبق الأزرق المخصوص.	أعطني الـ , أووه , طبق اليوم الرئيسي هذا .	هاتلي، آه، طبق اليوم ده.
اه يا ربي .	يا إلهي .	يا نهار أبيض.
آه، عندنا. عايز نوع إيه؟	أجل ، لدينا منها . ما النوع الذي تريده ؟	أيوة، عندنا. أي نوع عايزه؟
إديني اللي هناك دي.	من فضلك اعطني هذه .	من فضلك اديني دي.
هو فيه أي حد بيتكلم إنجليزي هنا؟	هل يتكلم أي شخص هنا الإنجليزية ؟	حد هنا بيتكلم إنجليزي؟
في ايام رأس السنة . و في المناسبات الخاصة زى خفلات الزفاف، حقلات توزيع الجوايز او الجنازات .	في أيام السنة الجديدة . وفي مناسبات خاصة مثل حفلات الزواج ومراسم منح الجوائز أو في العزاء .	في رأس السنة وفي المناسبات الخاصة زي الأفراح وحفلات توزيع الجوائز أو العزا.
للأسف مش دلوقتي. رحلتنا بتاعة الساعة واحدة هي أول واحدة طالعة.	أخشى ألا يمكن ذلك الآن . فرحلة الساعة الواحدة هي أول رحلة تالية .	بخاف مفيش دلوقتي. رحلة الساعة 1 هي أول رحلة.
ممكن تورينى اثبات شخصية؟	هل لك أن تريني عددا ً من بطاقات تحقيق الهوية ؟	ممكن توريني شوية بطاقات تحقيق الهوية؟
عايز شنطي تخلوها عندكم لحد الساعة تلاته .	أريدكم أن تحتفظوا لي بحقائبي حتى الساعة الثالثة .	عايزكوا تحتفظوا بشنطي لحد الساعة 3
فيه كطاعم تايلاندي قريبة؟	هل يوجد مطعم تايلاندي قريب من هنا ؟	في مطعم تايلاندي قريب من هنا؟
عايز كحك دونات، من فضلك .	أريد كعكة محلاة من فضلك .	عايز كيك محلاة، لو سمحت.
من فضلك أدفع رسوم النقل علشان توصل هناك .	من فضلك ادفع أجر النقل للوصول هناك .	من فضلك ادفع أجرة النقل عشان نوصل هناك.
أدفع كام لتاكسي يوصلني للفندق ده؟	كم أجرة التاكسي حتى هذا الفندق ؟	كام أجرة التاكسي لحد الفندق ده؟
عندك اي رحلات للبانثيون؟	هل لديكم أي جولات للبانتيون ؟	عندكم جولات للبانتيون؟
اتعصبت عليه.	لقد انفعلت عليه .	أنا انفعلت عليه.
احب ارجع هنا تاني لما اكون في اميركا .	أتمنى أن أعود إلى هذا المكان ثانية عندما أكون في الولايات المتحدة .	بتمنى أرجع المكان ده تاني لما أكون في أمريكا.
الواد ده جرى قدام عربيتي .	فر هذا الصبي أمام سيارتي .	الولد ده جري قدام عربيتي.
حيكون عندنا حفلة صغيرة في بيتنا الاسبوع الجاي . انا باسأل ان كان ممكن تيجي انت و مراتك .	سنقيم حفلة صغيرة في منزلي الأسبوع القادم . تُرى ، هل ستستطيع الحضور مع زوجتك ؟	هنعمل حفلة صغيرة في بيتي الأسبوع الجاي. تفتكر تقدر تيجي مع مراتك؟
بقى عندك وقت؟	هل عرفت الموعد ؟	عرفت الميعاد؟
حتقعد اد ايه؟	كم ستمكث ؟	هتقعد قد إيه؟
أي حاجة أي أكبر منها؟	هل لديك أحجام أكبر ؟	عندكم مقاسات أكبر؟
القطر ده بيقف بسرعة كده في محطة إي.	يتوقف هذا القطار وقفة قصيرة في محطة إي .	القطر ده بيقف وقفة صغيرة في محطة إي.
غيرلي الدولارات الاميريكية اللي معايا بين ياباني، من فضلك .	حول هذه الدولارات الأمريكية إلي الين ياباني ، من فضلك .	حول الدولارات دي لين ياباني، لو سمحت.
معاك كيدا من أوضة سبعمية تسعة و عشرين . عندي وجع جامد في بطني . من فضلك أتصلي بدكتور .	هذه كيدا في الغرفة سبعة تسعة وعشرين . عندي آلم شديد بمعدتي . من فضلك استدع لي طبيباً .	دي كيدا في أوضة سبعة تسعة وعشرين. عندي ألم شديد في معدتي. من فضلك هاتلي دكتور.
ساعتي. دي كانت موديل جديد مصنوعة في سويسرا ديجيتال.	ساعتي . لقد كانت ساعة رقمية ماركة حديثة سويسرية الصنع .	ساعتي. كانت ساعة رقمية سويسرية ماركة جديدة.
الاسكور دلوقتي كورة برة . و اتنين سترايك .	إنّ الإحصاء كرة واحدة وضربتين .	الإحصاء بيقول كرة واحدة وضربتين.
تلاقي الحماسه كلها قي كرة قدم الجامعات الامريكية .	في كليات أمريكا كرة البيسبول هي اللعبة الأكثر شعبية .	في كليات أمريكا البيسبول هي اللعبة الأكثر شعبية.
ده حراق شويه، بس متهيألي انك حتحبه .	إنها حريفة بعض الشيء ، ولكن أعتقد أنها ستحوز على إعجابك .	حامية شوية، بس أعتقد إنها هتعجبك.
سلاطة، من فضلك .	سلطة ، من فضلك .	سلطة، لو سمحت.
ممكن لو سمحت تغير الكرسي بتاعي؟	هل يمكن أن تغير مقعدي من فضلك ؟	ممكن تغير مقعدي، لو سمحت؟
اللون ده منتشر الأيام دي.	هذا اللون مرغوب هذه الأيام .	اللون ده مطلوب اليومين دول.
إيه الأماكن المتاحة؟ أنا عايز أقعد ف أي مكان في النص.	ما هي المقاعد المتاحة ؟ أريد الجلوس في المنتصف .	إيه الكراسي المتاحة؟ عايز أقعد في النص.
من فضلك تعالى للأتوبيس الساعة تلاته .	من فضلكم عودوا إلى الحافلة عند الثالثة .	من فضلكم ارجعوا للأتوبيس الساعة تلاتة.
ممكن من فضلك تغيرلي اوضتي؟	هلاّ من فضلك بدّلت لي غرفتي ؟	ممكن تغيرلي الأوضة، لو سمحت؟
هو فيه أتوبيس جوة المدينة؟	هل ثمة حافلة إلى وسط المدينة ؟	في أتوبيس لوسط البلد؟
حأخد من يومين ل تلات تيام.	ستستغرق تقريباً يومين أو ثلاثة .	هتاخد تقريباً يومين أو تلاتة.
ايه المسموح ان الراكب يشيل معاه في شنطة في رحلة الطيران؟	ما المدى المسموح للأمتعة على هذه الرحلة ؟	الوزن المسموح للشنط في الرحلة دي قد إيه؟
ده مضمون؟	هل هذا معه ضمان ؟	ده عليه ضمان؟
ايه رأيك تجرب الهامبرجر؟	ماذا عن تجربة الهامبرجر ؟	إيه رأيك في تجربة الهامبرجر؟
هاقعد كام يوم.	أنوي البقاء بضعة أيام .	ناوي أقعد كذا يوم.
لو سمحت بس تعالى المرة الجاية .	ارجوا أن تحضر المرة القادمة فقط .	ياريت تحضر المرة الجاية بس.
عايز شهادة طبية وفاتورة للتأمين بتاعي.	أريد شهادة طبية وإيصال من أجل التأمين الخاص بي .	عايز شهادة طبية وإيصال عشان التأمين بتاعي.
ايوه . أقدر أساعدك؟	نعم . هل أستطيع مساعدتك ؟	أيوة. ممكن أساعدك؟
انا بأتكلم قليل . لكن الكلام حاجه و الفهم حاجه تانية خالص . على سبيل المثال، انا عارف معنى كلمة "فورينرز" يعني اجانب . .لكن ما اقدرش عرف اى خط هو للأجانب .	قلما أتحدث . بيد أن التحدث والفهم شيئان مختلفان . على سبيل المثال ، أعرف كلمة " أجنبي " ، غير أنني لا أستطيع أن أخبر عن الخط المخصص للأجانب .	نادراً ما بتكلم. بس الكلام والفهم حاجتين مختلفين. مثلاً، أعرف كلمة "أجنبي"، بس مقدرش أقولك الخط المخصص للأجانب.
ما تعتقدش اني محتاج كتيب ارشادي؟	ألا تعتقد أنني سأكون في حاجة إلى دليل ؟	مش شايف إن أنا هحتاج دليل؟
تعرف مطعم كويس نفدر نلاقي فيه أكل كويس بسعر مناسب؟	هل تعرف مطعماً جيداً نستطيع أن نتناول فيه وجبات جيدة بسعر مناسب ؟	تعرف مطعم كويس نقدر نأكل فيه أكل كويس وسعره مناسب؟
ممكن تذكرتين ل "البؤساء" يوم سبعة يونيو؟	هل يمكنني الحصول على تذكرتين لرواية " البؤساء " في السابع من يونيو ؟	ممكن آخد تذكرتين لمسرحية "البؤساء" يوم سبعة يونيو؟
انا من أميركا .	أنا الولايات المتحدة .	أنا في أمريكا.
ده طازه؟	هل هو طازج إلى هذا الحد ؟	هو طازة للدرجة دي؟
أشوفك . كلمني بكرة .	وداعا واتصل بي غداً .	مع السلامة وكلميني بكرة.
عاوز شيال، لو سمحت.	من فضلك ، أحتاج حمال .	من فضلك، محتاج شيال.
لسه شويه تدينا شويه دقايق كمان؟	ليس بعد . هل يمكن أن تعطينا بعض الدقائق الإضافية ؟	لسه. ممكن تدينا شوية وقت زيادة؟
فيه أى تعديلات انت عايز تعملها؟	هل هناك أي تعديلات تحب أن نجريها ؟	في أي تعديلات عايزنا نعملها؟
تواليت، مليان.	حمام ، فيضان .	الحمام، غرقان.
عايز راديو بيشتغل بالساعة، إذا سمحت .	أريد ساعة براديو من فضلك .	عايز ساعة براديو، لو سمحت.
في حاجة ظهرت لازم اتكلم معاه فيها. فلو سمحت قوله يكلمني أول ما يرجع.	طرأ شيء لابد أن أتحث معه حوله . من فضلك أطلب منه أن يتصل بي بمجرد عودته .	حصل حاجة لازم أكلمه عنها. من فضلك قوله يكلمني أول ما يرجع.
ياالهي، انا ماكنتش عارف انها بتاخد شهر علشان تطلع كريديت كارد .	هل هذا معقول ! أنا لم أعلم أن بطاقة الائتمان تستغرق على الأقل شهرا .	معقول! معرفتش إن بطاقة الائتمان بتاخد على الأقل شهر.
اغسل ده على بكرة تسعة الصبح .	أغسل هذا قبل التاسعة من صباح الغد .	اغسل ده قبل الساعة تسعة الصبح بكره.
فين عربية الأكل؟	أين عربة الطعام ؟	فين عربية الأكل؟
خلينا نستنى المساعده .	دعنا ننتظر المساعدة .	خلينا نستنى المساعدة.
عايز فيلتر، من فضلك .	أود مرشحاً ، من فضلك .	عايز فلتر، لو سمحت.
عايز ابعت برقية .	أود إرسال برقية .	عايز أبعت برقية.
ممكن ابدا رحلتي من بكرة؟	هل أستطيع مواصلة رحلتي من غداً ؟	ممكن أكمل رحلتي من بكره؟
إتنين سكوتش ومية، من فضلك.	اثنان ويسكي مع الماء , من فضلك .	اتنين ويسكي بالمية، لو سمحت.
أنا هنا عشان كورس لغة.	أنا موجود هنا لأحصل علي دورة في اللغة .	أنا هنا عشان آخد كورس في اللغة.
أزاي أعررف الشخص ده؟	كيف أستطيع أن أتعرف على هذا الشخص ؟	إزاي أقدر أتعرف على الشخص ده؟
انا مش عارف عنواني لحد دلوقتي، بس انا باخطط إني استنى في اوتيل في سان فرانسيسكو .	أنا لم أعرف عنواني بعد . لكنّي أخطّط للبقاء في فندق في سان فرانسيسكو .	لسه معرفش عنواني. بس ناوي أقعد في فندق في سان فرانسيسكو.
من فضلك بلغ مستر توماس اني نازل في فندف هيلتون .	من فضلك أخبر السيد توماس أنني أقيم في فندق الهليتون .	من فضلك قول للأستاذ توماس إني نازل في فندق الهليتون.
هو الضمان شغال في اليابان؟	هل الضمان ساري في اليابان ؟	الضمان ده شغال في اليابان؟
احنا لسه جايين لأميركا من اليابان امبارح .	نحن حضرنا إلى أمريكا من اليابان أمس .	جينا أمريكا من اليابان امبارح.
من فضلك وريني باسبورك و نموذج الهجرة .	لطفاً أرني جواز سفرك ونموذج الهجرة .	من فضلك وريني جواز سفرك وفورمة الهجرة.
تلات كوبايات عصير شمام، من فضلك.	ثلاثة أقداح من عصير الشمام ، من فضلك .	تلات كبايات عصير شمام، لو سمحت.
اصرفلي الروشته ديه، لو سمحت .	املأ هذه الوصفة , من فضلك .	املا الروشتة دي، لو سمحت.
ممكن تبعتلي الجواب ده بالبريد؟	هل لك أن ترسل لي هذه الرسالة بالبريد ؟	ممكن تبعتلي الجواب ده بالبريد؟
انا اسف، لازم تدفع مفدما اجر تسعه و تسعين يوم .	أنا آسف ، مطلوب دفع دفعة مقدمة قبل ذلك بتسعة وتسعين يوماً .	آسف، لازم ندفع مقدم قبلها بتسعة وتسعين يوم.
احنا مهتميين بعلم الاثار .	نحن مهتمون بعلم الآثار .	احنا مهتمين بعلم الآثار.
أكيد . كنا مشغولين قوي امبارح . بس النهارده المكان فاضي و هادي قوي . امتى طيارتك ماشية؟	بالتأكيد . كنا مشغولون للغاية أمس ، بيد أن المكان خاو اليوم . متى ستقلع طائرتك .	أكيد. كنا مشغولين جدًا امبارح، بس النهارده فاضي. طيارتك بتطلع إمتى؟
محفظة و كاميرا .	حافظة نقود وكاميرا .	محفظة وكاميرا.
اشتراكي شامل الجولة الاختيارية دي.	تتضمن حزمتي هذه الرحلة الاختيارية	الباكدج بتاعتي بتشمل الرحلة الاختيارية دي.
ممكن تتحرك لليمين شوية؟	هل يمكنك أن تتحرك قليلاً لجهة اليمين ؟	ممكن تتحرك شوية على اليمين؟
امتى نقدر ناكل؟	في أي وقت نستطيع تناول العشاء ؟	إمتى ممكن نتعشى؟
أعتقد إن أحب آخد اتنين من اللي أرخص.	أعتقد أنني سأحصل على اثنين أقل سعراً .	أعتقد إني هاخد اتنين أرخص.
ممكن آخد عصير برتقان؟	أريد عصير برتقال , من فضلك .	عايز عصير برتقال، لو سمحت.
عايز كرسي في النص في منطقة الستالز .	أريد مقعداً أمامياً .	عايز كرسي قدام.
آه، في. أهو القطر جه. يومك جميل.	أجل ، يوجد . ها هو القطار قادم . أتمنى لك يوماً طيباً .	أيوة، في. أهو القطر جاي. يومك سعيد.
أنا فاتح الأربع الصبح أو الجمعة بعد الضهر.	أنا جاهز صباح الأربعاء أو بعد ظهر الجمعة .	أنا متاح صباح الأربعاء أو بعد الظهر يوم الجمعة.
اكله خفيفه لو سمحت .	وجبة خفيفة , من فضلك .	وجبة خفيفة، لو سمحت.
تمن تذكرة الدرجة الأولى كام؟	ما هي قيمة التذكرة درجة أولي ؟	تذكرة الدرجة الأولى بكام؟
في نيويورك . ومكتب السفريات قالي ان كل حاجه حتكون تمام .	في نيويورك . وشركة السياحة قالت إنه ينبغي أن يكون صالحاً .	في نيويورك. وشركة السياحة قالت إنه لازم يكون صالح.
استمتعت بأفامتي، أشكرك .	لقد تمتعت بإقامتي . شكراً لك .	استمتعت بإقامتي. شكراً ليك.
المدافع اللي اتقدمت لليابان في الوقت ده لعبت دور مهم في فوز المعارك.	لقد لعبت المدافع التي أدخلت لليابان في ذلك الوقت دوراً مهماً في كسب المعارك .	المدافع اللي دخلت اليابان وقتها لعبت دور مهم في كسب المعارك.
زميلي اتكعبل و عنده التواء في الانكل .	تعثر صديقي والتوي كاحله .	صاحبي وقع ولف كاحله.
منظر جميل قوي .	يا له من منظر !	يا لهوي على المنظر!
عايز حاجات نوعها ايه؟	ما نوع السلع التي تبغيها ؟	عايز تشتري إيه؟
فين مكتب التسجيل بتاع شركة دلتا؟	أين طاولة التسجيل الخاصة بشركة دلتا ؟	فين طاولة التسجيل بتاعة دلتا؟
مش غالي قوي . اوكي . تمام، عندنا اوتيل كويس اسمة ذا بيفرلي . عالناحية الشرقية .	ليس باهظاُ جداُ . حسناُ . حسنا سنقيم في فندق جميل اسمه البيفرلي . إنه يقع في إيست سايد .	مش غالي قوي. تمام. هنقيم في فندق حلو اسمه البيفرلي. موجود في إيست سايد.
ادينا وصلنا . كراسيك حتلاقيها هنا .	إنها هنا . مقاعدكم تقع بالقرب من هنا .	هي هنا. كراسيكم جنب هنا.
غسيلي مجاش لسة.	الغسيل الخاص بي لم تأتي بعد .	هدومي لسه ماجتش من الغسيل.
معاك تذكرة؟	هل لديك تذكرة ؟	معاك تذكرة؟
هو فيه غلط في الفاتورة دي؟	هل هناك خطأ في هذه الفاتورة ؟	في غلطة في الفاتورة دي؟
مخزن الأدوات المكتبية منين؟	أين المخزن الخاص بالمكتبة ؟	فين مخزن المكتبة؟
لأ . حاجة احطها عالجسم .	لا . شيء ما لوضعه على الجسم .	لأ. حاجة للجسم.
فين مترو الانفاق؟	أين مترو الأنفاق ؟	فين المترو؟
بص بره . انا اهوه جاي .	انظر في الخارج . ها أنا قادم .	بص برا. أنا جاي.
ممكن ارتب حاجتي دلوقتي؟	هل لي أن أنصب معداتي الآن ؟	ممكن أركب العدة بتاعتي دلوقتي؟
أكيد فيه حاجة غلط.	لا بد أن يكون هناك خطأ ما .	لازم في غلطة.
اسف، ما اقدرش . انا بأقف بس عند الفنادق اللي في اللسته ديه .	آسف ، لا أستطيع . لا يمكنني التوقف إلا عند الفنادق الموجودة بتلك القائمة .	آسف، مش أقدر. مش هقف إلا في الفنادق اللي في القائمة دي.
عايز اضافات ايه؟	ماذا تريد فوقها ؟	عايز إيه عليها؟
انا مش بألومك أنك اتنرفزت .	لا ألومك على شعورك بالغضب .	مش بلومك على غضبك.
مانقدرش نروح بعيد مع ده .	لا يمكنك أن تفلت بذلك .	مش هينفع تفلت بكده.
ده صوف نقي؟	هل هو صوف خالص ؟	ده صوف خالص؟
لو ممكن، ممكن ترابيزة جنب الشباك.	إذا كان ممكناً ارغب في مائدة بجوار النافذة .	لو ممكن عايز ترابيزة جنب الشباك.
معاك بطاقة شخصية عليها صورتك؟	هل لديك أي صورة لبطاقة هوية ؟	معاك صورة بطاقة هوية؟
عايز كوكيز شوكولاته .	من فضلك أعطني رقائق الشكولاته كوكي .	من فضلك اديني كوكيز بشوكولاتة.
الكيمونو هو اللبس التقليدي لليابان.	الكيمونو هو الزي التقليدي لليابان .	الكيمونو هو اللبس التقليدي لليابان.
ابعت ده بالبريد الجوي لليابان، لو سمحت.	أرجو أن تبعث هذا بالبريد الجوي إلى اليابان .	ياريت تبعت ده بالبريد الجوي لليابان.
أول قطر لشيكاغو هايقوم إمتى؟	متى يغادر القطار التالي المتجه إلى شيكاغو ؟	القطر اللي جاي على شيكاغو بيطلع إمتى؟
أيوة، في واحد من الناحية التانية من البيت.	نعم ، يوجد واحد علي الجانب الآخر من المبني .	أيوة، في واحد على الناحية التانية من المبنى.
انا لسه في اول التنلاتينات .	أنا في أوائل الثلاثينات .	أنا في أوائل التلاتينات.
للفندق، من فضلك .	إلى الفندق من فضلك .	على الفندق لو سمحت.
طعمة حلو العنب ده .	مذاق هذا العنب جيد .	طعم العنب ده حلو.
مش بالظبط، للأسف. تاخد المترو هنا على مسئوليتك، أنا قلتلك.	لا حقيقة , أنا أخشى ذلك , يمكنك أن تركب مترو الإنفاق من هنا بمخاطرة منك إذا صح أن يقال .	لا، بصراحة أخاف كده. ممكن تركب المترو من هنا على مسؤوليتك.
بتقول اسم المكان ده إزاي؟	كيف تنطق الاسم الخاص بهذا المكان ؟	إزاي تنطق اسم المكان ده؟
عايز أبدل ده.	أود أن أبدل هذا .	عايز أبدل ده.
مفيش أدوات مكتبية.	لا يوجد هنا مكتب أدوات مدرسية .	مفيش مكتب أدوات مدرسية هنا.
إذا سمحت شغل العداد .	من فضلك ابدأ العداد .	من فضلك شغل العداد.
توست تاني، من فضلك.	مزيداً من الخبز المحمص من فضلك .	شوية توست زيادة، لو سمحت.
أنا عاهدت نفسي لما شفتك إني لازم أعرفك.	لعد تعهدت لنفسي بأنني سوف أتعرف عليك عندما أراك .	وعدت نفسي إني هتعرف عليك لما أشوفك.
تلعب معايا؟	هل تلعب معي ؟	هتلعب معايا؟
من فضلك أقف و أستنى لحد ما اخد صورة لجسر واترلو .	من فضلك توقف و انتظر حتى أخذ صورة جسر واترلوو .	من فضلك وقف واستنى لحد ما أصور جسر واترلو.
ساعتي كانت سايكو رقميه.	ساعتي . كانت ساعة سيكو رقمية .	ساعتي. كانت ساعة سيكو ديجيتال.
عندك شنطة أكبر؟	هل يوجد لديكم حقيبة أكبر ؟	عندكم شنطة أكبر؟
لأ، بس شكرا. أنا أحسن.	لا ، ولكن شكراً لك . إنني أشعر بتحسن .	لا، بس شكراً. حاسس بتحسن.
هو في اى ناحية من يونيون سكوير؟	على أي جانب من ميدان الاتحاد هي ؟	هي على أنهي ناحية من ميدان الاتحاد؟
ده حوالي ساعة ونص .	إنه يستغرق حوالي ساعة ونصف .	بياخد حوالي ساعة ونص.
ده صديقي كوجي.	هذا هو صديقي كوجي .	ده صاحبي كوجي.
أنا آسف دلوقتي ممكن تختار من قائمة الليلة بس.	آسف فالآن لا يمكنك الطلب سوى من قائمة الطعام الليلية .	آسف، دلوقتي تقدر تطلب من منيو العشا بس.
سندوتش لحم خنزير خبز شعير، و عصير برتقان كبير، من فضلك .	ساندوتش فخذ الخنزير مع خبز الجاودار , و عصير برتقال كبير , من فضلك ؟	ساندوتش فخذ الخنزير مع خبز الجاودار، وعصير برتقال كبير، لو سمحت؟
ممكن الملح و الفل، من فضلك.	من فضلك ناولني الملح والفلفل .	من فضلك هاتلي الملح والفلفل.
الميدان فين؟	أين الميدان ؟	فين الميدان؟
بأستغرب عملوه ازاي؟	إنني أتعجب كيف يصنعونه ؟	مستغرب بيعملوه إزاي؟
ممكن تبعت واحد؟	هل يمكن أن ترسل أحدا ؟	ممكن تبعت حد؟
رقم التليفون واحد اتنين تلاته اربعة خمسة سته .	رقم الهاتف هو واحد اثنان ثلاثة خمسة ستة .	رقم التليفون هو واحد اتنين تلاتة خمسة ستة.
ديه اول رحلة ليك بره البلد؟	هل هذه هي أول رحلة خارجية لك ؟	دي أول رحلة ليك بره؟
ماشي . خلينا نراجع كل حاجه بدقة .	حسنا ، فلنتفحص كل شيء بشكل شامل .	تمام، خلينا نراجع كل حاجة بدقة.
عايز فلاش كاميرا .	أريد فلاشا .	عايز فلاش.
أنا تعبان جدا. لو سمحت هات دكتور.	اشعر بالتعب الشديد . من فضلك استدع طبيباً .	حاسس بتعب شديد. من فضلك هات دكتور.
حديقة الحيوان مقفولة؟	هل حديقة الحيوان مغلقة ؟	الجنينة مقفولة؟
تشيك آوت، من فضلك .	سأسجل خروجي ، من فضلك .	هعمل تشيك أوت، من فضلك.
معاك جواز السفر و التذكرة؟ شايف، دي سوق حرة.	هل معك جواز السفر والتذكرة ؟ أنت ترى ، فهذا متجر معفى من الرسوم .	معاك جواز السفر والتذكرة؟ أصل ده محل معفي من الجمارك.
مين الفنان؟	من مكان الفنّان ؟	منين الفنان؟
الطيارة حتطلع تمانيه و نص الا خمسه الصبح من مطار سان فرانسيسكو .	إنها تقلع في الساعة ثمانية عشرين-خمسة صباحا من مطار سان فرانسيسكو .	بتطلع الساعة 8:25 الصبح من مطار سان فرانسيسكو.
أنا اطردت من البيت. تقترح أعمل إيه؟	لقد أغلقت الباب و أنا بالخارج . ماذا تقترح على أن أفعله ؟	قفلت الباب وانا بره. تقترح أعمل إيه؟
ده عمي.	هذا هو عمي .	ده عمي.
انا اسف، بس محتاج حد يساعدني .	معذرة ، لكني أريد أحداً لمساعدتي .	لو سمحت، محتاج حد يساعدني.
البريد الجوي؟ خلينا نشوف، ده حيكلفك ميه و تمانين دولار .	بريد جوى ؟ دعنا أن نعرف , من المحتمل أن يتكلف هذا مائة وثمانون دولارا .	بريد جوي؟ خلينا نعرف، ده ممكن يكلف 180 دولار.
عايز شوية شرابات .	أريد بعض الجوارب .	عايز شوية شرابات.
اللي بيوزعو الورق يقدرو يبدلو دولاراتك بقواشيط الكازينو . نروح؟	يستطيع الصرافون أن يغيروا دولاراتك من أجل بقشيش الكازينو . هل نذهب ؟	الصرافين ممكن يغيروا دولاراتك عشان بقشيش الكازينو. نروح؟
ممكن تبدلي التذكرة ديه بفلوس؟	هل لك أن تغير هذه العملة الورقية إلى نقود معدنية ؟	ممكن تغير الورقة دي لفكة؟
كرسي جنب الشباك، إذا سمحت .	مقعدا بجوار النافذة ، من فضلك .	كرسي جنب الشباك، من فضلك.
ممكن تقوللي الاسم تاني؟	هل يمكنك أن تخبرني بالاسم ثانية ؟	ممكن تقوللي الاسم تاني؟
محفظتي فر حرامي سرقها.	أخذ نشال محفظتي .	نشال خد محفظتي.
هاسأل لو ينفع آخد صورة معاه.	سأسأل إذا ما كان بإمكاني التقاط صورة معه .	هسأل لو ممكن أتصور معاه.
عاوز أوصل للمطار قبل الساعة سته .	أريد الوصول للمطار قبل الساعة السادسة .	عايز أوصل المطار قبل الساعة ستة.
ترشحللي مطعم كويس؟	هل لك أن تزكي لي مطعما جيدا ؟	ممكن ترشحلي مطعم كويس؟
لايمكن . احنا في اجازة . ارفض اني افضل في اوضه فندق و اتفرج عالبيسبول في التليفزيون . انا عايز اخرج اتفرج على مسرحية .	مستحيل . نحن في إجازة . إنني أرفض الجلوس في غرفة بالفندق ومشاهدة البيسبول في التلفاز . أريد الذهاب لمشاهدة مسرحية .	مستحيل. احنا في أجازة. مش عايز أقعد في أوضة الفندق وأتفرج على البيسبول في التلفزيون. عايز أروح أتفرج على مسرحية.
بياخد كام ساعة عشان يوصل هناك؟	كم ساعة سيستغرق الذهاب إلى هناك ؟	هياخد كام ساعة نوصل هناك؟
ممكن تخليلي دي؟	هلا احتفظت بهذا لي ؟	ممكن تحتفظ بده لي؟
مقطوع.	إنه ممزق .	ده مقطوع.
أنا بلاقي المرواح للمتاحف مريح جدا.	أري أن الذهاب إلى المتاحف أمر مريح جداً .	شايف إن زيارة المتاحف حاجة مريحة جداً.
فين بلد سمك الفراشه ده؟	أين نشأت سمكات الفراش هذه ؟	السمك الفراش ده جاي منين؟
عايز نبيت أحمر منغير سكر، لو سمحت.	أريد الصبغ باللون الأحمر من فضلك .	عايز أصبغ باللون الأحمر، من فضلك.
نص مستوي.	شبه نادر .	نادر شوية.
بوابة خمسة وتلاتين منين؟	أي الطرق تؤدي إلى البوابة خمس وثلاثين ؟	أنهي طريق يوصل للبوابة 35؟
عايز دوا.	أريد بعض الدواء .	عايز شوية دوا.
ملايين من الناس بيزورو الاضرحة الشهيرة اول ايام السنه للعبادة .	ملايين من الناس تزور الأضرحة المشهورة في الصلاة الأولى من العام .	ملايين الناس بيزوروا الأضرحة المشهورة في أول صلاة في السنة.
بتبيع كم كرتونه حليب في الاسبوع؟	كم عدد عبوات اللبن التي تشتريها أسبوعياً ؟	بتشتري كام علبة لبن في الأسبوع؟
اشحنلي البطارية ديه، من فضلك .	اشحن البطارية من فضلك .	اشحن البطارية، من فضلك.
عايز أحلي، من فضلك .	أريد بعض الحلوى ، من فضلك .	عايز شوية حلوى، من فضلك.
يوصل هناك تسعة، لو سمحت.	كن هناك بحلول التاسعة ، من فضلك .	خليك هناك على الساعة تسعة، من فضلك.
احنا بنحط مبلغ اضافي عند الغاء الحجز .	نحن نتقاضى غرامة إلغاء .	احنا بنأخد غرامة على الإلغاء.
أطلبلي تاكسي لو سمحت.	من فضلك استدعي لي السيارة الأجرة .	من فضلك هاتلي تاكسي.
احسنلك تطلب قسم المفقودات.	يفضل أن تتصل بقسم " المفقودات و الأشياء التي عثر عليها . "	يفضل تتصل بقسم المفقودات واللقايا.
ممكن تاخدني للمستشفى؟	هل يمكن أن تأخذني إلى المستشفى ؟	ممكن توصلني للمستشفى؟
لو سمحت عايز كرسي جنب الممر في النص .	من فضلك أجعل لي كرسي بجانب الممر في المنتصف .	عايز كرسي جنب الممر في النص، لو سمحت.
ماقصدتش أجرح مشاعرك.	لم اقصد أن أؤذي مشاعرك .	ماكنتش أقصد أجرح مشاعرك.
أول ماتش إمتى؟	متى الشوط الأول ؟	الشوط الأول إمتى؟
عندك أي أكلة خفيفة تمشي مع المشروب بتاعي؟	هل عندك أي وجبات خفيفة أتناولها مع شرابي ؟	عندك أي سناك أكلها مع الشرب؟
رقم رحلة الطيارة هو بي كي سبعة صفر تمانية يوم خمسه سبتمبر .	الرحلة الباكستانية رقم سبعة صفر ثمانية في الخامس من سبتمبر .	الرحلة الباكستانية رقم 708 يوم 5 سبتمبر.
اللي بعده.	الشخص الذي يليه .	اللي بعده.
ممكن أكلم المدير؟	هل أستطيع التحدث مع المدير ؟	ممكن أكلم المدير؟
محفظتي ضاعت مني .	فقدت محفظتي .	ضيعت محفظتي.
هو ده قطر مباشر؟	هل هذا القطار لا يتوقف ؟	القطر ده مش بيقف؟
ايوة، من فضلك . ده فيلم مصنوع في اليابان؟	نعم ، من فضلك . هل هذا فيلم من صنع اليابان ؟	أيوة، لو سمحت. الفيلم ده من صنع اليابان؟
من فضلك اديني شويه شاش.	من فضلك أعطني بعض الشاش .	من فضلك اديني شوية شاش.
انت متأكد ان ماعندكش حجز بأسم "سوزوكي"؟ طيب فيه " تيتسو"؟	هل أنت متأكد أنك لم تحجز باسم سوزوكي ؟ فماذا عن تيتسيو ؟	متأكد إنك ماحجزتش باسم سوزوكي؟ طيب تيتسيو؟
معنديش أي حجز، بس هو ممكن أروح الغوص بعد الضهر النهاردة؟	ليس لدي حجز ، ولكن هل يمكنني الغوص هذا العصر ؟	ماعنديش حجز، بس ممكن أغوص النهارده بعد الظهر؟
عايز اصلحه بعد ما ارجع اليابان .	أريد تصليحها بعد عودتي إلى اليابان .	عايز أصلحها بعد ما أرجع اليابان.
ما استخدمتش خدمة الغسيل عندك . ممكن تتأكد من ده تاني؟	لم أستخدم خدمة الغسيل عندكم . أيمكنك التحقق مرة أخرى ؟	ما استخدمتش خدمة الغسيل عندكم. ممكن تشوف تاني؟
إسمي ساتو.	اسمي ساتو .	اسمي ساتو.
مين اللي حيدي القرار النهائي؟	من الذي سيتخذ القرار النهائي ؟	مين اللي هياخد القرار النهائي؟
من فضلك طلع حاجتك بره الاوضه .	من فضلك ضع أغراضك خارج الغرفة .	من فضلك حط حاجتك بره الأوضة.
لمدة أسبوعين تقريبا.	لمدة أسبوعين تقريباً .	حوالي أسبوعين.
ايه رخيص و حلو؟	ما هي الأصناف الرخيصة والجيدة ؟	إيه الحاجات الرخيصة والكويسة؟
متهيألي حأقوم انام .	أعتقد أنني سأذهب لأنام .	أعتقد إني هاروح أنام.
بتدرس فين؟ بتذاكر في الأوضة هنا، ولا بتروح المكتبة؟	أين تذاكر ؟ هل تذاكر هنا في هذه الحجرة , ام انك تذهب إلى المكتبة ؟	بتذاكر فين؟ هنا في الأوضة ولا في المكتبة؟
كم المجموع؟	ما هو الإجمالي ؟	الإجمالي كام؟
العلاقات الإنسانية مهمة ف أي مجتمع، بس اليبانيين غالبا بيحاولوا بجدية إنهم يحافظوا على العلاقات كويسة وإنهم يوسعوها.	العلاقات الإنسانية مهمة في أي مجتمع ، لكن يبدو أن اليابانيين يسعون بجد إلى الحفاظ على العلاقات الطيبة وتعميقها .	العلاقات الإنسانية مهمة في أي مجتمع، بس باين إن اليابانيين بيحاولوا بجد يحافظوا على العلاقات الطيبة ويعمقوها.
في الصبح اه، لكن بليل حتبقى مغيمه .	في الصباح نعم ، ولكن في العصر يغيم الجو .	الصبح أيوة، بس بعد الظهر الدنيا بتغيم.
تذكرة اليوم الواحد بكام؟	كم تكلف تذكرة اليوم الواحد ؟	تذكرة اليوم الواحد بكام؟
قص الشعر و شامبو، إذا سمحت .	قـَصة شعر وشامبو , من فضلك .	قصة شعر وشامبو، لو سمحت.
في جنوب.	انها باتجاه الجنوب .	دي في اتجاه الجنوب.
ديه تنفع لمده ارعتاشر يوم، تقدر تستعملها لحد يوم تلاته و عشرين .	هذا العرض سارٍ لمدة أربعة عشر يوما , ولذا يمكنك استخدمه حتى الثالث والعشرين .	العرض ده ساري لمدة 14 يوم، تقدر تستخدمه لحد يوم 23.
عندك ده باللون الاخضر؟	هل عندك هذا باللون الأخضر ؟	عندك ده باللون الأخضر؟
محتاج تصريح صيد؟	هل أحتاج تصريح صيد ؟	محتاج تصريح صيد؟
او سمحت إنقلنى فى أوضة تانية.	من فضلك انقلني إلى غرفة أخرى .	من فضلك انقلني لأوضة تانية.
فهمت . أشكرك .	فهمت . شكرا لك .	فهمت. شكراً.
متقلقش لو سمحت. احنا هانحل الموضوع.	لا تقلق من هذه الناحية . فسنتولى نحن أمر ترتيبها .	ما تقلقش من الناحية دي. احنا هنتولى ترتيبها.
عدى زمن طويل قوي من اخر مره اتقابنا فيها .	لم أراه منذ زمن .	ما شفتوش من زمان.
ممكن تديني شوية دوا؟	هل لك أن تعطيني بعض الدواء ؟	ممكن تديني شوية دوا؟
إنت بتعدي على نيو أورليانز؟	هل تمر عبر نيو أورليانز ؟	بتمر على نيو أورليانز؟
مش على مقاسي .	إنه لا يلائمني .	ده مش لايق عليا.
معاك شنطة تروح بيها؟	هل لديك حقيبة لتذهب بها .	عندك شنطة تمشي بيها؟
أعذرني، امتى الطيارة توصل طوكيو؟	معذرة ، متى ستصل الطائرة إلى طوكيو ؟	معلش، الطيارة هتوصل طوكيو إمتى؟
ممكن تخلي الشنط دي، من فضلك؟	هلاً حفظت هذه الحقائب من فضلك ؟	ممكن تحفظ الشنط دي، لو سمحت؟
ممكن توريني حاجة تانية؟	هل يمكنني أن أرى شيئاً آخر ؟	ممكن أشوف حاجة تانية؟
واحد طبق أزرق مخصوص. خلصت؟	وان بلو بليت سبيشال . هل أعددته ؟	وان بلو بليت سبيشال. جهزته؟
يكلفني كام للحموله ديه علشان ابعتها عن طريق الجو؟	كم تكلفة إرسال هذا الطرد جواً ؟	كام تكلفة إرسال الطرد ده جوا؟
عندك هديه حلوة لجوزي؟	هل عندك هدية جميلة لزوجي ؟	عندك هدية حلوة لجوزي؟
عندك مسكن؟	هل لديك أي عقار مسكن ؟	عندك أي مسكن؟
مش بارد، لو سمحت.	غير مثلج من فضلك .	من غير تلج، لو سمحت.
مش برد؟	أليست باردة ؟	مش ساقعة؟
ممكن أغير كرسي ناحية قدام؟	هل أستطيع تغيير مقعدي نحو الأمام ؟	ممكن أغير الكرسي لقدام؟
ممكن تحجز ترابيزة لنفرين في المطعم ده سته بليل؟	هل ستحجز مائدة لاثنين في هذا المطعم في السادسة هذه الليلة ؟	هتحجز ترابيزة لشخصين في المطعم ده الساعة 6 الليلة؟
عايز ساعتي تتصلح . الساعة بتأخر دقيقتين كل يوم .	أريد ضبط ساعتي . إنها تؤخر حوالي دقيقتين كل يوم .	عايز أظبط ساعتي. بتأخر حوالي دقيقتين كل يوم.
بصوت أعلى، من فضلك .	بصوت أعلى ، من فضلك .	بصوت أعلى، من فضلك.
بس احنا مانقدرش نستخدمهم في اى حاجة غير في الدفاع عن النفس .	بيد أنه ليس بمقدورنا استخدامها في أي شيء فيما عدا الدفاع عن النفس .	بس مش هنقدر نستخدمها في أي حاجة غير الدفاع عن النفس.
أنا فاهم. من فضلك خد وقتك.	أري . خذ وقتك من فضلك .	فهمت. خذ وقتك، من فضلك.
ممكن تشيللي ده؟	هل لك أن تحتفظ لي بهذا معك ؟	ممكن تحتفظ بده لي؟
لأ، أشكرك .	لا ، شكراً لك .	لا، شكراً.
عايز أأجر عربية أوتامتيك ليومين .	أريد تأجير سلاح آلى لمدة يومين .	عايز أستأجر سلاح آلي لمدة يومين.
جواز سفرى اتسرق.	لقد سرق جواز سفري .	جواز سفري اتسرق.
عايز شويه موز .	أود بعض الموز ؟	عايز شوية موز؟
حأسافر على رحلة طيران تانية لباريس .	سأنتقل إلى رحلة أخرى في باريس .	هبدل الرحلة بتاعتي في باريس.
فين عامل الانقاذ؟	أين عامل الإنقاذ ؟	فين عامل الإنقاذ؟
من فضلك أفصل كل ألاجهزة الكهربائية .	من فضلك اغلق جميع الأجهزة الإلكترونية .	من فضلك اقفل كل الأجهزة الإلكترونية.
فيه كام حزب سياسي موجودين؟	كم عدد الأحزاب السياسية ؟	كام عدد الأحزاب السياسية؟
ياخد اد ايه وقت عشان نوصل لسوهو مشي ؟	كم نستغرق من الوقت للوصول إلى سوهو مشيا ؟	هنحتاج وقت قد إيه عشان نوصل سوهو مشي؟
انا بأصحى كل يوم الساعة سته .	أستيقظ في تمام السادسة كل يوم .	بصحى كل يوم الساعة ستة.
دي مسألة حياة أو موت.	إنها مسألة حياة أو موت .	دي مسألة حياة أو موت.
ممكن غسول للعين؟	هل يمكن أن أخذ بعضاً من مرطب العين ؟	ممكن أخد شوية مرطب للعين؟
لو سمحت اختارلي بلوزة كويسة.	من فضلك اختر بلوزه جيدة لي .	من فضلك اختار لي بلوزة حلوة.
الجو برد. يمكن هاطلب بطانية تانية؟	الجو بارد . ربما سأطلب بطانية أخرى ؟	الجو بارد. ممكن أطلب بطانية كمان؟
بدلي ديه بعملات معدنية، من فضلك .	غير هذه إلى عملات نقدية من فضلك .	غير دي لفكة، لو سمحت.
انا تعبان علطول من التنفس .	أعاني بشكل مزمن من الربو .	بعاني من الربو بشكل مزمن.
مقلية، من فضلك .	مقلي من فضلك .	مقلي، لو سمحت.
مانقدرش بعد كده نعمل شغل التصميم من غير الكمبيوتر .	لم يعد بإمكانك حقيقةً أن تقوم بعمل تصميم دون كمبيوتر بعد الآن .	مش ممكن تعمل تصميم من غير كمبيوتر دلوقتي.
بأدور على شنطي .	أبحث عن أمتعتي .	بدور على شنطي.
إنت لازم تروح مكتب المعلومات السياحية الأول.	يجب عليك أن تذهب إلي مكتب استعلامات السائح أولاً .	لازم تروح مكتب استعلامات السياح الأول.
ممكن نص رطل من سلطة الجمبري؟	هلا أحضرت لي نصف رطل سلطة جمبري ؟	ممكن تجيب لي نص رطل سلطة جمبري؟
هو اللي ابتدى العركة .	ابتدأ شجارا .	بدأ خناقة.
ممكن تقولي اسم ابنك؟	هل يمكن أن آخذ اسم ابنك ؟	ممكن آخد اسم ابنك؟
اسمح لي، حضرتك . عايز اشوف بعض الاماكن السياحيه في بوسطن .	عذراً يا سيدي . أود استطلاع بعض الأماكن السياحية الموجودة في بوسطن .	عذرًا يا أستاذ. عايز أتعرف على بعض الأماكن السياحية في بوسطن.
معايا تلات شنط.	لدي ثلاث حقائب .	عندي ثلاث شنط.
ممكن تشرحلي ازاي اعمل مكالمة دوليه؟	هل يمكن أن تشرح لي كيف أجري مكالمة بعيدة المسافة ؟	ممكن تشرح لي إزاي أعمل مكالمة دولية؟
اسف . بس ما اقدرشي اروح معاك .	عفواً , لكن لا أستطيع أن أذهب معك .	آسف، بس مش هقدر أروح معاك.
أنا بادور على برفيوم.	أنا أبحث عن عطر .	بدور على عطر.
عايز ترفع السوالف ديه شويه؟	هل تريد أن أقص من السوالف قليلا ؟	عايزني أقص شوية من السوالف؟
حبقى في الفندق على حوالي عشرة ونص الليلة دي.	سأصل الفندق في حوالي الساعة العاشرة والنصف مساءاً .	هأوصل الفندق حوالي الساعة 10:30 بالليل.
إحنا حجزنا كرسي لخمسة وعشرين أكتوبر بيطلع حداشر الصبح.	حجزنا مقعداً ليوم الخامس والعشرين من أكتوبر في الساعة الحادية عشر صباحاً .	حجزنا كرسي ليوم 25 أكتوبر الساعة 11 الصبح.
عايز أوضة مختلفة.	أريد غرفة أخرى .	عايز أوضة تانية.
امتى كأس العالم؟	متى سيقام كأس العالم ؟	كأس العالم هيتلعب إمتى؟
عايز أخد معاد.	أريد تحديد ميعاد .	عايز أحدد ميعاد.
هو ده شامل الفطار؟	هل يشمل ذلك الإفطار ؟	ده شامل الفطار؟
ممكن ارتاح ف فندق قريب من هنا؟	هل يمكنني أخذ فترة راحة في فندق بالقرب من هنا ؟	ممكن آخد بريك في فندق قريب من هنا؟
ممنوع التدخين في الاسانسير، لو سمحت .	ممنوع التدخين في المصعد من فضلك .	ممنوع التدخين في الأسانسير، لو سمحت.
في مراكب على شكل سفينة قرصان أو سفينة بخارية. وفي منهم شبه البجعة أو الحوت.	هناك قوارب على طراز سفن القرصان أو السفن القديمة أو مزودة بعجلات تجديف . البعض الآخر يشبه الإوز أو الحوت .	في قوارب زي سفن القراصنة أو السفن القديمة أو بعجل تجديف. والبعض يشبه الإوز أو الحوت.
لأ، بعدين، لو سمحت.	كلاً . فيما بعد ، من فضلك .	لا. بعدين، من فضلك.
هو إنت بتقول إن الأحسن نروح نشوف تمثال الحرية؟	هل تريد أن تقول أن تمثال الحرية يستحق الذهاب لمشاهدته ؟	عايز تقول إن تمثال الحرية يستاهل الزيارة؟
نتمنى انه بأستخدام الكومبيوترات الشخصية في ده بدل من اهمالهم حينشط عملية البيع فالوسائل التعليمية.	نأمل في زيادة مبيعات أجهزة الميكروكمبيوتر في منافذ البيع التعليمية من خلال ترسيخ استخدامها في هذا المجال المهمل .	بنأمل في زيادة مبيعات الميكروكمبيوتر في المنافذ التعليمية من خلال ترسيخ استخدامها في المجال ده.
غلطتي. مش غلطتك.	إنه خطئي . ليس خطأك .	دي غلطتي، مش غلطتك.
ممكن ناخد أوضة على البحر؟	هل نستطيع أن نأخذ غرفة تطل على المحيط ؟	ممكن ناخد أوضة تطل على المحيط؟
شعرعا متموج و اسود .	شعرها كان متموجا وأسودا .	شعرها كان متموج وأسود.
مش هاتلعب معايا تنس الاسبوع الجاي؟	ألن تلعب معي تنس الأسبوع المقبل ؟	مش هتلعب معايا تنس الأسبوع الجاي؟
أتحمست .	لقد أثيرت مشاعري .	مشاعري اتأثرت.
رصيف خمسة هناك.	إن الرصيف رقم خمسة يقع هناك .	الرصيف رقم 5 هناك.
هو فيه محل حلاقة؟	هل ثمة محل للحلاقة ؟	في محل حلاقة؟
حبعتلك صورة.	سأرسل لك صورة .	هبعت لك صورة.
تعالا، كينجي. خليني أفرجك ع المكتب.	تعالى ، كينجي . دعني أريك أرجاء المكتب .	تعال، كينجي. خليني أورّيك المكتب.
أنا شبعان، دلوقتي. لو ممكن، تجبهولي كمان ساعة ونص؟	معدتي ممتلئة الآن . هل يمكنك إحضارها بعد نصف ساعة ، إن ناسبك ذلك ؟	معدتي مليانة دلوقتي. ممكن تجيبها بعد نص ساعة، لو يناسبك؟
السوستة مكسورة. عندك زيها تانى؟	لقد كسر الزمام المنزلق . هل لديك مزيد من نفس النوع ؟	السوستة اتكسرت. عندك منها تاني؟
شريط فيلم كاميرا صور ملونه، من فضلك .	فيلم ملون شفاف , من فضلك .	فيلم ملون شفاف، لو سمحت.
ايه الحاجات الكويسة للبشرة الدهنية؟	ما نوع المنتجات التي تناسب البشرة الدهنية ؟	إيه نوع المنتجات اللي تناسب البشرة الدهنية؟
ممكن أستلف مفتاح للتواليت؟	هل يمكنني أن أستعير مفتاحاً للحمام ؟	ممكن أستعير مفتاح الحمام؟
فين بتخطط تتفسح في البلد ديه؟	ما الأماكن التي خططت لزيارتها في هذا البلد ؟	إيه الأماكن اللي مخطط تزورها في البلد ده؟
عايز سوسيس مع البصل، لو تكرمت .	أود شطيرة هوت دوج بالبصل ، من فضلك .	عايز ساندوتش هوت دوج بالبصل، لو سمحت.
أنا مابعرفش اتكلم إنجليزي.	لا أستطيع أن أتحدث الإنجليزية .	مش بعرف أتكلم إنجليزي.
هو بيطلع كل عشر دقايق.	إنه يغادر كل عشرة دقائق .	بيطلع كل عشر دقايق.
ممكن تجيبلي الفاتورة؟	هل يمكنك أن تحضر لي الفاتورة ؟	ممكن تجيب لي الفاتورة؟
عايز سماعات راس، إذا سمحت .	أريد بعض السماعات ، من فضلك .	عايز شوية سماعات، لو سمحت.
هو كلنا هنروح ندخل في نفس الوقت؟	هل كلنا سندخل في نفس الوقت ؟	كلنا هندخل في نفس الوقت؟
كم معدل التضخم؟	ما هو معدل التضخم ؟	إيه نسبة التضخم؟
شيال .	أيها الحمال .	يا شيلل.
معدل ضرباته تلتميه خمسه و عشرين .	لديه متوسط لضرب الكرة يبلغ ثلاثة خمسة وعشرين .	متوسط ضرب الكرة عنده 325.
هو فيه مرشد بيتكلم ياباني؟	هل هناك من مرشد يتحدث اليابانية ؟	في مرشد بيتكلم ياباني؟
أعذرني، بقالك مده كبيرة شغال هنا؟	معذرة ، هلا كنت تعمل هنا منذ فترة طويلة ؟	معلش، بقالك فترة طويلة شغال هنا؟
أجبلك حاجة تشربها؟	هل أحضر لك شيئاً تشربه ؟	أجيب لك حاجة تشربها؟
احنا متأخرين شويه، بس ما تقلقش .	نحن متأخرين قليلاً ، لكن لا تقلق .	احنا متأخرين شوية، بس ما تقلقش.
ايدي كانت مجروحة.	لقد جُرحت يدي .	إيدي اتجرحت.
ممكن تجيبلي مقاس اكبر؟	هل يمكن أن تحضر لي حجماً أكبر ؟	ممكن تجيب لي حجم أكبر؟
إزاي أقدر آخد الحوالة؟	كيف يمكنني الحصول إلى العائد ؟	إزاي أقدر أوصل للعائد؟
ده متصنع آلي ولا يدوي؟	هل هذا مصنوع آليا أم يدويا ؟	ده مصنوع آلي ولا يدوي؟
عايز اشوف المباني التاريخية .	أريد مشاهدة مبانٍ تاريخية .	عايز أشوف مباني تاريخية.
اروح هناك ازاى؟	كيف أصل هناك ؟	إزاي أوصل هناك؟
فين ممكن ألاقي تذاكر طيران بسعر كويس؟	أين يمكنني الحصول على تذكرة رحلة بسعر معقول ؟	فين أقدر أجيب تذكرة رحلة بسعر معقول؟
مكانين من اللي بعشرة دولار، لو سمحت.	مقعدان من فئة العشر دولارات من فضلك .	مقعدين بفئة العشرة دولار، من فضلك.
حأبلغ ده للشرطة .	سوف أبلغ الشرطة بذلك .	هبلغ الشرطة بكده.
هاخد تلتمية جرام من ده.	سآخذ ثلاثمائة جرام من هذا .	هاخد 300 جرام من ده.
مبروك، سمعت إنك إشتغلت في شركة إي بي سي.	مبروك ، لقد سمعت أنك حصلت على وظيفة لدي شركة إيه بي سي .	مبروك، سمعت إنك اتوظفت في شركة ABC.
بأحب الشكل ده، أذا سمحت.	أريد هذا النوع من فضلك .	عايز النوع ده، لو سمحت.
اتفضل الباقي، يا أفندم.	إليك الفكة ، يا سيدي .	اتفضل الفكة، يا أستاذ.
دي المرة الأولى ليا.	هذه هي أول مرة .	دي أول مرة.
عايز ازوده على فاتورة الاوضه .	أود إضافة هذا إلى رسوم غرفتي .	عايز أضيف ده على حساب الأوضة.
انا عايز اللي انتو حاطينه في العرض .	أريد تلك المعروضة في نافذة العرض .	عايز اللي معروضة في الفاترينة.
لأ، ماحصلش . ممكن اشوف واحده تانية؟	لا ، لا أريد . هل أرى واحدة أخرى ؟	لا، مش عايز. ممكن أشوف واحدة تانية؟
الركود الاقتصادي أثر أزاى على التجارة؟	كيف أثر الركود على الشركة ؟	الركود أثر إزاي على الشركة؟
شكرا إنك أخدتني من المطار. إنت طيب أوي.	شكراً لأنك أتيت لتأخذني من المطار . أنت لطيف جداً .	شكراً إنك جيت تاخدني من المطار. أنت لطيف جداً.
عايز أخد هديه تذكارية لأبني .	ارغب في هدية تذكارية لابني .	عايز هدية تذكارية لابني.
فين ممكن ألاقي مكان جميل لرحلة لمدة يوم احد؟	أين يوجد مكان لطيف لقضاء نزهة ليوم واحد ؟	فين مكان حلو نقضي فيه يوم نزهة؟
ده ايصال ايه؟	ماذا تخص هذه الفاتورة ؟	الفاتورة دي بتاعة إيه؟
عايز أشوف جراح.	أود زيارة جراح .	عايز أزور جراح.
لأ، بس احنا عندنا عربيه جديدة لانج صغيرة . الحمرا اللي هناك .	لا ، ولكن لدينا سيارة جديدة صغيرة كبديل . الحمراء هناك .	لا، بس عندنا عربية جديدة صغيرة بديل. الحمراء هناك.
أنا كويس، متشكر.	إنني في حالة جيدة ، شكراً لك .	أنا في حالة كويسة، شكراً.
هاتقولي ايه المحطة اللي قبل نيويورك؟	من فضلك ما هي المحطة التي قبل نيويورك ؟	من فضلك إيه المحطة اللي قبل نيويورك؟
حنكمل بحث و لما حنلاقية، حنخليك تعرف .	سنواصل البحث ، وحينما نعثر عليها سنقوم بإبلاغك .	هنكمل البحث، ولما نلاقيها هنبقى نبلغك.
باتكلم بدقة، مئات الالاف منهم، يا استاذ كوريو، في السرداب ده بس بنشيل تمنميت الف قزازة .	لنتحدث بدقة , مئات الآلاف منها ، سيد كوريو . في هذا القبو وحده يوجد لدينا حوالي ثمانمائة ألف زجاجة .	نتكلم بدقة، مئات الآلاف منها، يا سيد كوريو. في القبو ده لوحده عندنا حوالي 800 ألف زجاجة.
أنهي باص بيروح محطة القطر؟	أي أتوبيس يتوجه إلى المحطة المركزية ؟	أي أتوبيس بيروح المحطة المركزية؟
قريت اى كتب كويسه قريب؟	هل قرأت أية كتب جيدة حديثاً ؟	قرأت أي كتب كويسة مؤخراً؟
بالمناسبه، هي محلات الاقسام المتعددة بتقبل الشيكات السياحية؟	بالمناسبة ، هل تقبل المتاجر متعددة الأقسام الشيكات السياحية ؟	بالمناسبة، المتاجر الكبيرة بتقبل الشيكات السياحية؟
ملح، من فضلك .	الملح من فضلك .	الملح، من فضلك.
أوه، اظاهر إني لازم أضيع حاجة في كل مرة وأنا مسافر.	أوه ، يبدو أنني افقد شيء ما كل وقت أسافر فيه .	آه، شكلي بضيع حاجة كل مرة بسافر فيها.
حوالي تلاته و نص مليون ين .	حوالي ثلاثة ملايين ونصف المليون ين .	حوالي 3 مليون ونص ين.
ايه أسقع في الشتا، اليابان ولا أوستراليا؟	أيهما أكثر برودة في الشتاء , اليابان أم استراليا ؟	مين فيهم أبرد في الشتاء، اليابان ولا أستراليا؟
ساعات بطني بتوجعني.	تؤلمني معدتي أحياناً .	بطني بتوجعني أحياناً.
حتقعد مده طويلة في نيويورك؟	هل ستقيم في نيويورك طويلاً ؟	هتقعد في نيويورك كتير؟
الجو حر بفظاعة، النهاردة . خلينا ننزل البحر، يالا؟	إن الطقس حار للغاية , اليوم فلنذهب للسباحة , هل سنعمل ذلك ؟	الجو حر قوي النهارده، نروح نسبح؟
فين السلالم؟	أين السلم ؟	فين السلم؟
أعذرني دقيقة .	عذراً لحظة .	لحظة، من فضلك.
المطعم موجود هناك.	المطعم هناك .	المطعم هناك.
لازم اسافر على طيارة ايه دبليو واحد زيرو زيرو . ينفع؟	يجب أن أنتقل إلى عربة مكيفة واحد صفر صفر . هل هذا ممكن ؟	لازم أنتقل لعربة مكيفة 100. ممكن؟
عمري ما سمعت عن العنوان ده هنا .	لم اسمع بهذا العنوان من قبل بالقرب من هنا .	ما سمعتش عن العنوان ده قبل كده، في قريب من هنا؟
دي كانت أكتر أكلة لذيذة.	كانت أشهى وجبة .	دي كانت أطعم وجبة.
ده ضيق جدا .	إنها ضيقة جدا .	دي ضيقة جداً.
مساء الخير، عندي معاد مع دكتور دريل الساعة تلاتة النهاردة، بس للأسف هاتأخر شوية. ده هايكون اوكيه؟	مساء الخير . عندي ميعاد مع السيد دريل في الساعة الثالثة اليوم ، لكن أخشى أني سوف أتأخر قليلا . هل هذا سيكون على ما يرام ؟	مساء الخير. عندي ميعاد مع الأستاذ دريل الساعة 3 النهارده، بس خايف أتأخر شوية. هينفع؟
طلاب المدارس الثانوي الامريكي مش ضروري يذاكرو جامد .	طلاب الثانوي بالمدارس الأمريكية ليس عليهم أن يذاكروا بجد .	طلاب الثانوي في المدارس الأمريكية مش لازم يذاكروا بجد.
ده لطف منك إنك تسبنى افضل هنا.	إنه لكرم منك أن تدعني أمكث هنا .	كرم منك إنك تخليني أقعد هنا.
عايز أبعت ده بالبريد الجوي.	أريد إرسال ذلك بالبريد الجوي .	عايز أبعت ده بالبريد الجوي.
مكتبي هنا . و دي ان باتلر، السكرتيرة بتاعتي. آن، ده مستر أوزو من اوساكا .	مكتبي هنا في الأعلى . أقدم لك سكرتيرتي آن باتلر . آن ، أقدم لك السيد أوزو من أوساكا .	مكتبي هنا فوق. أعرفك على سكرتيرتي آن باتلر. آن، أعرفك على الأستاذ أوزو من أوساكا.
سامحني؟ الكلام وقع مني . ممكن تتكلم بشويش شويهعلشان اقدر افهم؟	معذرة ؟ لم أتابعك . هل يمكنك التحدث اكثر بطأ حتى يتسنى لي فهمك ؟	معلش؟ ما فهمتش. ممكن تتكلم أبطأ عشان أفهمك؟
لحظة، من فضلك. يافندم، للاسف هو استاذ اوكاوا راح يتغدى. تحب اسبله رسالة؟	لحظة من فضلك . أخشى يا سيدي أن السيد أوكاوا قد ذهب لتناول الغداء . هل تريد ترك رسالة له ؟	لحظة من فضلك. خايف يا أستاذ إن السيد أوكاوا راح يتغدى. عايز تسيب له رسالة؟
اسف، ما أفدرش .	آسف , لا أستطيع .	آسف، مش هقدر.
انا مش فكر فين .	لا أتذكر أين .	مش فاكر فين.
عايز اعرف مقاس رقبتي .	أريد أن أعرف مقاس رقبتي .	عايز أعرف مقاس رقبتي.
يكلفني كام التاكسي من هنا للمحطة؟	كم أجرة التاكسي من هذا الفندق إلى المحطة ؟	كام أجرة التاكسي من الفندق ده للمحطة؟
الأوضة دي صغيرة أوي.	هذه الغرفة صغيرة جداً .	الأوضة دي صغيرة جداً.
ممكن آخد طوابع بريد؟	هل يمكنني الحصول على بطاقات بريدية ؟	ممكن أجيب بطاقات بريدية؟
عايز مكان أعرف آخد فيه أطباق محلية.	أود أن اذهب إلى مكان ما يمكنني أن أتتناول فيه بعض الطعام المحلي .	عايز أروح مكان أقدر آكل فيه أكل محلي.
ودلوقتي . ممكن تديني فلوس عشان اشتري شويه حاجات مهمه.	في الوقت الحالي . هل تستطيع أن تعطيني بعض النقود حتى أستطيع شراء بعض الأشياء الضرورية .	دلوقتي. ممكن تديني شوية فلوس عشان أشتري حاجات ضرورية؟
إنت ينفع تاخد أسانسير رقم واحد أو رقم اتنين.	يمكنك ركوب المصعد رقم واحد أو المصعد رقم اثنان .	ممكن تركب الأسانسير رقم 1 أو رقم 2.
ياخد وقت أد إيه عشان اوصل المطار؟	كم المدة يستغرقها الوصول إلى المطار ؟	هتاخد وقت قد إيه عشان نوصل للمطار؟
قصقصة بس، من فضلك .	مجرد زخرفة ، من فضلك .	مجرد زخرفة، لو سمحت.
ليه القطر اتأخر كده؟	لماذا تأخر القطار كثيراً ؟	ليه القطر اتأخر كتير؟
نزله عند بيج هوتيل، لو سمحت.	أنزله عند فندق بيج ، من فضلك .	نزله عند فندق بيج، من فضلك.
عندي حمى القش.	أعاني من حمى القش .	بعاني من حمى القش.
طيب، اى نوع من الاكل انت بتحبة؟	حسن ، ما نوع الطعام الذي تحب ؟	طيب، إيه نوع الأكل اللي بتحبه؟
تلات مرات .	ثلاث مرات .	ثلاث مرات.
لو كنت مكانك كنت صدقت.	كنت سأشتري هذا إن كنت في مكانك ؟	كنت هشتري ده لو كنت مكانك؟
الرقم واحد اتنين تلاته اربعة خمسه سته سبعة تمانية .	الرقم هو واحد اثنين ثلاثة أربعة خمسة ستة سبعة ثمانية .	الرقم هو واحد اثنين ثلاثة أربعة خمسة ستة سبعة تمانية.
اسف، مش حاببه .	آسف , إنها لا تروق لي .	آسف، مش عاجباني.
دول إكسسوارات كاميرا. دول ضعاف خالص.	إنها عبارة عن مستلزمات آلات تصوير . إنها سهلة الكسر جدا .	دي مستلزمات كاميرات. بتتكسر بسهولة جداً.
هو ممكن أروح فين علشان آخده؟	أي الأماكن أتوجه إليها للحصول عليها ؟	فين الأماكن اللي أروحها عشان أجيبها؟
أول قطر إمتى؟	ما ميعاد أول قطار ؟	أول قطر بيمشي إمتى؟
هو قال "خلينا نحتفل" و اخدني عالبار . قال انه حيروح يعمل مكالمة تليفون و مشي و مارجعش تاني و اتدبست انا في فاتورة كبيرة.	دعونا نحتفل ، هكذا قال وآخذني إلى بار . وقال إنه سيُجري مكالمة هاتفية وغادر ولم يعد أبداً وتحملت أنا وحدي عبء فاتورة ضخمة .	قال خلينا نحتفل، وأخذني على بار. قال إنه هيعمل مكالمة وخرج وما رجعش أبداً وأنا اتحملت الفاتورة الكبيرة لوحدي.
حاديهولك مخصوص عشانك بميتين و تلاتين دولار، هاه .	سأعطيها لك خصيصا مقابل مائتين وثلاثين دولارا , إذن .	هديها لك مخصوص بـ 230 دولار، طيب.
ادي فاتورتك .	إليك فاتورتك .	اتفضل فاتورتك.
الحرب الباردة استمرت لمدة أربع سنين ونص، من الف تسعمية واحد واربعين ل خمسة واربعين، ابتدت سنتين بعد الحرب العالمية التانية.	استمرت حرب الباسيفيك لمدة أربعة سنوات ونصف ، من ألف وتسعمائة وواحد وأربعون إلى خمسة وأربعون ، و قد اندلعت بعد الحرب العالمية الثانية بعامين .	حرب الباسيفيك استمرت أربع سنين ونص، من 1941 لغاية 1945، واندلعت بعد الحرب العالمية الثانية بسنتين.
اتعودت اشرب سجاير كل يوم .	لقد اعتدت أن أدخّن كلّ يوم .	كنت متعود أدخن كل يوم.
عايزين نحجز اربع ليالي من اول اغسطس .	نرغب في أن نقيم أربع ليالي بدءاً من أول أغسطس .	عايزين نقعد أربع ليالي من أول أغسطس.
أنا آسف، بس كل الأماكن محجوزة الليلة دي.	آسف ، سيكون منزلنا شديد الازدحام هذه الليلة .	آسف، بيتنا هيكون زحمة جداً الليلة.
أنا بدور على حاجة عليها علامة برادا الحديد.	أبحث عن شئ ما بعلامة برادا المعدنية .	بدور على حاجة بعلامة برادا المعدنية.
ممكن أطلب مرشد بيتكلم ياباني؟	هل يمكنني استئجار مرشداً يتحدث اللغة اليابانية ؟	ممكن أستأجر مرشد بيتكلم ياباني؟
هو رقم الكرسى ده اتنده عليه؟	هل نودي على رقم هذا المقعد ؟	نادوا على رقم الكرسي ده؟
إيه ده، لو سمحت؟	ما هذا من فضلك ؟	ده إيه من فضلك؟
ستميت دولار كل شهر بالاضافة شهر مقدم و شهر كمان رسوم السمسرة .	ستمائة دولار كل شهر بالإضافة إلى شهر مقدم وقيمة شهر آخر قيمة سمسرتنا .	600 دولار كل شهر، ومعاهم شهر مقدم وشهر تاني قيمة سمسرة.
منين أقدر أشتري شريحة تليفون؟	من أين يمكنني شراء بطاقة هاتف ؟	من فين ممكن أشتري كارت تليفون؟
من فضلك سيبني افكر دقيقة .	فضلاً دعني أفكر لحظة .	من فضلك، خليني أفكر لحظة.
انا كمان زيه، من فضلك .	الشيء نفسه لي ، من فضلك .	نفس الحاجة لي، من فضلك.
ياه، هوه ده اللى عايز اعمله دلوقتى. واحد، إتنين، انام.	آه ، هذا ما أريد أن أقوم به الآن . واحد , اثنان ، نم .	آه، ده اللي عايز أعمله دلوقتي. واحد، اتنين، نام.
حأعرفك على طبيب الاسرة .	سأقدمك لطبيب أسرتي .	هعرفك على دكتور العيلة بتاعتنا.
ده عنوان التواصل معايا.	هذا هو العنوان الذي يمكن الاتصال بي فيه .	ده العنوان اللي تقدر تتواصل معايا فيه.
ترشحللي محل كويس علشان اشتري شنط جلد؟	هل يمكنك أن تزكي بمحل جيد لشراء حقائب جلدية ؟	ممكن ترشح محل كويس لشراء شنط جلد؟
بكام ده شامل الضريبة؟	كم سعر هذا متضمناً الضريبة ؟	بكام ده شامل الضريبة؟
إحنا عايزين نروح جبل جروس نتزحلق عالجليد. إنت رتبت مواصلات؟	نود أن نذهب إلى جبل جروس للتزلج . هل من الممكن أن تجهز وسيلة انتقال ؟	عايزين نروح جبل جروس للتزلج. ممكن تجهز لنا وسيلة نقل؟
عظيم .	عظيم .	عظيم.
تمام، حوالي خمستاشر دقيقة مشي .	حسناً ، حوالي خمسة عشرة دقيقة سيراً على الأقدام .	تمام، حوالي 15 دقيقة مشي.
الدخول يتكلف كام؟	كم تبلغ تكلفة الدخول ؟	الدخول بكام؟
انا راجع لليابان الاتنين الجاي .	سأعود إلى اليابان الاثنين المقبل .	هارجع اليابان الاثنين الجاي.
عايز ارجع لفندق جراند .	أودّ العودة إلى فندق " جراند أوتيل " .	عايز أرجع لفندق "جراند أوتيل".
خدني لفندق الفور سيزون، من فضلك .	من فضلك , خذني إلى فندق فور سيزونز .	من فضلك، خدني لفندق فور سيزونز.
الساعة دلوقتي عشرة . أتفضل مفتاح أوضتك، رقمها خمسة و اربعين الدور التالت و التلاتين . الشيال حيطلعلك شنطك .	الساعة العاشرة . هذا مفتاح غرفتك . غرفتك رقم أربعة وخمسون ثلاثة وثلاثون . الخادم سيأخذ حقائبك إلى أعلى .	الساعة عشرة. ده مفتاح أوضتك. أوضتك رقم 5433. الخادم هيطلع شنطك لفوق.
من هنا، من فضلك . السادس او السابع في الصف ده .	هذا الطريق , من فضلك . السادس والسابع من هذا الصف .	الطريق ده، من فضلك. السادس والسابع من الصف ده.
فيه حاجة غلط في البطارية .	شئ ما خطأ فى البطارية .	في حاجة غلط في البطارية.
المفروض أسيب بقشيش أد إيه؟	كم أدفع كبقشيش ؟	أدفع كام بقشيش؟
ممكن اتنقل لكرسي فاضي تاني؟ انا مش قدر اشوف الفيلم كويس من الكرسي بتاعي .	هل لي أن أنتقل إلى مقعد شاغر آخر ؟ فلا يمكنني أن أرى شاشة العرض جيداً من خلال مقعدي هذا .	ممكن أبدل لمقعد فاضي تاني؟ مش شايف شاشة العرض كويس من مكاني.
عايز فنجان قهوه كمان .	أود تناول فنجاناً آخر من القهوة .	عايز فنجان قهوة تاني.
ده مش كوبون، ده وصل التسجيل .	هذا ليس كوبون إنه إيصال تسجيل .	ده مش كوبون، ده إيصال تسجيل.
اسمى كامى. انا عندى حجز هنا ليلتين.	اسمي كامي . لدي حجز هنا لمدة ليلتين .	اسمي كامي. عندي حجز هنا ليلتين.
ايوه، بأتمنى ارجع اليابان و اشتغل في وظيفة كويسة في واحد من البنوك الكبيرة .	حسنا , أتمنى أن أرجع إلى اليابان وأحصل على وظيفة جيدة في أحد البنوك الرائدة .	تمام، بتمنى أرجع اليابان وألاقي شغل كويس في أحد البنوك الكبيرة.
اوه، كويس، كده عندنا وقت كتير .	آه ، رائع . لدينا الكثير من الوقت إذاًً .	آه، حلو. عندنا وقت كتير كده.
عايز أغير طلبي .	أريد أن أغير طلبي .	عايز أغير طلبي.
دقيقة واحده، من فضلك .	لحظة من فضلك .	لحظة، من فضلك.
عايز كاميرا عادية، إذا سمحت .	أريد كاميرا بسيطة من فضلك .	عايز كاميرا بسيطة، من فضلك.
أكل مكسيكي .	طعام مكسيكي .	أكل مكسيكي.
ممكن يكون تلاتة وخمسة مايو أجازات محلية. عشان كدة قررنا نعمل تلات أيام متتابعة أجازات بإضافة يوم رابع.	يتصادف أن يكون الثالث والخامس من مايو أعياد قومية . لذلك قررنا أن نجعل ثلاثة أيام عطلات بإضافة الرابع من مايو .	الثالث والخامس من مايو بيصادف أعياد قومية. قررنا نخليها ثلاثة أيام عطلة بإضافة الرابع من مايو.
أوكي. يلا اشوفك هناك.	حسنا ، إلى اللقاء إذن .	تمام، مع السلامة.
أحسن تقعد وتاخد نفسك بعد رحلتك الطويلة من اليابان.	من الأفضل أن تجلس وتلتقط أنفاسك بعد رحلتك الطويلة من اليابان .	الأفضل تقعد وتاخد نفسك بعد رحلتك الطويلة من اليابان.
عايز أصرف الشيك .	أود أن أصرف الشيك .	عايز أصرف الشيك.
بكرة؟ مش حأعمل حاجة لحد بعد الضهر . لكن ليه؟	غداً ؟ لن أقوم بأي شيء طوال فترة بعد الظهر . لكن ما السبب ؟	بكرة؟ مش هعمل حاجة طول فترة بعد الظهر. بس ليه؟
طبق المحار بتاعنا خفيف نوعا ما.	طبق المحار الخاص بنا خفيف إلى حد ما .	طبق المحار بتاعنا خفيف شوية.
حأفرجك المكان .	سأريك في المكان حولنا .	هوريك المكان حوالينا.
اوه، أنا آسف جدا.	معذرة !	معلش!
فين مكان استلام الشنط؟	أين ورقة المطالبة بالحقائب ؟	فين ورقة استلام الشنط؟
أنا حرشح ده.	أوصي بذلك .	بنصح بكده.
اظن كده .	أعتقد ذلك .	أعتقد كده.
كويس، الأول لازم أروح لمركز المعلومات وأدور على فندق.	حسنا , أولا يجب أن أتوجه إلى مركز الاستعلامات و أبحث عن فندق .	طيب، الأول لازم أروح مركز الاستعلامات وأدور على فندق.
الكراسي الأقرب بكام؟	بكم اقرب المقاعد ؟	أقرب المقاعد بكام؟
وريني بلوفرات مناسبه مع ده .	أرني بعض السترات التي تتناسب مع هذا .	وريني شوية جاكتات تنفع مع ده.
النبيد لذيذ قوي، ده معمول هنا؟	خمر لذيذ المذاق . هل هو صناعة محلية ؟	نبيذ طعمه حلو. ده إنتاج محلي؟
انا ما حجزتش كرسي لرحة العوده لحد دلوقتي .	لم أحجز مقعداً لرحلة عودتي بعد .	ما حجزتش مقعد لرحلة الرجوع بتاعتي لسه.
انا عندي تمان سنين.	أبلغ من العمر ثمانية أعوام .	عندي تمان سنين.
شكل التواليت مسدود .	يبدو أن المرحاض مسدود .	شكل التواليت مسدود.
تمام، الوقت اتأخر شوية. بيتهيألي لازم أمشي دلوقت. شكرا ليك جدا ع الليلة الرائعة.	حسنا , الوقت متأخر إلى حد ما . أعتقد أنني يجب على أن أغادر الآن . شكرا جزيلا لك على الأمسية الرائعة .	تمام، الوقت متأخر شوية. أعتقد لازم أمشي دلوقتي. شكراً جداً على الأمسية الجميلة.
عندك طوابع تذكارية؟	هل لديك أية طوابع تذكارية ؟	عندك أي طوابع تذكارية؟
إيه ده، بجد؟ أخد اي حاجة؟	آه ، حقا ؟ هل أخذ أي شيء ؟	آه، بجد؟ خد حاجة؟
اتفضل كرسي، إذا سمحت .	اجلس , من فضلك .	اقعد، من فضلك.
أنزل فين عشان أروح المتحف؟	أين أنزل لكي أصل إلى المتحف ؟	أنزل فين عشان أوصل للمتحف؟
ممكن توريني انا اقدر فين استبدل عمله؟	هلا أخبرتني عن مكان لتغيير النقود ؟	ممكن تقولي فين أغير الفلوس؟
كسرت الزهرية و انا مش قاصد .	لقد كسرت الزهرية بسبيل الخطأ .	كسرت الفازة بالغلط.
عاوز شاي، من فضلك .	أريد شاي من فضلك .	عايز شاي، من فضلك.
امتى حيفتح و امتى حيقفل؟	متى تفتح ومتى تقفل ؟	بتفتح وبتقفل إمتى؟
هل آوصل رسالة معينة؟	هلاّ أعطيتني رسالة ؟	ممكن تديني رسالة؟
معلقة تانية، لو سمحت.	ملعقة أخرى , من فضلك .	معلقة تانية، من فضلك.
عاوز كرسي كويس.	أريد مقعداً جيداً .	عايز كرسي كويس.
اديني اتجاهات.	أعطني تعليمات .	اديني تعليمات.
انا طلبت اتنين كاكولا من خمسين دقيقة . وصلو لحد فين؟	أنا طلبت اثنين من الكوكا منذ خمسين دقيقة . كيف تأتي ؟	طلبت اتنين كوكا من خمسين دقيقة. فين الطلب؟
ممكن تحجزلنا تذكرتين؟	أيمكنك الحصول على تذكرتين لنا ؟	ممكن تجيب لنا تذكرتين؟
عايز أرجع.	أشعر بالغثيان .	حاسس بغثيان.
ينفع أغير حجري دلوقتي؟	هل من الممكن تغيير حجزي الآن ؟	ممكن أغير حجزي دلوقتي؟
ممكن تقكر ايه اللي ممكن اقولهوله؟	هل يمكنك أن تفكر فيما يجب على أن أقول له ؟	ممكن تفكر تقول له إيه؟
آخر أتوبيس بيطلع إمتى؟	متي يغادر آخر أتوبيس ؟	آخر أتوبيس بيمشي إمتى؟
في الحالة ديه، انت مش مضطر تملا النموذج ده .	في هذه الحالة ، لا يتعين عليك أن تملأ واحدة .	في الحالة دي، مش لازم تملأ واحدة.
من فضلك اديني شوية فكة.	من فضلك أعطني بعض النقود الفكة .	من فضلك اديني شوية فكة.
أحتياطي، خلي معايا رقم الشخص المسئول .	لقط للتأكيد ، إعطني رقم المسئول .	للتأكيد، اديني رقم المسئول.
أعذرني . احنا سألنا تلات مرات على مشروباتنا .	معذرة ، لقد طلبنا ثلاث مرات لإحضار مشروباتنا .	معلش، طلبنا ثلاث مرات مشروباتنا.
اتوبيس ايه يوصلني لفندق سكايواي؟	أية حافلة يجب أن تـقلني إلى فندق سكاي واي ؟	أي أتوبيس يوصلني لفندق سكاي واي؟
مادام خمستاشر دقيقة بس من المحطة، خلاص هامشي.	لو إن المسافة خمسة عشرة دقيقة فقط من المحطة ، إذن سأمشيها .	لو المسافة 15 دقيقة بس من المحطة، هروحها مشي.
بالتأكيد . نقدر نخدمك أزاي؟	بالتأكيد . كيف يمكننا خدمتك ؟	أكيد. إزاي نقدر نخدمك؟
ممكن اشوف جدول المواعيد؟	هل يمكن أن أرى الجدول ؟	ممكن أشوف الجدول؟
خلينا ناخد بريك. محتاج قهوة؟	لنأخذ فترة راحة . هل تريد قهوة ؟	نرتاح شوية. عايز قهوة؟
ممكن تديني مسكن؟	هل ستعطني مسكن للآلام ؟	هتديني مسكن للألم؟
عايز سيشوار.	أريد مجفف .	عايز مجفف شعر.
ممكن أشوف تذكرتك؟	هل لي أن أرى تذكرتك ؟	ممكن أشوف تذكرتك؟
تكلفة الاوضة أغلى من اللي بلغوني بيه .	مصاريف الغرفة أغلى مما أُخبرت .	تكاليف الأوضة أغلى من اللي قالولي.
امتى حتوصل طيارة روما؟	متى ستصل الطائرة إلى روما ؟	الطيارة هتوصل روما إمتى؟
اد ايه رائع .	إنها رائعة .	دي جميلة جداً.
ممكن تدفع عشرة دولار تحت الحساب؟	هل من الممكن أن تدفع مبلغ عشرة دولارات للمقدم ؟	ممكن تدفع 10 دولارات مقدم؟
فيه حاجة غلط في مكنة البيع ديه .	ثمة شئ خطأ في آلة التهوية هذه .	في حاجة غلط في مروحة التهوية دي.
عايز كيرلي واسع، من فضلك.	أريد عمل تمويجا لشعري ليكون طليقا .	عايز أعمل تمويج لشعري يبقى مفكوك.
تمام . مش وحشه .	حسنا . إنه ليس سيئاً للغاية .	تمام. مش وحش قوي.
فيه جولة سياحية صباحية؟	هل توجد أية جولة صباحية ؟	في أي جولة صباحية؟
عندنا مشكلة.	لدينا مشكلة .	عندنا مشكلة.
ده للأعضاء بس؟	هل هذا للأعضاء فقط ؟	ده للأعضاء بس؟
فيه حاجه جايبها معاك تحب تقول عنها؟	أي شيء لتعلنه ؟	في أي حاجة تعلنها؟
ايه اقرب سوبرماركت؟	أين يقع أقرب سوبر ماركت ؟	فين أقرب سوبر ماركت؟
عايز اسلم العربية في سان فرانسيسكو .	أود أن أترجل من السيارة في سان فرانسيسكو .	عايز أنزل من العربية في سان فرانسيسكو.
بترشح مكان زى كده؟	هل بمقدورك أن تُوصي بمكان مثل ذلك ؟	ممكن ترشح مكان زي ده؟
ايوه . تمانين جنيه في الليله، زائد الضريبة .	نعم . ثمانون جنيهاً في الليلة ، زائد الضريبية .	أيوة. 80 جنيه في الليلة، زائد الضريبة.
كان فيه قد إيه؟	كم كان ثمنها ؟	كانت بكام؟
ممكن نور، من فضلك؟	هل يمكنني الحصول على مصباح ، من فضلك ؟	ممكن تجيب لي لمبة، لو سمحت؟
عايز أبعت جواب اليابان.	أريد إرسال خطاب لليابان .	عايز أبعت خطاب لليابان.
مش عارف أنام من الوجع.	لا أستطيع النوم من الألم .	مش قادر أنام من الألم.
انا في نفس السن .	إنني في نفس السن .	أنا في نفس العمر.
ممكن تقوللي أماكن حلوة اروح أشوفها في البلد دي؟	هل ستقول لي عن أماكن مشوقة لأذهب لرؤيتها في هذه المدينة ؟	ممكن تقولي عن أماكن حلوة أروح أشوفها في المدينة دي؟
حأرجع و اكلمك بعدين .	سأعاود الاتصال بك فيما بعد .	هكلمك بعدين.
ليه ما نقدرش نتغدى سوا، بكرة؟	لماذا لا نتقابل سويا على وجبة الغداء غداً ؟	ليه ما نتقابلش على الغدا بكرة؟
لما توصل، حندفع علشان نشحنه لبيتك .	لدي وصولها ، سوف ندفع ثمن شحنها إلى عنوان منزلك .	لما توصل، هندفع تكاليف شحنها لعنوان بيتك.
لازم الحق طيارة لوس أنجلوس بكرة الصبح بدري .	علي أن ألحق طائرة متجهة للوس أنجليس باكر صباح غد .	لازم ألحق طيارة رايحة لوس أنجليس بكرة الصبح بدري.
أنا محتاج باسبوري.	أريد جواز سفري .	عايز جواز سفري.
المسيحية كانت ممنوعة والبلد كانت منغزلة عن بقيتة العالم.	حظرت المسيحية وأغلقت البلاد بالنسبة لبقية العالم .	حظروا المسيحية وقفلوا البلد لباقي العالم.
أماكن تكون قريبة قدر الإمكان، لو سمحت.	مقاعد متقاربة من بعضها قدر الإمكان ، من فضلك .	مقاعد قريبة من بعض على قد ما تقدر، لو سمحت.
هو لازم أرجع أأكد حجزي؟	هل يتعين علىّ أن أعيد تأكيد حجزي ؟	لازم أعيد تأكيد حجزي؟
بحسب كلام جورو، مستر يامادا عنده عيلين .	حسبما يقول جورو ، فاللسيد يامادا طفلان .	حسب كلام جورو، السيد يامادا عنده طفلين.
عندكم اوضه بسرير واحد النهاردة؟	هل لديك غرفة فردية الليلة ؟	عندك أوضة فردية الليلة؟
ممكن تبدلي الجزمة البوت ديه بأصغر؟	هل يمكن أن تغير هذا الحذاء عالي الساق بآخر أصغر ؟	ممكن تغير الحذاء العالي ده بواحد أصغر؟
ريحته حلوة قوي . تمنه كام؟	رائحته جميلة . كم ثمنه ؟	ريحته حلوة. بكام ده؟
اظن ان رجلي اتكسرت .	أعتقد أن قدمي كسرت .	أعتقد إن رجلي اتكسرت.
عاجبني . حاخده .	تعجبني . سوف آخذها .	عجبتني. هاخدها.
ايوه، أهو .	نعم ، ها هي ذي .	أيوة، أهي.
فين منطقة التسوق في المدينة دي؟	أين الحي التجاري في هذه المدينة ؟	فين الحي التجاري في المدينة دي؟
لو مؤاخذه . فيه محل بيع كتب قريب من هنا؟	عذراً . هل يوجد محل كتب قريب من هنا ؟	معلش، في محل كتب قريب من هنا؟
انا مش قادر الاقي طريق المحطة .	لا يمكنني أن أجد الطريق إلى المحطة .	مش عارف ألاقي الطريق للمحطة.
رجلي بتوجعني.	قدمي تؤلمني .	رجلي بتوجعني.
تحب تاخد بالك من شطني؟	هلاّ اعتنيت بأمتعتي ؟	ممكن تهتم بشنطي؟
انا كنت حاجز من اربعة و عشرين أغسطس لسبعة و عشرين . ممكن أغير الحجز يبقى من خمسه و عشرين أغسطس لسبعه و عشرين ؟	أجريتُ حجزاً من أربعة وعشرين أغسطس إلى سبعة وعشرين . هل يمكنني تغيير حجزي من خمسة وعشرين أغسطس إلى سبعة وعشرين ؟	حجزت من 24 أغسطس لحد 27. ممكن أغير حجزي من 25 أغسطس لحد 27؟
عايز أجرب الشوز دي.	أريد أن أقيس هذا الحذاء .	عايز أقيس الحذاء ده.
هاظبط أن التربيزة اللي هناك.	سوف أعتني بهذه المائدة .	ههتم بالترابيزة دي.
عايز شيبسي .	أود بعضاً من رقائق البطاطس المقلية .	عايز شوية شبسي، من فضلك.
لو سمحت اكتب تقرير مفقودات عشان شنطي .	من فضلك سجل تقريراً بفقدان أمتعتي .	من فضلك اعمل تقرير بفقدان شنطي.
أخدت اخويا الاصغر لجنينه الحيوانات .	اصطحبت أخوتي الصغار إلى حديقة الحيوانات ؟	أخدت إخواتي الصغيرين لحديقة الحيوانات؟
مبسوط إني اتعرفت عليك.	أنا مسرور بلقائك .	مبسوط إني قابلتك.
انا حجزت عن طريق مكتب طوكيو، بس انا هعمل تشيك إن النهارده متأخر شويه.	أنا حجزت من خلال مكتب طوكيو . سوف أتأخر قليلاً في تسجيل اسمي هذه الليلة .	أنا حجزت من مكتب طوكيو. هتأخر شوية في تسجيل اسمي الليلة.
أنا بحب أروح للغوص.	أريد الغوص تحت الماء باستخدام أجهزة التنفس .	عايز أغوص تحت الماء بأجهزة التنفس.
انا مهتم بالشنطة الزرقا اللي عالشباك.	أنا معجب بالحقيبة الزرقاء الموجودة في شباك العرض .	معجب بالحقيبة الزرقاء اللي في الفاترينة.
أشكرك جدا . و سيب المكان زى ما هو .	شكراً جزيلاً . واترك هذا المنظر كما هو .	شكراً جزيلاً. وسيب المنظر زي ما هو.
فين مكان ممكن يكون في محلات ماركات؟	دلني على منطقة بها محلات لتصميم العلامات .	وريني منطقة فيها محلات لتصميم العلامات.
محفظتي اتسرقت في محل في السوق الحرة.	لقد سرق كيس نقودي في محل السلع المعفاة من الضرائب .	شنطة فلوسي اتسرقت في محل السلع المعفاة من الجمارك.
ده كان رائع .	كان بارداً .	كان بارد.
اسمك إيه، لو سمحت؟	ما اسمك من فضلك ؟	اسمك إيه، من فضلك؟
عند فندق هيلتون . أوضة تلاته زيرو خمسة .	في فندق هيلتون . رقم الغرفة هو ثلاثة صفر خمسة .	في فندق هيلتون. رقم الأوضة 305.
أنا اتسرقت تحت تهديد السلاح.	لقد تعرضت لعملية سلب .	اتعرضت لسرقة.
فيه اى مضيفة بتتكلم ياباني؟	هل هناك مضيفات يتحدثن اليابانية ؟	في مضيفات بيتكلموا ياباني؟
اطلع من المخرج ده و احود يمين، من فضلك .	خذ هذا المخرج هناك واستدر يمينا ، من فضلك .	خد المخرج ده ولف يمين
العملة دي بكام؟	كم سعر هذه العملة ؟	بكام العملة دي؟
فيه هايبر ماركت قريب من هنا؟	هل يوجد هنا محل متعدد الأقسام بالقرب من هنا .	في محل متعدد الأقسام قريب من هنا؟
عاوز أقرب ترابيزة، لو سمحت.	أريد أقرب منضدة من فضلك .	عايز أقرب ترابيزة، من فضلك.
تحب تاخد شوية مشروبات؟	هل تحب بعض المشروبات ؟	عايز تشرب حاجة؟
عاوز بيضتين عيون، لو سمحت.	أريد اثنين من الأومليت ، من فضلك .	عايز اثنين أومليت، لو سمحت.
فين الصيدلية؟	أين الصيدلية ؟	فين الصيدلية؟
إنت كنت رايح فين؟	إلى أين أنت متجه ؟	رايح فين؟
تونه مع الوسابي، من فضلك .	التونا " بالوسابي " ، لطفاً .	التونا بالوسابي، من فضلك.
ممكن أوصلة بالمترو؟	أيمكنني أن أذهب هناك بمترو الأنفاق ؟	ممكن أروح هناك بالمترو؟
معايا ميتين دولار كاش وألفين دولار في شيكات سياحية.	لدي مائتي دولارا نقدا و ألفي دولارا في شيكات سياحية .	معايا 200 دولار كاش و2000 دولار في شيكات سياحية.
ديه مش غلطتي .	هذا ليس خطئي .	دي مش غلطتي.
ست ورقت بعشرة دولار، تمانية ورقات دولار، و الباقي أربع .	ستة فواتير بقيمة عشرة دولارات وثمانية فواتير بقيمة دولارا واحدا والباقي أرباعا .	ست فواتير بعشرة دولار وتمانية فواتير بدولار والباقي أرباع.
كمان خمس ساعات و نص .	خمس ساعات وثلاثين دقيقة أخرى .	خمس ساعات ونص تاني.
السنة إتكسرت.	لقد انكسرت السنة .	السنة اتكسرت.
عايزك تعملي برنيطة جديدة .	أريد أن تصنع لي قبعة جديدة .	عايزك تعمل لي قبعة جديدة.
اه . .شابيزوكي واحشني.	آه لقد فقدت شبزوكي .	آه، ضيعت شبزوكي.
هتحوطلى علامة على الخريطة بتاعتى؟	هل لك أن تضع عليها علامة على خريطتي ؟	ممكن تحط علامة على الخريطة بتاعتي؟
انا متعور ومحتاج إسعاف.	أنا جريح وأحتاج لسيارة إسعاف .	أنا مصاب وبحتاج إسعاف.
ممكن تاخد طريق تاني و انت رايح و راجع ؟	هل من الممكن أن تأخذ طرق مختلفة للذهاب والعودة .	ممكن تاخد طرق مختلفة في الذهاب والعودة؟
عايز احجز ميعاد عالنهاردة خمسة العصر .	أود تحديد الموعد على أن يكون في الساعة الخامسة من مساء اليوم .	عايز أحدد الموعد الساعة خمسة مساءً النهارده.
افتكر انتو لسه اكلين دوناتس يا جماعة.	ظننت أنكم أيها الشباب تأكلون الكعك المخبوز فقط .	كنت فاكر إنكم يا شباب بتاكلوا الكعك المخبوز بس.
مش قادر اتحرك .	لا أستطيع التحرك .	مش قادر أتحرك.
فين كتاب الارشادات ده؟	أين هذا الدليل ؟	فين الدليل ده؟
دول صغيرين قوي .	يبدون في حجم صغير جداً .	شكلهم صغير جداً.
عندك من ده بس بلاتين؟	هل عندك هذا بلون رمادي معتدل ؟	عندك ده بلون رمادي فاتح؟
ممكن تملا استمارة التأمين الصحي دي، لو سمحت؟	هل يمكنك أن تملأ استمارة التأمين الصحي هذه ، من فضلك ؟	ممكن تملأ استمارة التأمين الصحي دي، لو سمحت؟
ممكن رقم تليفونك، إذا سمحت؟	هل لي برقم هاتفك ، من فضلك ؟	ممكن رقم تليفونك، من فضلك؟
عايز شنطة أرخص.	أريد حقيبة أرخص سعرا .	عايز شنطة أرخص.
ممكن تذكرو متعدده؟	هل أستطيع الحصول على تذكرة متعددة الاستخدام ؟	ممكن أجيب تذكرة متعددة الاستخدام؟
ايه اجدد لون في الموسم ده؟	ما هو أحدث لون هذا الموسم .	إيه أحدث لون في الموسم ده؟
ممكن تقولي الطريق لمحطة مترو الأنفاق؟	هل يمكن أن تدلني على الطريق إلى محطة المترو ؟	ممكن تدلني على طريق محطة المترو؟
اسف اني سبتك تستنى، انا حأطلع الاوضه معاك .	معذرة على انتظارك . سأصعد إلى غرفتك بصحبتك .	معلش على التأخير. هطلع أوضتك معاك.
عاوز شوية اربطة بتاعة جزم.	أحتاج بعض أربطة للحذاء .	محتاج شوية أربطة للحذاء.
ياخد وقت أد إيه عشان يوصل هناك؟	كم من الوقت يستغرق الوصول إلى هناك ؟	هياخد قد إيه نوصل هناك؟
مم، إيه الحاجات اللي في عاجباك في البلد دي؟	آه . ماذا أثار اهتمامك من خصائص معينة في هذا البلد ؟	آه. إيه اللي لفت انتباهك في البلد دي؟
عاوز مكوة.	أريد مكواة .	عايز مكواة.
ممكن تقولوي كود التليفون الدولي لليابان؟	هلا أخبرتني بالرقم الكودي للاتصال باليابان ؟	ممكن تقول لي كود الاتصال باليابان؟
إيه اللي في الأوبرا انهاردة؟	ما المعروض في الأوبرا الليلة ؟	إيه المعروض في الأوبرا الليلة؟
هو هنا كاسكيد ليميتيد؟	هل هذه شركة كاسيد ليمتد ؟	دي شركة كاسيد ليمتد؟
بيتك كبير . فيه كام أوضه ؟	منزلك كبير . كم عدد الغرف ؟	بيتك كبير. فيه كام أوضة؟
ده الدوا اللي دكتور العيلة اداهوني .	هل هذا هو الدواء الذي وصفه لي طبيب أسرتي ؟	ده الدوا اللي كتبه لي دكتور العيلة؟
هو إنت هتشرح إزاي تعمل ده؟	هل يمكنك توضيح كيفية عمل ذلك ؟	ممكن توضح إزاي ده بيشتغل؟
أنا بتعلم محادثة بالإنجليزي مرة واحدة في الأسبوع.	أتعلم المحادثة الإنجليزية مرة بالأسبوع .	بتعلم محادثة إنجليزي مرة في الأسبوع.
الجدول ده بيظهر الفروق الرئيسية بين نوعين العقود دول .	يوضح الرسم التوضيحي الفروق الرئيسية بين نوعي العقود .	الرسم التوضيحي بيوضح الفروق الأساسية بين نوعين العقود.
خليني أشوف وزنه اد ايه . كده حيبقى خمسه و تسعين سنت .	دعني أرى كم يزن . الحساب خمسة وتسعون سنتا .	خليني أشوف وزنه قد إيه. الحساب 95 سنت.
إيه الإسم التاني في إسمك؟	ما اسم الأب ؟	اسم الأب إيه؟
هاخد المنيو الثابتة دي.	سأتناول هذه الوجبة .	هاكل الوجبة دي.
الكرسى مشغول.	هذا المقعد مشغول .	الكرسي ده مشغول.
طيب. خليني أشوف. عايز واحد كاجوال ولا حاجة شيك؟	حسنا . لحظة واحدة . أتريدها عادية أم غريبة ؟	تمام. لحظة واحدة. عايزها عادية ولا غريبة؟
حطيت ستيكر "محجوز" على تذكرتك .	أنا وضعت لاصقا محجوزا على تذكرتك .	حطيت علامة محجوزة على تذكرتك.
من فضلك. أنا اشتريت الجاكيت ده امبارح، بس لقيت فيه عيب كبير هنا.	عفواً . لقد اشتريت هذا الجاكيت بالأمس ، لكن وجدت بقعة كبيرة هنا .	معلش. اشتريت الجاكيت ده امبارح، بس لقيت بقعة كبيرة هنا.
الزخرفة كويسة بالنسبة لى.	سطح السفينة يروق لي .	سطح السفينة عاجبني.
عندك منه أخضر أغمق؟	هل لديك هذا باللون الأخضر الداكن ؟	عندك ده باللون الأخضر الغامق؟
شاور لتاكسي يقف، ممكن؟	لوح إلى تاكسي كي يقف ، هلا فعلت ذلك ؟	لوّح لتاكسي يوقف، ممكن؟
حتقولي على مكان عشان آكل بتوفير؟	هل أخبرتني عن مكان أتناول فيه الطعام بتكلفة اقتصادية ؟	ممكن تقولي مكان آكل فيه بأقل تكلفة؟
لو سمحت جز على اسنانك اللي تحت بشويش .	عُضّ على أسنانك برفق ، من فضلك .	عض على أسنانك براحة، من فضلك.
بالمناسبة، مطار كانساي الدولي برضه خلص البنا بتاعه في الف تسعميه اربعة و تسعين .	بالمناسبة . لقد اكتمل مطار كانساي الدولي الجديد أيضاً في عام ألف وتسعمائة وأربعة وتسعينات .	على فكرة. مطار كانساي الدولي الجديد اتبنى في 1994 برضه.
عدى وقت طويل قوي من اخر مرة شفتك فيها .	لقد مر وقت طويل منذ أن رأيتك .	عدّى وقت طويل من آخر مرة شفتك.
تكلفة مكالمة خارجية لطوكيو كام؟	كم تتقاضى نظير مكالمة لمسافة بعيدة لطوكيو ؟	بتاخد كام على مكالمة دولية لطوكيو؟
هو فيه إسطبل قريب من هنا؟	هل هناك إسطبل بالقرب من هنا ؟	في إسطبل قريب من هنا؟
فيه اكسبريس؟	هل هناك قطار سريع ؟	في قطار سريع؟
انا من يوكوهاما، اليابان.	أنا من يوكوهاما ، اليابان .	أنا من يوكوهاما، اليابان.
حاخد سكوتش-اون-ذا-روكس.	سآخذ ويسكي به مكعبات ثلجية .	هاخد ويسكي مع مكعبات تلج.
عايز اقدم طلب للفطار .	أريد طلب الإفطار .	عايز أطلب فطار.
اديني لفه من شريط فيلم ستاشر ميللي فيه امكانية وجود الصوت .	أعطيني فيلماً سينمائياً ستة عشر ملي مع إمكانيات صوتية .	اديني فيلم 16 ملي مع إمكانيات صوتية.
علبة لميلر.	علبة واحدة ميلر .	علبة واحدة ميلر.
أنا مش لاقي المرشد السياحي اللي المفروض يجيلنا الساعة عشرة ونص الصبح.	لا أستطع العثور مرشد الجولة الذي من المفترض أن يأتي إلينا في العاشرة و النصف صباحا .	مش لاقي مرشد الجولة اللي كان المفروض ييجي الساعة عشرة ونص الصبح.
اللون تمام . بس المشكلة في المقاس . نقدر نغير ده في ساعة؟	اللون مقبول ، لكن المقاس غير صحيح . هل من الممكن أن تقوم بتغيرها في خلال ساعة ؟	اللون مناسب، بس المقاس غلط. ممكن تغيرها في ساعة؟
اعذرني، بس انا تهت . ممكن تساعدني؟	عذرا ، ولكني ضللك طريقي . هل لك أن تساعدني ؟	آسف، بس ضللت طريقي. ممكن تساعدني؟
لأ . ، احسنلنا فواتيرنا تكون منفصلة، من فضلك . خلينا نروح بالخطوط الجوية الهولندية .	لا ، نريد كل فاتورة على حدة من فضلك . ليدفع كل عن نفسه .	لأ، عايزين كل فاتورة لوحدها من فضلك. كل واحد يدفع عن نفسه.
عاوز أوصل حوالي من الضهر للساعة اتنين للوس انجلوس.	أريد الوصول إلى لوس أنجلوس ما بين الظهيرة حتى الساعة الثانية .	عايز أوصل لوس أنجلوس بين الظهر والساعة اتنين.
احنا في موسوم المحار، علشان كده حيكون طعمة كويس .	الآن موسم جمع المحار ، لذلك سيكونون في حالة جيدة .	دلوقتي موسم جمع المحار، علشان كده هيكونوا في حالة كويسة.
عندي شوية غسيل. حيكون جاهزعلى بكرة الصبح؟	لدى بعض الملابس للغسيل . هل ستكون جاهزة صباح الغد ؟	عندي شوية هدوم للغسيل. هتكون جاهزة الصبح؟
حنوصل امتى لنيويورك؟	متى نصل إلى نيويورك ؟	هنوصلك نيويورك إمتى؟
تقريبا حوالي كام تكلفني رسوم الخدمة؟	ما هي تكلفة الخدمة تقريبا ؟	تكلفة الخدمة تقريباً كام؟
القطر ده بيروح فين؟	أين سيتجه هذا القطار ؟	القطر ده رايح فين؟
دول جعانين .	انهم جوعي .	هما جعانين.
حناخد تلات كراسي في النص في الصف ده .	سنأخذ المقاعد الثلاثة الوسطى في هذا الصف .	هناخد التلات كراسي اللي في النص في الصف ده.
مكن أطلع الطيارة بده؟	هل يمكنني أن أحضر هذا على متن الطائرة ؟	ممكن أجيب ده معايا على الطيارة؟
انت ماجبتش السلطة اللي طلبتها، للأسف.	أنت لم تحضري لي سلطتي ، معذرة .	انتي ما جبتيش السلطة بتاعتي، معلش.
ايه ده الملفوف في ورقة بيضا؟	ما هذا الملفوف في ورق أبيض ؟	إيه اللي ملفوف في الورق الأبيض ده؟
وقت المغادرة لو سمحت.	تاريخ الرحيل من فضلك .	تاريخ الرحيل، لو سمحت.
تقدر تشوف المبنى الابيض؟ ده قدام المبنى .	هل ترى مبنىً أبيض ؟ إنه أمام المبنى .	شايف المبنى الأبيض؟ هو قدام المبنى.
من امتى انت بتبدأ تاخد الغسيل بكرة الصبح؟	من أيّ وقت تقبلون الغسيل صباح الغد ؟	من إمتى بتستقبلوا الغسيل الصبح؟
امضتك . من فضلك .	التوقيع ، من فضلك .	التوقيع، من فضلك.
التلج مخللي الطريق مزحلق .	الثلج يجعل الطريق زلق .	التلج بيخلي الطريق زلق.
حداشر يناير الصبح، الحادثة حصلت .	في صباح الحادي عشر من يناير وقعت الحادثة .	في صباح يوم 11 يناير حصلت الحادثة.
هاكلمك أول ماوصل هناك.	سأخبرك بمجرد وصولي إلى هناك .	هقولك أول ما أوصل هناك.
تكلفة الشخص كام؟	كم تتقاضى للفرد ؟	بتاخد كام للفرد؟
ممكن تبدلهالي بمقاس أكبر؟	هل لك أن تغير لي هذا بواحدة ذات مقاس أكبر ؟	ممكن تغير لي ده لمقاس أكبر؟
انا مهتم بالعفش.	نحن مهتمون بالأثاث .	احنا مهتمين بالأثاث.
ممكن تخليه بتلاتين جنيه؟	هل تستطيع أن تجعلها بثلاثين جنيها ؟	ممكن تخليها بـ30 جنيه؟
ده حلو قوي .	هذا لطيف جداً .	ده لطيف جداً.
أهلا. بيير وان فيش أند جريل. أي خدمة.	مرحباً . بيير وان فيش آند جريل . هل لي أن أساعدك ؟	أهلاً. بيير وان فيش آند جريل. ممكن أساعدك؟
الكاوتش مخروم .	لدي نوع مستوي .	عندي نوع مستوي.
مين فين أقدر اشتري تذكرة التزحلق عالجليد؟	من أين يمكنني شراء تذكرة لنقلى إلى المكان الذي أريده ؟	أقدر أشتري تذكرة عشان أروح المكان اللي عايزه منين؟
جيبي أتنشل. كان معايا حوالي ميتين دولار في محفظتي.	لقد نشلت . كان معي حوالي مائتا دولار في المحفظة .	اتنشلت. كان معايا حوالي 200 دولار في المحفظة.
إيه الحاجة اللي بتميز البلد دي؟	ما هو تخصص هذا البلد ؟	إيه تخصص البلد دي؟
أوكي. وتحب نوع إيه من الفاكهة؟ عندنا برتقان، وفراولة وعنب.	حسناً . ما نوع الفاكهة التي تريدها ؟ عندنا برتقال وفراولة وعنب .	تمام. عايز أي نوع فاكهة؟ عندنا برتقال وفراولة وعنب.
عايز اسيب شنطي.	أود أن أترك حقائبي .	عايز أسيب شنطي.
أنا كنت حاجز دوبل.	لقد حجزت مزدوجاً .	حجزت مزدوج.
ممكن تلفهم مع بعض؟	هل يمكنك تغليفهم مع بعضهم البعض ؟	ممكن تغلفهم مع بعض؟
ينفع نسيب حاجتنا في الاتوبيس، ماعدا الحاجات المهمه؟	هل يمكننا ترك أشياءنا ما عدا الأشياء القيمة في الحافلة ؟	ممكن نسيب حاجتنا ما عدا الحاجات القيمة في الأتوبيس؟
تاني واحد عاليمين .	إنها التالية من على اليمن .	هي اللي جاية على اليمين.
فين مكتب المفقودات؟	أين مكتب المفقودات ؟	فين مكتب المفقودات؟
مدخنين، لو سمحت. وكرسي جمب الشباك، لو سمحت.	ركن المدخنين ، من فضلك . وشباك بجوار النافذة ، من فضلك .	ركن المدخنين، من فضلك. وكرسي جنب الشباك، من فضلك.
تحب تسيب رسالة؟	هل تود أن تترك رسالة ؟	عايز تسيب رسالة؟
المصنع ده مساحته قد إيه، بالمقاسات المترية؟	كم مساحة موقع المصنع ، بقياسات مترية ؟	مساحة موقع المصنع قد إيه بالمتر؟
التمرين الكتير يخليك ممتاز .	الممارسة تؤدي إلى الإتقان .	التدريب بيجيب الإتقان.
فيه سناك بار هنا؟	هل يوجد مطعم للوجبات الخفيفة هنا ؟	في مطعم وجبات خفيفة هنا؟
بتشتكي من ايه؟	ما هي شكواك ؟	إيه مشكلتك؟
أنا شايف إنك مش فاهم اللي كنت بحاول أشرحه.	أعتقد أنك أسأت فهم ما كنت أحاول شرحه .	أعتقد إنك فهمت غلط اللي كنت بحاول أشرحه.
ايوه . خليني أحط الصندوق الكبير ده؟ انت رايح فين؟	بالتأكيد . دعني أضع صندوق الأمتعة هذا ؟ إلى أين أنت ذاهب ؟	أكيد. خليني أحط صندوق الأمتعة ده؟ رايح فين؟
احنا فاتحين من عشرة لسبعة و نص .	نفتح من العاشرة حتى السابعة والنصف .	بنفتح من الساعة عشرة لحد سبعة ونص.
أنا مش قادر أجيب الرقم ده.	لا أستطيع أن أصل إلى هذا الرقم .	مش قادر أوصل للرقم ده.
أنا اتشكيت من شوك القنفد.	لقد أصبت بوخزه من الشوك الذي يغطي ظهر قنفذ البحر .	اتشكت من شوك اللي على ضهر قنفذ البحر.
العقد ده حيتجدد سنوي .	سوف يتم تجديد العقد سنوياً .	العقد هيتجدد سنوياً.
ناوي تعمل ايه بعد ما تخلص المدرسة؟	ماذا تنوي أن تفعل عقب الانتهاء من المدرسة . ؟	ناوي تعمل إيه بعد ما تخلص المدرسة؟
لف كل واحده لوحدها، و ماتنساش الشريط على كل واحده، من فضلك .	غلف هؤلاء كلا على انفراد وضع شريط على كل واحدة , من فضلك .	غلف دول كل واحد لوحده وحط شريط على كل واحد، من فضلك.
هو انا محتاج اى معاملة خاصة؟	هل أحتاج لعلاج خاص ؟	محتاج علاج خاص؟
شيكاتي السياحية بالدولار الامريكي.	شيكاتي السياحية بالدولار الأمريكي .	شيكاتي السياحية بالدولار الأمريكي.
خليك بعيد عن الشغل لحد التلات، و ماتاكلش كتير .	لا تذهب إلي العمل حتى الثلاثاء , و لا تأكل كثيرا .	ما تروحش الشغل لحد يوم التلات، وما تاكلش كتير.
مش هاينفع تعمل دايت مع نحافة جسمك دي.	لا يمكنك أبدا أن تقوم بعمل رجيم و أنت نحيف الجسم بهذه الصورة .	ما تقدرش تعمل رجيم وانت نحيف بالشكل ده.
عاوز أحجز كرسي لسياتل.	أريد حجز مقعد على رحلة إلى سياتل .	عايز أحجز مقعد على رحلة لسياتل.
البرج ارتفاعه ستمية اربعة وتلاتين قدم.	ارتفاع هذا البرج ستة مائة أربعة وثلاثون قدما .	ارتفاع البرج ده 634 قدم.
فين ممكن اخد ليموزين لفندق الهيلتون؟	من أين يمكنني ركوب السيارة الليموزين لفندق هيلتون ؟	أقدر أركب الليموزين لفندق هيلتون منين؟
طبعا، في الحالة دي، شركة الطيرات حتدي تعويض.	طبعاً ، في هذه الحال ، ستقدم شركة الطيران تعويضاً .	طبعاً، في الحالة دي، شركة الطيران هتقدم تعويض.
ياربي، انت بتسوق بسرعة أوي. ممكن تبطأ؟	ياه ، إنك تقود السيارة بسرعة كبيرة . هلا أبطأت ؟	ياه، إنت سايق بسرعة جداً. ممكن تهدي؟
لموأخذاة، هو فين أقرب صيدلية قريبة من هنا؟	معذرة . أين الصيدلية القريبة من هنا ؟	لو سمحت، فين أقرب صيدلية من هنا؟
عندك منه فضة خالص؟	هل لديك اللون الفضي الخالص من هذا ؟	عندك ده باللون الفضي الخالص؟
عايز احجز تلات تذاكر لمسرحية قطة على صفيح ساخن .	أودّ حجز ثلاثة مقاعد في مسرحية " قطة على سطح صفيح ساخن " عرض مساء الغد .	عايز أحجز تلات مقاعد لمسرحية "قطة على سطح صفيح ساخن" لعرض بكرة بالليل.
أعتقد إنك حسبت غلط.	أعتقد أنك أخطأت في الحساب .	أعتقد إنك غلطت في الحساب.
عايز آخد معاد مع أ واطسن.	أريد تحديد موعد مع السيد واطسون .	عايز أحدد ميعاد مع السيد واطسون.
ممكن توريني الخاتم التاني من الشمال؟	هل لك أن تريني الخاتم الثاني من اليسار ؟	ممكن توريني الخاتم التاني من الشمال؟
ممكن تبيعه أرخص علشان هناك شويه بقع؟	هل تستطيع أن تخفض سعرها لوجود بعض البقع بها ؟	ممكن تنزل السعر علشان فيها شوية بقع؟
من فضلك خد راحتك انك تكلمنا اى وقت .	من فضلكم , نكون سعداء لو اتصلتم بنا في أي وقت .	من فضلكم، هنبقى مبسوطين لو اتصلتوا بينا في أي وقت.
ممكن تفك ده لدولارات وحايد؟	هل لك أن تفك هذه إلى عملات ورقية فئة دولار واحد ؟	ممكن تفك دول لفئات دولار واحد؟
أنا آسف، ساعتي مش شغالة مظبوط. بس أنا متأكد إنها عدت اتنين، كدة كدة.	معذرة . ساعاتي لا تعمل بشكل جيد . ولكني متأكد أن الوقت الآن بعد الثانية ، على أية حال .	معلش. ساعتي مش شغالة كويس، بس متأكد إن الوقت دلوقتي بعد الساعة اتنين.
ياه، أنا سمعت الإسم. ده مشهور، مدينة قديمة، مش كده؟	أوه ، لقد سمعت الاسم . إنها مدينة قديمة مشهورة ، أليس كذلك ؟	آه، سمعت الاسم ده. دي مدينة قديمة ومشهورة، مش كده؟
ياخد كم يوم علشان يوصل بالبريد الجوي ؟	كم يوماً يستغرق البريد الجوي في الوصول ؟	البريد الجوي بياخد كام يوم علشان يوصل؟
اى طريق هو الشمال؟	أي طريق يتجه إلى الشمال ؟	أي طريق رايح للشمال؟
أنا سوجيتا أوضة تلاتاشر عشرين. انا لسه عامل تشك إن، بس الأوضة دي أصغر من ما توقعت. ممكن أغير الأوض؟	أنا سوجيتا في غرفة رقم ثلاثة عشر عشرين . أنا دخلت الفندق للتو ولكن هذه الغرفة أصغر مما توقعت . هل من الممكن تغيير الغرف ؟	أنا سوجيتا في أوضة رقم 1320. لسه داخل الفندق والأوضة دي أصغر مما كنت متوقع. ممكن أغير الأوضة؟
محتاجين وقت كمان علشان نراجع العقد .	نحتاج إلى المزيد من الوقت لكي نفحص العقد .	محتاجين وقت زيادة علشان نفحص العقد.
هو بيتعلمو برغبه شديدة احدث الازياء من التليفزيون و المجلات .	يطلعون بشغف على أحدث الأزياء في التلفاز والمجلات .	بيتابعوا بشغف أحدث الأزياء في التلفزيون والمجلات.
اظن ان عربيتي تساوي حوالي خمستلاف دولار .	أعتقد أن سيارتي تستحق حوالي خمسة آلاف دولارا .	أعتقد إن عربيتي تسوى حوالي خمسة آلاف دولار.
أهلا . معاك عامل المكالمات الدولية . عايز نطلب أى رقم؟	ألو ، هنا موظف الاتصال الخارجي . بأي رقم تريد الاتصال ؟	ألو، هنا موظف الاتصال الخارجي. عايز تتصل بأي رقم؟
معاك انسة مايزاكي في أوضة تلاته وعشرين خمستاشر . طالبة تليفون يصحيني بكرة الصبح .	أنا السيدة مايزاكي في غرفة رقم ثلاثة وعشرون خمسة عشر . أريد الاتصال لإيقاظي غداً صباحاً .	أنا السيدة مايزاكي في أوضة رقم 2315. عايزة اتصال يوقظني بكرة الصبح.
فيه أي حاجة قيمة أو ممكن تتكسر في شنطتك؟	هل يوجد أي شئ قيم أو قابل للكسر في حقيبتك ؟	في أي حاجة قيمة أو قابلة للكسر في شنطتك؟
أنهو ممر؟	أيّ ممر ؟	أي ممر؟
إنت عايز أنهي واحد، اللي بخمسة جنيه ولا اللي بعشرة؟	أي منها تريد , فئة الخمسة جنيهات أم العشرة ؟	عايز أنهي منهم، فئة الخمسة جنيه ولا العشرة؟
من فضلك جرب تاني بعدين .	من فضلك حاول مرة أخرى فيما بعد .	من فضلك حاول تاني بعدين.
انبسطت بالكلام معاك .	إنه لمن دواعي السرور أن أتحدث معك .	من دواعي سروري إني أتكلم معاك.
لأ، انت رايح في الاتجاة العكسي، لازم ترجع .	لا ، أنت تذهب فى الاتجاه الخاطئ . عليك أن ترجع للوراء .	لا، إنت ماشي غلط. لازم ترجع تاني.
إنت عندك ترانسيت لفترة في شيكاغو.	لديك محطة أخرى عند شيكاغو .	عندك محطة تانية في شيكاغو.
خلصت غداك؟	هل انتهيت من غدائك ؟	خلصت غداك؟
مش عارف انام كويس .	لا أستطيع أن أنام جيدا .	مش قادر أنام كويس.
هي قهوة هارد روك بعيدة عن هنا؟	هل مقهى هارد روك بعيداً عن هنا ؟	كافيه هارد روك بعيد من هنا؟
ممكن أقعد جنبك؟	هل يمكن أن أجلس بجانبك ؟	ممكن أقعد جنبك؟
كم سعر الصرف دلوقتي في السوق؟	ما هو سعر صرف المارك ؟	سعر صرف المارك كام؟
عندك فيلم كاميرا لصور ملونه؟	هل لديكم فيلم شفاف ملون ؟	عندكم فيلم شفاف ملون؟
هاخد التي شيرت ده. بكام؟	سآخذ هذا القميص . كم ثمنه ؟	هاخد القميص ده. بكام؟
ميزه صالة العرض ديه اننا نقدر نشوف خشبة المسرح كلها .	ميزة هذا الرواق أننا نستطيع منه مشاهدة المسرح كله .	ميزة الرواق ده إننا نقدر نشوف منه المسرح كله.
ممكن ناخد ترابيزه في التراس؟	هل يمكننا الجلوس على مائدة في الشرفة ؟	ممكن نقعد على ترابيزة في الشرفة؟
حأنزل الفندق حوالي تسعة بليل .	سأقوم بتسجيل الدخول في تمام الساعة الثامنة مساءاً تقريباً .	هعمل تسجيل دخول حوالي الساعة تمانية بالليل.
من فضلك أبعت العربيه دي عالفندق تمانية الصبح بكرة .	من فضلك أرسل هذه السيارة إلى الفندق غدا في الثامنة صباحا .	من فضلك بعت العربية دي للفندق بكرة الساعة تمانية الصبح.
المدينة العاصمة هي طوكيو.	العاصمة هي طوكيو .	العاصمة طوكيو.
البحر متشاف صغير بعيد.	كان البحر إلى الأسفل من بعيد .	البحر كان لتحت من بعيد.
عندنا خمستاشر اجازة وطنيه .	لدينا خمس عشرة عطلة وطنية .	عندنا 15 عطلة وطنية.
عايز أشتري حاجات. فين منطقة الشوبنج القريبة من هنا؟	أريد التسوق . أين منطقة التسوق القريبة من هنا ؟	عايز أشتري حاجات. فين منطقة التسوق القريبة من هنا؟
طوكيو مركز الموضة .	طوكيو هي مركز الموضة .	طوكيو مركز الموضة.
حأدفع خمسين دولار .	أنا سوف أدفع خمسون دولاراً .	هدفع 50 دولار.
أكيد. تحب تلعب جولف امتى؟	بالتأكيد . متى تود أن تلعب جولف ؟	أكيد. إمتى عايز تلعب جولف؟
هاي إنت. الإيصال في الشنطة.	تفضل . الإيصال داخل الحقيبة .	تفضل. الإيصال جوه الشنطة.
من فضلك خدني لسوق الخضار و الاكل اللي بيكون فاتح الصبح .	من فضلك خذني إلى السوق الصباحية .	من فضلك خدني للسوق الصبح.
مج قهوه كبير، إذا سمحت .	إبريق من القهوة ، لطفاً .	إبريق قهوة، لو سمحت.
ممكن آخد أي كرسيين متاحين لليلة دي؟	هل يمكنني حجز أي مقعدين لهذه الليلة ؟	ممكن أحجز مقعدين لليلية؟
أنا بدرت معاد التحرك.	قمت بتقديم وقت المغادرة .	قدمت وقت المغادرة.
ده بيشمل مصاريف الخدمة؟	هل هذا يشمل رسوم الخدمات ؟	ده شامل رسوم الخدمات؟
عربيتي خلصت بنزين.	نفد الوقود من سيارتي .	البنزين خلص من عربيتي.
هاخد سبرايت كبير.	سوف أتناول زجاجة سبرايت كبيرة .	هاخد زجاجة سبرايت كبيرة.
ممكن تكلم شركة التأمين؟	أيمكنك الاتصال بشركة تأمين ؟	ممكن تتصل بشركة التأمين؟
محاولة كويسة، بس انت عمرك ما حتعرف من غير ما تحاول .	محاولة رائعة , ولكنك لن تعرف بطريقة مؤكدة بدون المحاولة .	محاولة رائعة، بس مش هتعرف بشكل مؤكد من غير ما تجرب.
واسع قوي.	إنها فضفاضة للغاية .	دي واسعة جداً.
بكام المشروم الطازه؟	كم يكلف عش الغراب الطازج ؟	بكام المشروم الطازة؟
لو اديتني خصم . انا حأشتري ده، كمان .	إذا منحتني خصماً ، سأشتري هذه ، أيضاً .	لو عملت لي خصم، هشتري دي كمان.
عايز ميعاد علشان اعمل شعري كيرلي .	أريد أن أحجز ميعادا لتمويج الشعر .	عايز أحجز ميعاد لتمويج الشعر.
عايز أحجز ترابيزه لأتنين .	أريد أن حجز منضدة لفردين .	عايز أحجز ترابيزة لفردين.
سيداتي سادتي، في رحلتنا النهاردة، معانا مضيفات بيتكلمو ياباني تقدرو تعرفوهم بشارات الاعلام الصغيرة اللي على لبسهم، لو عارفين حد محتاج مساعدة لغوية، من فضلكم خلونا نعرف .	سيداتي سادتي ، لدينا على متن رحلتنا اليوم مضيفين يتحدثون اليابانية يمكن التعرف عليهم من خلال الشارة التي يلبسونه . إذا كنت تعرف أي شخص يريد مساعدة في الترجمة ، من فضلك دعنا نعرف .	سيداتي سادتي، معانا النهارده على الرحلة مضيفين بيتكلموا ياباني، تقدروا تعرفوهم من الشارة اللي لابسينها. لو حد محتاج مساعدة في الترجمة، من فضلكم قولوا لنا.
ممكن اجربه؟	هل يمكنني أن أجرّب ذلك ؟	ممكن أجرب ده؟
عندي مشكلة . لما كنت ماشي في الشارع، محفظتي انسرقت . فين قسم البوليس؟	لدي مشكلة ، حينما كنت أسير في الشارع ، سرقت حافظة نقودي . أين يوجد قسم الشرطة ؟	عندي مشكلة، وأنا ماشي في الشارع اتسرقت المحفظة بتاعتي. فين قسم الشرطة؟
عايز كريم للبشرة الدهنية .	أريد كريم للبشرة الدهنية .	عايز كريم للبشرة الدهنية.
ممكن صورة من محضر البوليس، من فضلك؟	هل لي أن أحصل على نسخة من تقرير الشرطة ، من فضلك ؟	ممكن آخد نسخة من تقرير الشرطة، لو سمحت؟
انا مش باكل ديه .	لم آكل هذا .	ما كلتش ده.
ايه اخر حاجه بتقلعها، قبل ما تدخل تنام؟	ما هو أخر شئ خلعته من ملابسك , قبل أن تذهب للنوم ؟	آخر حاجة قلعتها قبل ما تنام كانت إيه؟
لأ، متعملش كده من فضلك. ده لاستخدامي الشخصي.	لا ، من فضلك لا تفعل . هذا لاستخدامي الخاص .	لأ، من فضلك ما تعملش كده. ده للاستعمال الشخصي.
لم تنزل بالسلم تحت، هتلاقي المكتب على طول.	استقل المسعد هابطا ، وستجد المكتب هناك مباشرة .	خد الأسانسير وانزل، هتلاقي المكتب هناك على طول.
أنا بافضل النظام الغربي في الأكل.	أفضل تناول الطعام الغربي .	بأفضل الأكل الغربي.
في أكياس الورق البني دي.	في هذه الحقائب الورقية البنية .	في الشنط الورق البنية دي.
العفو. هو لطيف.	على الرحب و السعة . إنها جميلة .	على الرحب والسعة. دي جميلة.
بالاسعار ديه، متهيألي حأشوف محلات تانيه .	بهذا السعر , اعتقد إنني سوف ابحث عن محلات أخري .	بالسعر ده، أعتقد إني هبص في محلات تانية.
نضف البلورة دي من فضلك.	من فضلك , قم بتنظيف هذه البلوزة .	من فضلك، نظف البلوزة دي.
سيب شنطي، من فضلك .	احتفظ بأمتعتي , من فضلك .	خلي الشنط بتاعتي معاك، لو سمحت.
ممكن ورق حمام؟	هل لى بفوطة حمام ؟	ممكن فوطة حمام؟
والدك كان شخص رائع، حنشتاقله.	لقد كان والدك شخص رائع , وسوف نفتقده .	والدك كان شخص رائع، وهنفتقده.
اديني ورق مناديل .	أعطني بعض المناديل الورقية .	اديني شوية مناديل ورق.
بلليل بعد بكره .	مساء بعد غد .	بعد بكرة بالليل.
ممكن تلاقيلى مربية؟	هل لك أن تجد لي جليسة أطفال ؟	ممكن تلاقي لي حد يقعد مع الأطفال؟
ممكن تغير معادي؟	هل يمكنك تغيير منضدتي ؟	ممكن تغير الترابيزة بتاعتي؟
من فضلك املى استمارة الحاجات الضايعة .	من فضلك أكمل البيانات الناقصة في التقرير .	من فضلك كمل البيانات الناقصة في التقرير.
يهمك التحلية؟	هل تريد بالحلويات ؟	عايز حلويات؟
اد ايه الفايدة؟	كم السعر ؟	بكام؟
التاني تحت.	أنه التالي على الطريق .	ده اللي جاي على الطريق.
فين مدخل المترو؟	أين المدخل إلى المترو ؟	فين مدخل المترو؟
كويس، أنا حاسس إني حيكون معايا حاجة مختلفة.	حسنا , أظن أنني سأحصل على شيء مختلف .	تمام، أعتقد إني هاخد حاجة مختلفة.
ممكن ناخد ترابيزة برة؟	هل يمكن أن نحصل على منضدة بالخارج ؟	ممكن نقعد على ترابيزة بره؟
اليومين دول فيه نزلات برد كتير.	كثير من حالات الإصابة بالبرد منتشرة هذه الأيام .	حالات البرد كتيرة الأيام دي.
بتقول عليه ايه بالانجليزى؟	ماذا تسمون هذا بالإنجليزية ؟	إيه اسم ده بالإنجليزي؟
لازم اكون في المطار عالساعة تمانية الصبح .	علي أن أصل إلى المطار قبل الساعة الثامنة صباحاً .	لازم أوصل المطار قبل الساعة 8 الصبح.
ممكن تقولي أملا النموذج ده إزاي؟	هل يسعك أن تخبرني كيفية استيفاء هذه الاستمارة ؟	ممكن تقولي إزاي أملأ الاستمارة دي؟
مظبوط هى هناك .	إنها على اليمين هناك .	هي على اليمين هناك.
ده مقطوع . من فضلك قلل سعرة اكتر شويه.	إنه ممزّق . من فضلك اخصم منه أكثر .	ده مقطوع. من فضلك اعمل خصم أكبر.
لو تكرمت أحجز ترابيزة لخمس تنفار .	أرجو حجز مائدة لخمسة أفراد .	عايز أحجز ترابيزة لخمس أفراد.
باقترح عقد .	أنا أوصي بقلادة .	بأوصي بعقد.
استاذ تسنونيو سوزوكي؟ ممكن من فضلك تملا بطاقة الحجز ديه؟ تحب أوضه نوعها ايه؟	السيد تسونيو سوزوكي ؟ هل تسمح من فضلك أن تملأ بطاقة التسجيل هذه ؟ أي نوع من الغرف تحب ؟	السيد تسونيو سوزوكي؟ ممكن تملأ بطاقة التسجيل دي؟ عايز أوضة نوعها إيه؟
الساعة تكلفني كام؟	كم تتكلف لساعة واحدة ؟	تكلفة الساعة كام؟
لأ، ماعنديش وقت كتير . مجرد الاعداد .	كلا ، ليس لدي متسع من الوقت . فقط توضيب .	لا، ما عنديش وقت. بس توضيب.
ممكن من فضلك تطلعلي جواز سفر مؤقت؟	هل يمكن أن تصدر لي جواز سفر مؤقت من فضلك ؟	ممكن تصدر لي جواز سفر مؤقت، لو سمحت؟
هو ده دهب؟	أهذا ذهب ؟	ده دهب؟
أيوة، تحب تغير إيه؟	أجل ، ماذا تريد أن تغير ؟	آه، عايز تغير إيه؟
ديه حاجه تبسطني . انا بأخطط اعمل جولة اشوف معالم البلد و اشوف اصحاب من زمان ليا .	متعة . أخطط أن أقوم برؤية المعالم وزيارة بعض الأصدقاء القدامى .	متعة. مخطط أشوف المعالم وأزور شوية أصحاب قدام.
ادي خمسين دولار في حالة وقعت في مشكلة .	هاك خمسون دولارا لو وقعت في ضائقة .	خد خمسين دولار لو اتزنقت.
هم المبتئين مش كويسين؟	هل المبتدئين ليسوا جيدين ؟	المبتدئين مش كويسين؟
درجة تانية ذهاب فقط، إذا سمحت .	درجة ثانية ذهاب فقط من فضلك .	تذكرة درجة تانية رايح بس، من فضلك.
اهاه، ياللا . دولارين بس .	أهه ، هيا . دولارين فقط .	أهه، يلا. دولارين بس.
كان ممتع قوي اني اتكلم معاك .	استمتعت بالتحدث إليك .	استمتعت بالكلام معاك.
اتنين ستة تسعة واحد صفر خمسة واحد، كود المنطقة زيرو تلاتة.	اثنان ، ستة ، تسعة ، واحد ، صفر ، خمسة ، واحد . الرقم الكودي للمنطقة هو صفر ، ثلاثة .	اتنين، ستة، تسعة، واحد، صفر، خمسة، واحد. كود المنطقة صفر، تلاتة.
شكرا، عموما.	شكراً على أي حال .	شكراً على أي حال.
أنا باجمرك دي.	أنني أعلن هذا البند .	أنا بعلن عن البند ده.
كل المسافرين يفضلوا قاعدين.	كل الركاب يظلوا في مقاعدهم .	كل الركاب يفضلوا في مقاعدهم.
هو لازم آجي المستشفى كل يوم؟	هل يجب أن آتي إلى المستشفى كل يوم ؟	لازم أجي المستشفى كل يوم؟
اديني امضتك هنا، من فضلك .	أعطني توقيعك هنا ، من فضلك ؟	اديني توقيعك هنا، لو سمحت؟
عايز أروح سان جييجو.	أريد الذهاب إلى سان دييجو .	عايز أروح سان دييجو.
العروسة دي للبيع؟	هل هذه الدمية للبيع ؟	اللعبة دي للبيع؟
انا بره اوضتي بدون مفتاح . ممكن استلف مقتاح تاني، من فضلك ؟	لقد أغلقت الغرفة وأنا خارجها . هل تسمح لي باستعارة نسخة أخرى من المفتاح ، لطفاً ؟	قفلت الأوضة وأنا برا. ممكن أستعير نسخة تانية من المفتاح، لو سمحت؟
أنا حطيت ورق استلام الشنط بتاعك على الكافر بتاع تذكرتك.	قمت بلصق بطاقة المطالبة بالأمتعة على غلاف التذكرة .	لصقت بطاقة المطالبة بالأمتعة على غلاف التذكرة.
ازيك . معاك ياماشيتا بيكلمك. عايز اكلم مستر سميث .	ألو . أنا ياما شيتا الذي أتحدث . أود التحدث إلى السيد سميث .	ألو. أنا ياما شيتا. عايز أتكلم مع السيد سميث.
اكيد. تحب تلعب امتى؟	بالتأكيد . متى تريد اللعب ؟	أكيد. إمتى عايز تلعب؟
قوله يتكلم قبل عشرة، بتوقيت اليابان.	اطلب منه أن يتصل قبل العاشرة بتوقيت اليابان .	قوله يتصل قبل الساعة 10 بتوقيت اليابان.
أنا سبت الكاميرا بتاعتي في التاكسي.	نست آلة التصوير الخاصة بي في سيارة الأجرة .	نسيت الكاميرا بتاعتي في التاكسي.
اى نوع من الاكل يمشي معاه؟	أيّ نوع من الغذاء يتماشى معه ؟	أي نوع أكل ينفع معاه؟
حاجة وحشة أوي إننا لازم نلغي، بس مافيش حاجة نقدر نعملها ف الموضوع ده.	يسوءني أن أضطر للإلغاء ، ولكن الأمر ليس بأيدنا .	آسف لازم ألغي، بس مش بإيدينا.
في البداية انا لازم أشكرك جدا للبرنامج الرائع اللي إنت حضرتهولي.	في البداية ينبغي علي أن أشكرك كثيرا على البرنامج المثالي الذي أعددته لي .	الأول عايز أشكرك جداً على البرنامج الرائع اللي حضرته لي.
ايه اسم النبات ده؟	ما اسم هذا النبات ؟	إيه اسم النبات ده؟
ايه؟ مفروض تدفع ضريبة لو معاك اكتر من تلات قزايز خمرة؟	ماذا ؟ هل عليك دفع ضرائب عندما يكون لديك أكثر من ثلاثة زجاجات كحول ؟	إيه؟ لازم تدفع ضرايب لو معاك أكتر من تلات زجاجات كحول؟
ممكن أفضل في الطيارة وقت ماحنا مستنيين؟	هل يمكنني البقاء في الطائرة خلال فترة الانتظار ؟	ممكن أقعد في الطيارة أثناء فترة الانتظار؟
اوه، لأ . انا عارف ديه كانت غلطة .	أوو ، لا . أعلم أنها كانت خطأ . سأعود إلى اليابان كرجل فقير .	أوه، لأ. عارف إنها كانت غلطة. هرجع اليابان فقير.
مساء الخير، مدام كينت . بقالي مده كبيرة ما شفتكيش .	مساء الخير ، السيدة كنت . لم نلتقي منذ زمن بعيد .	مساء الخير، مدام كنت. ما اتقابلناش بقالنا كتير.
أنا سيبت شنطة ايدى ف حتة.	لقد تركت حقيبة اليد الخاصة بي في مكان ما .	نسيت شنطة اليد بتاعتي في حتة ما.
دلوقتي، مكالمتك اشتغلت . اتفضل لو سمحت .	الآن ، مكالمتك ردت . تفضل من فضلك .	دلوقتي المكالمة وصلت. اتفضل.
هتوريني قايمة بأنواع العربيات والتكلفة؟	هل لك أن تريني قائمة بأنواع السيارات وأسعارها ؟	ممكن توريني قائمة بأنواع العربيات وأسعارها؟
ممكن أحجز على تسعة و نص الصبح، من فضلك؟	هل يمكن أن أعمل حجزاً في التاسعة وثلاثين دقيقة صباحاً ، من فضلك ؟	ممكن أحجز الساعة تسعة ونص الصبح، من فضلك؟
الواد اللي واقف في مكتب الاستقبال مش مؤدب .	الشخص الذي في مكتب الاستقبال فظّ للغاية .	الشخص في الاستقبال كان فظ جداً.
خليني أحاول فيها، لو سمحت.	دعني أقيس هذا من فضلك .	خليني أقيس ده، من فضلك.
عالم صغير .	يا له من عالم صغير .	يا له من عالم صغير.
لسوء الحظ، هو مشغول جدا اليوم ده .	لسوء الحظ هو مشغول جداً في ذلك اليوم .	للأسف هو مشغول جداً في اليوم ده.
جيت عشان آخد عربية. رقم الحجز بتاعي أهو.	قدمت لأخذ سيارة . هذا هو رقم الحجز .	جيت آخذ عربية. ده رقم الحجز.
ايه العربون؟	كم المقدم ؟	المقدم كام؟
ربما ما يقلش عن خمسة و تلاتين دولار .	من المحتمل أن تكون خمس وثلاثين دولاراً على الأقل .	ممكن تكون على الأقل 35 دولار.
إيه هواياتك؟	ما هي هواياتك ؟	إيه هواياتك؟
لأ، من فضلك هاته في تلاتين دقيقة .	لا ، من فضلك أحضرها خلال ثلاثين دقيقة .	لأ، من فضلك جيبها خلال تلاتين دقيقة.
على الشمال ولا اليمين؟	هل هي على جهة اليمين أم اليسار ؟	على اليمين ولا الشمال؟
حبيت المكان هنا؟	هل يروقك هذا المكان ؟	المكان ده عجبك؟
اعتقد إنك قاعد ف الكرسي بتاعي.	أظنك قد جلست على مقعدي .	أعتقد إنك قعدت على كرسيي.
ده صناعته وحشة .	إنه رديء الصنع .	ده معمول بطريقة وحشة.
عايز مفكرة .	أرغب في الحصول على بعض ورق الرسائل .	عايز شوية ورق للرسائل.
انا بس معدي .	أنا أمر فقط .	أنا بعدي بس.
انت اخدت اى عصير فواكة؟	هل لديكم أي عصير فواكه ؟	عندكم أي عصير فواكه؟
ممكن تحجزلنا بكرة بليل؟	هل تقوم بالحجز لنا لمساء الغد ؟	ممكن تحجز لنا لبكرة بالليل؟
لو سمحت خد الشنط دي لمحطة الأتوبيس.	من فضلك خذ هذه الأمتعة لموقف الأتوبيس .	من فضلك خد الشنط دي لموقف الأتوبيس.
إذا سمحت قوللي أعمل مكالمة دوليه أزاي.	من فضلك أخبرني كيف يمكن أن أجري مكالمة دولية .	ممكن تقولي إزاي أعمل مكالمة دولية؟
ممكن تناولتي الملح؟	هل يمكنك إعطائي الملح ؟	ممكن تديني الملح؟
بتقول " حافظ عالحارة اللي انت ماشي فيها ".	إنها تقول " ألتزم بحارتك . "	هي بتقول "الزم حارتك".
بي إس اختصار لبوستسكريبت.	بي . إس . ترمز إلى حاشية الصفحة .	بي إس يعني حاشية الصفحة.
لا مؤاخذة، ممكن شويه ميه؟	معذرة ، هل لي ببعض الماء ؟	لو سمحت، ممكن شوية مية؟
ازاي اروح المتحف؟	كيف يمكن أن أذهب إلى المتحف ؟	إزاي أروح المتحف؟
لو سمحت إديني تذكرة.	من فضلك أعطني تذكرة .	اديني تذكرة، من فضلك.
انا جيت علشان ادرس في مدرسة لغات .	أتيت للدراسة في مدرسة للغات .	جيت أدرس في مدرسة لغات.
المقابر في اليونان أثرية.	لقد كانت المزارات في اليونان تاريخية .	المزارات في اليونان كانت تاريخية.
ديه رحلة مباشرة بدون توقف؟	هل هي رحلة مباشرة ؟	الرحلة دي مباشرة؟
ممكن أحول فلوس على حساب التوفير بتاعي؟	هل يمكنني أن أحول أموال إلى حساب المدخرات الخاص بي ؟	ممكن أحول فلوس لحساب التوفير بتاعي؟
هو القطر السريع بيقف في سان دييغو؟	هل يتوقف القطار السريع في سان ديجو ؟	القطر السريع بيقف في سان دييجو؟
فين رقم الكرسي؟	أين رقم المقعد هذا ؟	فين رقم الكرسي ده؟
فيه برضه سناك بار؟	هل ثمة أيضاً قسم للوجبات الخفيفة ؟	في قسم للوجبات الخفيفة؟
ده حقيقي ولا اصطناعي؟	هي طبيعي أم اصطناعي ؟	طبيعي ولا صناعي؟
للأسف الباقي بتاعي ناقص. ممكن تراجع تاني؟	آسف إن تغييري قليل . هل يمكنك أن تفحص ثانية ؟	آسف، فكة قليلة. ممكن تشوف تاني؟
ده في نهاية الشارع ده .	إنه في نهاية هذا الشارع .	هو في آخر الشارع ده.
عايز فلفل، من فضلك .	أبغي بعض الفلفل ، من فضلك ؟	عايز شوية فلفل، لو سمحت؟
ممكن أحط شنطي في شنطة العربية؟	أيمكنني أن أضع حقائبي في صندوق السيارة ؟	ممكن أحط شنطي في شنطة العربية؟
حتستمر اد ايه؟	ما المدة التي ستعمل هي فيها ؟	هتشتغل قد إيه؟
ممكن أروح فين عشان أشوف منظر حقيقي كويس؟	أين يمكنني الذهاب لكي أري منظراً رائعاً حقاً ؟	أروح فين عشان أشوف منظر حلو بجد؟
البنك بيفتح إمتى؟	متى يفتح المصرف ؟	البنك بيفتح إمتى؟
عاوز أتكلم معاك أكتر.	أريد أن أتحدث معك أكثر .	عايز أتكلم معاك أكتر.
ممكن تقولى الأتوبيس بيوصل شارع اتنين واربعين امتى؟	هل لك أن تخبرني عن ميعاد وصول الحافلة إلى شارع رقم اثنين وأربعون ؟	ممكن تقولي معاد وصول الأتوبيس لشارع 42؟
ماأظنش ان السكينه جيه نضيفة . ممكن تديني واحده تانيه؟	لا أعتقد أن هذه السكينة نظيفة . أيمكنك أن تُحضر لي واحدة أخرى ؟	مش باعتقد إن السكينة دي نظيفة. ممكن تجيب لي واحدة تانية؟
شايف . ده كتير، مش كده؟ حأجيبلك شنطة بواقي اكل المطعم بعد شويه .	انظر ، إنها ضخمة ، أليس كذلك ؟ سأحضر لك شنطة لحمل بقية الطعام لاحقاً .	بص، دي كبيرة، مش كده؟ هجيب لك شنطة عشان تاخد باقي الأكل بعدين.
عايزه اشتري حاجات قبل ما نمشي . ممكن تاخد بالك من شنطي شويه؟	أريد التسوق قبل أن نغادر . هل لك أن تعتني بحقيبة سفري لبرهة ؟	عايز أتسوق قبل ما نمشي. ممكن تهتم بشنطتي شوية؟
فين قسم غير المدخنين؟	أين قسم غير المدخنين ؟	فين قسم غير المدخنين؟
تحبني أبلغك؟	هل تحب أن أقول لك ؟	تحب أقولك؟
ديه أخر مره نقف فيها؟	هل هذه هي آخر محطة ؟	دي آخر محطة؟
ده قليل قوي .	إنه قليل جداُ .	قليل أوي.
من فضلك وديني هناك .	من فضلك خذنى إلى هناك .	من فضلك خدني هناك.
أنا عايز آخد معاد لسيشوار الساعة تلاتة.	أريد تحديد موعد لتجفيف شعري في الساعة الثالثة .	عايز أحجز ميعاد لتجفيف شعري الساعة 3.
الفلوس ديه علشان اقلام الجاف، ورقة بميه دولار .	هذه هي فلوس أقلام الحبر . فاتورة بمائة دولار .	دي فلوس أقلام الحبر. فاتورة بـ100 دولار.
هى هناك.	إنه هناك .	هو هناك.
هو هناك عاليمين .	إنه هناك على الجانب الأيمن .	هو هناك على اليمين.
في أوضة لتغيير الهدوم؟	هل ثمة غرفة لتغيير الملابس ؟	في أوضة لتغيير الهدوم؟
نحب كلنا نكون على نفس الترابيزة .	نود أن نكون على الطاولة نفسها .	عايزين نقعد على نفس الترابيزة.
كده تمام . دلوقتي انت حجزت .	حسنا . لقد قمنا بالحجز لك .	تمام. حجزنا لك.
معاك مرشد خبير؟	هل لديكم مرشد ذو خبرة ؟	عندكم مرشد خبرة؟
فيه اى رحلة من دول فيها مرشدين بيتكلمو ياباني؟	هل أي من الرحلات بها مرشدين يتحدثون اليابانية ؟	في رحلات فيها مرشدين بيتكلموا ياباني؟
ده ضيق جدا هنا .	انه ضيق للغاية هنا .	المكان هنا ضيق جداً.
من تلاتين ألف ين.	من ثلاثين ألف ين .	من تلاتين ألف ين.
فنسنت، هو إنت بتمنع نفسك من الدخول؟ أنا مارني.	فينسنت ، هل أغلقت الباب علي نفسك ؟ أنا مارني .	فينسنت، قفلت الباب على نفسك؟ أنا مارني.
اسمي هيساي تشيبا. أنا يابانى.	اسمي هيساي تشيبا . أنا ياباني .	اسمي هيساي تشيبا. أنا ياباني.
ايوه، حأشتري . بس هى بكام؟	نعم ، سأفعل . ولكن كم يكلف ؟	أيوة، هعمل كده. بس بكام؟
افضل فندق تكلفتة اقل لو كان في منطقة مافيهاش مشاكل .	فندق أقل غلاءً هو الأفضل إذا كان في منطقة آمنة .	فندق أرخص يكون أحسن لو في منطقة آمنة.
في رحلة سياحية؟	هل توجد جولة ؟	في جولة؟
فين هو؟	أين ؟	فين؟
الجرح عمل صديد.	لقد تقيح الجرح .	الجرح عمل صديد.
ادفع كام علشان أاجر موبايل و بيچر؟	كم سعر تأجير هاتف محمول وباجر ؟	كام تأجير موبايل وباجر؟
ده معناه ايه؟	ماذا يعنى ذلك ؟	ده معناه إيه؟
عندك دانهيل؟	هل معك دنهل ؟	معاك دنهل؟
ساعتين قبل السفر.	ساعتان قبل الرحيل .	ساعتين قبل الرحيل.
بأدور على حاجه مصنوعه في اميركا .	أنا أبحث عن شيء صنع في الولايات المتحدة الأمريكية .	بدور على حاجة مصنوعة في أمريكا.
قول تاني من فضلك بس بالراحة.	من فضلك كررها مرة أخرى ببطء أكثر .	من فضلك قولها تاني بالراحة.
وحقدر ده لو حضرتك تفضلت وعدت نظر في تجديد العقد.	سأكون ممنوناً لو أعدت النظر في تجديد العقد .	هبقى ممنون لو تعيد النظر في تجديد العقد.
كويس. انت خلصت.	حسنا . لقد انتهيت .	تمام. خلصت.
ممكن أسيب عربية المشتريات بره الطرقة؟	هل يمكن أن أترك هذه العربة خارج الردهة ؟	ممكن أسيب العربية دي برا؟
الاتوبيس اهوه هناك .	الحافلة هناك .	الأتوبيس هناك.
لازم تعمل حجز مقدم.	عليك أن تحجز مقدما .	لازم تحجز مسبقاً.
ممكن أقعد في اى مكان عاجبني؟	هل لي أن أجلس في أي مكان أريد ؟	ممكن أقعد في أي مكان؟
أنا هادفع لنفسي.	سأدفع بنفسي .	هدفع بنفسي.
امتى ميعاد الاتوبيس الجاي؟	ما هو موعد قدوم الحافلة التالية ؟	إمتى ميعاد الأتوبيس الجاي؟
ممكن اخد شوية فكة؟	هل يمكنني الحصول على بعض الفكة ؟	ممكن شوية فكة؟
ياه. مش معقول إني قابلتك هنا.	آه . كم كنت مشتاق لرؤيتك هنا .	آه. كنت مشتاق أشوفك هنا.
ده بيشمل تأمين الحوادث و المسئولية القانونية.	تشمل تأمين ضد التصادم والدين .	بيشمل تأمين ضد التصادم والدين.
ممكن أستخدم التليفون؟	هل لي أن أستخدم الهاتف ؟	ممكن أستخدم التليفون؟
لو سمحت. وريني الشنط، لو سمحت.	من فضلك . أرني حقائب , من فضلك .	من فضلك، وريني شنط.
يسعدنا نقدم ليكم المشروب اللي تختاروة، بعد الاكل . حتلاقو لسته كاملة بأنواع المشروبات اللي بنقدمها في رحلتنا موجوده في دليل المعلومات في مجلتنا.	يسعدنا أن نقدم لك الشراب الذي تريده متبوعاً بالغداء . دليل كامل بالمشروبات التي نقدمها على رحلتنا موجودة في دليل المعلومات الخاص بمجلتنا .	يسعدنا نقدم لك المشروب اللي تريده وبعده الغدا. دليل كامل بالمشروبات موجود في مجلة المعلومات.
اكتر حاجه بتوحشني العيون السخنة .	ما أفتقده أكثر من غيره هو الينابيع الحارّة .	اللي بفتقده أكتر من أي حاجة هو الينابيع الحارة.
في الحالة دي، من فضلك روح مكتب الشكاوي ومعاك ورقة الاستلام بتاعتك.	في هذه الحال عليك بالتوجه إلى مكتب المطالبات من فضلك ومعك بطاقة المطالبة .	في الحالة دي روح مكتب المطالبات مع بطاقة المطالبة.
ممكن اطلب منك تكلمني بعد شوية؟	هل لك أن تتصل بي لاحقا ؟	ممكن تتصل بيا بعدين؟
سندوتش سوسيس صغير و كاكولا كبيرة، من فضلك .	هوت دوج حجم صغير وكولا كبيرة ، من فضلك .	هوت دوج صغير وكولا كبيرة، من فضلك.
انت بتتصل من فين؟	من أين تتصل ؟	بتتصل منين؟
عايز اشتري فيلم ريفرسال كوداك ستة وتلاتين صورة .	أريد أن أشتري فيلم كوداك ذاتي الرجوع فئة ست وثلاثين صورة .	عايز أشتري فيلم كوداك 36 صورة.
لو سمحت أمشي .	من فضلك اذهب .	من فضلك روح.
تمام، حضرتك، من فضلك اقفل المكالمة وانا هبلغك لما المكالمة تشتغل.	حسناً سيدي . من فضلك ضع السماعة وسأدعك تعرف متى قمت بإيصال المكالمة .	حاضر يا فندم. حط السماعة وأنا هبلغك لما أوصل المكالمة.
الابتسامة مفهومة بأى لغة .	كل شخص يبتسم بنفس اللغة .	كل واحد بيبتسم بنفس اللغة.
عايز كيرلي عالخفيف، لو سمحت.	أريد تموج خفيف لشعري , من فضلك .	عايز تمويجة خفيفة لشعري، من فضلك.
على اى حال، مفروض احجز نفس الرحلة؟	علي أي حال ، هل لي أن أحجز نفس الرحلة لأن هناك مكان لك .	على أي حال، ممكن أحجز نفس الرحلة لأن في مكان لك.
عايز اتأكد من الوقت اللي ساب فيه .	أريد أن أتأكد من الوقت الذي يغادر فيه .	عايز أتأكد من معاد المغادرة.
دلوقتي، اللوحه ديه خاصة جدا . عملها تسوروتارو كاتاووكا . هو معروف كفنان عالمي .	الآن ، هذه اللوحة خاصة جداً . رسمها تسوروتارو كاتاأوكا . إنه معروف بأنه فنان عالمي .	دلوقتي، اللوحة دي خاصة جداً. رسمها تسوروتارو كاتاأوكا. معروف كفنان عالمي.
بكرة.	الغد .	بكرة.
بالنسبة للتامين أنا عايز تأمين شامل.	للتأمين أريد نسبة غطاء كاملة لحوادث التصادم .	للتأمين عايز تغطية كاملة لحوادث التصادم.
بنفطر كل يوم الصبح الساعة سبعه ما عدا في الاجازات .	نتناول الإفطار في السابعة كل صباح ما عدا عطلة نهاية الأسبوع .	بنفطر الساعة سبعة كل يوم ما عدا الويك إند.
ده صنع فين؟	في أي الدول صنعت هذه .	دي مصنوعة فين؟
كانت بتمطر كل الاسبوع ده؟	هل ستمطر طوال هذا الأسبوع ؟	هتمطر طول الأسبوع ده؟
ايه رأيك في الموديلات البلاستيك ديه؟	ماذا عن هذه النماذج البلاستيكة ؟	إيه رأيك في النماذج البلاستيك دي؟
فين أكبر هايبر ماركت في المدينة دي؟	أين أكبر متجر في هذه المدينة ؟	فين أكبر محل في المدينة دي؟
ابعت ده لليابان بالتلغراف.	أرسل هذا في برقية إلى اليابان .	ابعت ده في برقية لليابان.
لو سمحت وريني كرسيا .	من فضلك دلني علي مقعدي .	من فضلك وريني كرسيي.
حجمه صغير و ظريف قوي .	إنها صغيرة الجسم وذكية .	هي صغيرة وذكية.
انا ممتن قوي ليك .	كما أنا ممتن كثيراً لك .	برضه أنا ممتن جداً ليك.
تكلفة الأوضة ست آلاف ين في اللية.	سعر الغرفة هو ستة آلاف ين في الليلة .	سعر الأوضة 6000 ين في الليلة.
ده عالطريق السريع ولا في المدينة؟	هل هذا على الطريق السريع أم في المدينة ؟	ده على الطريق السريع ولا في المدينة؟
في أي رسايل ليا؟	أية رسائل لي ؟	في رسايل لي؟
عاوز أرجع الفلوس.	أريد أن استرجع المال .	عايز أسترجع الفلوس.
كنت عاوز أعمل فحص طبي.	أريد الخضوع لفحص طبي .	عايز أعمل كشف طبي.
انا فعلا، أسف .	أنا حقا آسف .	أنا فعلاً آسف.
إحنا هنا في زيارة. ابننا عايش في سياتل.	نحن هنا في زيارة . ابننا يعيش في سيتل .	احنا هنا في زيارة. ابننا عايش في سيتل.
انا عاوز الازرق، لو عندك .	أفضل واحدة زرقاء ، إذا كان لديك .	أفضل واحدة زرقاء، لو عندك.
عايز الغي طلبي لباقي الاطباق عشان حتاخد وقت كتير .	أريد إلغاء الأطباق الأخرى لأنه يستغرق وقتاً طويلاً .	عايز أكنسل الأطباق التانية لأنها بتاخد وقت طويل.
فين زحليقة التلج؟	اين منحدر التزلج على الجليد ؟	فين منحدر التزلج على الجليد؟
هو هناك على الشمال.	إنه للأسفل هناك على اليسار .	هو تحت هناك على الشمال.
ضهر الكرسي بتاعي مش بيتحرك.	المقعد خلف الكرسي الخاص بي لا يتحرك .	الكرسي ورا الكرسي بتاعي ما بيتحركش.
شكرا. ده معناه إنه الصبح بدري لما نوصل. تفتكر هاقدر آخد المترو لوسط البلد؟	شكراً . هذا يعني أننا سنصل باكر صباحاً . هل تظن أنني أستطيع أن أستقل قطار الأنفاق لوسط المدينة ؟	شكراً. ده معناه إننا هنوصل بدري الصبح. تفتكر ممكن أركب المترو لوسط البلد؟
لا، لأ. انا عايز أشوفك.	كلا ، لا . أود أن أراك .	لا، لا. عايز أشوفك.
قولي شنطة السفر عاملة إزاي، لو سمحت.	أخبرني كيف تبدو الأمتعة ، من فضلك ؟	قول لي شكل الشنط إيه، من فضلك؟
دي بوابة سبعة.	إنها البوابة السابعة .	دي البوابة السابعة.
خمسه و تلاتين ساعة، طلع منهم ساعة للغدا . و ايه نظام شركتكم في اليابان؟	خمس وثلاثون ساعة باستثناء ساعة للغداء . ماذا عن شركتكم في اليابان ؟	خمس وثلاثين ساعة ما عدا ساعة الغداء. إيه أخبار شركتكم في اليابان؟
عايش لوحدك؟	هل تعيش بمفردك ؟	عايش لوحدك؟
شويه كمان من الرقبة، لو تكرمت .	بعد الرقبة قليلا , من فضلك .	بعد الرقبة شوية، من فضلك.
ممكن أبدل البوت ده بواحد أصغر؟	هل أستطيع استبدال هذا الحذاء ذو الرقبة بواحد اصغر ؟	ممكن أبدل الجزمة دي بواحدة أصغر؟
بأحب لعبة الصور المقطعة .	أريد أحجية الصور المقطوعة .	عايز لعبة بازل.
اكل كويس؟	طعام طيب ؟	الأكل حلو؟
ده ارتفاعه الفين و ربعميت متر .	إن ارتفاعه ألفان وأربعمائة متر .	ارتفاعه 2400 متر.
الضهر.	الساعة الثانية عشر ظهراً .	الساعة 12 الظهر.
عندك اى ا قتراحات؟	هل لديك أية مقترحات ؟	عندك أي اقتراحات؟
عاوز العدة بتاعة البايب . من فضلك .	أعطني أداة أنبوب ، من فضلك .	اديني أداة الأنبوبة، من فضلك.
انا متأخر شوية، ده كويس؟	لقد بكرت قليلا , هل كل شيء على ما يرام ؟	جيت بدري شوية، كل حاجة تمام؟
اسف، حنتأخر تلاتين دقسقة .	آسف ، و لكننا سنتأخر ثلاثين دقيقة .	آسف، بس هنتأخر نص ساعة.
بسيط.	قطعة صغيرة فقط .	حتة صغيرة بس.
شكرا. آه، فهمت إيه الي حصل.	شكراً . آه ، أفهم ما حدث .	شكراً. آه، فهمت اللي حصل.
تمام . وانتي اخبارك ايه، يا مدام؟	بحالة جيدة ، وكيف حالك أنت ، يا سيدتي ؟	أنا كويس، وأنتِ أخبارك إيه يا مدام؟
جو جميل.	جو لطيف .	الجو لطيف.
ممكن أحتفظ بالمنيو بتاعتكم كتذكار؟	هل أستطيع الاحتفاظ بقائمة طعامكم كتذكار ؟	ممكن أحتفظ بقائمة الأكل كتذكار؟
بييجي معاه سلطات و اختيار اما بطاطس مشوية او بطاطس محمرة .	هذا يأتي مع طبق السلطة واختيار بين البطاطس المشوية أو المحمرة .	ده بييجي مع طبق سلطة واختيار بين البطاطس المشوية أو المحمرة.
انت اميركي؟	هل أنت أمريكي ؟	أنت أمريكي؟
إيه المشهور هنا؟	ما هي الأماكن المشهورة حول هذه المنطقة ؟	إيه الأماكن المشهورة هنا؟
ممكن تيجي معايا، من فضلك؟	هل من الممكن أن تأتي معي من فضلك ؟	ممكن تيجي معايا من فضلك؟
ممكن تقولى الإعلان قال إيه تاني، لو سمحت؟	هل من الممكن أن تخبرني مرة أخرى ماذا تضمن الإعلان , من فضلك ؟	ممكن تقول لي تاني الإعلان كان بيقول إيه؟
واحد من المجموعة الحمرا ديه، من فضلك .	واحدة من هذه العلبة الحمراء من فضلك .	واحدة من العلبة الحمرا دي، من فضلك.
من فضلك بلغة اني في انتظار مكالمته .	من فضلك قل له أنني أنتظر مكالمته .	قول له إن أنا مستني مكالمته.
ممكن تقولي حنروح فين في الرحلة دي؟	هل يمكنك أن تخبرني أين سنذهب في هذه الجولة ؟	ممكن تقول لي هنروح فين في الجولة دي؟
اتكلف كام لو سبت العربية؟	ما التكلفة إذا تركت السيارة ؟	تكلفتها كام لو سبت العربية؟
انا في شغل .	أنا في عمل .	أنا في الشغل.
عايز أحجز ملعب التنس بكرة لمده ساعة .	أود أن أحجز ملعب تنس لمدة ساعة غدا .	عايز أحجز ملعب تنس لمدة ساعة بكرة.
خلينا نروح نتفرج عالحاجات المعروضه .	دعنا نذهب للتفرّج على نوافذ المحلات .	يلا نتمشى ونتفرج على الفاترينات.
لا مؤاخذة، أقدر أغسل ايديا فين؟	عذرا ، أين يمكنني أن أغسل يدي ؟	معلش، فين ممكن أغسل إيدي؟
بكام تذكرة درجة أولى لأدنبره، لو سمحت؟	ما سعر تذكرة درجة أولى إلى إدنبره , من فضلك ؟	كام سعر تذكرة درجة أولى لإدنبره، من فضلك؟
أنهو الأرخص ده ولا ده؟	أيهما أرخص : هذا أم ذاك ؟	أيهما أرخص: ده ولا ده؟
إنت ف عربية كام؟	ما الحافلة التي كنت على متنها ؟	كنت راكب أي أتوبيس؟
انا بأترجى اني اشوفك تاني نفس الوقت السنه الجايه .	أتطلع إلى رؤيتك ثانية حوالي هذا الوقت العام القادم .	متشوق أشوفك تاني في نفس الوقت السنة الجاية.
لو انت عايز . ممكن نفضل هنا .	إذا كنت تودّ ، بإمكاننا الاستراحة هنا .	لو تحب، ممكن نرتاح هنا.
من تمانية لتمانية وربع.	من ثمانية إلى ثمانية خمسة عشر .	من الساعة 8 إلى 8:15.
حروح من كاليه لدوفر بالعبارة.	سأذهب من كالية إلى دوفر بالمعدية .	هسافر من كالية لدوفر بالعبّارة.
عندنا المنتج الجديد ده اللي مصمم للستات اللي بتشتغل.	لدينا هذا المنتج الجديد المصمم للنساء العاملات .	عندنا المنتج الجديد ده مصمم للسيدات العاملات
ممكن تغيرلي ورقة العشرة دولار؟	هل يمكنك أن تغير فاتورة بعشرة دولارات ؟	ممكن تفكلي ورقة بعشرة دولار؟
لو سمحت رشح مطعم كويس.	من فضلك رشح لي مطعم جيد .	ممكن ترشح لي مطعم كويس؟
عايز أأجر شقة مفروشة لمدة شهر.	أود أن أستأجر شقة مفروشة لمدة شهر .	عايز أأجر شقة مفروشة لشهر.
فين محطة البنزين؟	أين محطة البنزين ؟	فين محطة البنزين؟
سلام. ممكن تقولي إزاي ممكن أجيب تذاكر للعبة النهاردة؟ احنا هانفضل في منهاتن دلوقتي.	أهلاً . هل تقول لي كيف أحصل على تذاكر لمباراة اليوم ؟ نحن نقيم في مانهاتن الآن .	أهلاً. ممكن تقول لي إزاي أجيب تذاكر لماتش النهارده؟ إحنا ساكنين في مانهاتن دلوقتي.
تلاتة بيرة درافت، لو سمحت.	ثلاث كؤوس جعة براميلي من فضلك .	تلات كوبايات بيرة براميلي لو سمحت.
وصل سلامي لأهلك بالنيابة عني، لو سمحت.	ارسل تحياتي إلى والديك ، من فضلك .	سلم لي على أهلك، من فضلك.
ايوه، معاك سوجاكو ميانيشي في غرفة تلتميه و تلاته .	نعم هذا سوجاكو ميانيسشي غرفة ثلاثة صفر ثلاثة .	أيوة ده سوجاكو ميانيسشي أوضة تلاتة صفر تلاتة.
عايزين نعزمك على العشا بكره بليل.	نود أن ندعوك للعشاء مساء الغد .	عايزين نعزمك على العشا بكرة بالليل.
ضاعو مني امبارح العصر .	لقد فقدتهم عصر الأمس .	ضيعتهم العصر امبارح.
أماكن البلكون بكام؟	ما تكلفة المقاعد الخاصة بالشرفة ؟	كام سعر المقاعد في البلكونة؟
فاتورتك ميه و خمين دولار و خمسه و اربعين سنت .	فاتورتك تبلغ مائة و خمسين دولاراً و خمس و أربعين سنتاً .	فاتورتك 150 دولار و45 سنت.
بكام ديه؟	بكم هذه ؟	بكام دي؟
أنا عايز كيرلي.	أود عمل تجعيد للشعر .	عايز أعمل كيرلي لشعري.
بكرة حنعمل حفة ودية . خليك معانا، مش عايز؟	سنقيم حفلاً ودياً غداً . شاركنا ، هل ستحضر ؟	هنكون عندنا حفلة بكرة. تعال، هتحضر؟
عايز اخد نفس الطيارة في اول يوليه .	أود أن آخذ الرحلة ذاتها في الأول من يوليو .	عايز آخد نفس الرحلة في الأول من يوليو.
بعدين، انا حأدفع فيه بالدولار و بالين .	هكذا ، سأدفع ثمنها بالدولار والين .	تمام، هادفع بالدولار والين.
ده متبل مشطشط؟	هل هذا المتبل حار ؟	المتبل ده حار؟
أنا جاي من اليونان.	أنا من اليونان .	أنا من اليونان.
ممكن توصفلي الطريق لأقرب أجرخانة، من فضلك؟	أيمكن أن تدلّني على الطريق إلى أقرب متجر لبيع الأدوية والمرطبات ، من فضلك ؟	ممكن تدلني على أقرب صيدلية، من فضلك؟
عايز ا حجز ترابيزه لنفرين عالساعة سبعة، إذا سمحت .	أود حجز مائدة لفردين في الساعة السابعة , من فضلك .	عايز أحجز طربيزة لشخصين الساعة سبعة، من فضلك.
خلينا نروح المطعم بالتاكسي .	لنذهب إلى المطعم بسيارة الأجرة .	خلينا نروح المطعم بالتاكسي.
فيه هايبر ماركت قريب من هنا؟	هل توجد أية متاجر كبرى بالقرب من هنا ؟	في محلات كبيرة قريبة من هنا؟
عندك نوع عيش ايه؟	ما نوع الخبز لديكم ؟	عندكم إيه أنواع العيش؟
علطول، إذا سمحت .	الآن ، من فضلك .	دلوقتي، من فضلك.
من فضلك قوللي المكان اللي اوصلك فيه .	من فضلك أخبرني مكان الاتصال بك .	ممكن تقول لي فين مكان الاتصال بيك؟
ممكن تظهر البوابة دي في الصورة؟	هل يمكنك أن تشمل تلك البوابة في الصورة ؟	ممكن تشمل البوابة دي في الصورة؟
أنا عايز على الأقل نص ساعة عشان أجهز شنطي.	احتاج نصف ساعة على الأقل لإعداد حقائبي .	محتاج نص ساعة على الأقل أحضر شنطي.
حوالي تمانية وخمسين، لو ما عندكش مانع.	في حدود الثامنة وخمسين دقيقة ، إذا لم يكن لديك مانع .	حوالي الساعة 8 و50 دقيقة، لو مفيش مانع.
ممكن تحجزلي الكرسي ده؟	هل يمكنك أن تحجز هذا المقعد لي ؟	ممكن تحجز لي الكرسي ده؟
حأبلغها تكلمك اول ما ترجع.	سوف أخبرها بأن تتصل بك بمجرد أن تصل .	هقولها تكلمك أول ما توصل.
عايز اسيب شنطي .	أود ترك أمتعتي .	عايز أسيب شنطي.
الهاف بورد بكام؟	ما سعر نصف الإقامة ؟	كام سعر نص الإقامة؟
ممكن دوا؟	هل يمكنني الحصول على دواء ؟	ممكن أخد دواء؟
شكرا جزيلا ليك علشان سقت بيا لهنا بعد ساعات . انا فعلا ممنون لمساعدتك .	أشكرك على إيصالي لهنا بالسيارة بعد ساعات . أنا أقدر مساعدتك حقيقةً .	شكراً على توصيلة العربية بعد الشغل. فعلاً مقدر مساعدتك.
انا معايا حاجات شخصية بس في الشنطة دي.	ليس بحقيبتي هذه سوى متعلقاتي الشخصية .	شنطتي دي مافيهاش غير حاجاتي الشخصية.
الدواء ده فعال بيقلل الحمى؟	هل هذا الدواء فعّال في تخفيف حدة الحمى ؟	الدواء ده فعال في تخفيف الحمى؟
معاك فلوس فكة؟	هل معك " فكة " صغيرة ؟	معاك فكة صغيرة؟
اريزونا تشبه الساونا .	أريزونا تشبه حمّام بخار .	أريزونا زي حمام بخار.
لأ، انا حاسس اني محظوظ، ياللا.	لا ، أشعر أنني محظوظاً . هيا .	لا، حاسس إني محظوظ. يلا.
القطر بتاعك حيطلع من رصيف تمانية.	سيغادر قطارك من الرصيف رقم ثمانية .	قطارك هيمشي من رصيف رقم تمانية.
ممكن تجيبلي سماعات ودن؟	هل يمكنك أن تحضر لي سمّاعات للأذن ؟	ممكن تجيب لي سماعات للأذن؟
لأ، انا عملت كله بنفسي . ديه واحده من هواياتي . انا بس بأحب شغل الجناين .	لا ، قمت بها جميعها بنفسي . إنها إحدى هواياتي . أحب فقط عمل البساتين .	لا، عملتهم كلهم بنفسي. دي واحدة من هواياتي. بحب الزراعة.
انا حأدفع لأصحابي، كمان .	سأدفع نيابة عن أصدقائي , أيضاً .	هدفع عن صحابي كمان.
نفسي موت أشرب بيرة كتير .	نفسي تتوق إلى جرعة جعة كبيرة .	نفسي في بيرة كبيرة.
الغسيل اللي كنت سايبه ينشف في الحمام مش موجود.	لقد ضاع الغسيل الذي كنت علقته في الحمام ليجف .	الغسيل اللي كنت حاطه ينشف في الحمام ضاع.
شكله مبهرج قوي .	يبدو مبهرجا .	شكله مبهرج.
ممكن تاخد صورة معانا؟	هل لك أن تسمح بالتقاط صورة لك معنا ؟	ممكن تاخد صورة معانا؟
ممكن نخليهم شيكين.	هل يمكن أن نحرر شيكين ؟	ممكن نعمل شيكين؟
ممكن تقولي إيه أسرع طريقة عشان أبعته؟	هل أخبرتني عن أسرع طريقة لإرسال ذلك ؟	ممكن تقولي أسرع طريقة لإرسال ده؟
ايوه، سلطة خضرا، إذا سمحت .	أجل ، سلطة خضراء من فضلك .	أيوة، سلطة خضراء من فضلك.
لو سمحت أطلب تسعة عالتليفون ده .	من فضلك اطلب الرقم تسعة على هذا الهاتف .	اطلب رقم تسعة على التليفون ده، من فضلك.
منين أسجل للقبول؟	من أين يجب أن أحصل على الإذن ؟	أجيب الإذن منين؟
بشكرك جدا جدا. إزاي أقدر أوصل للفندق؟	شكرا جزيلا لك . كيف يمكنني الوصول إلى الفندق ؟	شكراً جزيلاً. إزاي أوصل للفندق؟
عندنا قهوة، شاي، عصير برتقان، و حاجات كتيرة . تحب تشرب ايه؟	لدينا قهوة ، شاي ، عصير برتقال ، وما إلى ذلك . ماذا تحب ؟	عندنا قهوة، شاي، عصير برتقال، وهكذا. تحب إيه؟
فيه اى طيارات تانية متاحة النهاردة؟ لازم اكون في لوس انجلوس النهاردة بليل .	هل توجد هناك أية رحلات طيران أخرى متوفرة اليوم ؟ لا بد أن أكون في لوس أنجلوس مساء اليوم .	في رحلات طيران تانية النهارده؟ لازم أكون في لوس أنجلوس بالليل.
اتمنى ان اللون و الستايل ده يعجبوك .	أتمنى أن يعجبك هذا اللون والطراز .	أتمنى يعجبك اللون والطراز ده.
أنا آسف.	آسف ، ليس لدي أوراق مالية فئات صغيرة .	آسف، ماعنديش فكة.
انا أسف . انا اديته لواحد تاني قاعد في نفس الاوضه .	أنا آسف . لقد أعطيتها لشخص آخر يقيم في نفس الغرفة .	آسف. اديتها لحد تاني ساكن في نفس الأوضة.
ممكن بأى طريقة تحاول تشرحلي بالانجليزي انت بتشتكي من ايه؟	هل يمكنك بطريقة ما أن تصف لي مرضك بالإنجليزية ؟	ممكن توصف لي مرضك بالإنجليزي؟
عندي بنطلون مقلم .	لقد خلعت البنطلون .	شلت البنطلون.
انا اكلت اكتر من اللازم .	أكلت كثيرا نوعا ما .	أكلت كتير شوية.
كاسين فراوله مجمده بالكريمة و البيض و السكر بارفيه .	اثنان من حلوى الفراولة .	اتنين من حلوى الفراولة.
تعرف زوق صاحبك في اللبس؟	هل تعرف ذوق صديقك في الملابس ؟	تعرف ذوق صاحبك في اللبس؟
الوقت اللي حتبتدي فيه اتنين الضهر زى ما حجزت . على اى حال فيه حفلة تانية قربت تنتهي .	وقت بدايتك هو اثنين ظهراً كما حجزت . ولكن حفلة أخرى ستنتهي بعد قليل .	معاد بدايتك الساعة 2 الظهر زي ما حجزت. بس في حفلة تانية هتخلص بعد شوية.
لازم أروح المحطة حالا.	لابد أن أذهب إلى المحطة الآن .	لازم أروح المحطة دلوقتي.
مليت استمارة الوصول؟	انتهيت من ملء بطاقة النزول من الطائرة ؟	خلصت ملء بطاقة النزول؟
تذكرتين كبار و اتنين اطفق اقل من اتناشر، من فضلك .	من فضلك ، اثنين بالغين وطفلين تحت اثنى عشر عاماً .	لو سمحت، اتنين كبار وطفلين تحت 12 سنة.
خلي بالك.	خذ حذرك .	خلي بالك.
ده مصنوع من ايه؟	مما صنع هذا ؟	ده معمول من إيه؟
عاوز ده.	أردت ذلك .	كنت عايز ده.
ممكن اشرب سبرايت؟	هلا أحضرت لي زجاجة سبرايت ؟	ممكن تجيب لي زجاجة سبرايت؟
دي أعاصير. أول مابتضرب اليابان بتسببلنا كوارث كتير.	أنها اعاصير التيفون . بمجرد أن تضرب اليابان تسبب لنا العديد من الكوارث .	دي أعاصير التيفون. أول ما تضرب اليابان بتسبب كوارث كتير.
لمؤاخذة، هو الفيلم ده حيخلص إمتى؟	معذرة , متي ينتهي هذا الفيلم ؟	معذرة، الفيلم ده بيخلص إمتى؟
في قطر سريع لبرلين؟	هل هناك قطار سريع لبرلين ؟	في قطر سريع لبرلين؟
أنا عندي حمى.	أشكو من حمى .	عندي حمى.
حاخد شريحة لحم بقري.	أريد كباب .	عايز كباب.
فيه كتير جدا لدرجة اني مش عارف اختار واحد .	إن عددهم كثير للغاية حتى إنني لا أعرف أي واحدة أختار .	عددهم كبير جداً ومش عارف أختار أي واحدة.
خليني أشوف دي.	دعني أرى ذلك .	خليني أشوف ده.
أنا كمان.	و أنا كذلك .	وأنا كمان.
ممكن تقوللي ازاي أروح الاوبرا؟	هل يمكنك أن تخبريني كيف أستطيع أن أصل إلى الأوبرا ؟	ممكن تقولي لي إزاي أوصل للأوبرا؟
القطرات بتتحرك من كينجز كروس.	تغادر القطارات من كينجز كروس .	القطارات بتطلع من كينجز كروس.
ينفع أخد خصم على ده.	أريد أن أحصل على تعويض لذلك .	عايز تعويض عشان ده.
انت شفت جاكت ازرق؟ انا حطيتة عالكرسي ده .	هل رأيت معطف أزرق ؟ وضعته على هذا الكرسي .	شفت جاكيت أزرق؟ كنت حاطه على الكرسي ده.
عايز بكرات صغيرة ولا كبيرة؟	هل تفضل ماسكات للشعر أصغر أم أكبر ؟	تحب ماسكات للشعر أصغر ولا أكبر؟
فين محل الهدايا؟	أين محل الهدايا ؟	فين محل الهدايا؟
لو مؤاخذه . ممكن اخد خريطة المدينة؟	عذراً . هل يمكنني الحصول على خريطة للمدينة ؟	معذرة. ممكن خريطة للمدينة؟
وقت ركوب الطيارة لرحلة طيران يونايتد رقم واحد سبعة خمسة اتأجل. استنى عشر دقايق من فضلك.	تأخر ميعاد ركوب طائرة رحلة يونايتد إيرلاينز واحد سبعة خمسة . رجاء الانتظار عشر دقائق .	رحلة يونايتد إيرلاينز رقم 175 اتأخرت. رجاء الانتظار 10 دقايق.
فين محطة البنزين؟	أين محطة البنزين ؟	فين محطة البنزين؟
انا مش متأكد.	لست متأكداً .	مش متأكد.
وريني شنطة رجالي .	أرني حافظة رجالي .	وريني حافظة رجالي.
فيه بنك على بعد تقاطعين.	يوجد بنك بعد عمارتين إلى الأمام .	في بنك بعد عمارتين قدام.
الميني جيب مع البوت مش هايقدم ابدا.	إن الجونلات القصيرة ومعها الأحذية الطويلة لن تنقضي موضتها .	الجيب القصيرة مع الجزمة الطويلة مش هتروح موضتها.
فين مكتب الخطوط الجويه الاسرائيلية؟	أين مكتب شركة طيران أمريكا المحدودة ؟	فين مكتب شركة طيران أمريكا المحدودة؟
ممكن أشوف ده؟	هل من الممكن أن أرى هذا ؟	ممكن أشوف ده؟
لا مؤاخذة . ممكن تقوللي امتى القطر حيسيب بوسطن؟	معذرة , هلا أخبرتني متى سيغادر القطار مدينة بوسطن ؟	معذرة، ممكن تقولي لي القطر بيمشي من بوسطن إمتى؟
إحنا بنكتب كروت للسنة الجديد وبنبعتهم. بيوصلوا واحد يناير.	نحن نكتب بطاقات العام الجديد ونرسلها بالبريد . يتم تسليمهم في الأول من يناير .	بنكتب بطاقات السنة الجديدة ونبعتها بالبريد. بيوصلوا في الأول من يناير.
عملت مكالمة لطوكيو و قالولي انهم مش عايزينه .	أجريت مكالمة لطوكيو وقالوا إنهم لا يريدونها .	كلمت طوكيو وقالوا إنهم مش عايزينها.
تقدر تشتري التذاكر عند شباك تذاكر المسرح .	بإمكانك شراء التذاكر من شباك تذاكر المسرح .	تقدر تشتري التذاكر من شباك تذاكر المسرح.
أيوة، أكيد . حتفضل تلات ليالي؟	نعم ، بكل تأكيد . هل ستقيم ثلاث ليال ؟	أيوة، أكيد. هتقعد تلات ليالي؟
انا ماشي بكره الصبح.	سأدفع الفاتورة صباح غد .	هدفع الفاتورة بكرة الصبح.
ديه رايحة سيدني؟	هل هذا يذهب إلى سيدني ؟	ده بيروح سيدني؟
إزاي أولع النور ده؟	كيف يمكنني فتح هذا النور ؟	إزاي أشغل النور ده؟
عندك الورق اللي يلزق وبنكتب عليه؟	هل لديك طوابع ؟	عندك طوابع؟
اى طيارة بتوصل الاول في مدينة نيويورك؟	أية طائرة تصل مبكراً إلى مدينة نيويورك ؟	أي طيارة بتوصل بدري لنيويورك؟
انه رحة الاحسن علشان اشوف اشهر الاماكن؟	ما هي أفضل جولة حتى أرى أشهر الأماكن ؟	إيه أحسن جولة عشان أشوف الأماكن المشهورة؟
القهوة بالسكر.	قهوة بالسكر .	قهوة بسكر.
حيبقى عندك إيه؟	ماذا ستتناول ؟	هتاكل إيه؟
ده معمول من الجلد؟	هل هذا مصنوع من الجلد ؟	ده معمول من جلد؟
القطر اللي جاي إمتى؟	متى يقوم القطار التالي ؟	القطر الجاي بيطلع إمتى؟
في اى اوتوبيسات بتعمل رحلة لمعالم المدينة؟	هل هناك أي حافلات لمشاهدة المعالم ؟	في أتوبيسات لمشاهدة المعالم؟
من اى طريق المتحف؟	أي طريق يؤدي إلى المتحف ؟	أي طريق يودّي للمتحف؟
ممكن توريني فاتورتي، إذا سمحت؟ ايه المبلغ ده؟	هل لك أن تريني فاتورتي من فضلك ؟ على أي شيء هذه الرسوم ؟	ممكن توريني فاتورتي، من فضلك؟ الرسوم دي على إيه؟
برد قوي الاوضه ديه .	هذه الغرفة شديدة البرودة .	الأوضة دي ساقعة جداً.
عندي مرض مزمن.	أنني أعاني من عرض مزمن .	عندي عرض مزمن.
معاك تصريح؟	هل عندكم ثمر البرسمون ؟	عندكم كاكي؟
هو إنت بتاخذ شيكات سياحية؟	هل تقبلون شيكات سياحية ؟	بتقبلوا شيكات سياحية؟
هو الأتوبيس ده بيروح للكرمل؟	هل هذا الأتوبيس يذهب إلى كارميل ؟	الأتوبيس ده بيروح كارميل؟
عندك حاجة أحسن من كده؟	هل لديكم أي شيء ذا جودة أفضل ؟	عندكم حاجة بجودة أحسن؟
عايز ايشارب لمامتي . هى في الستينات.	أبحث عن وشاح لأمي . إنها في الستين من عمرها .	عايز ايشارب لمامتي . هى في الستينات.
أحود شمال؟	هل انعطف يساراً ؟	أعمل شمال؟
مافيش مشكلة . لو انت جيت في خمسة مارس، حتستمتع بالفرجة على فيلم علمي لأننا بيكون عندنا يوم مفتوح في اول جمعة من كل شهر .	لا توجد مشكلة . إذا حضرت في الخامس من سبتمبر ، فسيكون بإمكانك الاستمتاع بعرض فيلم علمي لأن عندنا يوماً خاصاً مفتوحاً أول يوم جمعة من كل شهر .	مفيش مشكلة. لو جيت في الخامس من سبتمبر، هتقدر تستمتع بعرض فيلم علمي لأن عندنا يوم مفتوح أول جمعة من كل شهر.
ممكن أحط الجواب فيه؟	هل لي أن أرفق خطاباً فيها ؟	ممكن أرفق جواب فيها؟
من فضلك أطلبلي الاسعاف .	من فضلك , أطلب لي الإسعاف .	من فضلك، اطلب لي الإسعاف.
انزل هنا، و اركب اوتوبيس رقم سته .	اهبط هنا ، وانتقل إلى الحافلة رقم ستة .	انزل هنا، وركب أتوبيس رقم 6.
ممكن نرقص؟	هيا نرقص .	يلا نرقص.
عايزة كريم اشيل بيه الماكياج .	أريد بعضاً من كريم التنظيف .	عايز شوية كريم تنظيف.
سمعت الإعلان بتاع ان رحلة الطيران ميه و سبعة اتلغت .	سمعت الإعلان عن إلغاء رحلة رقم واحد صفر سبعة .	سمعت الإعلان عن إلغاء رحلة رقم 107.
ينفع اسأل ان كان حد يقدر ياخد الرحلة اللي بعد ديه؟	هل يمكنك أن تسأل عن إمكانية ركوب طائرة تالية ؟	ممكن تسأل عن إمكانية ركوب الطيارة اللي بعديها؟
حأرجعلك لما تكون مشغوليتك أقل .	سأعود إليك عندما تكون أقل انشغالاً .	هارجع لك لما تكون فاضي شوية.
السمك اللي انت تقصده اسمه فوجو . ده فيه سم قاتل في كبده و في المبيض .	إن السمكة التي تعنيها هي فوجو . فيها سم زعاف في كبدها ومبايضها .	السمكة اللي تقصدها هي فوجو. فيها سم في الكبد والمبايض بتاعتها.
ممكن تسلمه على بكرة؟	هل يمكن أن توصله بحلول الغد ؟	ممكن توصله بحلول بكرة؟
آه، الممثل الي بيلعب دور البطولة ممتاز.	نعم ، إن الممثل الذي يؤدي الدور الرئيس ممتاز .	أيوة، الممثل اللي بيلعب الدور الرئيسي ممتاز.
بأخطط ادفع فواتير احتياجاتي اليومية، فمن فضلك قولي عنوان و اسم الشخص المسئول .	سأخطط لإرسال فواتير حاجياتي اليومية ، لذا من فضلك أخبرني العنوان و اسم الشخص المسئول من فضلك .	هخطط أبعت فواتير الحاجات اليومية بتاعتي، فياريت تقولي العنوان واسم الشخص المسئول.
ميامي .	ميامي .	ميامي.
إملا الاستمارة دي.	املأ هذه الاستمارة .	املأ الاستمارة دي.
ماقررتش لسه.	لم أقرر بعد .	لسه مقررتش.
ممكن اخد شنطي اما اوصل؟	أيمكنني أخذ أمتعتي في نهاية الرحلة ؟	ممكن آخذ شنطي في نهاية الرحلة؟
عندي احتقان في الزور .	أصبت بالتهاب في الحلق .	عندي التهاب في الزور.
معايا رقم حساب البنك .	لدي رقم حسابي المصرفي .	معايا رقم حسابي البنكي.
فيه تلاتين كلمة. عشان كده، تلاتة دولار، لو سمحت.	بها ثلاثون كلمة . لذلك ثلاثة دولارات من فضلك .	فيها تلاتين كلمة، يبقى ثلاثة دولار من فضلك.
اقدر اوصل لقاعة الحفلات الموسيقية عالساعة سته؟	هل بإمكاني الوصول إلى قاعدة الحفلات الموسيقية في الساعة السادسة ؟	ممكن أوصل لقاعدة الحفلات الموسيقية الساعة ستة؟
لأ، دقيقة واحدة . متهيألي اني حأكون هنا حوالي تلات سنين .	لا ، فقط لأشهر قليلة . أعتقد أنني سأكون موجوداً لمدة ثلاث سنوات تقريباً .	لا، بس لشهور قليلة. أعتقد هفضل هنا حوالي ثلاث سنين.
من فضلك قصقص لي شعري من قدام إينش فوق الحواجب .	من فضلك قص شعري بمقدار بوصة فوق الحاجبين .	من فضلك قص شعري بمقدار بوصة فوق الحواجب.
حطيت طابع عالبطاقة البريدية؟	هل قمت بوضع طابع بريد على الكارت البريدي .	حطيت طابع على الكارت البريدي؟
اديني دولار .	أعطني دولارا .	اديني دولار.
كم تمن الخدمة؟	كم تبلغ رسوم هذه الخدمة ؟	الرسوم بتاعة الخدمة دي كام؟
ناوي تأجر عربية جولف؟	هل ستقوم باستئجار عربة جولف ؟	هتأجر عربة جولف؟
الرقم هو صفر تلاته تلاته اتنين تلاته اربعة واحد اتنين تلاته اربعه .	الرقم هو صفر ثلاثة ثلاثة اثنان ثلاثة أربعة واحد اثنان ثلاثة أربعة .	الرقم هو صفر تلاته تلاته اتنين تلاته اربعة واحد اتنين تلاته اربعه .
أدخل المعبد إزاي؟	كيف يمكنني الوصول للمعبد ؟	إزاي أوصل للمعبد؟
شخص واحد جاي بعدين.	سيأتي شخص واحد فيما بعد .	في واحد هييجي بعدين.
ده زميلي .	هذا زميلي .	ده زميلي.
ممكن لو سمحت ترسملي خرطة واضحة من هنا؟	من فضلك ، هل رسمت لي خريطة بسيطة من هنا ؟	من فضلك، ترسمني خريطة بسيطة من هنا؟
لو سمحت ابعت شنطتي هنا.	من فضلك أرسل بريدي إلى هنا .	من فضلك بعت بريدي هنا.
بيمشي من موقف رقم إتنين.	إنها تغادر من محطة حافلات رقم اثنان .	بتطلع من محطة أتوبيس رقم 2.
ديه مش تفاحة ديه خوحة .	هذه ليست تفاحة ولكنها خوخة .	دي مش تفاحة، دي خوخة.
آه، تقدر توقفعند أي محطة بين هنا وشيكاغو.	نعم , يمكنك أن تتوقف في أي محطة ما بين هنا وشيكاغو .	أيوة، ممكن توقف في أي محطة بين هنا وشيكاغو.
لو سمحت أدخل أوضة القياس هناك .	من فضلك استعمل غرفة القياس هناك .	من فضلك، استعمل غرفة القياس هناك.
ممكن تضيق البنطلون ده؟	هل لديك أي جولات أخرى ؟	عندك جولات تانية؟
بقالك اد ايه في باريس؟	كم المدة التي قضيتها في باريس ؟	قضيت قد إيه في باريس؟
انت كده بتكلفني زيادة .	أنت تزيد علىّ في السعر .	أنت بتغلي عليّ في السعر.
عندكم اى معدلات فائدة اسبوعية.	هل لديكم قائمة بسعر الساعة الأسبوعية .	عندكم قائمة بسعر الساعة الأسبوعية؟
أنا فاكر إني سبت الكاميرا بتاعتي ورايا وأنا بتعشى إمبارح.	أعتقد أنني تركت كاميرتي وغادرت عندما كنت أتناول العشاء هنا الليلة الماضية .	أعتقد إني نسيت كاميرتي هنا لما كنت باتعشى الليلة الماضية.
انا عايز ميه سخنه .	أرغب في بعض الماء الساخن حقاًً .	عايز شوية ميه سخنة بجد.
عندك من ده ميديام-لارج؟	هل يوجد لديكم هذا بمقاس متوسط الكبير ؟	عندكم المقاس ده متوسط كبير؟
طازة؟	هل هذا طازج ؟	ده طازة؟
في أي غرامة بسبب الالغاء؟	هل يتعين علي دفع أي مبلغ نظير الإلغاء ؟	لازم أدفع أي مبلغ عشان الإلغاء؟
ممكن أسألك على اسمك؟	هل يمكن أن أسأل عن اسمك ؟	ممكن أعرف اسمك؟
سمك مقلي.	سمك مقلي .	سمك مقلي.
ليه طيب؟	لماذا إذاً ؟	ليه طيب؟
لو سمحت. ممكن تقولي فين موقف التاكسي؟	معذرة . هل لك أن تدلني على مكان موقف سيارات الأجرة ؟	معذرة، ممكن تدلني على موقف التاكسي؟
ارفع ايديك .	ارفع يديك لأعلى .	ارفع إيديك لفوق.
تفتكر إننا نقدر نحطه على الرف اللي هناك ده؟	أتعتقد أنه من الممكن أن نضعها على الرف هناك ؟	تعتقد ممكن نحطها على الرف هناك؟
جرنان بالانجليزي، لو سمحت .	جريدة باللغة الإنجليزية ، لطفاً .	جريدة إنجليزي، لو سمحت.
لون العربية أصفر .	السيارة كانت صفراء اللون .	العربية كانت لونها أصفر.
حاسس كأني شارب بيرة في الجو الحر ده .	أودّ أن أشرب البيرة في مثل هذا الطقس الحار .	عايز أشرب بيرة في الجو الحار ده.
أه، اقعد من فضلك.	أجل ، تفضل بالجلوس .	أيوة، تفضل اقعد.
خليني أشوف تذكرتك. إنت حتأخد الرحلة الجاية ع الساعة واحدة.	دعني أري تذكرتك . عليك أن تأخذ رحلة الطيران التالية في الساعة الواحدة .	وريني تذكرتك. لازم تاخد الطيارة اللي جاية الساعة واحدة.
حفلة لأربعة، بليل الساعة سبعة و نص . تحب تتحجز بأى أسم؟	حفلة لأربعة ، الساعة السابعة والنصف الليلة . ما الاسم الذي تسميه لها ؟	حفلة لأربعة، الساعة سبعة ونص الليلة. الاسم إيه؟
حجز لملعب الجولف، من فضلك .	حجز لملعب الجولف , من فضلك .	حجز ملعب جولف، من فضلك.
أمتى ميعاد الاجتماع الجاي؟	متى موعد العرض القادم ؟	العرض الجاي إمتى؟
الرقم تسعة تسعة تسعة تسعة، تسعة تسعة تسعة تسعة، تسعة تسعة تسعة تسعة، تسعة تسعة تسعة تسعة.	الرقم هو تسعة تسعة تسعة تسعة ، تسعة تسعة تسعة تسعة , تسعة تسعة تسعة تسعة ، تسعة تسعة تسعة تسعة .	الرقم تسعة تسعة تسعة تسعة، تسعة تسعة تسعة تسعة، تسعة تسعة تسعة تسعة، تسعة تسعة تسعة تسعة.
انت عايز تشوف مين؟	من الذي تريد أن تراه ؟	عايز تقابل مين؟
لأ، انت ما تقدرش تبيعه غالي كده ؟	لا ، لا يمكنك أن تبيعها بهذا السعر العالي ؟	لا، مش ممكن تبيعها بالسعر العالي ده؟
قريبه من هنا؟	هل هي بالقرب من هنا ؟	هي قريبة من هنا؟
انا وصلت هنا عالجطوط الجوية البريطانية رحلة ميه اتنين و خمسين .	وصلت إلى هنا على متن رحلة طيران تابعة للخطوط الجوية البريطانية رقم واحد خمسة اثنان .	وصلت هنا على رحلة الخطوط الجوية البريطانية رقم 152.
عايز عدسة بتقرب.	أريد عدسات كاميرا تيليفوتوغرافية .	عايز عدسات تيليفوتوغرافية للكاميرا.
اوكى، أظن ان سعر الصرف بتقلب بين التوقعات العالية و القليله، انا بأتكلم بصفة عامة .	حسنا ، أعتقد أن سعر الصرف يتقلب بين توقعات بالارتفاع والانخفاض عموما .	طيب، أعتقد إن سعر الصرف بيتقلب بين التوقعات بالارتفاع والانخفاض.
حأخد شاي بحليب .	سوف أتناول بعض الشاي مع اللبن .	هاخد شاي بلبن.
نفضل تربيزة جنب الشباك.	نفضل مائدة بجوار النافذة .	نفضل ترابيزة جنب الشباك.
مساء الخير. عندي حجز. اسمي يامادا.	مساء الخير . لدي حجز . اسمي يامادا .	مساء الخير. عندي حجز. اسمي يامادا.
شكله إيه عليا؟	كيف يبدو ذلك علي ؟	ده شكله إزاي عليّ؟
هاعمل أشعة.	سوف أقوم بعمل أشعة سينية .	هعمل أشعة سينية.
اد ايه متعب؟	كم هى متعبة ؟	هي متعبة قد إيه؟
مبسوط إنى إتعرفت عليك، يا فندم.	أنا سعيد بمعرفتك , يا سيدي .	أنا مبسوط بمعرفتك، يا فندم.
ده مجانا.	إنه مجاني .	ده مجاني.
هانفضل طول الليل لحد تاني يوم.	سنمكث طوال الليل .	هنقعد طول الليل.
عايز بمبرز استعمال مره واحدة .	أريد بعض الحفاضات التى يمكن التخلص منها بعد الاستعمال .	عايز شوية حفاضات تستعمل وترمي.
عندك نبيت منغير سكر، مش غالي أوي؟	هل لديكم نبيذ غير حلو ثمنه غير مرتفع جداً ؟	عندكم نبيت مش حلو وسعره مش غالي أوي؟
هو كينج كونج عمره لعب بينج بونج ف هونج كونج؟	هل لعب كينج بنوج كرة البنج بنوج في هونج كونج ؟	كينج بنج لعب تنس الطاولة في هونج كونج؟
تذكرة واحده و لا اتنين ذهاب و عوده؟	ذهاب , أم ذهاب وعودة ؟	ذهاب بس ولا ذهاب وعودة؟
في أي هايبر ماركت قريب من هنا؟	هل يوجد أي محل متعدد الأقسام قريب من هنا ؟	في محل متعدد الأقسام قريب من هنا؟
أنا جيت على شركة طيران يونايتد رحلة رقم خمسة أربعة تلاتة.	لقد وصلت على خطوط يانايتد إيرلاينز رحلة رقم خمسة أربعة ثلاثة .	وصلت على رحلة يونايتد إيرلاينز رقم 543.
الشخص اللي عاوز أكلمه هو السيدة يوكو نيشيهارا.	الطرف الذي أريد استدعاءه هي السيدة يوكو نيشيهارا .	الشخص اللي عايز أكلمه هي السيدة يوكو نيشيهارا.
عنده واحد زى ده؟	هل عندك من نفس هذا النوع ؟	عندك من النوع ده؟
ممكن تشوفهولي؟	هل يمكنك أن تبحث لي عنها ؟	ممكن تدور لي عليها؟
أعتقد في أخطاء في الفاتورة.	أعتقد أن هناك أخطاءً في الفاتورة .	أعتقد إن في أخطاء في الفاتورة.
ده رائع. مش ممكن تكون الدهون قليلة. ده لأ.	إنها رائعة . لا يمكن أن تكون تافهة . على العكس .	هي رائعة. مستحيل تكون تافهة. بالعكس.
تحب بالطو صدره دابل ولا فرد؟	هل تفضل المعطف ذو الصف الواحد من الأزرار أم ذو الصفين ؟	تفضل المعطف بأزرار صف واحد ولا صفين؟
لا مؤاخذة، هو شارع ارموز قريب من هنا؟	عفوا ، هل شارع " هورموز " قريب من هنا ؟	معلش، شارع "هورموز" قريب من هنا؟
خلينا ناكل غدا بسيط .	هيا نأكل غداءً بسيطاً .	يلا ناكل غدا بسيط.
ايوه، ده كويس .	نعم ، هذا جيد .	أيوة، ده كويس.
كنت اتمنى اكون انت .	أتمنى لو كنت مكانك .	ياريتني كنت مكانك.
مش بأعرف أعوم . محتاج جاكيت انقاذ .	لا أستطيع السباحة . أحتاج إلى سترة الإنقاذ .	ما بعرفش أسبح. محتاج جاكيت إنقاذ.
انا حأمشي بكرة الصبح، حابب أدفع دلوقتي .	سأغادر باكراً غداً ، لذلك أود أن أدفع الآن .	هسيب بدري بكرة، فعايز أدفع دلوقتي.
اخرج، لو سمحت.	انطلق ، من فضلك .	اتحرك، لو سمحت.
طوارئ .	طوارئ .	طوارئ.
من فضلك راجعه بسرعة .	من فضلك تحقق منها بسرعة .	من فضلك اتأكد منها بسرعة.
منين الاقي ليموزين؟	أين لي أن أجد سيارة ليموزين ؟	ممكن ألاقي ليموزين فين؟
لأ شكرا . كده تمام .	لا شكراً ، هذا كله .	لا شكرًا، ده كله.
رقم الكرسي بتاعك مطبوع على التذكرة الاكسبريس.	رقم مقعدك مطبوع على تذكرة القطار السريع .	رقم مقعدك مطبوع على تذكرة القطار السريع.
إحنا بنفتح من تمنية ونص لحد حداشر.	يبدأ العمل لدينا من الثامنة و النصف إلى الحادية عشرة .	الشغل عندنا بيبدأ من 8 ونص لـ 11.
اى اوتوبيس يوديني نص البلد؟	أي حافلة تذهب إلى وسط المدينة ؟	أي أتوبيس بيروح وسط البلد؟
هاخد شوربة خضار و لحمة مشوية، من فضلك.	سآخذ حساء الخضار وشرائح الضأن المشوية ، من فضلك .	هاخد شوربة خضار وشرائح لحم الضأن المشوية، لو سمحت.
فيه مدرسة موجودة لتعليم الغطس؟	هل تتوافر أية مدرسة للغطس ؟	في مدرسة للغطس؟
كنت فاكر انه كامل . مفروض اعمل ايه؟	لقد ظننته كاملا . ماذا سأفعل ؟	كنت فاكره كامل. أعمل إيه دلوقتي؟
أخيرا لقيت شغلانه اقدر فيها استفيد من مواهبي .	وجدت أخيراً وظيفة يمكنني من خلالها أن أستغل مواهبي .	لقيت شغلانة أخيرًا أقدر أستغل فيها مواهبي.
عايز حاجة لأحساس الدوخة و القرف .	أريد دواء للغثيان .	عايز دواء للغثيان.
ممكن تقولي أكتر ديسكو معروف في المدينة هنا؟	أخبرني من فضلك ما هو أرخص " ديسكو " في هذه المدينة .	ممكن تقولي أرخص ديسكو في المدينة دي إيه؟
تذكرة مواصلة، لو سمحت.	تذكرة نزول وركوب طائرة أخرى من فضلك .	تذكرة نُزول وركوب تاني، لو سمحت.
ممكن آخد شوية فلفل اسود؟	هل لي في بعض الفلفل ؟	ممكن شوية فلفل؟
انت ماشي ورايا؟	أنت تتابع ؟	أنت متابع؟
الشهر اللي فاتت يوم تسعة .	في التاسع من الشهر الماضي .	في التاسع من الشهر اللي فات.
أنا ضيعت محفظتي جوة الهايبر ماركت ده.	لقد فقدت حافظة نقودي بداخل هذا المتجر ذو الأقسام المتعددة .	ضيعت محفظتي في المحل ده اللي فيه أقسام كتير.
تمام، انسة سوزوكي، عندك حجز عالرحلة ميتين و تلاتشر اللي حتطلع بكرة الساعة تلاتة الضهر . لو سمحت اعملي تشيك إن بكرة عالساعة اتنين .	حسنا ، آنسة سوزوكي ، لديك حجز على طائرة اثنين ثلاثة عشر التي تغادر غدا في الثالثة مساء . من فضلك سجلي اسمك في الساعة الثانية .	تمام، انسة سوزوكي، عندك حجز عالرحلة ميتين و تلاتشر اللي حتطلع بكرة الساعة تلاتة الضهر . لو سمحت اعملي تشيك إن بكرة عالساعة اتنين .
امتى تبدأ الرحلة؟	متى تبدأ الجولة ؟	الجولة بتبدأ إمتى؟
ده غالي جدا .	هذا مكلف نوعا ما .	ده غالي شوية.
امتى الفاصل؟	متى الاستراحة ؟	الاستراحة إمتى؟
امتى العشا؟	متى الغداء ؟	الغدا إمتى؟
ممكن تغيرلي ديه بواحده جديدة؟	هل يمكنك تبديل هذه بواحدة جديدة ؟	ممكن تبدلها بواحدة جديدة؟
مين بيلعب؟	من الذي يعزف ؟	مين اللي بيلعب؟
أنهي أحسن تفتكر كهدية لبنت عندها خمستاشر سنة؟	أي من هذه أفضل كهدية لفتاة في الخامسة عشر من عمرها ؟	أي واحدة من دول أحسن هدية لبنت عندها 15 سنة؟
هي دي هواية عندك تجمع الحيوانات المتخيطة؟	هل أحد هواياتك جمع الحيوانات المحنطة ؟	من هواياتك جمع الحيوانات المحنطة؟
في الشتا التلج بينزل عندنا في شمال اليابان و في المناطق الجبلية .	فى الشتاء لدينا تساقط للثلج في الجزء الشمالي لليابان و في المناطق الجبلية .	في الشتاء عندنا تساقط تلج في شمال اليابان وفي المناطق الجبلية.
انت عضو في النادي المنتشر بتاعنا اجر-عربية؟	هل أنت عضو دائم في نادي تأجير السيارات .	أنت عضو دائم في نادي تأجير العربيات؟
هم أقويا قوي؟	هل هم أقوياء جدا ؟	هما أقوياء جدًا؟
أها. هاخد حوالي خمس دقايق.	حسنا ، أمامي حوالي خمس دقائق .	طيب، قدامي حوالي خمس دقايق.
بس، هو، بني ادم، ازاى اتأكد ان كان ده حقيقي ؟	لكن ، هو , يا رجل كيف أعرف أنه الشيء الحقيقة ؟	بس، إزاي أعرف إنه الحاجة الحقيقية؟
عايز كتاب اطفال .	أريد كتاب للأطفال .	عايز كتاب للأطفال.
ممكن تكلمني لو لقيت شنطتي؟	هل يمكنك الاتصال بي إذا عثرت على حقائبي ؟	ممكن تتصل بيا لو لقيت شنطي؟
خصوصا لو انت ماشي قرب المباني، ممكن حد يتهجم عليك.	قد تتعرض لمحاولة اعتداء لا سيما إذا اقتربت من العمارات ؟	ممكن تتعرض لمحاولة اعتداء خصوصًا لو قربت من العمارات؟
داخلي ولا خارجي؟	هل هي في الداخل أم في الهواء الطلق ؟	هي جوه ولا في الهواء الطلق؟
مساء الخير . عايز أقدم طلب اخد تأشيرة دخول لبلدكم .	مساء الخير ، أريد أن أقدم طلبا للحصول على تأشيرة دخول بلادكم .	مساء الخير، عايز أقدم طلب للحصول على تأشيرة دخول لبلدكم.
انا فعلا اسف .	أنا أسف حقاً .	أنا آسف بجد.
هو ده الراجل.	ذاك هو الرجل .	ده الراجل.
لو سمحت حطه في كيس الورق البني .	من فضلك ضعها في هذا الكيس الورقي بني اللون .	من فضلك حطها في الكيس الورقي البني ده.
ممكن تدفع التكلفة الزيادة للخمسين في المية؟	هل يمكن أن تدفع ثمن التكلفة الزائدة وقيمتها خمسون بالمائة ؟	ممكن تدفع التكلفة الزايدة اللي قيمتها خمسين في المية؟
حأجي اشوفك يوم الجمعة الساعة عشرة .	سوف آتي لأراك في العاشرة يوم الجمعة .	هاجي أشوفك الساعة عشرة يوم الجمعة.
أووه، ده بعيد خالص، يا سيدي. التاكسي حيكون غالي. لكن إنت ممكن تروح أي حتة لو اتعلمت تستخدم المترو.	آه ، هذا بعيد نسبياً سيدي . سيارة الأجرة ستتكلف كثيراً . لكن بإمكانك الذهاب إلى أي مكان إذا تعلمت استخدام مترو الأنفاق .	آه، ده بعيد نسبيًا يا فندم. التاكسي هيكلف كتير. بس ممكن تروح في أي مكان لو اتعلمت تستخدم المترو.
احسنلك تاخد قطر تمانية و نص .	من الأفضل أن تستقل قطار الثامنة والنصف .	الأحسن تركب القطر الساعة تمانية ونص.
أيوه، حتقوله نوريكو ايتو اتصل؟	نعم ، هلا أبلغته أن نوريكو أيتوه قد اتصل ؟	أيوة، ممكن تقوله إن نوريكو أيتوه اتصلت؟
أنا عندي سخونية وحاسس جدا بدوخة.	أنني أعاني من حمة شديدة وأشعر أنني مصاب بدوار .	عندي حمى شديدة وحاسس بدوخة.
جالي ضربة شمس.	لقد أصبت بضربة شمس .	جالي ضربة شمس.
بتحسب غرامة الكنسلة إزاي؟	كيف يمكنك حساب رسوم الإلغاء ؟	إزاي بتحسبوا رسوم الإلغاء؟
سباجيتي بولونيز، من فضلك .	مكرونة إسباجيتي بولولنية ، من فضلك .	مكرونة إسباجيتي بولونيز، لو سمحت.
ممكن نأجر ملعب؟	هل نستطيع تأجير قاعة ؟	ممكن نأجر قاعة؟
ممكن استرد حاجتي؟	هل يمكن أن أستعيد متعلقات ؟	ممكن أسترجع متعلقاتي؟
أنا مش الشخص المسئول عن الجونتيات. لو سمحت شوفه.	أنا لست الشخص المسئول عن القفازات , من فضلك اعتني به .	أنا مش المسئول عن الجوانتيات، لو سمحت اهتم بيه.
من فضلك كوبايه ميه .	من فضلك أعطني كوباً من الماء .	من فضلك اديني كباية مية.
البطاقة اللي فيها اسمي عالشنطة .	بطاقة بإسمي على الحقيبة .	بطاقة باسمي على الشنطة.
عايز خيمة .	أريد خيمة .	عايز خيمة.
اكيد موجود، حضرتك . تحب تلقى نظرة عالكتيب ده؟	بالتأكيد موجودة ، يا سيدي . أتود أن تُلقي نظرة على هذه النشرة الإرشادية ؟	أكيد موجودة، يا فندم. تحب تبص على النشرة دي؟
لو تثدر تقلل السعر ده شويه، انا حاشتريه .	سأشتريها إذا خفضت السعر أكثر قليلاً .	هشتريها لو خفضت السعر شوية كمان.
طيب، أنا طالب سنة اولى في جامعة إي بي سي. انا باتخصص في التاريخ.	حسنا ، إنني طالب مستجد بجامعة (ايه . بي . سي) وأنا سأتخصص في التاريخ .	طيب، أنا طالب جديد في جامعة (ايه. بي. سي) وهاخصص في التاريخ.
ضاعت مني تذكرة الطيارة .	لقد أضعت تذكرة الطيران الخاصة بي .	ضيعت تذكرة الطيران بتاعتي.
بتبقى تسعه و تسعين دولار مع الضريبة بليل .	السعر تسعة تسعون دولار بالإضافة إلى الضريبة في الليلة .	السعر تسعة وتسعين دولار بالإضافة للضريبة في الليلة.
عورت دماغها.	لقد جرحت رأسها .	جرحت راسها.
دلوقتي هو عملها غلط.	الآن قد أخطأتها .	دلوقتي فاتتني.
اوتار الجيتار صدت .	الحبال بالية .	الحبال بالية.
عندك كل يوم جولة؟	هل عندك جولة كل يوم ؟	عندكم جولة كل يوم؟
فيه في الفندق ده تجهيزات للمؤتمرات؟	هل لدى هذا الفندق تجهيزات للمؤتمرات ؟	الفندق ده فيه تجهيزات للمؤتمرات؟
اوه، انا آسف، الباب التاني ع الشمال.	أرجو المعذرة . إنها الباب الثاني من جهة اليسار .	معلش. الباب التاني من ناحية الشمال.
عايز اخد حاجتي المهمه .	أرغب في استعادة نفائسي .	عايز أسترجع حاجتي الثمينة.
اهوه باسبوري .	هاك جواز سفري .	اتفضل جواز سفري.
كاتشب زيادة و كتر البهارات، لو سمحت .	المزيد من الكاتشب والمقبلات ، من فضلك .	شوية كاتشب ومقبلات زيادة، لو سمحت.
مع السلامة.	إلى اللقاء .	مع السلامة.
ممكن اخد ميعاد الجمعة؟	هل يمكنني تحديد موعد يوم الجمعة ؟	ممكن أحجز ميعاد يوم الجمعة؟
الفندق بتاعنا بيرتب عشان المربية.	يقوم فندقنا بالترتيبات لتوفير خادمة لرعاية الأطفال .	فندقنا بينظم توفير خادمة لرعاية الأطفال.
ممكن تيجي أي وقت تحبه بعد الضهر.	يسعك زيارتنا في أي وقت عصرا .	تقدر تزورنا في أي وقت بعد الظهر.
معك كارت بريد زيادة؟	لديك بطاقة بريدية إضافية ؟	عندك بطاقة بريدية زيادة؟
لسه ما اخدتش شنطي .	لم استلم أمتعتي بعد .	لسه ماستلمتش شنطي.
حداشر وربع بالليل.	الحادية عشر وأربعون دقيقة مساءً .	الساعة حداشر وأربعين دقيقة بالليل.
بيتحسن.	إنها تتحسن .	هي بتتحسن.
لو سمحت اتصل بالإسعاف.	من فضلك استدع سيارة إسعاف .	من فضلك اطلب إسعاف.
هو ده القطر اللي رايح علطول لشيكاغو؟	هل هذا قطار مباشر إلى شيكاغو ؟	ده قطار مباشر لشيكاغو؟
أنت بتهزر، صح؟	إنك تمزح ، أليس كذلك ؟	إنت بتهزر، مش كده؟
اهلا، معاك كارول براون بتكلمك، ممكن اكلم سوزان؟	أهلا كارول براون يتحدث . هل يمكنني أن أتحدث إلى سوزان ؟	أهلا، كارول براون بيتكلم. ممكن أكلم سوزان؟
عندنا حوالي تلاتين نوع من زيوت الحمام .	لدينا نحو ثلاثون نوعاً من زيوت الاستحمام .	عندنا حوالي تلاتين نوع من زيوت الاستحمام.
ممكن مكالمة تصحيني الساعة ستة الصبح.	من فضلك قم بالاتصال لإيقاظي غدا في الساعة السادسة صباحا .	لو سمحت صحيني بكرة الساعة ستة الصبح.
الاجهزة الكهربائية رخيصة جدا، لكن تمن الاكل و السكن عالي قوي .	الأجهزة الكهربائية رخيصة جداً , لكن مصاريف الأكل والسكن مرتفعة جداً .	الأجهزة الكهربائية رخيصة جدًا، بس مصاريف الأكل والسكن غالية جدًا.
تلقنصلية اليابانية فين؟	أين القنصلية اليابانية ؟	فين القنصلية اليابانية؟
معلقتين، لو سمحت.	ملعقتين , من فضلك .	معلقتين، لو سمحت.
طلبت اكله نباتي .	طلبت وجبة نباتية .	طلبت وجبة نباتية.
للأسف الكمام طويله قوي .	أخشى أن الأكمام أطول من اللازم .	خايف الأكمام تكون طويلة زيادة عن اللزوم.
خلينا نروح للموضوع اللي بعده .	فلننتقل إلى الموضوع التالي .	ننتقل للموضوع اللي بعده.
ايوه، أمبارح كانت الدنيا حر شويه أكتر .	نعم ، كان يوم أمس أدفأ قليلا .	أيوة، امبارح كان أدفى شوية.
الحاجة الساقعة دي ببلاش.	هذه المشروبات الغازية مجاناً .	المشروبات الغازية دي ببلاش.
الثلاجة مش بتشتغل.	إن الثلاجة معطلة .	التلاجة بايظة.
مسار الخير، فندق النجمة. أي خدمة؟	مساء الخير . فندق ستار . كيف يمكن أن أساعدك ؟	مساء الخير. فندق ستار. إزاي أقدر أساعدك؟
مفروض ادفع عربون؟	هل أدفع مبلغا مقدما ؟	أدفع مبلغ مقدم؟
بتنصح بكتاب مصور لطفل عنده ست سنين؟	هل بإمكانك أن تزكي لي كتاباً مصوراً لطفل يبلع من العمر 6 سنوات ؟	ممكن ترشحلي كتاب مصور لطفل عنده 6 سنين؟
نقدر نحصل على منتجات براندات مستورده .	نستطيع الحصول على أصناف متعددة من البضائع المستوردة من الماركات المعروفة .	نقدر نحصل على أصناف كتير من البضايع المستوردة من الماركات المعروفة.
أنا قاعد في الهيلتون.	أنا مقيم في فندق هيلتون .	أنا نازل في فندق هيلتون.
في الصيدلية.	في الصيدلية .	في الصيدلية.
لا مؤاخذة، ممكن تسلفني الاله الحاسبة.	لو سمحت ، أرجو إقراضي آلة حاسبة .	لو سمحت، عايز أستلف آلة حاسبة.
عندي حاجات للغسيل .	لدي بعض الملابس للمغسلة .	عندي شوية هدوم للغسيل.
فكلي الدولار ده لفكة، من فضلك .	فك لي هذه الدولار فكة صغيرة ، من فضلك .	ممكن تفكلي الدولار ده فكة، لو سمحت؟
ايه اكلة المطعم ده المخصوصة النهاردة؟	ما هي الوجبة الخاصة لهذا المطعم اليوم ؟	إيه الوجبة الخاصة في المطعم النهاردة؟
أتمنالك سنة سعيدة جدا.	أتمنى لك عاما سعيدا جدا .	أتمنى لك سنة سعيدة جدًا.
انا كنت بأفكر عن أول أسبوع في فبراير . و مازال على اني ابص عالحجوزات .	كنت أفكر في الأسبوع الأول من فبراير . مازلت يتعين علىّ ترتيب عملية الحجز .	كنت بفكر في أول أسبوع في فبراير. لسه محتاج أرتب عملية الحجز.
الرجاء ربط أحزمة الامان .	من فضلكم . اربطوا الأحزمة .	من فضلكم، اربطوا الأحزمة.
ده خمسمية اتنين وتلاتين.	إنها الخامسة واثنان وثلاثون .	الساعة دلوقتي خمسة واثنين وتلاتين دقيقة.
ممكن اشوف لسته النبيد، إذا سمحت؟	هل لي أن أرى قائمة النبيذ من فضلك ؟	ممكن أشوف قائمة النبيذ، لو سمحت؟
ادي الباقي بتاعك.	تفضل فكتك .	اتفضل الفكة بتاعتك.
للأسف مابنعملش كدة . بس انا متأكد انك حتستمتع بالعشا الخاص بتاعنا .	أخشى أننا لا نقدمه . لكن أنا متأكد أنك ستستمتع بغذائنا الخاص .	للأسف مش بنقدمه. بس متأكد إنك هتستمتع بأكلنا الخاص.
أنا وقعت من ع السلالم.	لقد سقطت من على درجات السلم .	وقعت من على السلم.
مصارعة السومة رياضة قومية في اليابان .	مصارعة السومو هي الرياضة القومية في اليابان .	مصارعة السومو هي الرياضة القومية في اليابان.
ممكن تحجزلي للمسرح؟	هل لك أن تحجز لي في أحد المسارح ؟	ممكن تحجزلي في مسرح؟
مطلوب منك تعرض النباتات والحيوانات ع الحجر الصحي لو عندك أي حاجة منهم.	عليك أن تفحص النباتات والحيوانات في الحجر الصحي إذا كان لديك أي منهم .	لازم تفحص النباتات والحيوانات في الحجر الصحي لو عندك أي حاجة منهم.
ناضجة؟	هل هي ناضجة ؟	هل هي مستوية؟
الكرنفال هو واحد من الحاجات الحضارية االمميزة في اليابان.	المهرجان واحدة من خصائص اليابان الثقافية .	المهرجانات جزء من الثقافة اليابانية.
انا حأحتاج حجز؟	هل أحتاج لحجز ؟	هل محتاج أحجز؟
عندكم ده بلون بيلمع؟	هل لديك هذه بلون زاهي ؟	عندك منها بلون فاتح؟
اتمنى نلاقي رحلة كيران كويسة .	أتمنى أن تكون رحلتنا سعيدة .	أتمنى تكون رحلتنا سعيدة.
و حنبدأ مع فرقة رولنج ستونز .	ابدأ التشغيل بفرقة رولينج ستونز .	شغل فرقة رولينج ستونز.
ايشيرو سوزوكي . س-و-ز-و-ك-ي .	ايشيرو سوزكي . ن و ز ك ي .	ايشيرو سوزوكي. ن و ز ك ي.
و ايه بخصوص العربية اللي هناك ديه، البليموث ؟	ماذا عن السيارة التي هناك ، بلايموث ؟	إيه رأيك في العربية اللي هناك، بلايموث؟
هدفي هو طوكيو .	إن جهتي هي طوكيو .	أنا رايح طوكيو.
ازيك، يا هاري . اشكرك انك عزمتنا .	مرحباً هاري . أشكرك على دعوتك لنا .	أهلاً هاري. شكرًا على دعوتك لنا.
انا متأكد ان كان معايا في الجيب الجواني بتاع البالطو بتاعي .	أنا متأكد أني وضعتها بالجيب الداخلي للمعطف .	متأكد إني حطيتها في جيب المعطف الداخلي.
من الشمال، الارقام ديه معناها وقت التصنيع الضروري، توقعات التكلفة، و المخاطرة الاقتصادية .	من اليسار ، هذه تشير إلى وقت التصنيع الضروري ، عرض التكلفة ، والمخاطرة المالية .	من الشمال، دي بتشير لوقت التصنيع، عرض التكلفة، والمخاطرة المالية.
لو مفيش هوا جامد، ممكن تيكي بوينت.	يمكننا الذهاب إلى نقطة تيكي إذا لم تكن الريح قوية .	ممكن نروح نقطة تيكي لو الريح مش قوية.
ممكن اروح هناك مشى؟	هل يمكنني الذهاب إلى هناك سيراً ؟	ممكن أروح هناك ماشي؟
من فضلك غيرلي ده .	من فضلك بدل هذا .	من فضلك بدل ده.
حوالي تلاتين دقيقة، من فضلك استنى في صالة الانتظار .	ثلاثون دقيقة تقريباُ . من فضلك انتظر في قاعة العبور .	حوالي تلاتين دقيقة. من فضلك استنى في قاعة الانتظار.
سامحنى . .ممكن من فضلك تقوللي فين محطة السكة الحديد؟	معذرة . هل يمكنك أن تخبرين عن الطريق إلى محطة السكة الحديدية , من فضلك ؟	لو سمحتي، ممكن تدليني على طريق محطة القطر؟
عايز خيط .	أريد بعض الخيط .	عايز شوية خيط.
الدور الكام؟	أي طابق ؟	أي دور؟
هو لازم أبلغه يتصل بيك تاني لما يرجع؟	هل أجعله يعاود الاتصال بك عندما يعود ؟	أقول له يتصل بيك لما يرجع؟
بيقرصوا .	أنهم يألمومنني .	بيوجعوني.
انا نسيت حاجة في الاوضة . ممكن ارجع و اتأكد؟	تركت شيئاً ما داخل الغرفة . هل بإمكاني أن أعود لأتحقق منه ؟	نسيت حاجة في الأوضة. ممكن أرجع أجيبها؟
عاوز كاميرا مش غالية.	أريد كاميرا رخيصة .	عايز كاميرا رخيصة.
واو. كل الناس بترقص زي المجانين.	يا للهول الكل يرقص بشكل جنوني .	يا خبر، الكل بيرقص بجنون.
تمام. لف على يمينك الزاوية الجاية. هتلاقيه قدامك علطول.	حسناً . انعطف إلى اليمين في الناصية القادمة . ستجده أمامك مباشرة .	طيب. لف يمين في الناصية الجاية. هتلاقيه قدامك على طول.
بخير، شكرا ليك. وأنت؟	بخير ، شكراً لك ، و أنت ؟	تمام، شكرًا، وأنت؟
اضغط بس.	ادفع فقط .	ادفع بس.
بكام؟	كم الثمن ؟	بكام؟
أيوة، أنا. أنا رايح لوس أنجيلوس.	أجل , إني ذاهب إلى لوس أنجلوس .	أيوة، رايح لوس أنجلوس.
من فضلك ماتدخنش في الوقت ده .	من فضلك لا تدخن في هذا الوقت .	من فضلك بلاش تدخن دلوقتي.
حيحتاج وقت قد إيه عشان يخف؟	كم سيأخذ من الوقت حتى يلتئم ؟	هياخد قد إيه عشان يلتئم؟
ده هديه. ممكن تلفهولي لفه هدايا من فضلك؟	أنها هدية . هل يمكنك أن تقوم بلف هذه الهدية لي .	دي هدية. ممكن تلفهالي؟
استنى. تلات تقاطعات، بعدين شمال؟	انتظر . ثلاث مربعات سكنية ثم اتجه يساراً ؟	استنى. تلات شوارع بعدين لف شمال؟
اسف، بس كل الترابيزات مليانه . تحب تستنى؟	آسف ، لكن كل موائدنا مشغولة . هل تود أن تنتظر ؟	آسف، بس كل الترابيزات محجوزة. تحب تستنى؟
بالبريد البحري؟	بالبريد البحري ؟	بالبريد البحري؟
امتى ميعاد الفطار؟	ما هو وقت الإفطار ؟	إمتى وقت الفطار؟
ديه رحلة طوكية سبعميه و تلاته اربعة سبتمبر، الجمعة .	إنها الرحلة رقم سبعة صفر ثلاثة المتجهة إلى طوكيو في الرابع من سبتمبر , الجمعة .	الرحلة رقم سبعة صفر تلاتة متجهة لطوكيو يوم ٤ سبتمبر، الجمعة.
مع إن بحب التمبورا، بس مش باكل سوشي كتير. معظم الناس مش متعودة تاكل سمك ني.	بالرغم من أنني أحب التمبورا , و لكنني لا آكل كثير من ال سوشي . غالبية الناس غير معتادين على أكل السمك النيئ .	مع إني بحب التمبورا، بس مش باكل سوشي كتير. معظم الناس مش متعودين على أكل السمك الني.
ممكن أعمل تشك إن هنا لرحلة طيران يونايتد؟	هل يمكن أن أدخل هنا لرحلة شركة الطيران المتحدة ؟	ممكن أدخل هنا لرحلة شركة الطيران المتحدة؟
مساء الخير. عندك حجز تربيزة أونلاين لشخصين؟	مساء الخير , هل لديك أي موائد مفتوحة لشخصين ؟	مساء الخير، عندك أي ترابيزات فاضية لشخصين؟
النور مش شغال .	الإضاءة لا تعمل .	النور مش شغال.
انا مش عارف، حضرتك . انت بتتكلم انجليزي؟ بتقول انجليزي؟ اتكلم .	لا أعلم ، سيدي . تتحدث الإنجليزية ؟ تتكلم الإنجليزية ؟ تكلم .	مش عارف، يا فندم. بتتكلم إنجليزي؟
ده ليه ضمان؟	هل لها ضمان ؟	ليها ضمان؟
هو المفروض أغسل الكاميرا فين؟	أين يجب على أن أنظف الكاميرا ؟	فين ممكن أنضف الكاميرا؟
انت متجوز ولا عازب؟	هل أنت متزوج أم عازب ؟	أنت متجوز ولا أعزب؟
كام تعريفة ركن العربية هنا في الساعة؟	كم أجر الانتظار في الساعة ؟	كام أجرة الانتظار في الساعة؟
ده خالي من الكحول، تقدر تسترخي شويه لأنك مش على بعضك.	إنه خال من الكحول , لذا تستطيع أن تستريح لأن هناك القليل من التهيج .	مفيهوش كحول، فتقدر تستريح لأنه مش هيسبب أي تهيج.
اشكرك . ده يسعدني .	شكراً . سيسعدني ذلك .	شكرًا، هيسعدني ده.
معدتي وجعاني .	أشعر بألم في معدتي .	حاسس بألم في بطني.
أنا موافق مع معظم اللي انت اقترحته.	أتفق مع معظم ما اقترحت .	موافق على معظم اللي اقترحته.
ممكن شويه ميه؟	هل يمكن أن آخذ بعضا من الماء ؟	ممكن أخد شوية ميه؟
لو سمحت قوللي إيه أرخص طريقة أروح بيها سان فرانسيسكو.	من فضلك دلني على أرخص وسيلة للذهاب إلى سان فرانسيسكو .	من فضلك قولي أرخص وسيلة أروح بيها سان فرانسيسكو.
ممكن ترشحلى قاموس فرنساوى-إنجليزى؟	هل لك أن تزكي معجم فرنسي إنجليزي ؟	ممكن ترشحلي قاموس فرنسي إنجليزي؟
مش لاقيه .	لا أستطيع أن أجدها .	مش لاقيها.
قف.	توقف .	وقف.
فيه خدمة توصيل لسياتل من شيكاجو؟	هل يوجد خدمة لسياتل من شيكاجو ؟	فيه خدمة لسياتل من شيكاجو؟
عندك شوربة بصل؟	هل عندكم أية شربة بصل ؟	عندكم شوربة بصل؟
لو سمحت اكتب التقرير عشان حأعمل مطالبة بالخساير لشركة التأمين .	من فضلك قم بإعداد التقرير حيث إنه يمكنني أن أقدم دعوى تعويض لشركة التأمين .	من فضلك جهز التقرير عشان أقدر أقدم دعوى تعويض لشركة التأمين.
رحلة رقم سبعة عندها تأخير ساعتين .	الرحلة الجوية رقم سبعة تأجلت ساعتين .	رحلة الطيران رقم سبعة اتأجلت ساعتين.
أنا عايز اسبرين.	أريد بعض الأسبرين .	عايز شوية أسبرين.
مبسوط اني أقابلك .	كم هو جميل أن ألقاك .	مبسوط جدًا إني شفتك.
استنى عند مكتب الاستعلامات، إذا سمحت .	انتظر أمام مكتب الاستعلامات من فضلك .	استنى قدام مكتب الاستعلامات، من فضلك.
ممكن أطلب كاس نبيذ؟	هل يمكن أن أطلب كأس نبيذ ؟	ممكن أطلب كاس نبيذ؟
فيه مجموعة من سبع فيتامينات ومعادن.	إن بها تشكيلة من سبعة فيتامينات ومعادن .	فيها تشكيلة من سبع فيتامينات ومعادن.
حاضر، يالا بينا . انا اقدر اساعدك في حل الواجب بتاعتك بعد ما ناكل بيتزا .	حسنا ، هيا نذهب . أستطيع مساعدتك في واجبك المنزلي بعد أن نتناول بعض البيتزا .	طيب، يلا نروح. أقدر أساعدك في الواجب بعد ما ناكل بيتزا.
شكرا. أنا رايح حفلة.	شكرا . أنا ذاهب إلى حفل .	شكرًا. أنا رايح حفلة.
أدي خمس دولارات بالظبط . خلي الباقي علشانك .	ها هي خمسة دولارات دون أي سنتات . احتفظ بالباقي .	دي خمسة دولار من غير سنتات. خلي الباقي.
اتنين هامبورجر واتنين قهوة، لو سمحت. عايزهم تيك اواي.	نريد اثنين هامبورجر واثنين قهوة ، من فضلك ، نريد تناولها خارج المحل .	عايزين اتنين هامبورجر واتنين قهوة، لو سمحت، هنتناولهم برة.
أتمنى لك وقت جميل.	أتمنى لك وقتاً سعيدا .	أتمنى لك وقت سعيد.
احود شمال الشارع ده و خد اول يمين .	اتجه يساراً في هذا الشارع ثم انعطف عند أول منعطف يمين .	لف شمال في الشارع ده وبعدين خد أول يمين.
عايزاه بنعل كويس و كعب عالي، من فضلك .	أبغيها بنعل وكعب من فضلك .	عايزها بنعل وكعب، لو سمحت.
بأعتذر . كله محجوز بكرة بليل .	آسف . الحجز كامل لمساء الغد .	آسف، الحجز كامل لبكرة.
تمام . عندك اى اعراض جانبية او حساسية.	حسنا .	طيب.
العلامة ديه بتقول ايه؟	إلى أي شيء تشير اللوحة ؟	العلامة ديه بتقول ايه؟
فين زيت السمسم؟	أين زيت السمسم ؟	فين زيت السمسم؟
فين كتب اللغات الأجنبية؟	أين كتب اللغة الأجنبية ؟	فين كتب اللغات الأجنبية؟
انا كين .	أنا كن .	أنا كن.
إيه ده، بجد؟ أنا عايش في كماكورا، ياريت تعدي علي بيتي.	آه ، حقاً ؟ أعيش في كاماكورا وأتمنى أن تأتي لترى منزلي .	آه، بجد؟ أنا ساكن في كاماكورا وبتمنى تيجي تشوف بيتي.
عايزه شامبو للشعر الجاف.	أريد شامبو جاف .	عايز شامبو جاف.
هو أنا حنزل إمتى؟	أين أنزل ؟	أنزل فين؟
فين الحمامات؟	أين غرف الراحة ؟	فين الحمامات؟
ايه أسرع وجبة؟	ما هي أسرع وجبة ؟	إيه أسرع وجبة؟
مش بالظبط . حاجه بس ماتكونش غاليه .	ليس تماماً . فقط شيء ما غير غالي الثمن .	مش بالظبط، حاجة تكون رخيصة.
أنا ممكن أعمله في يوم الشهر الجاي.	يمكنني القيام بها في وقتا ما الشهر القادم .	ممكن أعملها في وقت ما الشهر الجاي.
الاتوبيس ده رايح فندق هيلتون؟	هل هذه الحافلة تذهب إلى فندق هيلتون ؟	الباص ده بيروح فندق هيلتون؟
عاوز لمبة جديدة.	أحتاج إلى لمبة كهربائية جديدة .	محتاج لمبة كهربائية جديدة.
هو ينفع اشتري ربع رطل لحمة؟	أيسعني شراء ربع رطل من اللحم ؟	ممكن أشتري ربع رطل لحم؟
هو فيه تليفزيون؟	هل يوجد هناك تليفزيون ؟	فيه تلفزيون هنا؟
إنت كده حجزت.	الآن تم الحجز لك .	الحجز بتاعك اتعمل دلوقتي.
ممكن توريلي الخاتم ده؟	هل يمكن أن تريني هذا الخاتم ؟	ممكن توريني الخاتم ده؟
لو سمحت هات الفطار لأوضتي.	من فضلك أحضر الإفطار لغرفتي .	من فضلك هاتلي الفطار في الأوضة.
فين الكاتدرائية؟	أين الكاتدرائية ؟	فين الكاتدرائية؟
توستاية وفنجان قوة، لو سمحت.	خبز محمص وفنجان قهوة ، من فضلك .	توست وفنجان قهوة، لو سمحت.
ممكن أأجر شمسية.	أود استئجار شمسية .	عايز أستأجر شمسية.
فيه اى مكان للغطس قريب من هنا؟	هل يوجد أماكن للغوص بالقرب من هنا ؟	فيه أماكن للغطس قريبة من هنا؟
حأمشي بكرة.	سأغادر غداً .	هسافر بكرة.
إحنا ماشيين فين دلوقتي؟	ما هذا المكان الذي نمر به الآن ؟	إيه المكان ده اللي بنعدي من جنبه دلوقتي؟
رحلة سعيدة .	أتمني لك رحلة سعيدة .	أتمنى لك رحلة سعيدة.
لما أرجع لليابان، حكتب جواب. لو عندك وقت، من فضلك ابعتلي جواب.	عندما أعود ثانية إلى اليابان ، سأكتب خطاباً . وإذا كان لديك وقت ، من فضلك أرسل لي خطاباً .	لما أرجع اليابان، هكتبلك جواب. ولو عندك وقت، ابعتلي جواب.
بتحب أى نوع من الاكل؟	أي نوع من الطعام تفضل ؟	بتحب أي نوع أكل؟
الاكل استوى زيادة .	نضجت أكثر من اللازم نوعا ما .	استوت زيادة شوية.
تذكرتين درجة تانية لروما.	تذكرتان درجة ثانية إلى روما .	تذكرتين درجة تانية لروما.
متأسف ده كتير عليا.	أسف هذا كثير بالنسبة لي ؟	آسف، ده كتير بالنسبة لي.
ممكن اخد تذكرة مؤجلة؟	هل لي ببطاقة تعويضية عن إلغاء الحفلة أو المباراة بسبب الأمطار ؟	ممكن بطاقة تعويض لإلغاء الحفلة أو المباراة عشان المطر؟
ايه الحد الادني لعمر الناخبين في اليابان؟	ما هو الحد الأدنى لسن التصويت في اليابان ؟	إيه الحد الأدنى لسن التصويت في اليابان؟
أنا عاوز مرشد خاص ليوم كامل.	أود مرشد خاص ليوم كامل .	عايز مرشد خاص ليوم كامل.
لو سمحت ابعت الجواب ده بالبريد الجوي.	من فضلك ، أرسل هذا الخطاب بالبريد الجوي .	من فضلك، ابعت الجواب ده بالبريد الجوي.
عايز اد إيه؟	ما الكمية التي تريدها ؟	عايز قد إيه؟
لسه شويه، أشكرك .	ليس بعد ، شكراً .	لسه، شكرًا.
شيك سياحي وين ياباني، اوكي؟	هل يمكن استخدام شيكات سياحية وعملة ين ياباني ؟	ممكن أستخدم شيكات سياحية وعملة ين ياباني؟
لو انت ضربت الكورة ضربة سلايز ناحية اليمين، حتكون خارج يرة الفارواي .	إذا مررت هنا فستكون بعيداً عن الممر .	لو عديت من هنا هتكون بعيد عن الممر.
مفيش وقت كفاية للكتابة.	ليس ثمة ورق يكفي للكتابة .	مفيش ورق كفاية للكتابة.
اسمي توتسومو .	اسم تسوتومو .	الاسم تسوتومو.
بتقبلوا دولارات؟	هل تقبل الدولارات ؟	بتقبل دولارات؟
تحب صوص إيه؟	ما نوع التتبيلة الذي تريدها ؟	إنت عايز التتبيلة إيه؟
هو ده مقفول؟	هل هذا مغلق ؟	ده مقفول؟
انا حأراهن على حتى الارقام الحمرا .	سأراهن بها على الأرقام الزوجية الحمراء .	هراهن عليها على الأرقام الزوجية الحمراء.
ده غالي شويه، و لا انت رأيك ايه؟	هذا غال قليلاً ، ألا تعتقد ؟	ده غالي شوية، مش كده؟
واحشني يكون عندي حاجات مكتوبة بالياباني .	أنا أخطئ في أخذ الأشياء المكتوب عليها باليابانية .	بغلط لما باخد الحاجات المكتوب عليها بالياباني.
ممكن اواصل رحلتي؟	هل أستطيع مواصلة الرحلة ؟	ممكن أكمل الرحلة؟
إحنا ناخد المترو، بس الأول لازم نجيب التذاكر.	سنستقل قطار الأنفاق ، لكن علينا إحضار تذكارات أولاً .	هنركب المترو، بس لازم نجيب تذكارات الأول.
أنا عندى معاد تانى.	لدي موعد آخر .	عندي ميعاد تاني.
أنا كنت حابب يكون فيه شوية تغيير.	أود أن أحصل على بعض الفكة أيضاً .	عايز شوية فكة كمان.
بأفضل أوضه هادية .	أُفضلُ حجرة هادئة .	أفضل أوضة هادية.
اى نوع من البطاريات بتشتغل بيه؟	أي نوع من البطاريات تستخدم فيها ؟	بتستخدم فيها بطاريات إيه؟
لو سمحت اتأكد من عنوان السفارة اليابانية.	من فضلك ابحث عن عنوان السفارة اليابانية .	من فضلك دور على عنوان السفارة اليابانية.
حأبقى أقولك رقم تليفوني هناك أول مأ اقدر .	سأدعك تعرف رقم هاتفي هناك بأسرع ما يمكنني .	هقولك رقم تليفوني هناك أول ما أقدر.
إزاي أروح هناك؟	كيف أصل إلى هناك ؟	أوصل هناك إزاي؟
عندكم شويه نضاف؟	هل عندكم أي منها نظيف ؟	عندكم منها حاجة نضيفة؟
العفو. إحنا مبسوطين إنك كنت متفهم جدا.	مرحبا بك . يسعدنا أنك متفهم .	أهلا بيك، مبسوطين إنك متفهم.
التذكرة من نيويورك للوس انجلوس بكام؟	كم سعر تذكرة الطائرة من نيويورك على لوس أنجلوس ؟	كام سعر تذكرة الطيران من نيويورك للوس أنجلوس؟
حاسس إني دايخ شوية.	أشعر بدوار بسيط .	حاسس بدوخة بسيطة.
عندي صداع.	أشعر بصداع .	عندي صداع.
تعرف أي أماكن كويسة ينفع أقعد فيها في شيكاغو؟	هل تعرف أية أماكن حيدة للإقامة فيها في شيكاغو ؟	تعرف أماكن كويسة للإقامة في شيكاغو؟
حاديلك روشتة . خدها للصيدلية .	سوف أعطيك روشتة . خذها إلى الصيدلية .	هكتب لك روشتة، خدها الصيدلية.
إديني سجاير.	أعطني سجائر .	هاتلي سجائر.
أيوة . حابب أشتري سوية هدايا تذكارية . تنصحني بحاجه معينة؟	أجل . أريد شراء بعض التذكارات . هل لك أن ترشح لي شيئاُ نموذجياُ ؟	أيوة، عايز أشتري تذكارات. ممكن ترشحلي حاجة؟
فيه اوتوبيس للمدينة ديه بعد الماتش؟	هل يوجد هناك أية حافلة تتجه إلى المدينة عقب المباراة ؟	فيه أتوبيس بيروح المدينة بعد الماتش؟
دقايق قليلة كمان، من فضلك.	بضع دقائق أخرى من فضلك .	كام دقيقة كمان، من فضلك.
حأوصل متأخر تلاتين دقيقة، من فضلك اجل تسجيل استلامي الغرفة .	سأصل متأخراً ثلاثين دقيقة . من فضلك أرجئ تسجيل دخولي .	هتأخر نص ساعة. من فضلك أجل تسجيل دخولي.
اسمي اليزابيث .	اسمي إليزابيث .	اسمي إليزابيث.
ماعندناش شنطة تشيل كل ده علشان كده حأحطهم في شنطة بلاستيك كبيرة .	ليس لدينا حقيبة لمثل هذه الكمية ولذلك سأضعها في هذه الحقيبة البلاستيكية الكبيرة .	معندناش شنطة للكيمة دي، هنحطها في الشنطة البلاستيك الكبيرة دي.
ديه مسألة عرف . في اليابان، كان هناك عرف اخلاقي ان الولد مش مفروض يقعد مع بنت لما يكون عندهم سبع سنين .	إنها مسألة عادات . في اليابان , اعتادوا على نظام أخلاقي لا يسمح للولد مطلقا أن يجلس إلى فتاة بعد أن يبلغا السابعة من عمرهما .	دي مسألة عادات. في اليابان، الولد ما بيقعدش مع البنت بعد ما يتموا سبع سنين.
عاوز أجيب عربية جدبدة.	أتمنى أن أخذ سيارة جديدة ؟	نفسي أخد عربية جديدة؟
تمام . دلوقتي الساعة حداشر بليل، كده انا حأظبط ساعتي على عشرة الصبح، مظبوط؟	حسن . الآن الساعة إحدى عشر مساءً ، لذا رجعت ساعتي للوراء لعشرة صاحباً ، صح ؟	طيب، الساعة 11 بالليل، أرجع الساعة لورا لعشرة صح؟
من فضلك اقفل . حأرجع و اكلمك كمان شويه .	من فضلك اقفل الخط . سأتصل بك فيما بعد .	من فضلك اقفل الخط. هكلمك بعدين.
عايز تطلعولي بداله .	أريد إصدارها من جديد .	عايز أجددها.
ايوه، معايا علبتين .	نعم ، عندي كرتونتان .	أيوة، عندي كرتونتين.
أنهي مدخل؟	أي مدخل ؟	أنهي مدخل؟
ده لاستخدامي الشخصي.	إنها لاستخدامي الشخصي .	دي للاستخدام الشخصي.
مافيش مطعم كويس بيبص على منظر حلو قريب من هنا؟	هل ثمة مطعم جيد يطل على منظر لطيف بالقرب من هنا ؟	فيه مطعم كويس بطل على منظر حلو قريب من هنا؟
أعذرني . متهيألي انك قاعد على كرسيا . رقم كرسيك كام؟	عذرا ، أعتقد أنك تجلس في مقعدي . ما هو رقم مقعدك ؟	آسف، أعتقد إنك قاعد في مكاني. رقم مقعدك كام؟
إحنا حنوصل الساعة عشرة. ده قبل المعاد المتحدد بشوية.	سنصل في العاشرة . قبل الموعد بقليل .	هنوصل الساعة عشرة، قبل المعاد بشوية.
شنطة زرقا. اسمي وعنواني على الجزء اللي تحت. ممكن تساعدني عشان ألاقيها؟	حقيبة زرقاء . يوجد اسمي والعنوان في القاع . هل ساعدتني في أن أجدها ؟	شنطة زرقاء. اسمي وعنواني في القاع. ممكن تساعدني ألاقيها؟
اطلب الاسعاف بسرعة، من فضلك .	استدع سيارة إسعاف بسرعة ، من فضلك .	هات إسعاف بسرعة، لو سمحت.
أنا ضيعت محفظتي ف حتة في الهايبر ماركت.	لقد فقدت محفظتي في مكان ما من المتجر متعدد الأقسام .	ضيعت محفظتي في مكان ما في المتجر.
عندك طوابع؟	هل لديكم طوابع ؟	عندكم طوابع؟
السبت إجازة.	السبت والأحد عطلة .	السبت والأحد إجازة.
شفت بالطو اسود هنا؟	هل رأيت معطفاً أسود هنا ؟	شفت معطف أسود هنا؟
في حالة الحاجات المعفية من الجمارك، بتعدي النور الأخضر بتاع التفتيش.	في حالة السلع المعفاة من الرسوم ، أعبر عبر طاولة التفتيش ذات الضوء الأخضر .	في حالة السلع المعفاة من الجمارك، عدّي من طاولة التفتيش اللي بالنور الأخضر.
القطورات وقفت بسبب الإضراب.	توقفت القطارات بسبب الإضراب .	القطارات وقفت بسبب الإضراب.
عايز كبسوله كبس .	أريد كبسولة للثياب .	عايز كبسولة للهدوم.
انا طلعت القطر الغلط .	لقد ركبت القطار الخطأ .	ركبت القطر الغلط.
أقطعلي شويه كمان من الضهر .	أكثر قليلاً من الخلف .	شوية أكتر من ورا.
لو سمحت إملا الشهادة الطبية دي والروشيتة.	من فضلك املأ هذه الشهادة و الروشتة .	من فضلك املأ الشهادة والروشتة دي.
عامل المكالمات الخارجية، لو سمحت.	عامل المكالمات الدولية , من فضلك .	عامل المكالمات الدولية، لو سمحت.
دلوقتي روح الجمارك.	الآن اذهب إلى الجمارك .	دلوقتي روح الجمارك.
أنا اشتريت ده بس.	لقد فقط اشتريت هذا .	لسه شاري ده.
هى الخطوط الجوية حتدفعلي علشان اشتري حاجات شخصية اسايه؟	هل ستدفع لي شركة الطيران لشراء بعض الاحتياجات الشخصية الأساسية ؟	شركة الطيران هتدفع لي عشان أشتري احتياجاتي الشخصية الأساسية؟
التذكرة ديه لكرسي اوركسترا . انت قاعد في كرسي بلكون .	هذه التذكرة لمقعد في الصالة . لكنك تجلس في الشرفة .	التذكرة دي لمقعد في الصالة، بس إنت قاعد في الشرفة.
مش عايز آكل دلوقتي.	لا اريد أن أتناول الطعام الآن .	مش عايز آكل دلوقتي.
تمام، مفيش حاجة ممتعة الليلة دي.	حسنا , لا يوجد ما هو شيق الليلة .	طيب، مفيش حاجة شيقة الليلة.
بتبيعو عيش؟	هل تبيعون الخبز ؟	بتبيعوا عيش؟
من فضلك قل لي على مطعم له شعبية مع السكان المحليين.	من فضلك أخبرني ما هو المطعم الذي يفضله المحليون ؟	من فضلك، قول لي المطعم اللي المحليين بيفضلوه إيه؟
اد ايه وقت من هنا؟	كم المدة التي يستغرقها من هنا ؟	بياخد وقت قد إيه من هنا؟
اوه، لأ . كان لازم نتشيك للمسرح .	أوه ، لا . كان يجب علينا ارتداء ملابس سهرة للمسرح .	أوه، لا. كان لازم نلبس ملابس سهرة عشان المسرح.
اعملي تخفيض، من فضلك.	أريد تخفيضاً من فضلك .	عايز خصم، من فضلك.
عايز ابلغ عن قزازة النبيذ ديه .	أود أن أعلن عن هذه العبوة من النبيذ .	عايز أعلن عن عبوة النبيذ دي.
مش خطيرة؟	أليس هذا خطير ؟	مش ده خطر؟
شكرا. يبقي تمانين دولار و خمسين سنت بالضريبة. ادفع من فضلك عند الكاشير.	شكرا . الحساب هو ثمانين دولاراً وخمسون سنتاً مع الضريبة . من فضلك ادفع لموظف الخزينة .	شكرًا. الحساب 80 دولار وخمسين سنت بالضريبة. ادفع للكاشير، من فضلك.
فين الصودا؟	أين تُقدم أغاني البوب ؟	فين بيقدموا أغاني البوب؟
حاسس معدتي تعباني.	أشعر بمرضي في معدتي .	حاسس بوجع في معدتي.
عايز اركب الطيارة بسرعة .	أريد أن أسافر بالطائرة فى أقرب وقت ممكن .	عايز أسافر بالطيارة في أقرب وقت ممكن.
مضطر اودعك .	علي أن أقول وداعاً .	لازم أقول وداع.
هما في الدور التاني.	إنها في الطابق الثاني .	هي في الدور التاني.
عندك سمك مقلي؟	هل لديك سمك مقلي ؟	عندك سمك مقلي؟
ممكن واحد تاني؟	هل لي أن آخذ واحدة أخرى ؟	ممكن آخد واحدة تانية؟
ده حرامي.	إنه لص .	ده حرامي.
السعر عالايصال هو نفسة اللي عالاشعار .	السعر الموجود على الفاتورة هو نفس السعر الموجود ببطاقة التسعير .	السعر اللي على الفاتورة هو نفسه اللي على بطاقة التسعير.
حاجة تانية، لو سمحت.	لا أريد شيئاً آخر ، من فضلك .	مش عايز حاجة تانية، من فضلك.
المعرض بيفتح امتى؟	متى تفتح صالة العرض ؟	صالة العرض بتفتح امتى؟
إله ألوان تانية للتشفي دي؟	ما هي الألوان الأخرى المتاحة للسيارات الشيفرولية ؟	إيه الألوان التانية المتاحة لعربيات الشيفروليه؟
تمانتاشر دولار بالظبط .	ثمانية عشر دولارا بالضبط .	18 دولار بالضبط.
لا مؤاخذة . هو ده الطريق الصح للبناك الاهلي الاول؟	عذرا . هل هذا هو الطريق الصحيح إلى البنك الوطني الأول ؟	آسف، ده الطريق الصح للبنك الوطني الأول؟
انت كان المفروض تاخد الرحلة تمانية اتنين صفر، اللي اقلعت من خمستاشر دقيقة . على الى حال انا اقدر ارتب رحلة جديدة عشانك .	كان يفترض أن تسافر على الطائرة رقم ثمانية اثنان صفر التي أقلعت منذ خمس عشرة دقيقة . حسنا . بإمكاني تنظيم رحلة أخرى .	كان المفروض تسافر على رحلة 820 اللي أقلعت من 15 دقيقة. طيب، ممكن أرتب لك رحلة تانية.
الريسبشن بيفتح امتى؟	في أي وقت يفتح المكتب الأمامي ؟	المكتب الأمامي بيفتح امتى؟
فين تغيير العملة؟	أين شركة الصرافة ؟	فين شركة الصرافة؟
انت قلتلي ان الاجرة كانت عشر دولارات عند المطار .	لقد قلت لي أن التعريفة دولاران في المطار .	انت قلتلي إن التسعيرة 2 دولار في المطار.
عايز تحول أد ايه لفلوس؟	كم تريد أن تصرف ؟	عايز تصرف كام؟
لا، أعتقد أنهم نسيوا يجبولنا واحد.	لا , أعتقد أنهم نسوا أن يحضروا واحدة لنا .	لا، أعتقد إنهم نسوا يجيبوا واحدة لنا.
ممكن تسلمهم بكرة الصبح؟	هل يمكنك أن توصلهم غداً صباحاً ؟	ممكن توصلهم بكرة الصبح؟
حبو منع الحمل وحبوب المعدة مختلفين، صح؟	حبوب عسر الهضم تختلف عن حبوب ألم المعدة ، أليس كذلك ؟	حبوب عسر الهضم غير حبوب ألم المعدة، مش كده؟
ممكن تطلعولي كارد بديل؟	هلا أصدرت لي بطاقة بديلة ؟	ممكن تطلعلي بطاقة بديلة؟
عاوز أحل، لو سمحت.	أريد قص الشعر ، من فضلك .	عايز أقص شعري، من فضلك.
من الصبح و انا عندي الاعراض ديه .	عندي هذه الأعراض منذ الصباح .	الأعراض دي عندي من الصبح.
بأفضل كرسي قدام .	أفضل مقعداً في الأمام .	أفضل أقعد قدام.
عشرة نوفمبر .	العاشر من نوفمبر .	10 نوفمبر.
ماعيش روشته .	ليس لدي تذكرة طبية .	معنديش تذكرة طبية.
مفروض اخد رسالة؟	هل يمكن أن آخذ رسالة ؟	ممكن آخد رسالة؟
الشنطة ديه معمولة من الفينيل، زى ما انت واخد بالك حتلاقيها جامده جدا و شكلها اخر موضه .	ولأن هذه الحقيبة مصنوعة من مادة الخمر فكما تلاحظ هي قوية جدة وعلى أحدث موضة .	الشنطة دي معمولة من خامة جلد، زي ما إنت شايف قوية جدًا وعلى أحدث موضة.
عايز ابعت فلوس بحوالة، لو تكرمت .	حوّل ، من فضلك .	حول، من فضلك.
في البداية، لازم اقول اننا مش متخصص في الموضوع ده . و لا انا بأمثل أى منظمة حكومية . اللي انا عايز اقولكم عليه كله بيعبر رؤيتي الشخصية . مع امكانياتي للتعبير عن وجهة نظري .	يجب أن أقول في البداية أنني لست خبيراً في هذا الموضوع ، أو أنني أمثل أية منظمة حكومية . إن ما سأقوله لكم هو رأي الشخصي بالكامل . إنني أرحب بالتعبير عن رأي بعد وضع هذا التحفظ .	لازم أقول من الأول إني مش خبير في الموضوع ده، ولا بمثل أي منظمة حكومية. كل اللي هقوله هو رأيي الشخصي. وأرحب بأي رأي تاني بعد ما تقولوا ده.
الساعة سته و نص .	إنها ستة وثلاثين .	دي 36.
لو اشتريت ده كمان، هاتكمل قيمة الإعفا من الجمارك.	إذا اشتريت هذا أيضا , فستعمل للمبلغ الذي يعفي من الرسوم .	لو اشتريت ده كمان، هيبقى السعر اللي يعفي من الرسوم.
من فضلك فكلي ديه بعملات صغيرة .	من فضلك حول هذا لعملات معدنية صغيرة .	من فضلك، حول ده لفكة صغيرة.
إيه اللي حصل؟ ما قدرتش أشوف.	ماذا حدث ؟ لا أستطيع أن أرى .	إيه اللي حصل؟ مش شايف حاجة.
موظف التليفون، لو سمحت.	اعطني عامل التليفون من فضلك .	هاتلي عامل التليفون، من فضلك.
في الرسم ده الشريط المظلل بيوري مبيعات شركتنا السنه الاخيرة .	العمود المظلل يظهر أرقام مبيعات شركتنا العام الماضي .	العمود المظلل بيظهر أرقام مبيعات شركتنا السنة اللي فاتت.
شرايط الكارب بتترفع وبيتعرض عرض عرايس السامرائي في اليوم ده.	أعلام على شكل أسماك مرفوعة و دمى ساموراى معروضة حولنا هذا اليوم .	فيه أعلام على شكل سمك مرفوعة ودمى ساموراي معروضة حوالينا النهارده.
كتب و كتيبات .	الكتب والكتيبات .	الكتب والكتيبات.
تلوث الهوا مشكلة خطيرة في المدينة .	تلوث الهواء مشكلة خطيرة في هذه المدينة .	تلوث الهواء مشكلة خطيرة في المدينة دي.
ممكن تخللي عندك الشنط للساعة أربعة؟	هل لك أن تحفظ هذه الأمتعة حتى الرابعة ؟	ممكن تحتفظ بالأمتعة دي لحد الساعة 4؟
أحيانا بتجرح.	تؤلمني بعض الوقت .	بتوجعني أحيانًا.
ممكن تكرر ده، من فضلك؟	هل يمكن أن تكرر ذلك , من فضلك ؟	ممكن تعيد تاني، من فضلك؟
حد اقتحم اوضتي امبارح بليل .	اقتحمت غرفتي الليلة الماضية .	حد دخل غرفتي امبارح بالليل.
أنا عايز أدرس طب.	أريد دراسة الطب .	عايز أدرس طب.
لازم تكون هناك في معاد أخره ستة ونص.	يتعين عليك الوصول هناك قبل السادسة .	لازم توصل هناك قبل الساعة 6.
ممكن تتكلم بشويش شوبه؟	هلا تحدثت بشكل أبطأ ، من فضلك ؟	ممكن تتكلم أبطأ، من فضلك؟
كام ميل لحد بوسطن؟	كم ميلاً إلى بوسطن ؟	كام ميل لبوسطن؟
فين مفروض أقابل؟	أين نلتقي ؟	هنتقابل فين؟
عندي صداع بشع. تعرف أي دكتور كويس قريب من هنا؟	عندي صداع شديد ، هل لديكم أطباء جيدون بالقرب من هنا ؟	عندي صداع شديد، فيه دكاترة كويسين قريب من هنا؟
عندي حساسيه ضد الاسبرين.	لدى حسّاسية من الأسبيرين .	عندي حساسية من الأسبيرين.
عايز احجز كرسي النهاردة .	أريد مقعداً اليوم .	عايز مقعد النهارده.
ايه رأيك في ده؟ ده بس بميه دولار . يستاهل كل قرش فيه .	وماذا عن هذا ؟ إن السعر مائة دولار فقط . إنه يساوي كل سنت منها .	وإيه رأيك في ده؟ سعره 100 دولار بس، ويستاهل كل سنت.
تقريبا حوالي تلتميت جنية، من فضلك .	حوالي ثلاث مائة جنية ، من فضلك .	حوالي 300 جنيه، من فضلك.
أنا حاولت بجد، بس مقدرتش أحقق حلمي.	لقد حاولت ، لكن لم أستطع تحقيق حلمي .	حاولت، بس مقدرتش أحقق حلمي.
بتقفل الساعة كام؟	ما مواعيد انتهاء العمل ؟	مواعيد انتهاء الشغل امتى؟
ممكن احجز اجر-عربية هنا؟	هل يمكن أن أحجز سيارة للإيجار من هنا ؟	ممكن أحجز عربية للإيجار من هنا؟
طبعا، اقدر اقول كده . انا مش فاهم اى حاجه من اللي الناس حوالينا بيقولوها .	نعم ، أنا أستطيع الإخبار . أنا لا أستطيع فهم أيّ شيء مما يقوله الناس حولنا .	أيوة، أقدر أقول. مش بفهم أي حاجة من اللي الناس بتقولها حوالينا.
أنا مع عيلتي، عشان كدة مش حقدر أديلك رقم أوضتي.	إني مع أسرتي . ولذا لا يسعني أن أعطيك رقم غرفتي .	أنا مع أسرتي، عشان كده مقدرش أديك رقم أوضتي.
لأ، مش كده. المفروض تنزل الموقف الجاي.	لا ، لن تفعل . يجب أن تنزل في المحطة القادمة .	لأ، لازم تنزل في المحطة الجاية.
آه، ممكن كوكا، لو سمحت؟	أجل ، اعطني كوكاكولا من فضلك .	أيوة، اديني كوكاكولا من فضلك.
فين أقرب محل بيع ادوات رياضيه؟	أين يقع أقرب متجر للأدوات الرياضية ؟	فين أقرب محل للأدوات الرياضية؟
ايديك لفوق . أخرس و اديني الفلوس اللي معاك .	ارفع يدك . اصمت واعطني نقودك .	ارفع إيدك، اسكت وهات فلوسك.
ممكن تصورنى؟	هل لك أن تلتقط صورة لي ؟	ممكن تاخدلي صورة؟
باقترح تزور كمان مبنى الولايات المتحدة على النهر الشرقي.	أقترح أن تزور أيضاً مبنى الأمم المتحدة على ضفاف النهر الشرقي .	أنصحك تزور كمان مبنى الأمم المتحدة على ضفاف النهر الشرقي.
بأخد دروس بيانو مره فالاسبوع .	آخذ دروس تعليم البيانو مرة في الأسبوع .	بأخد دروس بيانو مرة في الأسبوع.
من فضلك قل لي إجراء الإعفا من الضرايب.	من فضلك أخبرني إجراء الإعفاء الضريبي .	من فضلك قول لي إزاي أعمل الإعفاء الضريبي.
ده كان ممتاز.	كانت رائعة .	ده كان ممتاز.
هل ده جلد؟	أهي مصنوعة من الجلد ؟	دي معمولة من الجلد؟
عندي واحد صغير من نفس التصميم.	لدي واحدة صغيرة من نفس التصميم .	عندي واحدة صغيرة من نفس التصميم.
ممكن ناخد وجبة؟	هل يمكن أن نأخذ وجبة ؟	ممكن ناخد وجبة؟
ممكن أدفع بالين؟	هل يمكنني الدفع بالين ؟	ينفع أدفع بالين؟
انا متأسف . السكينه وقعت مني . ممكن تجيبلي واحدة تانية ؟	معذرة . سقطتْ مني السكين . أيمكنك أن تأتيني بأخرى ؟	آسف، السكينة وقعت مني. ممكن تجيب لي واحدة تانية؟
إيه اللي بيتم إنتاجه محليا؟	ما هو الشيء الذي أنتج محلياً ؟	إيه الحاجة اللي اتعملت محلياً؟
اى وقفة للوتوبيس أقرب لمركز لينكون؟	ما هي أقرب محطة لمركز لنكولن ؟	فين أقرب محطة لمركز لنكولن؟
لو لقيت أي حاجة، من فضلك اتصل بيا.	إن عثرت على شيء ، اتصل بي من فضلك .	لو لقيت حاجة، كلميني من فضلك.
مافيش ولا محل من المحلات دي في اليابان، أعمل إيه؟	لا يوجد أي من هذه المتاجر في اليابان . لذا , ماذا عساي أن أفعل ؟	مفيش المحلات دي في اليابان. أعمل إيه؟
أشتريت البنطلون ده امبارح، بس مش جاي على مقاسي .	لقد اشتريت هذا السروال بالأمس , لكنه لا يناسبنى .	اشتريت البنطلون ده امبارح، لكنه مش مناسب.
فين مكتب السياحة؟	أين مكتب السياحة ؟	فين مكتب السياحة؟
محفظة فيها ميه دولار و بطاقتين إئتمان .	محفظة بها مائة دولار وبطاقتان ائتمانيتان .	محفظة فيها مية دولار وبطاقتين ائتمان.
فين بأقدم الطلب؟	أين يمكن أن أقوم بالطلب ؟	أطلب منين؟
شاورلي عليه عالخريطة، من فضلك .	أشر على مكانها على الخريطة من فضلك .	أشر لي عليها على الخريطة من فضلك.
ممكن نوصل هناك في عشر دقايق؟	هل يمكن أن نصلك هناك خلال عشر دقائق ؟	ممكن نوصل هناك في عشر دقايق؟
الكرسي ده ف أنهي جزء؟	في أي قسم يقع هذا المقعد ؟	في أي قسم الكرسي ده؟
و ادي السوسيس يا مان .	ها قد أتى رجل السجق الساخن .	أهو جاي راجل الهوت دوج.
انا اسف جدا، حأغيره، انت عايز اى واحد؟	إنني أسف للغاية . سأبدلها . أي واحدة كنت تريد ؟	أنا آسف جدا. هبدلها. أنهي واحدة كنت عايز؟
لو سمحت بطل تريقة على الشعب الياباني.	من فضلك توقف عن السخرية من الشعب الياباني .	من فضلك بطل تتريق على الشعب الياباني.
طبعا . الطريق ده، من فضلك .	متأكدة . هذا الطريق ، من فضلك .	أكيد. الطريق ده، من فضلك.
عايز دوا لعسر الهضم .	أود بعض الأدوية لعسر الهضم .	عايز دواء لعسر الهضم.
هو الفندق بعيد عن هنا اد ايه؟	كم المسافة من هنا إلي الفندق ؟	المسافة قد إيه من هنا للفندق؟
اتأسس سنه الف و سبعميه و تلاته و خمسين لكن الواجهه بالاعمده الرخام اتبنوا الف و تمنميه اتنين و خمسين .	أسس في عام ألف وسبعمائة وثلاثة وخمسين بيد أن الواجهة ذات الأعمدة الرخامية قد تم بنائها في عام ألف وثمانمائة واثنين وخمسين .	تأسس في 1753، لكن الواجهة الرخامية اتبنت في 1852.
كويس، ديه اوضه هادية . كويس جدا .	حسنا , هذه غرفة هادئة . جميلة جدا .	طيب، الأوضة دي هادية. جميلة جدا.
ممكن شويه ميه؟	أيمكن أن أحصل على بعض الماء ؟	ممكن أشرب ميه؟
انت تقصد انك مش عايز تفاصل معاهم؟	هل تعني أنك لا تريد التوصل إلى حل وسط معهم ؟	تقصد إنك مش عايز تتوصل لحل وسط معاهم؟
شوية بس.	قليلاً فقط .	شوية بس.
انا محظوظ اني عرفتك .	إنني محظوظ لمعرفتك .	أنا محظوظ إني عرفتك.
في ناس بتروح محطة قطر طوكيو والفنادق الكبيرة.	البعض يذهب إلى محطة طوكيو المركزية والفنادق الكبيرة .	بعض الناس بيروحوا محطة طوكيو المركزية والفنادق الكبيرة.
المحل ده حيفتح بكرة؟	هل سيكون هذا المتجر مفتوحاً غداً ؟	المحل ده هيبقى مفتوح بكرة؟
هدوم، شنط، جزم، حاجات زى كده .	ملابس وحقائب وأحذية وأشياء من هذا القبيل .	هدوم وشنط وجزم وحاجات زي كده.
عايز احطه في صندوق ايداع امن .	أود أن أضع ذلك في صندوق ودائع آمن .	عايز أحط ده في صندوق ودائع آمن.
ممكن تطتبلي محضر سرقة؟	هلا حررت لي شهادة بالسرقة ؟	ممكن تكتب لي شهادة بالسرقة؟
بألوان مختلفة؟	بألوان مختلفة ؟	بألوان مختلفة؟
كلفتني كام المكالمة بتاعتي؟	كم تبلغ تكلفة مكالماتي الهاتفية ؟	مكالماتي الهاتفية تكلفتها قد إيه؟
ناوي أقضي اليوم بكرة في شرا الحاجات .	أنوي أن أقضي الغد في التسوق .	ناوي أقضي بكرة في التسوق.
ماشي، أه، عايز نص-مسلوق، قصدي، بيضة مسلوقة بس مش أوي، من فضلك.	حسناً أريد بيضة نصف مسلوقة , أعني بيضة لم يكتمل سلقها , من فضلك .	طيب، عايز بيضة نص مسلوقة، يعني مش مستوية تمام، من فضلك.
ليه ما نقدرش نقعد في الفندق اللي إحنا حاجزينه؟	لماذا لا نستطيع أن نقيم في الفندق الذي حجزنا فيه ؟	ليه مش قادرين نقيم في الفندق اللي حجزناه؟
إزاي أروح هناك بالمترو؟	كيف يسعني الذهاب إلى هناك بالمترو ؟	إزاي أروح هناك بالمترو؟
فلفل، لو سمحت .	فلفل ، من فضلك .	فلفل، من فضلك.
الملاية مش نضيفة .	الملاءات متسخة .	الملايات متسخة.
اتفضل، يا استاذ .	استمر يا سيدي .	كمل يا باشا.
هو ممكن تعمل خصم لوقعدت لمدة ليلتين؟	هل يمكنك عمل خصم في حالة الإقامة ليلتين ؟	ممكن تعمل خصم لو قعدت ليلتين؟
انا حاسس اني احسن .	أشعر بتحسن كبير .	حاسس بتحسن كبير.
عندكم مضارب تنس للايجار؟	هل لديك مضارب تنس للإيجار ؟	عندك مضارب تنس للإيجار؟
يمكن كدة.	ربما كذلك .	ممكن.
الساعة القديمة دي بطلت تمشي. ممكن تبدلها؟	لقد توقفت ساعة الحائط القديمة . هل لك أن تبدلها ؟	الساعة القديمة وقفت. ممكن تبدلها؟
تمام، غرفة ميتين وتلاتة. ده مفتاحك.	وهو كذلك ، الغرفة اثنان صفر ثلاثة . ها هو ذا المفتاح .	ماشي، الأوضة 203. اتفضل المفتاح.
ازاي اركب الفلاش ده؟	كيف أهيئ هذا الفلاش ؟	إزاي أضبط الفلاش ده؟
تمام . ايه اسم الشخص التاني و تليفونه، إذا سمحت .	حسنا . ما هو اسم شريكك ورقمه ، من فضلك .	طيب، إيه اسم شريكك ورقمه، من فضلك.
أنا مرتبك. عندك مانع ترسم لي خريطة؟	سأرتبك . هل تمانع في رسم خريطة لي ؟	هتلخبط. ممكن ترسم لي خريطة؟
ده حيكون كويس. فين العيش؟	هذا رائع . أين الخبز ؟	ده رائع. فين العيش؟
السيدة في الفستان الاحمر ، ده اسم شمبانيا اساسها كوكتيل الفراولة و منعشة جدا.	السيدة ذات الرداء الأحمر عبارة عن شمبانيا مكونة أساساً من كوكتيل فراولة وهو منعش جداً .	السيدة ذات الرداء الأحمر دي شمبانيا معمولة من كوكتيل فراولة، ومنعشة جدا.
موقف التاكسي، فين؟	موقف سيارات أجرة ، أين ؟	فين موقف التاكسيات؟
معايا رخصة السواقة تنفع؟	لدي بطاقتي الشخصية . رخصة القيادة تفي بالغرض ؟	عندي بطاقتي الشخصية. رخصة القيادة تنفع؟
تمن أول تلات دقايق بعشرة سنت.	سعر الثلاث دقائق الأولي عشرة سنتات .	سعر الثلاث دقايق الأولانية 10 سنت.
احنا على ارتفاع اتناشر ألف قدم.	إننا على ارتفاع اثني عشر ألف قدم .	إحنا على ارتفاع 12000 قدم.
بأذاكر انجليزي .	أدرس الإنجليزية .	بدرس إنجليزي.
ممكن تورينى الكرسى بتاعى، لو سمحت؟	هل لك أن تدلني على مقعدي , من فضلك ؟	ممكن تدلني على مقعدي، من فضلك؟
رحلتنا تبدأ واحد وعشرين يوليو وتنتهي سبعة وعشرين.	تبدأ رحلتنا في الأول و العشرون من يوليو و تنتهي في السابع و العشرين .	رحلتنا بتبدأ في 21 يوليو وبتنتهي في 27.
عايز اوضه نوعها ايه؟	ما نوع الغرفة التي تريدها ؟	إيه نوع الأوضة اللي عايزها؟
فاتورتي بكام؟	كم فاتورة الحساب ؟	فاتورة الحساب كام؟
بصراحة أقولك اني مش موافق على ده .	بصراحة ، لا أتفق مع ذلك .	بصراحة، مش متفق مع ده.
إنت عايش هنا؟	هل تسكن هنا ؟	إنت ساكن هنا؟
فاضل أد إيه لحد مانبدأ؟	كم من الوقت الزائد قبل أن نبدأ ؟	باقي قد إيه على ما نبدأ؟
متهيألي قابلنك قبل كده . انا كينيشي يامادا من شركة نانيو تيكنولوجي .	أظن أنني قابلتك من قبل . أنا كينيتشي يامادا من شركة نانيو للتكنولوجيا .	أعتقد إني قابلتك قبل كده. أنا كينيتشي يامادا من شركة نانيو للتكنولوجيا.
ده ليك.	إنها لك .	دي ليك.
هايلاقوها بكرة.	سوف يجدونها غدا .	هيلقوها بكرة.
في الساعة دي، يا أفندم؟ دي حداشر بالليل.	في هذه الساعة ، يا سيدي ؟ إنها الحادية عشرة صباحاً .	في الوقت ده، يا بيه؟ دلوقتي الساعة 11 الصبح.
معايا دبوس طرحة معدن عاج.	لدى دبوس معدني .	عندي دبوس معدني.
عايز بالطو طويل.	أريد معطف طويل .	عايز بالطو طويل.
حاخد مقعد الأوركسترا.	سآخذ مقعداً في القاعة الرئيسية .	هاخد كرسي في القاعة الرئيسية.
عايز احجز كرسيين لنيويورك تلاته اغسطس .	أود حجز مقعدين لنيويورك في الثالث من أغسطس .	عايز أحجز مقعدين لنيويورك في 3 أغسطس.
عاوز شوية كماشات.	أريد كماشة .	عايز كماشة.
كم تكلفة الليله؟	كم يبلغ سعر الليلة ؟	الليلة بكام؟
بياخد وقت اد ايه علشان اطلب حاجه؟	كم ستستغرق لكي تطلب ؟	هتاخد وقت قد إيه في الطلب؟
ممكن أقعد فين وقت الرحلة؟	أين يمكنني أن أقيم أثناء الجولة ؟	فين ممكن أقيم أثناء الجولة؟
ده كتير أوي.	إنه كثير جداً .	ده كتير أوي.
من فضلك بدللي العدسات ديه . ممكن تكون جاهزة دلوقتي و انا مستنيها؟	من فضلك غير العدسات . هل يمكنك أن تجهزها أثناء انتظاري ؟	من فضلك، غير العدسات. ممكن تجهزها وأنا مستني؟
أنهو نوع من شنط السفر؟	أي نوع من حقائب السفر ؟	إيه نوع شنط السفر؟
اليابان عمرها أد إيه؟	ما عمر اليابان ؟	اليابان بقالها قد إيه؟
اكتر حاجه اتباعت عندنا في اخر اربع سنسن هي مكنه التصوير ايه اكس ربعميه و خمسين .	أكثر منتجاتنا بيعت عبر السنوات الأربع الماضية هي الآلة الناسخة طراز أ . أكس أربعة خمسة صفر .	أكتر منتجاتنا مبيعاً خلال الأربع سنين اللي فاتت هي الآلة الناسخة طراز AX450.
ممكن نسخه جديده منهم؟	هل يمكنني الحصول على إصدار جديد منها ؟	ممكن أخد نسخة جديدة منها؟
أنا بادور على استاذ جونز. أنا عندي شوية حاجات مهمة نتكلم فيها.	إني أبحث عن السيد جونز . سأحدثه في أمر شديد الأهمية .	بدور على السيد جونز. عايز أكلمه في موضوع مهم جداً.
عندك مانع لو طفيت الراديو؟	هل تمانع لو أطفأت الراديو ؟	تمانع لو طفيت الراديو؟
في صحتك .	لصحتك .	لصحتك.
شارع اتنين و اربعين.	شارع اثنين وأربعين .	شارع 42.
اوة، انا أسف . انا حأستعجل طلبك حالا .	آه , إنى آسف . سوف أحضر طلبك بأقصى سرعة ممكنة .	آه، أنا آسف. هجيب طلبك بأسرع وقت ممكن.
من فضلك إديني كرسي جمب الشباك في الآخر.	من فضلك اعطني مقعد بجوار النافذة في الخلف .	من فضلك، اديني كرسي جنب الشباك في الخلف.
مخدة وبطانية، من فضلك.	أريد وسادة وبطانية من فضلك .	عايز مخدة وبطانية، من فضلك.
ازيك، مجلة قصص مصورة ماليزية . حأشتري واحدة اخدها البيت نتناقش فيها .	هاي ، كتاب كوميدي ماليزي . سأشتري واحداً لآخذه إلى المنزل كقطعة محادثة .	هاي، كتاب كوميدي ماليزي. هشتري واحد أخده البيت كقطعة حوار.
عايز سي دي .	أريد اسطوانة مدمجة .	عايز سي دي.
رجليها من تحت وارمة.	كاحله متورم .	كاحله وارم.
ممكن تقولي اوتوبيس كام بيروح سانتا مونيكا؟	هل يمكنك أن تخبرني برقم الحافلة المتجهة إلى سانتا مونيكا ؟	ممكن تقول لي رقم الأتوبيس اللي رايح سانتا مونيكا؟
خليني اشوف قيمة استبدال الدولار بالين النهاردة . دقيقة واحده، من فضلك .	دعني أتحقق من سعر صرف الدولار أمام الين اليوم . لحظة واحدة ، من فضلك .	خليني أشوف سعر الدولار مقابل الين النهارده. ثانية واحدة، من فضلك.
اوه، الطيارة ديه أصغر من انها تشيل كل الشنط .	آه . هذه الطائرة صغيرة جداً لدرجة أنها لن تسع كل الأمتعة .	آه. الطيارة دي صغيرة أوي، مش هتسع كل الشنط.
عاوز أعمل حجز.	أود أن أقوم بالحجز .	عايز أحجز.
عايز عشا .	أريد طعام العشاء .	عايز عشا.
من فضلك قل لي إزاي أتصل بالرقم ده.	من فضلك أخبرني كيف أطلب هذا الرقم .	من فضلك، قولي إزاي أطلب الرقم ده.
من فضلك اكتبلي .	من فضلك سجل اسمي .	من فضلك، سجل اسمي.
همم. مش ناافع، مش كده؟ ممكن تتحرك لكرسي فاضي، لو حبيت.	هه . إنها لا تعمل ، أليس كذلك ؟ يمكنك الانتقال إلى مقعد شاغر إذا كنت تريد ذلك .	هه. مش شغالة، صح؟ ممكن تنتقل لكرسي فاضي لو عايز.
اوكي، انا مش عارف .	حسناً ، أنا لا أعلم .	طيب، مش عارف.
بس عشان هديه تذكارية . انت عارف، ماعندناش النوع ده من التاكسيات في اليابان .	لمجرد التذكار . أتعلم أن ليس لدينا هذا النوع من التاكسي في اليابان .	لمجرد التذكار. عارف إن معندناش النوع ده من التاكسي في اليابان.
ممكن أجرب؟	هل يمكنني أن أحاول ؟	ممكن أجرب؟
عايز حاجه عشان الصداع الجامد .	أريد شيئاً لآلام الرأس .	عايز حاجة للصداع.
عايزة كريم مسائي .	أرغب في كريم مسائي للبشرة .	عايز كريم ليلي للبشرة.
وقعت معلقتي.	لقد سقطت ملعقتي .	المعلقة وقعت مني.
خليني اشوف جزم بني .	دعني أشاهد بعض الأحذية بنية اللون .	خليني أشوف شوية جزم بنية.
صناعة السيارات هي مفاح اليابان للصناعة.	تصنيع السيارات هو الصناعة الرئيسية في اليابان .	صناعة السيارات هي الصناعة الرئيسية في اليابان.
ممكن ارجعة لو ما طلعش عالمقاس؟	هل تسمح لي بإعادته إذا لم يناسب مقاسي ؟	ممكن أرجعه لو مش على مقاسي؟
كام موقف أتوبيسات ينفع أرجع منه؟	كم عدد محطات الحافلة التي ينبغي أن أرجعها ؟	كم محطة أتوبيس لازم أرجع؟
ممكن تكتب ده، من فضلك؟	هلاّ دونت ذلك ، من فضلك ؟	ممكن تكتب ده، من فضلك؟
فيه دكتور في الفندق او دكتور ينفع نوصله؟	هل هناك طبيب للفندق أو واحد على صلة بالفندق .	فيه دكتور في الفندق أو ليه علاقة بالفندق؟
محتاج شنطة اسعافات اوليه .	ابغي صندوق إسعافات أولية .	عايز صندوق إسعافات أولية.
كل حاجه تاخد وقت اد ايه؟	إجمالاً كم من الوقت تستغرق ؟	إجمالاً بتاخد وقت قد إيه؟
خلينا نشتري حاجاتنا بسرعه .	هيا نتسوق بسرعة .	يلا نتسوق بسرعة.
اه، يا فندم. هحول مكالمتك حالا. لو سمحت خليك معايا.	أجل , سيدي . سأحول مكالمتك حالاً . انتظر من فضلك .	أيوة، يا بيه. هحول مكالمتك حالاً. انتظر، من فضلك.
شنط واحد تاني اتسلمت بالخطأ لأوضتي .	تم نقل أمتعة شخص آخر لغرفتي .	شنط حد تاني اتنقلت لأوضتي.
من فضلك اعمل مكالمة على حساب المتلقي .	من فضلك اعمل مكالمة تتحصل على ثمنها من المطلوب .	من فضلك، اعمل مكالمة تتحصل على تمنها من المطلوب.
سدادة البانيو مكسورة .	إن محبس حوض الاستحمام مكسور .	محبس البانيو مكسور.
لو سمحت غير الفلوس دى بدولارات.	من فضلك حول هذه النقود إلى دولارات .	من فضلك، حول الفلوس دي لدولارات.
أيوة، بس ما يكونش جامد جدا .	نعم ، لكن ليس قويا جدا .	أيوة، بس مش قوي أوي.
عندكم واحد ازرق غامق؟	هل لديك واحدة لونها أزرق داكن ؟	عندك واحدة لونها أزرق غامق؟
ادي اسمي و عنواني بالكامل .	إليك اسمي كاملاً وعنواني .	اتفضل اسمي وعنواني بالكامل.
قول له من فضلك إن شيمادا اتصل و إني هاجيله يوم الجمعة ده.	من فضلك أبلغه أن شيمادا قد اتصل وإنني سوف أزوره يوم الجمعة .	من فضلك، قله إن شيمادا كلم وهايزوره يوم الجمعة.
ممكن تاخدني للأوتيل؟	هل بالإمكان أن توصلني إلى الفندق ؟	ممكن توصلني للفندق؟
حاجة غلط في الفيلم. إنت حتفحصه؟	هناك عيب ما في الفيلم . هل يمكنك أن تفحصها ؟	فيه عيب في الفيلم. ممكن تفحصه؟
ده قطر سريع؟	هل هذا قطار سريع ؟	ده قطار سريع؟
من فضلك أكتب أسمك، الفندق اللي انت فيه، رقم تليفونك في الورقة ديه .	من فضلك دون اسمك والفندق الذي تقيم فيه ورقم هاتفك على هذه الورقة .	من فضلك، اكتب اسمك والفندق اللي نازل فيه ورقم تليفونك على الورقة دي.
إيه اللون اللي ف دماغك؟	ما هو اللون الذي تفكر فيه ؟	إيه اللون اللي بتفكر فيه؟
خلينا نشوف.	لنرى .	خلينا نشوف.
مين الست ديه؟	من تكون هذه السيدة ؟	مين الست دي؟
دلوقتي عارف ان الموضوع كان غلط .	الآن أعرف . ماذا كان الخطأ . ؟	دلوقتي عرفت. إيه كان الغلط؟
منين أقدر اشبط في أوتوبيس يروح بوسطن؟	أين يمكن أن أخذ حافلة للذهاب إلى بوسطن ؟	فين أركب أتوبيس لبوسطن؟
الحاجات دي شكلها طعمها حلو.	يبدو أن هذا الطعام لذيذ .	الأكل ده شكله حلو.
أيوه، بس انت المفروض تحط "بالبريد الجوي" هنا لو انت عايز تبعته بالبريد الجوي.	نعم ، ولكن لابد من إضافة " بالبريد الجوي " في هذا المكان إن أردت إرسالها بالبريد الجوي .	أيوة، بس لازم تضيف "بالبريد الجوي" هنا لو عايز تبعتها بالبريد الجوي.
ممكن تدينى فوطة بلاج؟	هل يمكنك أن تعيرني فوطة الشاطئ ؟	ممكن تديني فوطة للشاطئ؟
رايح لندن .	وجهتي لندن .	وجهتي لندن.
اهاه . اضطريت ابعد عن شغلي شويه .	عظيم . يجب علىّ أن أخرج من عملي لبعض الوقت .	عظيم. لازم أخرج من شغلي شوية.
ده الدوا المهضم اللي باستخدمه على طول.	هذا الدواء مساعد على الهضم عادة ما أستعمله .	الدوا ده بيساعد على الهضم ودايماً باستخدمه.
مية و عشرين دولار في الليلة، غير شاملة الضريبة.	مائة وعشرون دولارً لليلة الواحدة ، ما عدا الضريبة .	120 دولار في الليلة، من غير الضرايب.
من فضلك وريني انا فين عالخريطة ديه .	من فضلك أرني أين أنا على هذه الخريطة .	من فضلك، وريني أنا فين على الخريطة دي.
رد فعل التاجر مع المنتج كان كويس .	كان رد فعل المتعاملين تجاه المنتج جيداً .	رد فعل الناس على المنتج كان كويس.
أسف، طلبت الرقم غلط .	آسف , لقد اتصلت بالرقم الخطأ .	آسف، كلمت الرقم الغلط.
بالبريد الجوي ولا بالبريد البحري او البري؟	بالبريد الجوي أم بالبريد العادي ؟	بالبريد الجوي ولا العادي؟
فيه سوق قريب من هنا؟	هل يوجد سوق بالقرب من هنا ؟	فيه سوق قريب من هنا؟
ممكن طفاية سجاير، من فضلك؟	هل نستطيع الحصول على مطفأة سجائر من فضلك ؟	ممكن منفضة سجائر، من فضلك؟
لأ، مش كتير. شنطتين بس.	لا ، ليس كثيراً . حقيبتين فقط .	لأ، مش كتير. شنطتين بس.
هي دي جولة يوم كامل؟	هل هي جولة يوم كامل ؟	دي جولة ليوم كامل؟
بأخطط اني استنى خمس تيام .	أنوي الإقامة لمدة خمسة أيام .	ناوي أقعد 5 أيام.
دوشة جامدة حوالين أوضتي.	إن حول غرفتي ضجيجا بالغا .	فيه دوشة كتير حوالي أوضتي.
بقالنا اد ايه علبال ما نوصل لسيدني ؟	كم من الوقت حتى نصل إلى سيدني ؟	هنوصّل سيدني إمتى؟
أيوه . شوجي تياراياما . و خليني أقرب ما يمكن لخشبة المسرح، لو تكرمت .	نعم ، " تيراياما " ، وأود مقعدي أن يكون قريباً قدر الإمكان من خشبة المسرح ، من فضلك .	أيوة، "تيراياما"، وعايز مقعدي يكون قريب من المسرح، لو سمحت.
عندك أي حاجة تكون ف حدود تمانين دولار بالظبط؟	هل لديك أي شيء يبلغ سعره ثمانون دولارا فقط ؟	عندك حاجة ب80 دولار بس؟
ده شكله ايه في رأيك؟	كيف يبدو ذلك بالنسبة لك ؟	إيه رأيك في كده؟
هو التليفون ده خارج الخدمة؟	هل بهذا الهاتف عطل ؟	التليفون ده فيه عطل؟
متابع؟	هل تم اتباعها ؟	اتبعوا التعليمات؟
امتى اخر وقت للتسجيل للرحلة ديه في المطار؟	ما هو أخر موعد للوصول إلى مكتب المراجعة لهذه الرحلة في المطار ؟	إيه آخر ميعاد للوصول لمكتب المراجعة للرحلة دي في المطار؟
بكام ده للرطل؟	كم سعر الرطل من هذا ؟	الكيلو ده بكام؟
البرج ده كبير قد إيه؟	ما حجم هذا البرج ؟	البرج ده حجمه إيه؟
ممكن تغيرلي ده ل دولارات.	من فضلك حول هذا إلى دولارات أمريكية .	من فضلك، حول دي لدولارات أمريكية.
للأسف هو متأخر حوالي تلات دقايق.	أخشى أنها متأخرة ثلاث دقائق .	أعتقد إنها متأخرة 3 دقايق.
المصرف الدولي.	صرافة دولية .	صرافة دولية.
ايوه، بادور على بالطو .	نعم ، أنني أبحث عن معطف .	أيوة، بدور على بالطو.
ممكن تساعدني الاقي مرسد سياحي بيتكلم ياباني.	من فضلك ساعدني أعثر على مرشد يتحدث اليابانية .	من فضلك، ساعدني ألاقي مرشد بيتكلم ياباني.
فجأة جالي مغص في معدتي .	أصبت بمغص فجأة .	جالي مغص فجأة.
قالولي ان ليا فاكس عندك.	أخبرت أن لديكم فاكسا لي .	قالوا لي إن عندكم فاكس لي.
عندك نفس الحاجة بلون تاني؟	هل عندكم نفس الشيء بلون مختلف ؟	عندكم نفس الحاجة بلون مختلف؟
الصبح ده فيه سقعة .	الجو بارد هذا الصباح .	الجو بارد الصبح ده.
الغسيل ما نشفش كويس.	الغسيل لم يجف تماما .	الغسيل لسه ما نشفش تمام.
بكام كل حاجة؟	كم تبلغ التكلفة المجملة ؟	التكلفة الكلية قد إيه؟
هي الجولة دي بتشمل زيارة لبرج سيرز؟	هل تشمل هذه الرحلة زيارة لبرج سيرز ؟	الرحلة دي فيها زيارة لبرج سيرز؟
انه اوتوبيس مفروض أخده للمحطة؟	أية حافلة يجب أن آخذ إلى المحطة ؟	أركب أي أتوبيس للمحطة؟
عايز قاموس انجليزي - ياباني .	أرغب في قاموس إنجليزي ـ ياباني .	عايز قاموس إنجليزي-ياباني.
ساعتك مظبوطة؟	هل ساعتك مضبوطة ؟	ساعتك مظبوطة؟
ممكن اسأل عن وقت المغادرة من هنا؟	هل لي أن أسأل عن وقت المغادرة من هنا ؟	ممكن أسأل عن وقت المغادرة من هنا؟
انزل المنحدر ده . حتوصل لطريق تلات اتجاهات . خد الشمال .	اصعد إلى المنحدر . سيصادفك طريق من ثلاثة مفارق . ثم اتجه إلى اليسار .	طلع المنحدر، هيجيلك طريق فيه 3 مفارق، بعدين خد شمال.
أسف، مش قادر افهمك . ممكن تتكلم بشويش شوية، من فضلك؟	آسف ، لا يمكنني متابعتك . هل من الممكن أن تتحدث ببطء أكثر من فضلك .	آسف، مش قادر أتابعك. ممكن تتكلم ببطء أكتر، من فضلك؟
عايز كروت تذكارية لهاواي .	ابحث عن كروت لمناظر تعكس طبيعة جزر هاواي .	دور على كروت فيها مناظر طبيعية من جزر هاواي.
ايه نوع اللحمة دي؟	أي نوع من اللحوم هذا ؟	النوع ده من اللحمة إيه؟
ده مكان صعب الوصول له. ده ف شاره صفير متفرع من شارع رئيسي.	يصعب العثور على هذا المكان . إنه في طريق ضيق يتفرع من الطريق الرئيسي .	صعب تلاقي المكان ده. هو في شارع ضيق متفرع من الطريق الرئيسي.
ممكن المسه؟	هل يمكن أن ألمسها ؟	ممكن ألمسها؟
ايه الهدف من رحلتك؟	ما الغرض من رحلتك ؟	إيه هدف رحلتك؟
خايف انه ما يكونش فيه ملعب جولف قريب .	أخشى أن لا يكون هنا أية دورة لتعليم الجولف .	للأسف، مفيش هنا دورة لتعليم الجولف.
ده شكله كويس. بكام ده؟	هذا يبدو رائعاً . ما الثمن ؟	ده شكله حلو أوي. بكام؟
ماعنديش نسخة من تذكرة الطيارة .	ليس لدي نسخة من تذكرة طائرتي .	معنديش نسخة من تذكرة الطيارة بتاعتي.
ممكن توصل شنطي للأوضة؟	هل يمكنك أن توصل أمتعتي إلى الغرفة ؟	ممكن توصل الشنط للأوضة؟
عايز أروح الحمام .	أريد الذهاب إلى الحمام .	عايز أروح الحمام.
من فضلك اديني تخمين .	من فضلك اعطني سعر تقديري .	من فضلك، اديني سعر تقريبي.
ده الطريق الصح للمحطة الرئيسيه؟	هل هذا هو الطريق الصحيح إلى المحطة المركزية ؟	ده الطريق الصحيح للمحطة المركزية؟
خلينا نحط الحشو جواه .	إذن دعنا نبطنها من الداخل .	طيب، نبطّنها من جوه.
اشكرك، بس احب افكر تاني .	شكراً ، لكنني أريد أن أمعن التفكير فيها .	شكراً، بس عايز أفكر فيها أكتر.
أربعة وعشرين، عشرة واحدة والباقي دولارات.	ورقات فئة العشرين وواحدة فئة العشرة ، والباقي أوراق نقدية فئة الدولار .	ورق فئة العشرين وواحدة فئة العشرة، والباقي دولارات.
ده الاتوبيس الصح اللي بيروح شيلسي؟	هل هذه هي المحطة للأتوبيس المتجهة إلى شيلسي ؟	دي محطة الأتوبيس اللي رايح شيلسي؟
رقم كرسيا دي اتناشر. هو فين؟	رقم مقعدي دي اثنا عشر . أين هو ؟	رقم مقعدي D12. فين هو؟
من فضلك اعمل حجز لترابيزة لأربع أشخاص الساعة سبعة. اسمي سكاتا.	من فضلك احجز مائدة لأربعة أفراد الساعة السابعة . اسمي ساكاتا .	من فضلك احجز ترابيزة لأربعة الساعة سبعة. اسمي ساكاتا.
بياخد حوالي نص يوم. المرشد هايكون هنا عشان ياخدك على حوالي الساعة تسعة الصبح.	تستغرق حوالي نصف يوم . سيكون مرشد الجولة هنا ليأتي ويأخذنا حوالي الساعة التاسعة صباحاً .	هتاخد حوالي نص يوم. المرشد هييجي ياخدنا حوالي الساعة 9 الصبح.
ممكن من فضلك تلبس كرافتة؟	من فضلكم , هل لكم أن ترتدوا رابطات العنق ؟	من فضلكم، ممكن تلبسوا كرافتات؟
يكلفني كلم تأجير لوح السباحه ده لنص يوم؟	كم ثمن إيجار نصف يوم للوحة ؟	كام إيجار نص يوم للوحة؟
اعذرني. هو طريق أمانات الشنط أنهو؟	عفواً . أية طريق يؤدي إلى الحقائب التي تخلفت ؟	عفواً، أي طريق للشنط اللي اتأخرت؟
إيه أحسن طريقة للبس ده؟	ما هي أفضل طريقة لارتداء هذه ؟	إيه أحسن طريقة تلبس بيها دي؟
خلينا نفترض اني سقت المرسيدس عشرتلاف ميل كمان و حاولت ابعيهالك تاني . حتديني كام دولار؟	دعنا نفترض أن أقود سيارة مرسيدس مسافة تزيد على عشرة آلاف ميل ثم أبيعها لك . كم دولارا سآخذ ؟	نفترض إني سقت عربية مرسيدس أكتر من 10000 ميل وبعتها لك. هاخد كام دولار؟
آه، بس إتأكد إن تذكرتك معاك.	نعم ، ولكن تأكد أن تذكرتك معك .	أيوة، بس تأكد إن تذكرتك معاك.
عايز اسألك عن النقطة رقم تلاته . مش انا على حق في التفكير اني مفروض ادفع بحوالة بنك؟	أود أن أسألك عن النقطة رقم ثلاثة . هل أنا محق في الاعتقاد بأنه يتعين علىّ أن أسدد بحوالة بنكية ؟	عايز أسألك عن النقطة رقم 3. هل صح إني لازم أدفع بحوالة بنكية؟
الظاهر إن المكنة بايظة.	يبدو أن الآلة لا تعمل .	يبدو إن الآلة مش شغالة.
عايز فلاش كاميرا، من فضلك .	أريد إضاءة متواترة .	عايز إضاءة متقطعة.
من هنا، من فضلك، الكرسي اللي جنب الشباك بتاعك .	هذا الاتجاه ، من فضلك . المقعد الذي بجوار النافذة خاص بك .	من هنا، من فضلك. الكرسي اللي جنب الشباك بتاعك.
ممكن أأجر سرج و خوذة؟	هل يمكن أن أستأجر سرجاً وخوذة ؟	ممكن أأجر سرج وخوذة؟
ممكن تاخدنى كانتربري وترجعنى؟	هل لك أن تأخذني إلى كانتربري وتعيدني إلى هنا ؟	ممكن توصلني لكنترابري وترجعني هنا تاني؟
تحب ترابيزتك تكون في صالة المطعم الرئيسية و لا في أوضه خاصة، حضرتك؟	هل تود منضدة في المطعم الرئيسي أو في غرفة خاصة يا سيدي ؟	تحب ترابيزة في المطعم الرئيسي ولا في غرفة خاصة يا فندم؟
هو فيه أي ماتشات لنيويورك يانكيز الأسبوع ده؟	هل هناك أي ألعاب يانكيز نيويورك هذا الأسبوع ؟	في أي ماتشات لليانكيز نيويورك الأسبوع ده؟
طلبي لسه ما جاش .	طلبي لم يأت .	طلبي ماجاش.
ايه نوع الجلد اللي اتعملت منه المحفظة ديه؟	من أي نوع من الجلد صنعت حافظة النقود هذه ؟	المحفظة دي معمولة من جلد إيه؟
كله تمام.	كل شيء جميل .	كل حاجة جميلة.
لأ، حكلمه تاني.	كلا . سأتصل به مرة أخرى .	لا، هكلمه تاني.
الساعة تلاتة.	الساعة الثالثة .	الساعة 3.
عاوز بكرتين فيلم أبيض وأسود، لو سمحت.	أريد بكرتين أفلام أبيض وأسود , من فضلك .	عايز بكرتين أفلام أبيض وأسود، من فضلك.
دي محفظتي.	هذه محفظتي .	دي محفظتي.
احنا متأكدين . اهي متكومة هناك، شايف؟ بيع السير الذاتيه زى بيع الكيك السخن .	بالتأكيد لدينا . إنه موضوع في صف هناك ، هل تراه ؟ إن المذكرات تباع بكثرة .	أكيد عندنا. محطوط في الرف هناك، شايفه؟ المذكرات بتتباع كتير.
علشان امشي . ممكن تحطلي شوكة في الكيس؟	هيا نرحل . هلا وضعت شوكة طعام في الحقيبة ؟	يلا نمشي. ممكن تحط شوكة في الشنطة؟
ده ممكن لو قدرت اخد رحلة الطيران الصباحية يوم سته و عشرين .	هذا ممكن إذا أمكنك السفر على رحلة صباح باكر يوم السادس والعشرين .	ده ممكن لو تقدر تسافر على رحلة بدري يوم 26.
انا سمعت كلمة "رينجي شو" مستخدمة كتير في اليابان . معنى الكلمة ديه ايه؟	أسمع أن كلمة " رينجيشو " تستخدم كثيراً في اليابان . ماذا تعني ؟	سمعت إن كلمة "رينجيشو" بتستخدم كتير في اليابان. بتعني إيه؟
خلينا نعمل كمادات باردة علشان نخفف الالم .	لنستخدم كيس بارد لتخفيف الألم .	نستخدم كيس تلج عشان نخفف الألم.
انت فعلا ساعدت .	لقد ساعدت حقيقةً .	ساعدت فعلاً.
ممكن تديني طبق جديد من دول؟	هلا أعطيتني أحد هذه الأطباق الجديدة .	ممكن تديني واحد من الأطباق الجديدة دي؟
أنا عايز أحجز جولة، من فضلك.	أود أن أعمل حجز لجولة ، من فضلك .	عايز أحجز جولة، من فضلك.
اسمي ساتو . اتصلت من شوية . عايز اسجل دخول، من فضلك .	اسمي ساتو . أنا اتصلت منذ قليل . أود تسجيل دخولي الفندق ، فضلا .	اسمي ساتو. أنا كلمت من شوية. عايز أسجل دخولي في الفندق، من فضلك.
ممكن تعمل اللي تقدر عليه عشان تكون موجود في المعاد؟	هل يمكن أن تفعل ما بوسعك لتصل في الوقت المحدد ؟	ممكن تعمل اللي تقدر عليه عشان توصل في المعاد؟
تمام، في الحالة ديه متهيألي انه احسن اجرب شركة تانية .	حسناً ، في تلك الحالة أعتقد أنه من الأفضل أن أجرب شركة أخرى .	طيب، في الحالة دي أعتقد إنه أحسن أجرب شركة تانية.
امتى حنكون في الجو؟	متى سنقلع ؟	هنقلع إمتى؟
لا مؤاخذة، مش قادر الاقي كاميرتي .	معذرة . لا أستطيع إيجاد الكاميرا الخاصة بي .	عفواً، مش قادر ألاقي الكاميرا بتاعتي.
أكيد، يا استاذ . أسمك ايه؟	بالتأكيد يا سيدي . ما اسمك ؟	أكيد يا فندم. اسمك إيه؟
ممكن تتصور معانا؟	هل تأخذ صورة معنا ؟	تاخد صورة معانا؟
اهلا . انا متأسف هو دلوقتي في أجتماع .	آلو . أن آسف إنه الآن في اجتماع .	ألو. آسف، هو دلوقتي في اجتماع.
السيدات والسادة، قبل الطيران بنطلب من حضراتكم تقفلوا أي أجهزة إلكترونية، زي الكمبيوتر الشخصي، السي دي بلايرزد، الموبيلات، والألعاب الإلكترونية. من فضلكم عدم استخدامها لحد أول عشر دقايق بعد الطيران.	سيداتي سادتي ، قبل الإقلاع نطلب منكم إغلاق كل الأجهزة الإلكترونية ، بما فيها الحاسبات الآلية ، ومشغلات الاسطوانات المدمجة ، والهواتف الخلوية ، والألعاب الإلكترونية . من فضلكم توقفوا عن استعمال أياً منها إلا بعد عشر دقائق من الإقلاع .	سيداتي سادتي، قبل الإقلاع نطلب منكم إغلاق كل الأجهزة الإلكترونية، بما فيها الكمبيوترات، ومشغلات الاسطوانات، والموبايلات، والألعاب الإلكترونية. من فضلكم توقفوا عن استخدامها لحد بعد 10 دقايق من الإقلاع.
فين العلبة؟	أين العلبة ؟	فين العلبة؟
أكيد في ناس هنا من كل حتة في العالم.	لابد أن ثمة أناس من جميع أنحاء العالم في هذا المكان .	أكيد فيه ناس من كل حتة في العالم هنا.
تكلفة المواصلات واحده لنص البلد؟	هل هو سعر ثابت لوسط البلد ؟	السعر ده ثابت لوسط البلد؟
لو سمحت دخل رقمك السري .	من فضلك ادخل رقم هويتك الشخصية .	من فضلك دخل رقم هويتك الشخصية.
عايز أحجز ملعب التنس على الساعة تلاتة الضهر لمدة ساعة.	أريد أن أحجز ملعب تنس في الثالثة ظهراً لمدة ساعة .	عايز أحجز ملعب تنس الساعة 3 الظهر لمدة ساعة.
ممكن أحجز؟	هل يمكن أن أحجز ؟	ممكن أحجز؟
ممكن استنى هنا؟	هل يمكنني أن أنتظر هنا ؟	ممكن أستنى هنا؟
واحدة واربع دقايق الضهر.	واحد صفر أربعة مساءا .	1:04 مساءً.
شكرا. بيعمل ايه؟	شكرا . ما نوع الوظائف التي تقوم بها ؟	شكراً. إيه نوع الوظايف اللي بتعملها؟
القطر لشيكاغو هايتحرك من رصيف خمسة؟	هل القطار إلى شيكاغو يغادر من الرصيف خمسة .	القطار اللي رايح شيكاغو بيطلع من الرصيف 5؟
أنا تهت. احنا فين؟	لقد ضللت الطريق أين نحن ؟	تهت، إحنا فين؟
حجمه أد إيه؟	ما حجمه ؟	حجمه إيه؟
عاوز أشتري طعوم.	أريد شراء طعم أسماك .	عايز أشتري طعم سمك.
بتدور على أى مطعم؟ عايز عشا بس، او بتدور على مطعم و بار؟	ما نوع المطعم الذي تبحث عنه ؟ هل تريد فقط تناول العشاء , أم أنك تبحث عن مطعم فيه بار ؟	إيه نوع المطعم اللي بتدور عليه؟ عايز بس تتعشى ولا بتدور على مطعم فيه بار؟
عايز كرافته .	أود الحصول على رابطة عنق .	عايز كرافتة.
حاجة حلوة؟	بعض الحلوى ؟	شوية حلوى؟
لو سمحت بلاش تكدب على .	من فضلك ، لا تسحب قدمي .	من فضلك، ما تشدش رجلي.
عايز اشوف كنيسة الثالوث .	أبغي رؤية كنيسة الثالوث .	عايز أشوف كنيسة الثالوث.
حد نشل محفظتي مني .	شخص ما انتزع حافظة نقودي مني .	حد خطف محفظتي مني.
ازاي اوصل ل الامباير ستات بيلدينج من هنا؟	كيف أصل إلى مبنى إمباير ستيت من هنا ؟	أوصل إزاي لمبنى إمباير ستيت من هنا؟
ممكن نص لتر لبن؟	هل لي بعبوتين من اللبن كل منها ربع جالون ؟	ممكن عبوتين لبن، كل واحدة ربع جالون؟
أنا فاهم. تفتكر حقدر آخدهم؟	أدرك هذا . هل تظن أني سأستطيع الحصول عليها ؟	فاهم ده. تفتكر أقدر أحصل عليها؟
لو هتدخن، لو سمحت انقل مكانك للصفوف من أربعين لحد خمسين.	إذا كنت ستدخن ، من فضلك انتقل إلى الصفوف من رقم أربعين حتى خمسين .	لو هتدخن، من فضلك انقل للصفوف من 40 لحد 50.
عايز عربية اوتوماتيك ما بتستهلكش بنزين كتير .	أرغب في سيارة أوتوماتيك قادرة علي قطع مسافات كبيرة .	عايز عربية أوتوماتيك تمشي مسافات طويلة.
خليني اشوف . خليني اجيبلك جرنان انجليزي .	دعنا نرى . دعني أحصل على جريدة إنجليزية .	خلينا نشوف. ممكن أجيب جورنال إنجليزي؟
ممرضة، تعالي بسرعة .	أيتها الممرضة ، احضري سريعا .	يا ممرضة، تعالي بسرعة.
لو سمحت نضف الهدوم ديه .	من فضلك نظف هذه الملابس .	من فضلك نظف الهدوم دي.
انا فاكر اني اتصورت في المطعم اللي كنا بنتغدي فيه .	أذكر أنني التقطت صورة في المطعم حيث تناولنا الغداء .	فاكر إني أخدت صورة في المطعم اللي تغدينا فيه.
إيه أخباره؟	كيف تسير الأمور ؟	الأخبار إيه؟
أشكركم على دعوتي إني أستنى للعشا.	شكراً على دعوتك لي للبقاء من أجل تناول العشاء .	شكراً على دعوتك للعشا.
معنديش هوايات. بس بشتغل بجد، زي معظم اليابانيين ما بيعملوا.	ليس لدي هوايات . فقط الاجتهاد في العمل مثلي مثل أغلب اليابانيين .	ماعنديش هوايات. بس الشغل، زي أغلب اليابانيين.
أيوه، ديه رحلتي الاولى .	نعم ، إنها أول رحلة لي .	أيوة، دي أول رحلة ليا.
ياخد وقت اد ايه؟	كم من الوقت يستغرق ؟	بياخد وقت قد إيه؟
إمتى، يافندم؟	متى ، يا سيدي ؟	إمتى، يا فندم؟
محتاج اني ابلغ عن ده؟	هل أنا بحاجة إلى الإعلان عن هذا ؟	محتاج أعلن عن ده؟
ممكن اشتري تذكرة عالبوابة؟	هل يمكنني شراء تذكرة عند البوابة ؟	ممكن أشتري تذكرة عند البوابة؟
العفو. بكل سرور.	أهلاً بك . كان ذلك مدعاة لسروري .	أهلاً بيك. ده شرف ليا.
عاوز محول فولت و فيش و برايز . الفولت في البلد ديه مختلف عن الفولت عندنا، و كمان الاجهزه ديه .	أريد محول كهربي وفيش وبرايز . إن الجهد الكهربي في هذا البلد مختلف عن بلادنا ، وكذلك الأجهزة الكهربائية .	عايز محول كهربا وفيش وبرايز. الجهد الكهربائي هنا غير بلدنا، وكمان الأجهزة الكهربائية.
فيه حاجة غلط في عداد الصور.	يوجد شيء ما خطأ في عداد اللقطات .	فيه حاجة غلط في عداد اللقطات.
ممكن تبعتلي حمال عشان الشنط؟	هلا أرسلت حمالاً لأمتعتي .	ممكن تبعت حمال للشنط؟
حتاخد حوالي ساعة .	ستستغرق حوالي ساعة .	هتاخد حوالي ساعة.
فيه عندك اكل مش حراق او مشطشط؟	ألا يوجد طعام متبل وليس حارا جدا ؟	مفيش أكل متبل بس مش حراق قوي؟
ممكن تعلملي عليه على الخريطة؟	هل يمكنك أن تعلم عليها على هذه الخريطة ؟	ممكن تعلم عليها على الخريطة دي؟
فيه وجبات موجوده في مكان التزحلق عالجليد اللي عند المنحدر ده؟	هل هناك وجبات في مكان التزلج فوق هذا المنحدر ؟	في وجبات في مكان التزلج على المنحدر ده؟
أيوة، إحنا ممكن نظبط عشان نخلصه على بكرة بالليل.	نعم , يمكننا الحصول عليه منتهياً بحلول مساء غد .	أيوة، ممكن يكون جاهز بحلول بكرة بالليل.
مستنين اصحابنا ييجو .	نحن في انتظار حضور أصدقائنا .	مستنيين أصحابنا ييجوا.
ساعتي وقفت .	توقفت ساعتي .	ساعتي وقفت.
ده جوزي .	هذا هو زوجي .	ده جوزي.
عندك أي حلويات سعراتها الحرارية قليلة؟	هل لديك أية حلويات منخفضة السعرات ؟	عندك حلويات قليلة السعرات؟
لو سمحت ورينى واحد أصغر شوية.	من فضلك أرني واحد أصغر قليلاً .	وريني واحد أصغر شوية، من فضلك.
المنتج بتاعك يختلف عن بقيت المنتجات اللي شبهه ف إيه؟	ما وجه الاختلاف بين منتجك ومنتج منافسيك ؟	إيه الفرق بين منتجك ومنتج المنافسين؟
أكيد. اتفضل.	بالتأكيد تفضل .	أكيد، تفضل.
للاسف، كل الأوض الفردي محجوزة. بس لسه فاضل أوض زوجي قليلة فاضية.	لسوء الحظ كل الغرف المفردة محجوزة ، ولكن لا يزال لدينا بضعة غرف مزدوجة .	للأسف، كل الغرف المفردة محجوزة، بس عندنا شوية غرف مزدوجة.
حرقت ايدى اليمين بالمية السخنة اللى فى الحلة.	لقد أصيبت يدي اليمنى بحروق من المياه الساخنة في الوعاء .	إيدي اليمين اتلسعت من المية السخنة في الحلة.
أيو، هو ده. بعدين، إنت ممكن تسجل هنا مستر يامادا؟	نعم ، هو . إذن مسجل هنا يا سيد يامادا ؟	أيوة، هو. مسجل هنا يا أستاذ يامادا؟
اعذرني. ممكن أعدي، من فضلك؟	معذرة . هل يمكنني المرور ، من فضلك ؟	عفواً، ممكن أعدي، من فضلك؟
أحسنلي امسك محفظتي كويس، علشان لو حد حاول يخطفها .	كان من الأفضل أن أحكم قبضتي على حافظة نقودي ، في حال حاول أي شخص اختطافها .	كان لازم أمسك المحفظة كويس، عشان لو حد حاول يخطفها.
فين المول؟	أين مركز التسوق ؟	فين مول التسوق؟
أنا باشتغل ف شركة تجارية.	أعمل في شركة تجارية .	بشتغل في شركة تجارية.
عايز أرجع طوكيو على يوم الجمعة.	أريد أن أعود إلى طوكيو قبل يوم الجمعة .	عايز أرجع طوكيو قبل الجمعة.
في الحالة دي، جدول الأجرة موجود قرب كرسي السواق.	في هذه الحالة , يوجد جدول بالتعريفات بجوار مقعد السائق .	في الحالة دي، فيه جدول بالتعريفات جنب كرسي السواق.
عشرين دولار في الساعة، اختر اللي انت عايزه .	عشرون دولاراً لساعة , انتقي ما تشاء .	عشرين دولار في الساعة، اختار اللي يعجبك.
انا بأفرق شعري من هنا .	أنا أفرق شعري من هنا .	بفرق شعري من هنا.
وبعدين، أنا عايز أجذب إنتباهك للجدول.	بعد ذلك ، أريد أن ألفت انتباهك لخريطة رقم واحد شرطة ثلاثة .	بعدين، عايز ألفت نظرك للخريطة رقم واحد شرطة ثلاثة.
عايز الياف صتاعية .	أريد بعض الألياف الصناعية .	عايز شوية ألياف صناعية.
تمام. من هنا لو سمحت. هاوريك أوضتك فين.	حسناً . خذ هذا الاتجاه . من فضلك ، سأوصلك إلى غرفتك .	طيب. امشي من هنا. من فضلك، هوصلك لأوضتك.
بيقولو الانفلونزا منتشره هناك .	يقولون إن الأنفلونزا منتشرة هناك .	بيقولوا إن الأنفلونزا منتشرة هناك.
عايز أقعد بأقل من خمسين دولار.	أفضل أن لا يصل السعر إلى خمسين دولار .	أفضل إن السعر ما يوصلش لخمسين دولار.
أنا خدت اللي إنت عاوزه بالظبط. ممكن أقترح عليك ده؟	لقد فهمت ما أردت أنت بالضبط . هل لي أن اقترح ذلك ؟	فهمت إنت عايز إيه بالظبط. ممكن أقترح حاجة؟
هو الكمسري بيقول ع المحطات؟	هل يعلن قاطع التذاكر عن المحطات ؟	هل قاطع التذاكر بيعلن عن المحطات؟
باي باي .	مع السلامة .	مع السلامة.
دول هدايا لأصحابي .	هذه هدايا لأصدقائي .	دي هدايا لصحابي.
انا بأسأل ان كان عندك تذاكر بتتباع في يوم العرض.	ترى ، هل لديكم أية تذاكر تُباع في يوم العَرْض ؟	هل عندكم تذاكر بتتباع في يوم العرض؟
ممكن ترشحلي أماكن كويسة لرحلات اليوم الواحد؟	هلاّ زكيت لي بعض الأماكن الطيبة لزيارتها نهارا ؟	ممكن ترشح لي أماكن كويسة أزورها بالنهار؟
ممكن اخد ديه و ديه، من فضلك؟	هل لي بهذه وهذه ، من فضلك ؟	ممكن آخد دي ودي، من فضلك؟
تاخد وقت اد ايه من لوس انجلوس لسان فرانسيسكو؟	كم يستغرق الوقت من لوس أنجلوس إلى سان فرانسسكو ؟	بياخد وقت قد إيه من لوس أنجلوس لسان فرانسيسكو؟
ممكن ترشحلي فندق يكون نضيف، و مش غالي؟	أيمكنك أن توصي بفندق نظيف وغير باهظ الأسعار ؟	ممكن ترشح فندق نظيف ورخيص؟
عايز أنام.	أود أن أنام .	عايز أنام.
إيه، إنت. إنت بتعمل إيه في عربيتي؟	يا أنت . ماذا تفعل داخل سيارتي ؟	يا إنت. إيه اللي بتعمله في عربيتي؟
ممكن تبعتلي شاي و عيش و زبدة؟ ديه أوضة الفين اربعة و تلاتين .	هل لك أن تحضر لي شاي وخبز وزبد ؟ هذه غرفة رقم اثنان صفر ثلاثة أربعة .	ممكن تجيب لي شاي وعيش وزبدة؟ أوضة رقم 2034.
بتقبل شيكات سياحية؟	هل تقبلون شيكات سياحية ؟	بتقبلوا شيكات سياحية؟
تمام، حضرتك . عالحجم الوسط ممكن نقدملك عربية فورد ميركيوري سابل . كده كويس؟	حسنا ، يا سيدي . في الحجم المتوسط نعرض عليك فرو السمور من نوع " ميركوري " ، فهل ذلك يوافقك ؟	طيب، يا فندم. عندنا فرو سمور "ميركوري" في الحجم المتوسط، يناسبك؟
إيه شكل الموديل اللي إنت عايزه؟	أي الموديلات تريدها ؟	عايز أنهي موديلات؟
ده التهاب زايده حاد مع تمزق . لازم تروح المستشفى حالا .	إنه ألم حاد ناتج عن التهاب الزائدة الدودية مصحوب بتمزق . يجب أن تذهب إلى المستشفى فوراً .	ده ألم حاد من التهاب الزايدة الدودية ومعاه تمزق. لازم تروح المستشفى فوراً.
واو . اد ايه خدمة كبيرة .	أوو . يا لها من حصة طعام ضخمة .	أووه. الوجبة دي كبيرة جداً.
انا؟ الشطرنج لعبة ممتازة بالنسبه لي .	هل أنا كذلك ؟ الشطرنج لعبة مثالية لي .	أنا كده؟ الشطرنج لعبة مناسبة لي.
ممكن تحطه في الصندوق؟	هل يمكنك أن تضعها في علبة ؟	ممكن تحطها في علبة؟
[truncated: 7,585 more rows]
