# Supplementary material
Source: ML conference proceedings conference paper supplement (https://aclanthology.org/2025.wacl-1.11)
Supplement: OptionalSupplementaryMaterial [file sample of Cairo-MSA Children's Corpus.xlsx]

## Sheet: Sheet1
Original Text	Egyptian Dialect
Title =” حكاية أبوذنيبة	Title =” حكاية أبوذنيبة
_ يوه ه ه ... لم يحن موعد خروجنا من هذا السجن.	يوووه... لسه مجاش وقت خروجنا من السجن ده.
لن انتظر سأخرج مبكرا، لقد اكتمل تكوينى هممممم لماذا أبقى؟	مش هستنى، هخرج بدري، أنا خلاص كملت... هممم ليه أفضل؟
لابد أن أتحدى الطبيعة.	لازم أتحدى الطبيعة.
حدث أبوذنيبة نفسه ضجرا ... وقرع بذيله.	أبو دنب كلم نفسه وهو زهقان... وخبط بديله.
كش.. كرع.. كرع جدار البيضة وكسره، وخرج، فوجد بقية إخوته داخل البيض ينتظرون اكتمال نموهم وإذن الطبيعة.	كش.. طاخ.. طاخ خبط في جدار البيضة وكسرها، وطلع، لقى باقي إخواته جوه البيض مستنيين يكملوا نموهم وإذن الطبيعة.
تدحرج أبوذنيبه متخلصا من قشرة البيض، ومكونات الحياة، ونظر مشمئزا لبقية البيض الساكن.	أبو دنب اتدحرج وخلص من قشر البيضة، وحاجات الحياة، وبص باشمئزاز للبيض الباقي الساكت.
وسبح نحو رمال الشاطى عند النهر.	وعام ناحية رمل الشط عند النهر.
حيث وضعت التماسيح البيض مدفونا.	اللي التماسيح حطت فيه البيض مدفون.
انتظر يوما كاملا، متمددا فوق الرمال، تارة وداخل المياه تارة أخرى. حتى سمع ضجيج الحياة القادم من الشاطئ، فسبح باتجاه الضجيج، لقد فقس بيض التماسيح وسبح الصغار، تجاه النهر وظن نفسه منهم وتبعهم نحو النهر.. مبتعدا عن إخوته الذين فقسوا من بعده والتفت قائلا لهم:	استنى يوم كامل، متمدد فوق الرمل، ساعة وجوه الميه ساعة. لحد ما سمع صوت الحياة جاي من الشط، فعام ناحية الصوت، بيض التماسيح فقس والصغيرين عاموا، ناحية النهر وافتكر نفسه منهم وتبعهم للنهر.. بعيد عن إخواته اللي فقسوا بعده وبص لهم وقال:
أنا لست منكم أنظروا إلى ضآلتكم!!	أنا مش منكم، بصوا لصغر حجمكم!!
ولون أجسادكم الطينية !.	ولون جسمكم الطيني!.
أنا ابن تمساح.	أنا ابن تمساح.
سوف أذهب من هنا لأهلي قبيلة التماسيح الجميلة..	هروح من هنا لأهلي قبيلة التماسيح الحلوة..
إنهم لا يشبهونكم.	هما مش شبهكم.
وبصق عليهم مودعا وهم ينظرون إليه ملوحين له بإذنابهم النابتة حديثا: أنت تشبهنا تعال إلينا لا تتركنا ..أعارهم أذن صماء ومضى..	وبصق عليهم وهو ماشي وهما بيبصوله ويلوحوله بديولهم الجديدة: إنت شبهنا تعالى معانا متسيبناش.. عمل نفسه مش سامع ومشي..
كانت صغار التمساح تضرب المياه بقوة واثقة من نفسها وتقفز هنا وهناك.	صغار التمساح كانت بتضرب الميه بقوة وثقة وبتنط هنا وهناك.
عندما اكتمل تكوينه صار ضفدعا.	لما كمل نموه بقى ضفدع.
فلفظته صغار التماسيح وابتعدت عنه قائلين له:	فصغار التماسيح رفضوه وبعدوا عنه وقالوله:
اذهب بعيدا عنا.	امشي بعيد عننا.
أبحث عن أهلك أنت لست منا..	دور على أهلك، إنت مش مننا..
أنت ضفدع!	إنت ضفدع!
صرخ فيهم: لا أنا تمساح..	زعق فيهم: لأ أنا تمساح..
وفرض نفسه عليهم حتى ضجروا منه، ومن شكله القميء. فذهبوا به إلى جدهم الكبير الذي يعلم أسرار الأجناس . وينظم للتماسيح حياتهم فهو محل احترامهم وهيبتهم في النهر والجزيرة.	وفرض نفسه عليهم لحد ما زهقوا منه، ومن شكله الوحش. فراحوا بيه لجدهم الكبير اللي عارف أسرار الأنواع. وبينظم للتماسيح حياتهم عشان هو محل احترامهم وهيبتهم في النهر والجزيرة.
كان ساكنا مغمض العينين فاتحا فمه، للعصافير تقوم بتنظيفه وتخرج البقايا من بين أسنانه الحادة غير خائفة.	كان ساكت مغمض عينيه وفاتح بقه، للعصافير تنضفه وتطلع البقايا من بين سنانه الحادة من غير خوف.
ارتعد أبوذنيبة هلعا حين رآه ،فتساقطت الدموع من عينيه غزيرة ، أراد أن يثير شفقته... فتح التمساح نصف عينه والأخرى مغلقة ، مستمتعا بنقرات مناقير العصافير التي تسرى خدرا لذيذا في جسده الضخم المسترخي. منبطحا على رمال الجزيرة الناعمة.	أبو دنب ارتعش من الخوف لما شافه، فالدموع نزلت من عينيه كتير، عاوز يخليه يشفق عليه... التمساح فتح نص عينه والتانية مقفولة، مستمتع بنقر مناقير العصافير اللي بيسري خدر حلو في جسمه الكبير المرتاح. منبطح على رمل الجزيرة الناعم.
لا يكدر صفو حياته سوى الدخلاء.	مفيش حاجة بتعكر صفو حياته غير الغرباء.
وسأله غير مرحبا: ماذا تريد أيها الضفدع ؟	وسأله من غير ترحيب: عاوز إيه يا ضفدع؟
قال بصوت حزين: منذ صغرى وأنا مع صغاركم وكنت أحسب نفسي منكم.	قال بصوت حزين: من وأنا صغير وأنا مع صغاركم وكنت فاكر نفسي منكم.
عندما اكتمل تكوينى صرت ضفدعا.	لما كملت نموي بقيت ضفدع.
لم استطيع قهر قانون الطبيعة. وأغير تكوينى ،ولم أختار أن أكون ضفدعا ، ولكن عشت مع صغاركم لا أعرف إخوة غيرهم .	مقدرتش أغلب قانون الطبيعة. وأغير شكلي، ومخترتش أكون ضفدع، بس عشت مع صغاركم معرفش إخوات غيرهم.
أطلب سماح العيش بينكم ،والاعتراف بى تمساحا معاقا أو مخلقا أو...	بطلب إنكم تسمحولي أعيش معاكم، وتعترفوا بيا تمساح معاق أو مشوه أو...
زفر التمساح زفرة عارمة، تركت حفرة في الرمال أسفل فمه، ففرت العصافير وجلة، ظنته سيطبق فكه عليها من الغضب.	التمساح زفر زفرة جامدة، سابت حفرة في الرمل تحت بقه، فالعصافير طارت خايفة، افتكروه هيقفل بقه عليهم من الغضب.
وفتح عينيه على اتساعهما مزمجرا، أنت ضفدع حقير تركت أهلك لتعيش معنا وأنت لا تشبهنا. فكيف نثق بك وقد خنت قانون الطبيعة وتركت جنسك وعشيرتك .	وفتح عينيه على الآخر وهو بيزأر، إنت ضفدع حقير سبت أهلك عشان تعيش معانا وإنت مش شبهنا. إزاي نثق فيك وإنت خنت قانون الطبيعة وسبت نوعك وعيلتك.
قال الضفدع: أرى بينكم كائنات أخرى تعيش في المياه معكم .	قال الضفدع: أنا شايف بينكم كائنات تانية عايشة في الميه معاكم.
قاطعه التمساح هل أنت مثلهم ألم ترى صورتك على صفحة المياه؟...	التمساح قاطعه: هو إنت زيهم؟ مشفتش صورتك على وش الميه؟...
” Title =” دفع الثمن المناسب	” Title =” دفع الثمن المناسب
دعا نشفان أصدقائه إلى العشاء، وكان يطهو لهم قطعة لحم غضة، وفجأة علم أن ما لديه من الملح نفد.	نشفان عزم صحابه على العشا، وكان بيطبخلهم حتة لحمة طرية، وفجأة عرف إن الملح اللي عنده خلص.
فنادى نشفان ابنه وقال له:	فنادى نشفان على ابنه وقاله:
- اذهب بسرعة إلى القرية واشتر بعض الملح، ولكن ادفع ثمناً مكافئاً له، لا هو بالكثير ولا بالقليل.	- روح بسرعة عالبلد واشتري شوية ملح، بس ادفع تمن مناسب، مش كتير ولا قليل.
دُهش ابنه وقال:	ابنه اتفاجئ وقال:
- أفهم جيداً لماذا لا أدفع الكثير يا أبى، ولكن ماذا لو اشتريته بسعر زهيد، ألا يوفر لنا ذلك المزيد من المال؟	- فاهم كويس ليه ما أدفعش كتير يا بابا، بس لو اشتريته برخيص، مش ده هيوفرلنا فلوس أكتر؟
فأجاب الأب:	فرد الأب:
- هذا سيكون معقول فى مدينة كبيرة، ولكن هذا الشىء من الممكن أن يدمر قرية كقريتنا.	- ده ممكن يكون معقول في مدينة كبيرة، لكن الحكاية دي ممكن تخرب بلد زي بلدنا.
عندما استمع ضيوف نشفان إلى حواره من ابنه، أرادوا معرفة كيف لا يشترون الملح بسعر زهيد إن استطاعوا ذلك، فأجاب نشفان:	لما ضيوف نشفان سمعوا كلامه مع ابنه، حبوا يعرفوا إزاي ما يشتروش الملح برخيص لو قدروا، فرد نشفان:
- السبب الوحيد الذى يجعل انساناً يبيع الملح أرخص من ثمنه هو حاجته الشديدة إلى المال، والذى يريد أن يستفيد من هذا العوز هو انسان ليس لديه أدنى احترام للعرق والجهد المبذول وكفاح الانسان الذى انتجه.	- السبب الوحيد اللي يخلي حد يبيع الملح أرخص من تمنه هو إنه محتاج الفلوس أوي، واللي عايز يستغل الحاجة دي هو إنسان معندوش أي احترام لتعب وجهد وكفاح الإنسان اللي عمله.
فقال الضيوف:	فقالوا الضيوف:
- ولكن هذا الشىء البسيط لا يمكن أن يدمر قرية.	- بس الحاجة البسيطة دي مش ممكن تخرب بلد.
فقال نشفان:	فقال نشفان:
- فى البداية كان هناك قدر ضئيل من الظلم، ولكن كل انسان أتى بعد ذلك أضاف لهذا القدر من الظلم نصيبه ..	- في الأول كان في ظلم صغير، لكن كل واحد جه بعد كده زود على الظلم ده شوية..
دائما ضع فى حسبانك أنه كان شيئاً ضئيلاً وبلا أهمية، ولكن انظر إلى ما وصلنا إليه اليوم.	دايماً حط في بالك إنه كان حاجة صغيرة ومالهاش لازمة، بس بص إحنا وصلنا لإيه النهاردة.
Title =” أقاصيص تربوية للأطفال”	Title =” أقاصيص تربوية للأطفال”
وحين أعطته المعلمة وظيفة رياضيات قال له:	ولما المدرسة إدته واجب رياضيات قالتله:
- إذا استطعت حل المسائل بشكل صحيح سأدع جميع التلاميذ يصفقون لك.	- لو عرفت تحل المسايل صح، هخلي كل التلاميذ يصقفولك.
فرح عدنان وأعجبته الفكرة، لأنه لم يعتد أن يصفق أحد له بسبب كسله، فعاد مسرعاً إلى البيت ودرس درس الرياضيات بشكل ممتاز ففهمه جيداً، ثم انتقل إلى التمارين والمسائل واستطاع أن يحلها جميعاً.	عدنان فرح والفكرة عجبته، عشان مكانش متعود حد يصقفله بسبب كسله. فرجع البيت بسرعة وذاكر درس الرياضيات كويس أوي وفهمه، وبعدين حل التمارين والمسايل كلها.
بعد قليل قال لنفسه، الأمر بسيط إذن، لماذا لا أدرس باقي المواد بهذه الطريقة!	شوية وقال لنفسه، "طب ما الموضوع سهل، ليه ما أذاكرش باقي المواد بالطريقة دي!"
وهكذا وضع جدول اليوم التالي وحضر جميع الدروس وحل جميع الوظائف، وعندما انتهى كان المساء قد حل وشعر بالنعاس فنام حتى الصباح، ونسي اللعب تماماً ذلك اليوم.	وكده عمل جدول لليوم اللي بعده وحضر كل الدروس وحل كل الواجبات، ولما خلص كان الليل جه وحس بالنوم فنام لحد الصبح، ونسي اللعب خالص اليوم ده.
في اليوم التالي ذهب عدنان إلى المدرسة، عندما شاهدت معلمة الرياضيات مسائل الرياضيات التي حلها عدنان بشكل صحيح ومرتب فرحت كثيرا وطلبت من جميع التلاميذ أن يصفقوا تحية لزميلهم عدنان.	في اليوم التاني عدنان راح المدرسة، ولما مدرسة الرياضيات شافت مسايل الرياضيات اللي حلها عدنان صح ومرتبة فرحت أوي وطلبت من كل التلاميذ يصقفوا لزميلهم عدنان.
وعندما جاء معلم القواعد ورأى إعراب الكلمات صحيحا سر أيضا وطلب من التلاميذ أن يصفقوا تحية لعدنان.	ولما جه مدرس القواعد وشاف إعراب الكلمات صح، انبسط برضه وطلب من التلاميذ يصقفوا لعدنان.
وكذلك صفق له زملاؤه في حصة العلوم وفي حصة الجغرافيا وفي حصة الإملاء.	وكمان زمايله صقفوله في حصة العلوم وفي حصة الجغرافيا وفي حصة الإملاء.
وهكذا شعر عدنان بسعادة كبيرة وهو يروي لأمه ما جرى له في المدرسة، فقد قال لها:	وكده عدنان حس بفرحة كبيرة وهو بيحكي لأمه اللي حصله في المدرسة، وقالها:
- لقد صفق لي جميع التلاميذ اليوم وفي جميع الحصص، وهم لا يصفقون إلا للتلميذ المحتهد.	- كل التلاميذ صقفولي النهاردة وفي كل الحصص، وهما ما بيصقفوش غير للتلميذ الشاطر.
فرحت الأم لتفوق ابنها عدنان ودعت له أن يوفقه الله في جميع دروسه.	الأم فرحت بتفوق ابنها عدنان ودعتله ربنا يوفقه في كل دروسه.
بعد قليل أحس عدنان بالشوق للخروج كي يلعب في الشارع، لكنه فكر قليلا وقال لنفسه:	شوية وعدنان حس إنه عايز يخرج يلعب في الشارع، بس فكر شوية وقال لنفسه:
"سأكتب جميع دروسي كما فعلت يوم أمس، ثم أذهب لكي ألعب إن بقي وقت للعب"	"هكتب كل دروسي زي ما عملت إمبارح، وبعدين أروح ألعب لو فضل وقت"
ناداه صديقه أحمد كي يلعب معه فأجاب بسرعة:	صاحبه أحمد ناداه عشان يلعب معاه فرد عليه بسرعة:
- لن ألعب الآن، علي أن أدرس دروسي أولاً	- مش هلعب دلوقتي، لازم أذاكر دروسي الأول
لكن أحمد نصحه باللعب أولا ثم العودة للدراسة.	بس أحمد نصحه يلعب الأول وبعدين يرجع يذاكر.
فكر عدنان قليلاً وقال لصديقه:	عدنان فكر شوية وقال لصاحبه:
- اسمع يا صديقي، لقد أحبني جميع المعلمين اليوم لأنني حضرت دروسي جيداً ولم ألعب يوم أمس	- اسمع يا صاحبي، كل المدرسين حبوني النهاردة عشان حضرت دروسي كويس ومالعبتش إمبارح
- إذا لعبت الآن سأعود متعباً وأنام فوراً دون دراسة شيء، كما كان يحدث معي سابقاً أم الآن فلن ألعب قبل إنهاء واجباتي لأنني أصبحت طالبا مجتهدا يصفق لي زملائي كلهم.	- لو لعبت دلوقتي هرجع تعبان وهنام على طول من غير ما أذاكر حاجة، زي ما كان بيحصل معايا قبل كده. أما دلوقتي مش هلعب قبل ما أخلص واجباتي عشان بقيت طالب مجتهد وزمايلي كلهم بيصقفولي.
- وهكذا نجحت خطة عدنان، فصار يدرس كثيراً ويلعب قليلاً بعد إنهاء جميع واجباته، فأحبه المعلمون والمدير ونال في نهاية العام الدراسي جوائز كثيرة في جميع المواد	- وكده خطة عدنان نجحت، فبقى يذاكر كتير ويلعب شوية بعد ما يخلص كل واجباته، فالمدرسين والمدير حبوه وفي آخر السنة الدراسية خد جوايز كتير في كل المواد
Title =” لا تُفرط فى الصندوق”	Title =” لا تُفرط فى الصندوق”
عمل الشيخ المسن طوال عمره، وعندما تقاعد عن العمل، اشترى مزرعة كبيرة لابنه ليديرها، وقرر أن يعيش بقية حياته جالساً فى شرفة البيت الكبير.	الراجل العجوز اشتغل طول عمره، ولما خرج عالمعاش، اشترى مزرعة كبيرة لابنه عشان يديرها، وقرر يعيش باقي حياته قاعد في بلكونة البيت الكبير.
عمل ابنه لثلاث سنوات، ولكن استياءه ازداد، وقال لرفاقه:	ابنه اشتغل تلات سنين، بس زهقه زاد، وقال لصحابه:
- إن أبى لا يعمل، ويقضى كل وقته محدقا فى الحديقة، فى الوقت الذى اعمل فيه كالعبد لإطعامه.	- أبويا مش بيشتغل، وبيقضي وقته كله باصص عالجنينة، في الوقت اللي أنا بشتغل فيه زي العبد عشان أأكله.
وفى يوم ما، قرر أن يضع حداً لهذا الموقف الغير عادل، فصنع صندوقاً خشبياً كبيراً، وحمله إلى الشرفة ثم قال لوالده:	وفي يوم، قرر يحط حد للموقف الظالم ده، فعمل صندوق خشب كبير، وشاله للبلكونة وقال لأبوه:
- أبت .. هل لديك مانع من أن تدخل هذا الصندوق؟	- يا بابا.. عندك مانع تدخل الصندوق ده؟
أطاعه الأب، فحمل الابن الصندوق فى شاحنته واتجه به إلى الجرف.	الأب سمع الكلام، فالابن شال الصندوق في العربية بتاعته وراح بيه ناحية الجرف.
فى الوقت الذى قرر فيه أن يرمى بالصندوق من فوق الجرف، سمع والده من داخل الصندوق يقول له:	في الوقت اللي قرر فيه يرمي الصندوق من فوق الجرف، سمع أبوه من جوه الصندوق بيقوله:
- يا بنى .. اقذف بى من فوق هذا الجرف إذا كنت مضطراً لذلك، ولكن حافظ على الصندوق، فقد سلكت مسلكاً أنت فيه القدوة، ومما لاشك فيه أن أبناؤك سيحتاجون الصندوق لك.	- يا ابني.. ارميني من فوق الجرف ده لو كنت مضطر، بس حافظ على الصندوق، عشان إنت عملت حاجة هتبقى قدوة، ومفيش شك إن ولادك هيحتاجوا الصندوق ده ليك.
Title =” أرنوب والتفاح ”	Title =” أرنوب والتفاح ”
في الطريق .. وبينما كان أرنوب مع أمّه عائدين إلى بيتهما ، صادفتهما السلحفاة	فالطريء .. وبينما كان أرنوب مع أمه راجعين لبيتهم ، قابلتهم السلحفاة
فبادرتها أمّ أرنوب بالتحيّة : -مرحباً يا صديقتي السلحفاة . إلى أين تذهبين ؟	فسلمت عليها أم أرنوب وقالت: -أهلاً يا صحبتي السلحفاة. رايحة فين؟
أجابتها السلحفاة : -إلى ضفة النهر. فقد سمعت من جارتنا السنجابة أنّ ثمار التفاح قد سقطت من أشجارها على الأض ، وأولادي يحبّون التفاح	ردت عليها السلحفاة: -رايحة على شط النهر. سمعت من جارتنا السنجابة إن التفاح وقع م الشجر عالأرض، وعيالي بيحبوا التفاح
قالت أمّ أرنوب : -ولكنّ الوقت متأخّر، والشمس شارفت على المغيب. لماذا لا تنتظرين حتّى الصباح؟	قالت أم أرنوب: -بس الوقت متأخر، والشمس قربت تغيب. ليه ما تستنيش للصبح؟
أجابتها السلحفاة : -لو ظلّ التفّاح على الأرض حتّى الصباح،فإنني أخشى أن تصل إليه دودة الأرض قبلي.	ردت عليها السلحفاة: -لو التفاح فضل عالأرض للصبح، بخاف إن دود الأرض يوصله قبلي.
ما إن سمع أرنوب بكلمة ( تفاح ) حتّى لعق شفتيه بلسانه،وتوسّل بأمّه قائلاً : -ماما.. أرجوك..أنا أحبّ التفّاح..دعيني أذهب مع عّمتي السلحفاة .	أول ما أرنوب سمع كلمة (تفاح) لحس شفايفه بلسانه، واتوسل لأمه وقال: -ماما.. معلش..أنا بحب التفاح..خليني أروح مع طنط السلحفاة.
أجابته الأمّ : -ولكن يا أرنوب ..	ردت عليه الأم: -بس يا أرنوب ..
قاطعتها السلحفاة : -سترافقاني أنتما الاثنان . فهذا سيخّفف علّي وحشة الطريق .	قاطعتها السلحفاة: -هتيجوا معايا انتوا الاتنين. ده هيخفف عليا وحدة الطريق.
قالت أمّ أرنوب : -اعذريني يا صديقتي السلحفاة.فزوجي سيحضر بعد قليل،وعليّ أن أعدّ له الطعام .	قالت أم أرنوب: -معلش يا صحبتي السلحفاة. جوزي هييجي كمان شوية، ولازم أحضرله الأكل.
قال أرنوب : -لقد سئمت أكل الجزر،وأشتهي أن آكل التفّاح .	قال أرنوب: -أنا زهقت من أكل الجزر، ونفسي آكل تفاح.
قالت السلحفاة : -إذن سترافقني بعد أن تسمح لك أمّك بذلك .	قالت السلحفاة: -طيب هتيجي معايا بعد ما أمك تسمحلك.
بعد أن أوصت الأرنبة ابنها الأرنوب أن يسمع كلام عمّته السلحفاة،وتعهّد لها بذلك،صعد أرنوب على ترس السلحفاة،متوجّهين إلى ضفة النهر.	بعد ما الأرنبة وصت ابنها أرنوب انه يسمع كلام طنط السلحفاة، ووعدها بكده، ركب أرنوب على ضهر السلحفاة، ومشيوا على شط النهر.
وفي الطريق شعر أرنوب أنّ السلحفاة بطيئة في مشيها،فنزل من على ترسها وهو يقول : -ما هذا يا عمتي السلحفاة ؟! لوبقيت تمشين هكذا فإنّنا لن نصل إلى ضفة النهر قبل الصباح .	فالطريق حس أرنوب إن السلحفاة بطيئة فمشيها، فنزل من على ضهرها وهو بيقول: -إيه ده يا طنط السلحفاة؟! لو فضلتي ماشية كده مش هنوصل شط النهر قبل الصبح.
ابتسمت السلحفاة قائلة : -لا تتعجّل يا أرنوب .. لم يبقَ إلاّ القليل .	ابتسمت السلحفاة وقالت: -متستعجلش يا أرنوب .. فاضل شوية بس.
فقال أرنوب : -لا .. سأسبقك إلى هناك .. لأجمع التفّاح وأبقى بانتظارك .	فقال أرنوب: -لأ .. هسبقك لهناك .. عشان أجمع التفاح وأستناكي.
ابتعد أرنوب عن السلحفاة مسرعاً،بينما ظلّت السلحفاة تناديه : -ارجع يا أرنوب..لقد تعهّدت لأمّك بأن تسمع كلامي .	بعد أرنوب عن السلحفاة بسرعة، والسلحفاة فضلت تنادي عليه: -ارجع يا أرنوب..انت وعدت أمك انك تسمع كلامي.
صاح أرنوب : -لقد مللت من خطواتك البطيئة .	صاح أرنوب: -أنا زهقت من خطواتك البطيئة.
كان ثعلوب يستلقي على بطنه,وهو يقاوم الجوع.. بانتظار الحصول على وجبة من الطعام, يملأ بها معدته الفارغة.	كان التعلب نايم على بطنه، وهو بيقاوم الجوع.. مستني ياكل أي حاجة يملا بيها بطنه الفاضية.
وفي هذه الأثناء أحسّ برائحة بدأت تنفذ في أنفه. فنهض وهو يحكّ أنفه ويقول : -هذه الرائحة أعرفها .. إنّها ليست غريبة عنّي.فأنفي لا يخطيء أبداً .	وفالوقت ده حس بريحة بدأت تدخل في مناخيره. فقام وهو بيحك مناخيره ويقول: -الريحة دي أعرفها .. مش غريبة عليا. مناخيري ما بتغلطش أبداً.
ثمّ داعب بطنه وهو يضحك ويقول : -لقد أتتك وجبة شهيّة يا معدتي العزيزة . آه ..ما أشهى طعم الأرانب!! .	وبعدين دلك بطنه وهو بيضحك ويقول: -أهي جتلك أكلة حلوة يا معدتي الغالية. آه .. ما أحلى طعم الأرانب!!
ما إن مّر أرنوب من أمام العشب الذي كان يختبيء فيه ثعلوب،حتى قفز عليه وأمسك به بأسنانه .	أول ما أرنوب عدى من قدام العشب اللي كان التعلب مستخبي فيه، نط عليه ومسكه بسنانه.
ارتعب أرنوب، وصار يصرخ بأعلى صوته : -النجدة .. النجدة .. الثعلب سيأكلني .. أنجدوني ..	ارعب أرنوب، وبدأ يصرخ بأعلى صوته: -النجدة .. النجدة .. التعلب هياكلني .. الحقوني ..
ولكنّ أحداً لم يسمع صيحات أرنوب واستغاثته.	بس محدش سمع صريخ أرنوب ونداءاته.
بعد أن وصلت السلحفاة إلى ضفة النهر ، ورأت ثمار التفاح تملأ الأرض،عرفت أنّ أرنوب لم يصل إليها .. وأنّه ربما يكون بحاجة للمساعدة .	بعد ما السلحفاة وصلت لشط النهر، وشافت التفاح مالي الأرض، عرفت إن أرنوب ما وصلش ليها .. وانه يمكن يكون محتاج مساعدة.
فقّررت أن تخبر صديقتها الأرنوبة بذلك ..لكنّها فكّرت ثم قالت : -ولكنّ رجوعي إلى بيت الأرنوبة سيستغرق وقتاً طويلاً ،وربّما يكون أرنوب في خطر . عليّ أن أتصرف بسرعة .	فقررت تقول لصاحبتها الأرنبة .. بس فكرت وقالت: -بس رجوعي لبيت الأرنبة هياخد وقت كتير، ويمكن أرنوب يكون في خطر. لازم أتصرف بسرعة.
في بيت ثعلوب كان أرنوب يصرخ متوسّلاً : -أرجوك يا ثعلوب .. لا تأكلني .. أنا خائف ..	في بيت التعلب كان أرنوب بيصرخ ويترجى: -معلش يا تعلب .. ما تاكلنيش .. أنا خايف ..
فضحك ثعلوب وهو يقول : -وأنا جائع .. كفاك ثرثرة ودعني أهيء مائدة الطعام *.	فضحك التعلب وهو بيقول: -وأنا جعان .. بلاش رغي وسيبني أجهز السفرة.
وراح ثعلوب يعدّ مائدته لاستقبال وجبة شهيّة . وضع الصحون والسكاكين .. لكنّه عندما بحث عن الشوكة لم يجدها .	وراح التعلب يجهز السفرة عشان ياكل أكلة حلوة. حط الأطباق والسكاكين .. بس لما دور على الشوكة ما لقاهاش.
فصاح : -ترى أين اختفت الشوكة ؟	فصاح: -يا ترى الشوكة راحت فين؟
لم يشعر ثعلوب إلاّ والشوكة تنغرس بقوّة في رجله ،وصوت يأتيه من الخلف يقول : -هذه هي شوكتك يا ثعلوب .. إيّاك أن تغدر بأصدقائك الحيوانات بعد الآن .	ما حسش التعلب إلا والشوكة بتتغرز جامد في رجله، وصوت جاله من وراه بيقول: -أهي الشوكة بتاعتك يا تعلب .. إوعى تغدر بصحابك الحيوانات تاني.
قفز ثعلوب من شدّة الألم فصاح : -آه .. آه رجلي ..	نط التعلب من الألم وصرخ: -آه .. آه رجلي ..
سارعت السلحفاة لإنقاذ أرنوب من الحبل ،وخرجا من بيت ثعلوب الذي انشغل بمعالجة رجله .	السلحفاة جريت تنقذ أرنوب من الحبل، وخرجوا من بيت ثعلوب اللي انشغل بمعالجة رجله.
احتضن أرنوب عّمته السلحفاة وهو يقول لها خجلاً : -لقد كنت بطيئة في مشيك يا عّمتي السلحفاة ،لكنّك كنت سريعة في إنقاذي .إني نادم على فعلتي هذه . ومن الآن لن أعصي كلام مَن هو أكبر منّي أبداً	أرنوب حضن عمته السلحفاة وقالها بخجل: -كنتي بطيئة في مشيك يا عمتي السلحفاة، بس كنتي سريعة في إنقاذي. أنا ندمان على اللي عملته. ومن دلوقتي مش هعصي كلام اللي أكبر مني أبداً.
Title =” الدب المغامر”	Title =” الدب المغامر”
كان السيد دب يرقد علي غصن كبير في اعلي الشجرة	كان المستر دب نايم على فرع كبير فوق الشجرة
اما السيده دبه فانها اختارت لطفلها الصغير دبدب مكانا مريحا و ارقدته فيه و جلست بجواره تحرسة	أما الست دبة فاختارت لابنها الصغير دبدب مكان مريح ونيمته فيه وقعدت جنبه تحرسه
و فجاه اشتعلت النار في الغابة	وفجأة ولعت النار في الغابة
صاحت السيده دبه النار النار	صرخت الست دبة: النار النار
فاستيقظ السيد دب و قال لزوجته اسرعي اسرعي الهرب الهرب	فصحي المستر دب وقال لمراته: بسرعة بسرعة نهرب نهرب
فحملت السيده دبه ولدها و جرت وراء زوجها	فشالت الست دبة ابنها وجريت ورا جوزها
اما دبدب فكان ينظر الي الوراء	أما دبدب فكان بيبص ورا
وصل الثلاثه الي غابة ثانية و ذهب السيد دب ليحضر لهم الطعام	وصلوا التلاتة لغابة تانية وراح المستر دب يجيبلهم الأكل
و جلس دبدب الصغير امام امه و راح يسالها عن النار و عن الاشياء التي راها في الطريق	وقعد دبدب الصغير قدام أمه وبدأ يسألها عن النار وعن الحاجات اللي شافها في الطريق
و يقول : اوه في الدنيا اشياء كثيرة لا اعرفها	وبيقول: أوه في الدنيا حاجات كتير مش عارفها
و في الليل نام السيد دب علي غصن	وبالليل نام المستر دب على فرع
و نامت السيده دبه علي غصن اخر	ونامت الست دبة على فرع تاني
اما دبدب الصغير فانه تظاهر بالنوم جنب امه	أما دبدب الصغير فعمل نفسه نايم جنب أمه
و قرب الصباح قال في نفسة : انزل لاشاهد الدنيا وحدي	ولما قرب الصبح قال لنفسه: هنزل أشوف الدنيا لوحدي
نزل دبدب و ترك اباه و امه نائمين	نزل دبدب وساب أبوه وأمه نايمين
و مشي وحدة في الطريق و هو فرحان	ومشي لوحده في الطريق وهو فرحان
و كان يقف عند كل شئ جديد و يحاول ان يعرفه	وكان بيقف عند كل حاجة جديدة ويحاول يعرفها
و اخيرا راي فرعا نازلا من شجرة فصنع منه ارجوحة و ركبها	وأخيراً شاف فرع نازل من شجرة فعمل منه مرجيحة وركبها
و كان دبدب يحب اللعب و الحركة مثل كل دب صغير	وكان دبدب بيحب اللعب والحركة زي أي دب صغير
فنسي نفسة و راح يلعب و يترجح في الارجوحة	فنسي نفسه وراح يلعب ويتمرجح في المرجيحة
و فجاه انكسر فرع الشجرة فوقع دبدب علي الارض و جرح راسة و سال منه الدم	وفجأة اتكسر فرع الشجرة فوقع دبدب على الأرض واتجرح راسه وسال منه الدم
راي دبدب الدم يسيل من جرحة فخاف و بكي	شاف دبدب الدم بيسيل من جرحه فخاف وعيط
و كانت غزاله طيبة ترعي بالقرب منه	وكانت في غزالة طيبة بترعى قريب منه
فقالت له : لا تبكي يا دبدب تعال نذهب للدكتورة	فقالت له: متعيطش يا دبدب تعالى نروح للدكتورة
و حملته و جرت به الي عياده الدكتورة	وشالته وجريت بيه لعيادة الدكتورة
و عند الترعة كانت الدكتورة ضفدعة قد انشات عياده تعالج فيها الحيوانات و الطيور	وعند الترعة كانت الدكتورة ضفدعة عاملة عيادة بتعالج فيها الحيوانات والطيور
فلما راتهما قادمين من بعيد خرجت لاستقبالهما و هي تقول : لا تخف يا دبدب تعال تعال	فلما شافتهم جايين من بعيد خرجت تستقبلهم وهي بتقول: متخافش يا دبدب تعالى تعالى
Title =”حلم أسامة”	Title =”حلم أسامة”
يقفز وهو يترنّم "ترلّلا.. ترلّلا، ترلّلا"	بينط وهو بيغني "ترلّلا.. ترلّلا، ترلّلا"
حين سمع هدير طائرة في السّماء، وقف ورفع رأسه إلى أعلى؛ محاولاً أن يرى هذه الطائرة!	لما سمع صوت طيارة في السما، وقف ورفع راسه لفوق؛ بيحاول يشوف الطيارة دي!
وتذكر سؤال معلِّمه للتلاميذ في الصّف: "ماذا تحبّ أن تكون في المستقبل؟"	وافتكر سؤال المدرس للتلاميذ في الفصل: "عايز تبقى إيه في المستقبل؟"
وحينها فكر أسامة: هل أقول: أحبّ أن أكون معلماً، أو لاعباً رياضياً؟"	وساعتها أسامة فكر: أقول إيه، عايز أبقى مدرس، ولا لاعب رياضة؟"
تذكر صياح التلاميذ "أنا أحب أن أكون سائق سيارة	افتكر التلاميذ وهما بيصوتوا "أنا عايز أبقى سواق عربية
أنا أريد أن أكون شرطي مرور، وأنا سأكون فناناً، أنا… أنا…"	أنا عايز أبقى ظابط مرور، وأنا هبقى فنان، أنا... أنا..."
كانت الطائرة قد غابت عن عيني أسامة وصوت محركها تلاشى أيضاً	كانت الطيارة اختفت من قدام عينين أسامة وصوت موتورها راح كمان
لكن مازال صدى ذلك الصّوت في ذهن أسامة	بس لسه صدى الصوت ده في دماغ أسامة
صاح أسامة بصوت عالٍ: أحبّ أن أكون طياراً	أسامة صرخ بصوت عالي: أنا عايز أبقى طيار
وضاع صوته في الفضاء مثل صوت الطائرة	وصوته راح في الهوا زي صوت الطيارة
وبدأ خياله يصوّر لـه نفسه طياراً يقود طائرة حربية تحمي سماء الوطن	وبدأ خياله يصور له نفسه طيار بيسوق طيارة حربية بتحمي سما الوطن
ثم طياراً يقود طائرة زاخرة بالرّكاب	وبعدين طيار بيسوق طيارة مليانة ركاب
كان يقف ويراقب السماء	كان واقف وبيراقب السما
شاهد غيوماً متفرقة وبضع حمامات تطير في سرب واحد	شاف سحاب متفرق وشوية حمام بيطيروا مع بعض
عاد يقفز فرحاً وهو يردّد: ترلّلا.. تلالّلا.. أنا طيار، أنا طيار	رجع ينط من الفرحة وهو بيقول: ترلّلا.. تلالّلا.. أنا طيار، أنا طيار
Title =”بهية وأحلامها الوردية”	Title =”بهية وأحلامها الوردية”
بهية فلاحة شابة تتقاضى يوميا قدرا من الحليب مقابل عملها لدى احد كبار تجار الماشية	بهية فلاحة صغيرة بتاخد كل يوم شوية لبن مقابل شغلها عند واحد من كبار تجار المواشي
وذات صباح خطر لها أن تبيع اجر يوم أي قدرا من الحليب في المدينة	وفي يوم من الأيام فكرت تبيع أجرة يوم يعني شوية لبن في المدينة
وهاهي تسير منتصبة القامة وقد استقر قدر الحليب فوق ضفيرة من القماش فوق رأسها	وأهي ماشية منتصبة وحاطة قدر اللبن فوق لفة قماش على راسها
وإثناء سيرها أخذت تفكر في النقود التي ستحصل عليها من بيع الحليب	وهي ماشية قعدت تفكر في الفلوس اللي حتجيبها من بيع اللبن
وقالت لنفسها هذه النقود سوف اشتري بها خمسين بيضة واضعها في الحاضنة فتعطيني كتاكيت	وقالت لنفسها الفلوس دي حشتري بيها خمسين بيضة وأحطهم في الفقاسة يطلعولي كتاكيت
تكبر وتصبح دجاجا يبيض بدوره بيضا كثيرا وأبيع هذا البيض	يكبروا ويبقوا فراخ تبيض كتير وأبيع البيض ده
وهكذا سوف يصبح لدي الكثير من الدجاج أربيه في فناء الدار	وكده حيبقى عندي فراخ كتير أربيها في الحوش
ويكون لحمه لذيذا وأبيعه بثمن مرتفع	ويبقى لحمها طيب وأبيعه بسعر غالي
لكن ماذا سأفعل بالربح الذي سأحققه آه يمكنني أن اشتري عنزة وخروف	بس حعمل إيه بالمكسب اللي حجيبه آه ممكن أشتري عنزة وخروف
لن يكلفني طعامهما كثيرا فالمراعي حولنا والعشب وفير	مش حيكلفوني أكل كتير عشان المراعي حوالينا والعشب كتير
وحينما يكبران أبيعهما واشتري بقرة وعجلها الصغير	ولما يكبروا أبيعهم وأشتري بقرة وعجل صغير
ونشرب من حليب البقرة ما يكفينا واصنع بالباقي زبده وقشطه من التي يحبها أهل المدينة	ونشرب من لبن البقرة اللي يكفينا وأعمل بالباقي زبدة وقشطة من اللي بيحبها أهل المدينة
واستمتع بمنظر البقرة وعجلها وهو يجري ويقفز بين المروج فاجري وراءه واقفز أنا أيضا هكذا	وأتمتع بمنظر البقرة والعجل وهو بيجري وينط في المرج فأجري وراه وأنط أنا كمان كده
وأنا سعيدة ولما قفزت هيا أيضا سقطت قدر الحليب فوق الأرض واختلط بالتراب والطين	وأنا مبسوطة ولما نطت هي كمان وقع قدر اللبن على الأرض واختلط بالتراب والطين
وطبعا لم تكن بهية سعيدة في هذه تلك اللحظة	وطبعا بهية ما كانتش مبسوطة في اللحظة دي
فوداعا إذن للعجل والبقرة والدجاج والبيض والكتاكيت	يبقى باي باي للعجل والبقرة والفراخ والبيض والكتاكيت
وعادت بهية إلى دارها وهي حزينة ودموعها تغرق وجهها بعد أن تبددت ثروتها بطريقة لم تكن تتوقعها	ورجعت بهية بيتها وهي زعلانة ودموعها مغرقة وشها بعد ما ثروتها ضاعت بطريقة ما كانتش متوقعاها
وغضب زوجها وقال لها لا فائدة من البكاء على الحليب المسكوب	وزعل جوزها وقال لها مفيش فايدة من العياط على اللبن المسكوب
ولا على الاستغراق في الأحلام الوردية المستحيلة	ولا على الغرق في الأحلام الوردية المستحيلة
بنهاية الكلام ماذا نستخلص من هذه القصة	في الآخر إيه اللي نتعلمه من القصة دي
ببساطة إنها الأحلام التي تراودنا عن مستقبلنا ونتمنى تحقيقها	ببساطة إنها الأحلام اللي بتراودنا عن مستقبلنا وبنتمنى نحققها
كيف ؟؟؟؟ بالعمل بجد ونشاط واجتهاد	إزاي ؟؟؟؟ بالشغل بجد ونشاط واجتهاد
ومن جد وجد ومن سار على الدرب وصل	واللي يتعب يلاقي واللي يمشي في الطريق يوصل
” Title =” الأصدقاء الأربعه”	” Title =” الأصدقاء الأربعه”
كان لمروان أبٌ كريم يعطف عليه ويرعاه	مروان كان عنده أبو كريم بيحن عليه ويهتم بيه
ولما مات، أصبح مروان يعاني من اليتم والفقر والحرمان	ولما مات، مروان بقى يعاني من اليتم والفقر والحرمان
ولكنه لم ييأس، بل قرر أن يعمل ليكسب قوت يومه	بس ما يئسش، وقرر يشتغل عشان يأكل عيش
وفي طريقه أبصر حماراً نحيلاً	وهو ماشي شاف حمار رفيع
قال له مروان: ما بك أيها الحمار الحزين؟	مروان سأله: مالك يا حمار، ليه زعلان؟
فأجابه الحمار: لقد أصبحت مسناً لا أقدر على العمل، وصاحبي لا يقدم لي ما يكفي من الطعام	الحمار رد عليه: أنا بقيت كبير ومش قادر أشتغل، وصاحبي مش بيديني أكل كفاية
فأشفق عليه مروان، وقال له: هلم بنا إلى الغابة لعلنا نجد هنالك حشيشاً أخضر تتغذى به	مروان حزن عليه، وقاله: تعالى نروح الغابة يمكن نلاقي حشيش أخضر تاكله
وانطلقا معاً إلى الغابة	وراحوا مع بعض على الغابة
وبينما كان مروان يحث الحمار على السير، سمع صوت نباح ضعيف	وبينما مروان بيشجع الحمار يمشي، سمع صوت نباح ضعيف
فالتفت، فوجد كلباً يلهث قرب شجرة يابسة	فلف، ولقى كلب بيلهث جنب شجرة ناشفة
سأله مروان: ما بك أيها الكلب؟	مروان سأله: مالك يا كلب؟
فأجابه الكلب: لقد منعني صاحبي من الطعام، لأنني غدوت عجوزاً لا أقوى على حراسة البيت والغنم	الكلب رد: صاحبي منعني من الأكل، عشان بقيت عجوز ومش قادر أحرس البيت والغنم
فقال مروان: لا تبتئس أيها الكلب العزيز. تعال معنا، لعلني أجد لك شيئاً تأكله	مروان قاله: ما تزعلش يا كلب. تعالى معانا، يمكن ألاقيلك حاجة تاكلها
وتابع الجميع طريقهم نحو الغابة	وكملوا كلهم طريقهم للغابة
وسمع مروان صوت قطٍ يموء، فسأله عن حاله	مروان سمع صوت قطة بتنونو، فسألها عن حالها
فأجابه القط: كنت أعيش في منزل، أصيد الفئران وأقتل الحشرات، فطردني أصحابه لما رأوا كبري وعجزي	القطة ردت: كنت عايشة في بيت، باصطاد الفيران وباقتل الحشرات، فطردوني أصحابه لما شافوا إني كبرت وعجزت
ولما وصل الجميع إلى الغابة، ناموا متعبين	ولما وصلوا كلهم الغابة، ناموا تعبانين
إلا أن الكلب استيقظ على صوتٍ ينبعث من الغابة	بس الكلب صحي على صوت جاي من الغابة
فقفز إلى رفاقه يوقظهم من النوم	فنط على صحابه يصحيهم
وحين علم الجميع بالخبر، صعد القط شجرة عالية، ونظر	ولما عرفوا كلهم الخبر، القطة طلعت شجرة عالية، وبصت
فقال لأصحابه: أرى منزلاً في الغابة فيه نور، ومنه تنبعث الأصوات	وقالت لصحابها: شايفة بيت في الغابة فيه نور، ومنه بتطلع الأصوات
كان المنزل لرجل عجوز أتعبه المرض فنام	البيت كان بتاع راجل عجوز المرض تعبه فنام
وثب الكلب على ظهر الحمار وقال: أرى جماعة من الرجال الأشرار يقتسمون أكواماً من الذهب	الكلب نط على ضهر الحمار وقال: شايف شوية رجالة أشرار بيقسموا كوم دهب
فأخذ الحمار ينهق، والكلب ينبح، والقط يموء، ومروان يصيح	فالحمار قعد ينهق، والكلب ينبح، والقطة تنونو، ومروان يصرخ
فما كان من الأشرار إلا أن تركوا الذهب، وهربوا خائفين	فالأشرار سابوا الدهب، وجريوا خايفين
وهكذا دخل الجميع المنزل، وأعادوا للعجوز ثروته	وكده دخلوا كلهم البيت، ورجعوا للعجوز ثروته
ففرح بهم وشكرهم ووهب القصر وأكوام الذهب للأصدقاء الأربعة	ففرح بيهم وشكرهم وإدى القصر وكوم الدهب للأربع أصحاب
فعاشوا جميعاً برفقة العجوز هانئين مسرورين	فعاشوا كلهم مع العجوز مبسوطين وفرحانين
Title =”قصة رحلة في بطن الحوت”	Title =”قصة رحلة في بطن الحوت”
عمرو: انظر يا جدي إلى هذا الحوت الضخم!	عمرو: بص يا جدو على الحوت الكبير ده!
الجد: سبحان الله! إنه الحوت الأزرق، وهو أكبر حيوان على وجه الأرض يا عمرو.	الجد: سبحان الله! ده الحوت الأزرق، وهو أكبر حيوان على وش الأرض يا عمرو.
عمرو: أتمنى رؤية هذا الحوت حقيقة وليس من خلال «التلفاز» فقط.	عمرو: نفسي أشوف الحوت ده حقيقي مش بس في التليفزيون.
الجد: ألا تخشى أن يبتلعك كما فعل مع سيدنا يونس عليه السلام؟	الجد: مش خايف يبلعك زي ما عمل مع سيدنا يونس عليه السلام؟
عمرو: إذن مات سيدنا يونس في بطن الحوت؟!	عمرو: يعني سيدنا يونس مات في بطن الحوت؟!
الجد: لم يمت، لأن الله أمر الحوت أن يبتلعه دون أكله.	الجد: لأ، ما ماتش، عشان ربنا أمر الحوت يبلعه من غير ما ياكله.
عمرو: وكيف ابتلعه؟	عمرو: وازاي بلعه؟
الجد: دعا يونس عليه السلام قومه إلى عبادة الله، لكنهم لم يستجيبوا وأتعبوه كثيراً، فتركهم غاضباً وتوجه نحو البحر ليسافر.	الجد: سيدنا يونس دعا قومه لعبادة الله، بس مسمعوش كلامه وتعبوه كتير، فسابهم زعلان وراح على البحر عشان يسافر.
عمرو: قصة مثيرة! ماذا بعد؟	عمرو: قصة حلوة! وبعدين إيه حصل؟
الجد: مرّت سفينة كبيرة، فركبها. وعندما صارت السفينة وسط البحر، مالت واضطربت.	الجد: عدت سفينة كبيرة، فركبها. ولما السفينة وصلت وسط البحر، مالت واتهزت.
لمعت عينا عمرو، واقترب من جده وسأل بشوق: وهل غرقت السفينة؟	عيون عمرو لمعت، وقرب من جده وسأل بشغف: والسفينة غرقت؟
الجد: لم تغرق لأن الله لا يريد لها أن تغرق. قرر المسافرون أن يرموا أحدهم في البحر حتى يخفِّفوا من حِمل السفينة؛ فأجرَوْا قرعة لإخراج هذا الشخص ورميه في البحر.	الجد: ما غرقتش عشان ربنا مش عايزها تغرق. المسافرين قرروا يرموا واحد منهم في البحر عشان يخففوا حمل السفينة، فعملوا قرعة عشان يختاروا الشخص ده ويرموه في البحر.
عمرو: وعلى مَن استقرت القرعة؟	عمرو: والقرعة طلعت على مين؟
الجد: على سيدنا يونس عليه السلام! بل أجروا القرعة أكثر من مرة، لكنها كل مرة تكون على سيدنا يونس!	الجد: على سيدنا يونس عليه السلام! وكمان عملوا القرعة أكتر من مرة، وفي كل مرة بتطلع على سيدنا يونس!
عمرو: وهل رموه في البحر؟	عمرو: ورموه في البحر؟
الجد: نعم، وكان راضياً بقدر الله صابراً.	الجد: أيوة، وكان راضي بقدر ربنا وصابر.
عمرو: آه فهمت، جاء بعد ذلك الحوت وابتلعه.	عمرو: آه فهمت، وبعدين جه الحوت وبلعه.
الجد: صحيح، أمر الله هذا الحوت أن يقوم بذلك.	الجد: صح، ربنا أمر الحوت ده يعمل كده.
عمرو: لماذا يا جدي؟	عمرو: ليه يا جدو؟
الجد: لأن سيدنا يونس غادر قومه دون أن يأمره الله بذلك، فأراد الله أن يعلِّمه درساً في الصبر.. فهو نبي.	الجد: عشان سيدنا يونس ساب قومه من غير ما ربنا يأمره، فربنا عايز يعلمه درس في الصبر.. هو نبي يعني.
أخذ الحوت يتحرك ويسبح ويصعد وينزل، وفي بطنه حيث الظلام الشديد، أحسّ النبيّ بغلطته، فأخذ يستغفر ويدعو الله: «لا إله إلا أنت سبحانك إني كنت من الظالمين»، وظلّ يكرِّرها حتى استجاب الله له، وتاب عنه، فأمر الحوتَ أن يذهب إلى الشاطئ ويُخرج النبي من بطنه.	الحوت بدأ يتحرك ويعوم ويطلع وينزل، وجوه بطنه في الضلمة الشديدة، النبي حس بغلطته، فبدأ يستغفر ويدعي ربنا: «لا إله إلا أنت سبحانك إني كنت من الظالمين»، وفضل يكررها لحد ما ربنا استجاب له، وتاب عليه، فأمر الحوت يروح الشاطئ ويطلع النبي من بطنه.
عمرو: سبحان الله! لم يمت؟!	عمرو: سبحان الله! ما ماتش؟!
الجد: كان ضعيفاً جداً هزيلاً متعباً، فأنبت الله شجرة يقطين أكل سيدنا يونس منها وارتوى. ولما تحسّنت صحته عاد إلى قومه.	الجد: كان ضعيف قوي ونحيف وتعبان، فربنا نبت شجرة يقطين سيدنا يونس أكل منها وشبع. ولما صحته اتحسنت رجع لقومه.
عمرو: كيف وجدهم؟ هل أخبرهم بما حدث له؟ هل سألوه أين كنت؟ هل سخروا منه؟	عمرو: لقاهم إزاي؟ قالهم اللي حصله؟ سألوه كنت فين؟ اتريقوا عليه؟
ضحك الجد وقال: صبراً يا حبيبي، لم يحدث شيئ مما تخيلتَهُ! المفاجأة أنّ سيدنا يونس وجد قومه، وعددهم مئة ألف وأكثر، وجدهم آمنوا بالله جميعاً كما أراد لهم نبيهم يونس عليه السلام.	الجد ضحك وقال: استنى يا حبيبي، مفيش حاجة حصلت من اللي تخيلتها! المفاجأة إن سيدنا يونس لقى قومه، وعددهم مية ألف وأكتر، لقاهم آمنوا بالله كلهم زي ما كان عايز نبيهم يونس عليه السلام.
المؤذِّن يؤذِّن لصلاة العشاء، يقوم الجَد ممسكاً بيد عمرو للوضوء والصلاة، وفي الطريق يخبر عمرو جده ماذا تعلّم من القصة، وكان ما تعلمه كثيراً	المؤذن بيأذن لصلاة العشا، الجد بيقوم ماسك إيد عمرو عشان يتوضوا ويصلوا، وفي الطريق عمرو بيقول لجده إيه اللي اتعلمه من القصة، وكان اتعلم حاجات كتير
Title =”رحلة بالمرعى”	Title =”رحلة بالمرعى”
اتَّفقَت البقرة مع صديقتها النعجة بأن يقوما يوم الغدِ برِحلة تنزُّهيَّة في مناطق المرعى	اتفقت البقرة مع صحبتها النعجة إنهم يعملوا بكرة رحلة فسحة في المراعي
مع شقشقَة النهار، بدأتا رحلتهما فقابَلا الفرس	مع طلوع الشمس، بدأوا رحلتهم وقابلوا الحصان
فسألتهما: إلى أين أنتما ذاهبتان؟!	فسألهم: رايحين فين؟!
فردَّتا بصوت واحد: سنذهب للتنزُّه	فردوا مع بعض: حنروح نتفسح
هل تسمحان لي بأن أصحبَكما؟	ممكن آجي معاكم؟
فابتسمت النعجة، وقالت البقرة: على الرُّحبِ والسَّعَة	فالنعجة ابتسمت، والبقرة قالت: اتفضل طبعاً
فانطلقن في سرور، اقتربن من الترعة التي تشقُّ المرعى بالعَرض	فمشيوا فرحانين، قربوا من الترعة اللي بتقطع المرعى بالعرض
فشربا فشربن وارتوين	فشربوا وارتووا
فنظرت إليهما البقرة: لم تجوعا؟ هل تناولتما غذاء الإفطار قبل خروجكما مِن حظائركما ؟!	فالبقرة بصتلهم: مش جعانين؟ أكلتوا الفطار قبل ما تخرجوا من زرايبكم؟!
فقالت النعجة: فعلاً أنا جائعة جدًّا	فالنعجة قالت: أنا فعلاً جعانة قوي
صاحت الفرس بصهيلها: لا أبدًا، فأنا لم آكلْ شيئًا منذ عصر الأمس عندما أنهيتُ العمل في الإسطبل	الحصان صهل وقال: لأ أبداً، أنا مأكلتش حاجة من عصر إمبارح لما خلصت الشغل في الإسطبل
هيا بنا، هناك في نهاية هذا الطريق المرعى الأخضر المزروع بالبرسيم الحجازي	يلا بينا، هناك في آخر الطريق ده المرعى الأخضر المزروع برسيم حجازي
فصاحت البقرة: ما أحلى البرسيمَ الأخضر الشهي!	فالبقرة صرخت: إيه الحلاوة دي، البرسيم الأخضر اللذيذ!
عندما وصلن لأول المرعى، اتفقن على أن يَظللن بجوار بعضهن البعض	لما وصلوا أول المرعى، اتفقوا إنهم يفضلوا جنب بعض
حتى يأكلن من مكان واحد ولا يُهدرن في أكل البرسيم، أو يُخربن مساحة كبيرة مِن المرعى	عشان ياكلوا من مكان واحد ومايهدروش في أكل البرسيم، أو يخربوا مساحة كبيرة من المرعى
لتركه بصورة جيدة لباقي حيوانات المزرعة	عشان يسيبوه كويس لباقي حيوانات المزرعة
بدأن في الْتِهام البرسيم	بدأوا ياكلوا البرسيم بشراهة
فوقفت النعجة والفرَس تنظران للبقرة وهي تمدُّ لسانها الطويل القوي ذا السطحِ الخَشِن	فالنعجة والحصان وقفوا يبصوا للبقرة وهي بتمد لسانها الطويل القوي اللي سطحه خشن
تمدُّه خارج فمها وتسحب به البرسيم بكميات كبيرة لداخل الفم	بتمده برة بقها وبتسحب بيه البرسيم بكميات كبيرة جوة بقها
فتوقَّفت البقرة عن الأكل، وسألتهما: لماذا لا تأكلان وتَنظران إليَّ هكذا؟!	فالبقرة وقفت عن الأكل، وسألتهم: ليه مش بتاكلوا وبتبصولي كده؟!
فسألتها الفرس: لأنكِ تلتهمين البرسيم بكميات ضخمة وبسُرعة!!	فالحصان سألها: عشان بتاكلي البرسيم بكميات كبيرة قوي وبسرعة!!
آه، هذا صحيح؛ لأني أمتلِك فكَّين قويَّين يتمُّ قفلهما وتقطيع النباتات	آه، ده صح؛ عشان عندي فكين قويين بقفلهم وبقطع النباتات
ثم البل بعد الخلط باللعاب	وبعدين ببلهم بعد ما أخلطهم باللعاب
كما تتميز جميع حيوانات الفصيلة البقرية (Bovidae) بوجود وسادة لحمية في الفك العُلوي	وكمان كل الحيوانات من فصيلة البقر عندها وسادة لحمية في الفك العلوي
وقبل أن تَنتهي البقرة من حديثها، كانت النعَجة تُواصِل أكلَها	وقبل ما البقرة تخلص كلامها، كانت النعجة بتكمل أكل
فوجدتاها تأكل البرسيم من مسافات قريبة جدًّا من الأرض	فلقوها بتاكل البرسيم من مسافات قريبة قوي من الأرض
فقالت الفرس: أكيد النعجة يُمكنها الرعي على مسافات قريبة من الأرض؛ لأن أرجلها قصيرة ورأسها قريبة من الأرض؟!	فالحصان قال: أكيد النعجة تقدر ترعى على مسافات قريبة من الأرض؛ عشان رجليها قصيرة وراسها قريب من الأرض؟!
فردَّت البقرة: هذا غير صحيح، فأنا وأنتِ نستطيع أن نلمس الأرض برأسنا وفمنا، ونلحس الأرض بألسنتنا، هنا شيء آخر غير ذلك!!	فالبقرة ردت: ده مش صح، أنا وانت نقدر نلمس الأرض براسنا وبقنا، ونلحس الأرض بلساننا، هنا حاجة تانية غير كده!!
فرفعت النعجة رأسها تاركةً البرسيم: كلامك صحيح يا بقرتي العزيزة	فالنعجة رفعت راسها وسابت البرسيم: كلامك صح يا بقرتي الغالية
فقد حبا الله الفصيلة الغنمية (Ovidae) بشقٍّ في الشفَة العُليا؛ أي: شفاه مَشقوقة	ربنا إدى فصيلة الغنم شق في الشفة العليا؛ يعني: شفايف مشقوقة
تُمكّنها من الرعي لمسافات قريبة من الأرض، وفي تناول الغذاء، خصوصًا المواد المركزة والنباتات المُقطَّعة	تخليها تقدر ترعى لمسافات قريبة من الأرض، وتاكل، خصوصاً الأكل المركز والنباتات المقطعة
فقالت الفرس: سبحان الله الخالق!	فالحصان قال: سبحان الله الخالق!
فتتميَّز الفصيلة الخيليَّة (Equidae) التي أنتمي إليها - ومنها بالطبع الحمير - بشفاه غليظة	فصيلة الخيل اللي أنا منها - وطبعاً الحمير كمان - عندها شفايف غليظة
نجمع بها المواد الغذائية، خصوصًا الموادَّ المطحونة أو النباتات المقطعة	بنجمع بيها الأكل، خصوصاً الحاجات المطحونة أو النباتات المقطعة
فقاطعتْها البقرة: وهل لديكِ وسادة لحميَّة في الفكِّ العُلوي مثلي؟	فالبقرة قاطعتها: وعندك وسادة لحمية في الفك العلوي زيي؟
لا؛ لديَّ قواطع على الفكِّ السُّفلي والعُلوِي	لأ؛ عندي قواطع على الفك السفلي والعلوي
تُمكِّنني من تقطيع النباتات قبل تناوُلها أثناء الرعْي	تخليني أقدر أقطع النباتات قبل ما آكلها وأنا برعى
الشفاه تَندفع للخَلف فتتمكَّن الأسنان مِن قَطعِ الحشائش قرب قاعدتها	الشفايف بتتحرك للورا عشان الأسنان تقدر تقطع الحشايش من قرب أصلها
Title =”انا النمر”	Title =”انا النمر”
خَرَجَ الأرنَبُ الصغيرُ لأولِ مرةٍ باحِثاً عَنْ طَعَامٍ و شَرابٍ له	الأرنب الصُغَيَّر خرج لأول مرة يدوَّر على أكل وشرب
بعْدَ أنْ استأذنَ منْ أمِّهِ	بعد ما استأذن من أمه
وأثناءَ الطَّرِيقِ قالَ في نفْسِهِ	وفي السكة قال لنفسه
لنْ أنسَى وصيةَ أُمِّي أبداً	مش هنسى وصية ماما أبداً
أن آخذَ حَاجَتي فقط وألا أعْتدي على أحدٍ	آخد اللي محتاجه بس ومعتديش على حد
قطَعَ مَسافةً قَصيرةً في الغَابةِ	مشي شوية في الغابة
أعْجَبتهُ الأشجَارَ والأزْهارَ الجميلَة	عجبته الشجر والزهور الحلوة
فتابَعَ سَيْرَهُ يَتَفَرجُ على الْمَنَاظِرِ الْخلابَةِ	فكمل ماشي يتفرج على المناظر الحلوة
شَعَرَ بالأمَانِ فقطَعَ مسافةً أطولَ	حس بالأمان فمشي مسافة أطول
بالقربِ مِنَ الصُّخُورِ العَاليةِ صَادَفَ مَجْمُوعةَ ثعَالبٍ تَلْعبُ و تَمْرحُ	جنب الصخور العالية لقى مجموعة تعالب بتلعب وبتمرح
اقتَربَ منها بهدوءٍ	قرب منهم بهدوء
فسألَه رئيسُها: مَنْ أنتَ أيُّها القادمُ؟	فسأله رئيسهم: مين إنت يا اللي جاي؟
أجَابَ الأرنبُ الصَّغيرُ مستغرباً: ألا تَعْرفُني ؟!	رد الأرنب الصغير مستغرب: إنت مش عارفني؟!
ردَّ رئيسُ الثعالبِ : كيفَ أعرفُكَ دونَ أنْ أراكَ مِنْ قبلُ ؟!	رد رئيس التعالب: إزاي أعرفك وأنا مشفتكش قبل كده؟!
أجابَ الأرنبُ بثقةٍ : أنا النَّمِرُ	رد الأرنب بثقة: أنا النمر
حَدّقَ فيه رئيسُ الثَّعالبِ بحذرٍ، ثم ابْتعدَ عنْه قليلاً	رئيس التعالب بص له كويس، وبعد عنه شوية
فكّرَ في نفسِهِ ، وقالَ : لو لمْ يَكنْ بالفعلِ النمرُ الشجاعُ لما تَجرَأََ وحضَرَ إلى مَجْمُوعتِنا الكَبيرةِ متحدِياً قُوتنا	فكر في نفسه، وقال: لو مكانش هو النمر الشجاع بجد، مكانش اتجرأ وجه لمجموعتنا الكبيرة وهو بيتحدى قوتنا
اقتربَ رئيسُ الثعالبِ من البَقيةِ ، و أخبَرَهم بالخطرِ المحدقِ بهم	رئيس التعالب قرب من الباقيين، وقال لهم عن الخطر اللي محاصرهم
وطَلبَ منْهم الهروبَ مباشرةً و النجاةَ بأنفسِهم مِنْ هَذا الوحشِِ الذي سمعُوا عَنْ قُوتهِ كثيراً	وطلب منهم يهربوا على طول وينجوا بنفسهم من الوحش ده اللي سمعوا عن قوته كتير
ففرُوا هَاربينَ ، ليبقى الأرنبُ وحيداً	فهربوا، وساب الأرنب لوحده
لَعِبَ الأرنَبُ الصَّغيرُ قَلِيلاً ، وتَناوَلَ حاجتَهُ مِنَ الخُضَارِ الْمَوجودِ في الْمَكانِ	الأرنب الصغير لعب شوية، وأكل من الخضار اللي موجود في المكان
ومضَى في الغابةِ يستمتعُ بجمالِها	وكمل في الغابة يستمتع بجمالها
بَعْدَ أنْ قَطَعَ مَسَافةً قَصِيرةً ، صَادَفَ مَجمُوعةَ غزْلانٍ تستريحُ بالْقربِ مِنَ الْبُحيرةِ	بعد ما مشي شوية، لقى مجموعة غزلان بترتاح جنب البحيرة
اقتَربَ منْها بهدوءٍ وشجاعةٍ	قرب منهم بهدوء وشجاعة
تفاجأتْ به ، فهَبَّ رَئِيسُهم وسألَهُ : مَنْ أنتَ أيها القادمُ إلى وَاحةِ الغُزلانِ ؟	اتفاجئوا بيه، فقام رئيسهم وسأله: مين إنت يا اللي جاي لواحة الغزلان؟
أجَابَ الأرنبُ بثقةٍ: أنا النمرُ	رد الأرنب بثقة: أنا النمر
خَافَ الرَّئيسُ ، ابتَعدَ عنْه ، وأخْبرَ الْبقيةَ بأمرِ هذا الوحشِِ الكاسرِ	الرئيس خاف، بعد عنه، وقال للباقيين عن الوحش الكاسر ده
وطلبَ منْهم النجاةَ بأنفسِهم، فهربوا	وطلب منهم ينجوا بنفسهم، فهربوا
ليجدَ الأرنبُ الصغيرُ نفسَهُ مرَّةً أخْرَى وحيداً	فلقى الأرنب الصغير نفسه تاني لوحده
استراحَ قليلاً في الْواحةِ ، ومضَى	ارتاح شوية في الواحة، وكمل
صَادفَ في طريقِ عَودتِهِ إلى مَنزلِه وحشاً كبيراً	في طريق رجوعه للبيت قابل وحش كبير
مَرَّ بجَانبِهِ ، سلّمَ عليه بهدُوءٍ واطمئنان ٍ, وتابعَ سَيْرَهُ	عدّى جنبه، سلم عليه بهدوء واطمئنان، وكمل ماشي
استَغربَ الوحشُ تصرفَهُ ، وعدمَ الخوفِ منه	الوحش استغرب تصرفه، وإنه مخافش منه
وقالَ في نفسِهِ: لمَاذا لمْ يخفْ منِي ؟!	وقال لنفسه: ليه مخافش مني؟!
أسْرعَ الْوَحشُ ولَحِقَ بهِ ، استَعَدَ لضربِهِ مباشرةً	الوحش جرى ولحقه، واستعد يضربه على طول
لكنهُ انتظرَ ، وفَكرَ : أريدُ معرفةَ سِرَّ شجاعتهِ	لكنه استنى، وفكر: عايز أعرف سر شجاعته
اقتَربَ منهُ ، وطَلَبَ أن يتَوقْف	قرب منه، وطلب منه يوقف
فوقَفَ ، ونَظَرَ إلى الْوحشِ الكاسِرِ باحتِرامٍ	فوقف، وبص للوحش الكاسر باحترام
وسألَهُ ماذا يُرِيدُ منه ، ولماذا لَحِقَ بهِ	وسأله عايز إيه منه، وليه لحقه
لم يُجبْهُ الْوحشُ الْكَاسِرُ، وسألهُ غاضباً: مَنْ أنتَ أيُّها المسكينُ؟	الوحش الكاسر مردش عليه، وسأله بغضب: مين إنت يا مسكين؟
نَظرَ إليه الأرنبُ الْصَّغِيرُ باعتزازٍ	الأرنب الصغير بص له بفخر
معتقداً أنه سيهربُ منه كما هربتْ الثعالبُ و الْغزلانُ دونَ أنْ يُفكرَ بالسََّببِ	فاكر إنه هيهرب منه زي ما التعالب والغزلان هربوا من غير ما يفكر في السبب
وأجابَ: أنا النمرُ	ورد: أنا النمر
ضَحِكَ الوحّشُ سَاخِراً ، وسَألَ منْ جَدِيد: هلْ تَعرفُنيْ أيُّها الصغيرُ؟	الوحش ضحك بسخرية، وسأل تاني: إنت تعرفني يا صغير؟
لا أعرفُ أحداً في هذه الغابةِ	معرفش حد في الغابة دي
سألَ الوحشُ: ألا تعرِفُ مَنْ هو النَّمِرُ؟	الوحش سأل: إنت متعرفش مين هو النمر؟
ردَّ الأرنبُ الصَّغِيرُ بثقةٍ: أنا ، أنا النمرُ	الأرنب الصغير رد بثقة: أنا، أنا النمر
استغربَ الوحشُ ثِقتَه الزَّائدةِ ، وسألَهُ: مَنْ قالَ لكَ ذلكَ؟	الوحش استغرب ثقته الزيادة، وسأله: مين قال لك كده؟
أجابَ الأرنبُ الصَّغِيرُ: أُمِّي، أُمِّي هي التي قالتْ لِي	الأرنب الصغير رد: ماما، ماما هي اللي قالت لي
وطلَبتْ مني أنْ أحترمَ الآخرين	وطلبت مني أحترم الآخرين
هزَّ الْوحشُ رأسَهُ ، وقالَ: هيّا معي إلى أُمِّكَ	الوحش هز راسه، وقال: يلا معايا لأمك
ذهَبا إلى بيتِ الأرنبِ ، وعندمَا وصََلا ارتعبَتْ الأُمُّ	راحوا لبيت الأرنب، ولما وصلوا الأم اترعبت
وقالتْ في نفسِها: لقد جَلَبَ لي ابني معَه الهلاكَ	وقالت لنفسها: ابني جاب لي الهلاك معاه
Title =”الــــلـــــه رقيب”	Title =”الــــلـــــه رقيب”
ذات يوم كان يسير فى الصحراء فرأى غلاما صغير السن يرعى الغنم لسيده	في يوم من الأيام كان ماشي في الصحرا، فشاف ولد صغير بيرعى الغنم لصاحبه
فأراد أن يختبره	فحب يختبره
فقال له : بع لى هذه الشاة واسقنى لبنها	فقاله: بيعلي الخروفة دي واسقيني لبنها
فقال الغلام : إنى أرعاها لسيدى فماذا أقول له ؟	فقاله الولد: أنا برعاها لصاحبي، حقوله إيه؟
قال عمر رضى الله عنه : إن سيدك لا يراك فقل له : أكلها الذئب	قال عمر رضي الله عنه: صاحبك مش شايفك، قوله: الديب كلها
فقال الغلام : وأين الله يا سيدى؟	فقال الولد: وفين ربنا يا سيدي؟
فاندهش الصحابى الجليل من ذلك الغلام الذى يستشعر مراقبة الله	فاندهش الصحابي الجليل من الولد اللي حاسس إن ربنا مراقبه
فبكى متأثرا وذهب وراء الغلام حتى يعرف دار سيده	فبكى من التأثر وراح ورا الولد عشان يعرف بيت صاحبه
وطرق الباب ثم اشترى ذلك الغلام من سيده وأعتقه (حرره)	وخبط على الباب وبعدين اشترى الولد ده من صاحبه وحرره
قائلا له : إن خوفك من الله هو الذى أعتقك	وقاله: خوفك من ربنا هو اللي حررك
وانتهت قصتى طفلى الحبيب بأجمل معنى	وكده خلصت حكايتي يا حبيبي بأحلى معنى
وهو أن الله يراك فى كل مكان ليحفظك ويرعاك لأنه يحبك	وهو إن ربنا شايفك في كل مكان عشان يحافظ عليك ويرعاك علشان بيحبك
الله يرى ما تفعل فافعل أشياء يحبها الله	ربنا شايف اللي بتعمله، فاعمل حاجات ربنا بيحبها
Title =”الله يراني”	Title =”الله يراني”
كان هناك فتى ذكي وسريع البديهة اسمه(أحمد)وكان يعيش في قرية	كان فيه ولد شاطر وسريع الفهم اسمه (أحمد) وكان عايش في قرية
وفي يوم جاء شيخ من غربي المدينة ليسأل عنه	وفي يوم جه شيخ من غرب المدينة عشان يسأل عليه
فسأل أحد الرجال عنه	فسأل واحد من الرجالة عليه
الشيخ:هل يعيش في هذه القرية فتى أسمه أحمد؟	الشيخ: هو فيه ولد اسمه أحمد عايش في القرية دي؟
الرجل:نعم,يا سيدي	الراجل: أيوة يا سيدنا
الشيخ:وأين هو الآن؟	الشيخ: وهو فين دلوقتي؟
الرجل:لابد أنه في الكتاب وسوف يمر من هنا	الراجل: أكيد في الكُتّاب وحيعدي من هنا
الشيخ:ومتى سوف يرجع؟	الشيخ: وحيرجع إمتى؟
الرجل:لا أعرف،ولكن لماذا تسأل عنه؟ولماذا جلبت معك هؤلاء الفتيان؟	الراجل: معرفش، بس ليه بتسأل عليه؟ وليه جايب معاك الصبيان دول؟
الشيخ:سوف ترى قريبا	الشيخ: حتشوف قريب
كان الشيخ قد أحضر معه ثلاث فتيان من غربي المدينة و4تفاحات ،الشيخ يريد أن يختبر ذكاء أحمد	الشيخ كان جايب معاه تلات صبيان من غرب المدينة و4 تفاحات، الشيخ عايز يختبر ذكاء أحمد
ومرت دقائق ومر أحمد من أمام الشيخ	وعدت دقايق وأحمد عدى من قدام الشيخ
الشيخ:يا أحمد يا أحمد	الشيخ: يا أحمد يا أحمد
أحمد:نعم يا سيدي	أحمد: أيوة يا سيدي
الشيخ:هل انتهيت من الدرس؟	الشيخ: خلصت الدرس؟
أحمد:نعم،ولكن لماذا تسأل يا سيدي؟	أحمد: أيوة، بس ليه بتسأل يا سيدي؟
الشيخ:خذ هذه التفاحة وأذهب وأبحث عن مكان لا يراك فيه أحد وقم بأكل التفاحة	الشيخ: خد التفاحة دي وروح دور على مكان محدش يشوفك فيه وكل التفاحة
قام الشيخ بتوزيع باقي التفاح على الفتيان	الشيخ وزع باقي التفاح على الصبيان
وبعد عدة دقائق رجع الفتيان ولم يكن أحمد بينهم	وبعد كام دقيقة رجعوا الصبيان وأحمد مكنش معاهم
الشيخ:هل أكلتم التفاح؟	الشيخ: كلتوا التفاح؟
قال الثلاثة معا:نعم،يا سيدي	التلاتة قالوا مع بعض: أيوة يا سيدي
الشيخ:حسنا،أأخبروني أين أكلتم التفاح؟	الشيخ: طيب، قولولي كلتوا التفاح فين؟
الأول:أنا أكلتها في الصحراء	الأول: أنا كلتها في الصحرا
الثاني:أنا أكلتها في سطح بيتنا	التاني: أنا كلتها فوق السطوح
الثالث:أنا أكلتها في غرفتي	التالت: أنا كلتها في أوضتي
ومرت دقائق وسأل الشيخ نفسه:أين هو أحمد يا ترى؟أما زال يبحث عن مكان؟	وعدت دقايق والشيخ سأل نفسه: ترى أحمد فين؟ لسه بيدور على مكان؟
فجاه رجع أحمد وفي يده التفاحة؟	وفجأة رجع أحمد والتفاحة في إيده
الشيخ:لماذا لم تأكل التفاحة؟	الشيخ: ليه مكلتش التفاحة؟
أحمد:لم أجد مكانا لا يراني فيه أحد؟	أحمد: ملقيتش مكان محدش يشوفني فيه
الشيخ:ولماذا؟	الشيخ: وليه؟
أحمد:لآن الله يراني أينما أذهب	أحمد: عشان ربنا شايفني في أي مكان أروحه
ربت الشيخ على كتف أحمد وهو معجب بذكائه	الشيخ ربت على كتف أحمد وهو معجب بذكاه
Title =”حكاية بدندر”	Title =”حكاية بدندر”
كان في قديم الزمان راعي غنم يعيش من خيرها.	كان زمان راجل راعي غنم عايش من خيرها.
قال لزوجته ذات يوم: ضجرت من هذه الشغلة. أريد أن أفتش عن غيرها.	قال لمراته يوم: زهقت م الشغلانة دي. عايز أدوّر على حاجة تانية.
حاولت زوجته أن تغّير رأيه، لكنها لم تنجح.	مراته حاولت تغيّر رأيه، بس ماعرفتش.
فباع غنمه بأربعين ليرة ذهبا.	فباع الغنم بتاعته بأربعين جنيه دهب.
وقرر الذهاب إلى بغداد ليبحث فيها عن عمل.	وقرر يروح بغداد يدوّر فيها على شغل.
وفي الطريق كان يسأل من يقابله عن بغداد.	وفي السكة كان بيسأل اللي يقابله عن بغداد.
رآه رجل بغدادي محتال فسأله: ماذا تريد من بغداد؟	شافه راجل نصاب من بغداد وسأله: عايز إيه من بغداد؟
حكى له الراعي قصته، ففكر البغدادي مع نفسه، وقال: هذا غبي… سأحتال عليه وآخذ فلوسه.	الراعي حكاله قصته، فالراجل البغدادي فكر في نفسه وقال: ده غشيم... حنصب عليه وآخد فلوسه.
ثم قال للراعي: أنا بغداد… أطلب ما تريد…أنت الآن تعبان. تعال إلى البيت لترتاح.	وبعدين قال للراعي: أنا بغداد... اطلب اللي انت عايزه... انت دلوقتي تعبان. تعالى البيت ترتاح.
فرح الريفي ودعا للرجل بأن يحفظه الله، وذهب معه إلى داره.	الريفي فرح ودعاله ربنا يحفظه، وراح معاه بيته.
وجلس الاثنان يستريحان في غرفة.	وقعدوا الاتنين يرتاحوا في أوضة.
وذهب البغدادي بعد ذلك إلى زوجته وقال لها: جلبت لك صيدا سمينا.	وبعدها راح البغدادي لمراته وقالها: جبتلك صيد سمين.
أحضري سطلا واربطيه بحبل.. وسأجلس أنا والراعي على السطح، وبين فترة وأخرى أنزلي السطل فأقول أني أريد حاجة، فتضعين الحاجة التي أطلبها في السطل وأرفعه أنا.	هاتي جردل واربطيه بحبل.. وأنا حقعد أنا والراعي على السطح، وكل شوية نزلي الجردل وأنا حقول عايز حاجة، تحطي الحاجة اللي بطلبها في الجردل وأنا حرفعه.
وتفاهم معها على الحاجات التي سيطلبها.	واتفق معاها على الحاجات اللي حيطلبها.
جلس البغدادي المحتال مع الراعي فوق السطح يتحدثان، ثم قال البغدادي: "سنتعشى الآن.. اغسل يديك ووجهك قبل العشاء."	قعد البغدادي النصاب مع الراعي فوق السطح يتكلموا، وبعدين قال البغدادي: "حنتعشى دلوقتي.. اغسل إيديك ووشك قبل العشا."
ثم أنزل السطل من السطح، وقال: "يا سطل … أجلب لنا ماء للغسيل."	وبعدين نزل الجردل من السطح، وقال: "يا جردل... هاتلنا مية نغسل."
وبعد برهة رفع السطل وهو مملوء بالماء، فاغتسل الراعي.	وبعد شوية رفع الجردل وهو مليان مية، فالراعي غسل.
ثم أنزل المحتال السطل وقال: "يا سطل … إجلب لنا العشاء".	وبعدين النصاب نزل الجردل وقال: "يا جردل... هاتلنا العشا".
وسحب السطل، فكان مليئا بما لذ وطاب.	وشد الجردل، فكان مليان بأحلى الأكل.
أخذ الراعي يأكل، وهو مستغرب وحائر من أمر هذا السطل العجيب،	الراعي قعد ياكل، وهو مستغرب ومش فاهم حكاية الجردل العجيب ده،
ورجا البغدادي أن يبيعه إياه مقابل الأربعين ليرة التي معه.	وطلب من البغدادي يبيعهوله بالأربعين جنيه اللي معاه.
فقال البغدادي: "يبدو لي أنك رجل طيّب وابن حلال.. سأبيعك السطل … وحاذر أن يأخذه أحد منك. إنه سطل لا مثيل له"..	فالبغدادي قال: "باين عليك راجل طيب وابن حلال.. حبيعلك الجردل... وخلي بالك محدش ياخده منك. ده جردل مالوش حل"..
شكر الراعي المحتال، وأعطاه ما معه من الليرات، وعاد إلى أهله سعيداً بالسطل.	الراعي شكر النصاب، وإداله الفلوس اللي معاه، ورجع لأهله فرحان بالجردل.
وفي المساء، دعا جيرانه وأصدقاءه وجلسوا جميعا فوق سطح الدار.	وبالليل، عزم جيرانه وصحابه وقعدوا كلهم فوق سطح البيت.
وبعد فترة أنزل السطل، وصاح: "قهوة… قهوة." ثم رفع السطل فإذا هو فارغ..	وبعد شوية نزل الجردل، وزعق: "قهوة... قهوة." وبعدين رفع الجردل ولقاه فاضي..
ثمّ أنزله ثانية، وطلب شايا، لكنه رجع فارغا.	وبعدين نزله تاني، وطلب شاي، بس رجع فاضي.
وهكذا تكرر الأمر عدّة مرات والسطل يعود فارغا.	وكده الموضوع اتكرر كذا مرة والجردل بيرجع فاضي.
فجلس الراعي يبكي على فلوسه.	فقعد الراعي يعيط على فلوسه.
وفي فجر اليوم التالي، ذهب يفتش على بغداد الذي احتال عليه،	وفي الصبح بدري، راح يدور على بغداد اللي نصب عليه،
ودخل مدينة بغداد، وهو يصيح: "من يدلني على بغداد"؟	ودخل مدينة بغداد، وهو بيزعق: "مين يدلني على بغداد"؟
التقت به امرأة عجوز فسألته: "ماذا تريد من بغداد"؟	قابلته ست عجوزة فسألته: "عايز إيه من بغداد"؟
حكى لها الراعي حكايته.	الراعي حكالها حكايته.
فقالت له: أنا أستطيع أن أمسكه لك وأعيد إليك ليراتك،	فقالتله: أنا أقدر أمسكهولك وأرجعلك فلوسك،
ولكن بشرط أن تقول لكل من يكلمك أو يسألك "بدندر".	بس بشرط تقول لكل اللي يكلمك أو يسألك "بدندر".
وافق الراعي وذهب معها.	الراعي وافق وراح معاها.
أخذته إلى الحلاق، فحلق له شعره، واشترت له بدلة جندي،	خدته للحلاق، فحلقله شعره، واشترتله بدلة عسكري،
ثمّ ذهبت معه إلى صاحب أكبر محل بيع أقمشة في بغداد	وبعدين راحت معاه لصاحب أكبر محل قماش في بغداد
وقالت له: "بعثتني سيدتي زوجة الوالي لكي آخذ منك أحسن الأقمشة وأجملها".	وقالتله: "ستي مرات الوالي بعتتني آخد منك أحسن وأجمل القماش".
فرح بائع الأقمشة واختار لها أحسن وأغلى ما عنده	بتاع القماش فرح واختارلها أحسن وأغلى حاجة عنده
فقالت له: "سأريها لسيدتي وسيبقى هذا الجندي هنا حتى أعود".	فقالتله: "حوريها لستي والعسكري ده حيفضل هنا لحد ما أرجع".
ذهبت المرأة، ومضت ساعات وساعات ولم تعد.	الست راحت، وعدت ساعات وساعات ومرجعتش.
فأمسك صاحب القماش بالراعي وسأله عن المرأة، فقال: "بدندر… بدندر".	فصاحب القماش مسك الراعي وسأله عن الست، فقال: "بدندر... بدندر".
أخذ بائع القماش الراعي إلى الشرطة.	بتاع القماش خد الراعي على القسم.
وهناك حكى قصته للشرطي الذي رقّ له قلبه، فأخذه إلى الوالي.	وهناك حكى قصته للظابط اللي قلبه حن عليه، فخده للوالي.
حزن الوالي عليه، وأعطاه أربعين ليرة ذهبا،	الوالي زعل عليه، وإداله أربعين جنيه دهب،
وأعطى بائع الأقمشة ثمن أقمشته.	وإدى بتاع القماش تمن القماش بتاعه.
وذهب كل منهما إلى سبيله. وعشتم سالمين	وكل واحد راح في حاله. وعشتوا سالمين
Title =” قصة يا أم البطن	Title =” قصة يا أم البطن
عمار: أريد أن أخبرك شيئًا يا أمي، لقد وقع العصير من يدي وانسكب على فِراشي.	عمار: عايز أقولك حاجة يا ماما، العصير وقع من إيدي واتكب على السرير بتاعي.
الأم متأثرة: ولماذا تشرب العصير فوق السرير؟ كم مرة قلت لك: إنّ السرير ليس مكانًا للأكل أو الشرب؟ هداك الله! كيف؟!	الأم متأثرة: وليه بتشرب العصير فوق السرير؟ قولتلك كام مرة إن السرير مش مكان للأكل ولا الشرب؟ يهديك ربنا! إزاي؟!
عمار يضحك ويضحك ويقول: كنت أمزح فقط يا أمي، كنت أمزح!	عمار بيضحك ويقول: كنت بهزر بس يا ماما، كنت بهزر!
الأم غاضبة: هذا ليس مزاحًا يا عمار، هذا كذب!	الأم زعلانة: ده مش هزار يا عمار، ده كدب!
عمار: كذب؟	عمار: كدب؟
الأم: نعم، هل حدث ما أخبرتني به؟	الأم: أيوة، هو حصل اللي قولتهولي؟
عمار: لا، ولكن.	عمار: لأ، بس.
الأم: المسلم يا عمار صادق حتى في مزاحه، اذهب واجلس قليلاً مع كتابك في صحبة رسول الله - صلى الله عليه وسلم.	الأم: المسلم يا عمار صادق حتى في هزاره، روح اقعد شوية مع كتابك في صحبة الرسول - صلى الله عليه وسلم.
غادر عمار، وغاب بعض الوقت، ثم عاد.	عمار مشي، وغاب شوية، وبعدين رجع.
الأم: ما رأيك؟	الأم: إيه رأيك؟
عمار: قرأت أنه -صلى الله عليه وسلم- كان لا يمزح إلا بالصدق، وقد ذهبتْ إليه امرأة عجوز، وطلبت منه أن يدعو الله لها بدخول الجنة، فقال لها رسول الله -صلى الله عليه وسلم-: ((إن الجنة لا تدخلها عجوز))، فذهبت المرأة تبكي، فضحك رسول الله -صلى الله عليه وسلم- وأرسل مَن يُخبرها: أخبِروها أنها ستصبح شابة ثم تدخل الجنة، لهذا لن تدخل الجنة وهي عجوز.	عمار: قريت إنه -صلى الله عليه وسلم- كان مابيهزرش إلا بالصدق، وراحتله ست عجوزة، وطلبت منه يدعيلها تدخل الجنة، فقالها الرسول -صلى الله عليه وسلم-: ((الجنة مابتدخلهاش عجوزة))، فالست راحت تعيط، فضحك الرسول -صلى الله عليه وسلم- وبعت حد يقولها: قولولها إنها حتبقى شابة وبعدين تدخل الجنة، عشان كده مش حتدخل الجنة وهي عجوزة.
ومرة قالت له امرأة: إن زوجي يريدك، فأراد -صلى الله عليه وسلم- أن يمازحها، فقال لها: أهو الذي بعينه بياض؟ قالت: لا، ليس بعينه بياض، فقال -صلى الله عليه وسلم-: ((بل بعينه بياض))، قالت المرأة: لا والله، فقال لها رسول الله -صلى الله عليه وسلم- مبتسمًا: ما من أحد إلا وفي عينه بياض.	ومرة واحدة ست قالتله: جوزي عايزك، فحب -صلى الله عليه وسلم- يهزر معاها، فقالها: هو اللي في عينه بياض؟ قالت: لأ، مفيش بياض في عينه، فقال -صلى الله عليه وسلم-: ((لأ في عينه بياض))، الست قالت: لا والله، فقالها الرسول -صلى الله عليه وسلم- وهو مبتسم: مفيش حد إلا وفي عينه بياض.
قال عمار: هل فهمت اللغز يا أمي؟	عمار قال: فهمتي اللغز يا ماما؟
قالت الأم: طبعًا، كل الناس لون أحداقها أبيض.	الأم قالت: طبعاً، كل الناس لون بياض عينيهم أبيض.
قال عمار: ذكية أنت يا أمَّ البطن!	عمار قال: شاطرة انتي يا أم الكرش!
الأم: أنا يا عمار؟	الأم: أنا يا عمار؟
عمار: أمزح يا أمي، كل الناس لها بطون!	عمار: بهزر يا ماما، كل الناس عندها بطون!
Title =” قصة القطة البيضاء والجار الشرس”	Title =” قصة القطة البيضاء والجار الشرس”
لولو" قطة بيضاء جميلة، في يوم من الأيام ذهبت لكي تشرب من عند الجار، وكان الجو شديد الحرارة	لولو كانت قطة بيضة حلوة، ويوم من الأيام راحت تشرب من عند الجار، والجو كان حر جدا
رفض الجار أن تشربالقطة الصغيرة، وأغلَق الباب، احتارت القطة من أين تشرب؟	الجار رفض يخلي القطة الصغيرة تشرب، وقفل الباب. القطة احتارت هتشرب منين؟
قالت لولو: سوف أذهب إلى صديقي الأعمى علاء؛ فهو طفل طيب القلب وسوف يسقيني	لولو قالت: هروح لصاحبي الأعمى علاء، هو ولد طيب وهيسقيني
فذهبتْ إليه، وقالت: يا علاء، أنا (عطشانة) جدًّا، أرجوك أعطني كوبًا من الماء	راحتله وقالتله: يا علاء، أنا عطشانة أوي، من فضلك إديني كباية مية
قال علاء: قطتي الجميلة، ادخلي، عندي ماء ولبن (تفضلي اشربي)	علاء قال: يا قطتي الحلوة، ادخلي، عندي مية ولبن اتفضلي اشربي
شكرًا يا علاء، يا رب أنت قادر، اشفِ علاء من مرضه، واهدِ يا رب الجار الشرير	شكرا يا علاء، يا رب انت قادر، اشفي علاء من مرضه، واهدي يا رب الجار الشرير
فاستجاب الله للقطة الضعيفة، وبعد ثلاثة أيام رجع بصرُ علاء، وأصبح سعيدًا جدًّا	ربنا استجاب للقطة الضعيفة، وبعد تلات أيام علاء رجعله نظره، وبقى مبسوط أوي
أما الجار، فكانت زوجته حاملاً ووضعت طفلاً جميلاً جدًّا اسمه يوسف	أما الجار، فمراته كانت حامل وولدت ولد حلو أوي اسمه يوسف
ذهبت لولو إلى الجار الشرس، وقالت له: أريد ماء	لولو راحت للجار الشرس، وقالتله: عايزة مية
قال لها: لا لا لا، ولا ترجعي هنا أبدًا، وضرَبَها بحجر صغير	قالها: لأ لأ لأ، وما ترجعيش هنا تاني خالص، وضربها بحجر صغير
تألَّمت القطة جدًّا، وقالت: يا رب، أنا لا أحبُّ أن أدعو بشرٍّ على هذا الجار، ولكن أنا أدعو له أن يكون رجلاً طيبًا، وأن يَرفُق بالحيوانات الضعيفة مِثلي	القطة اتألمت جدا، وقالت: يا رب، أنا مش عايزة أدعي بالشر على الجار ده، بس أنا بدعيله إنه يبقى راجل طيب، ويرحم الحيوانات الضعيفة زيي
وبعد ثلاث سنوات ذهب يوسف مع أبيه في رحلة صيد، ونام يوسف بجوار أبيه	وبعد تلات سنين يوسف راح مع أبوه رحلة صيد، ونام يوسف جنب أبوه
وفي الظلام جاء نمر كبير جدًّا، وجرَّ يوسف من قدميه بدون أن يُحِس أبوه	وفي الضلمة جه نمر كبير أوي، وجر يوسف من رجليه من غير ما أبوه يحس
ولكن الأب انتبه، وقال: يا رب، ابني سوف يَموت، النمر سوف يأكله، أنا أعلم أني رجل لا أصلِّي ولا أصوم، ولكن أنت رحيم، أدعوك أن يأكلني النمر بدلاً من ابني؛ فهو صغير	بس الأب انتبه، وقال: يا رب، ابني هيموت، النمر هياكله، أنا عارف إني راجل مش بصلي ولا بصوم، بس انت رحيم، بدعيك إن النمر ياكلني بدل ابني؛ هو لسه صغير
قال له النمر: أنا لن آكل الصغير، ولكن سوف آخذه أمانةً عندي؛ حتى ترفُق بالحيوانات الضعيفة، ولا تسبِّب لهم أذى	النمر قاله: أنا مش هاكل الصغير، بس هاخده أمانة عندي؛ لحد ما ترحم الحيوانات الضعيفة، وما تأذيهمش
قال الجار: إذا (أرجعت) لي ابني الآن، سوف أرفُق بالحيوانات التي في الغابة	الجار قال: لو رجعتلي ابني دلوقتي، هرحم الحيوانات اللي في الغابة
قال النمرُ: لا، سوف آخذه عندي ثلاثة أيام، وهرب النمر بعيدًا ومعه يوسف	النمر قال: لأ، هاخده عندي تلات أيام، وجري النمر بعيد ومعاه يوسف
ورجع الجار إلى بيته حزينًا بدون ابنه، وبعد مرور يومين جاءت القطة لولو، وطلبت منه أن تشرب بعضًا من الماء	والجار رجع بيته زعلان من غير ابنه، وبعد يومين جت القطة لولو، وطلبت منه تشرب شوية مية
ورفَض الجار طلَبَ القطة، وبعد مرور يوم جاء النمر إلى الجار ومعه يوسف، وكان مريضًا جدًّا	والجار رفض طلب القطة، وبعد يوم جه النمر للجار ومعاه يوسف، وكان عيان جدا
قال الجار: كيف مَرِض يوسف؟	الجار قال: إزاي يوسف عيان؟
قال النمر: يوسف رفَض الأكل، وكان عطشان جدًّا، وكلما أعطيتُه الماء، كان الماء يَجِفُّ قبل أن يصل إلى فمه، ولا أعرف لماذا	النمر قال: يوسف رفض ياكل، وكان عطشان جدا، وكل ما أديله مية، المية كانت بتنشف قبل ما توصل لبقه، ومش عارف ليه
أسرَع الجار إلى الماء، وجاء لابنه بماء كثير حتى يشرب، ولكن كان الماء يَجِف قبل أن يصل إلى فمه	الجار جري على المية، وجاب لابنه مية كتير عشان يشرب، بس المية كانت بتنشف قبل ما توصل لبقه
وهنا تذكَّر الجار أنه أغضب الله ومنَع الماء عن الحيوانات، وهنا ندِم الجار	وهنا الجار افتكر إنه زعل ربنا ومنع المية عن الحيوانات، وهنا الجار ندم
وقال: يا رب، سوف أضع كل يوم الماء في وعاء كبيرٍ أمام البيت؛ حتى تشربَ منه الطيور والحيوانات	وقال: يا رب، هحط كل يوم مية في طبق كبير قدام البيت؛ عشان العصافير والحيوانات تشرب منه
وقام الجار ووضع إناء كبيرًا فيه ماء أمام بيته؛ حتى تشرب الحيوانات	والجار قام وحط طبق كبير فيه مية قدام بيته؛ عشان الحيوانات تشرب
وهنا استجاب الله وشرِب يوسف الصغير من الماء، وأصبح قويًّا	وهنا ربنا استجاب ويوسف الصغير شرب من المية، وبقى قوي
ودعتِ الطيور والحيوانات لهذا الجار بالسعادةِ في الدنيا والآخرة	والعصافير والحيوانات دعت للجار ده بالسعادة في الدنيا والآخرة
Title =”قصة إلى مصر من جديد”	Title =”قصة إلى مصر من جديد”
دخل عمرو إلى البيت سعيداً، وتوجه مسرعاً نحو جَدّه الذي كان يقرأ القرآن	عمرو دخل البيت فرحان، وراح جري على جده اللي كان بيقرا القرآن
وضع حقيبته عن ظهره، وفتحها متحمساً، وأخرج منها علبة أنيقة	حط الشنطة على الأرض وفتحها بحماس، وطلع منها علبة شيك
وعرضها على جَدِّه، وقال: انظر يا جدي وخمّن لماذا حصلت على هذه الهدية؟	وراها لجده وقاله: "بص يا جدو وخمن ليه خدت الهدية دي؟"
قال الجد: إنها ساعة جميلة يا عمرو، ربما لأنك ولد مهذب في المدرسة	جده قاله: "دي ساعة حلوة يا عمرو، يمكن عشان انت ولد مؤدب في المدرسة"
قال عمرو: لأن لديّ معلومات عن الأنبياء أكثر من جميع الأولاد	عمرو رد: "لأ، عشان أنا عندي معلومات عن الأنبياء أكتر من كل الولاد"
ضحك الجد وقبّل عَمْراً، وقال له: أحسنت يا عمرو	جده ضحك وباسه، وقاله: "برافو عليك يا عمرو"
وأراد أن يقوم لبعض شأنه، فقال له عمرو: إلى أين تذهب يا جدي؟	ولما جده حاول يقوم، عمرو قاله: "رايح فين يا جدو؟"
بما أنني فزت هذه المرة، فإنني أريد أن أفوز كل مرة. اجلس من فضلك لتكمل لي قصة سيدنا موسى، أم أنك نسيت	بما إني كسبت المرة دي، عايز أكسب كل مرة. اقعد بقى وكمل لي حكاية سيدنا موسى، ولا نسيت؟
بعد الغداء، جلس عمرو إلى جوار جده على سريره، وتغطى معه ببطانيته	بعد الغدا، عمرو قعد جنب جده على السرير، واتغطى معاه
ذهب موسى عليه السلام إلى فلسطين. وماذا بعد يا جدي؟ هل وصل؟	موسى راح فلسطين. وبعدين يا جدو؟ وصل؟
الجد: نعم وصل، وكان متعباً خائفاً.. رأى بعض الناس يقفون حول بئر يملؤون أوعيتهم من مائه	الجد: "آه وصل، وكان تعبان وخايف.. شاف ناس واقفين حوالين بير بيملوا مياه"
Title =”انما المؤمنون اخوة”	Title =”انما المؤمنون اخوة”
كان سامي من أكثر الأولاد المشاغبين في المدرسة, فقد كان يظلم الأطفال الصغار ويأخذ طعامهم ويضربهم حتى أصبحت المدرسة كلها تكره سامي وتتقي شره, بالإضافة إلى أنه تلميذ غير نشيط يأتي متأخراً إلى المدرسة ودائماً يتعرض إلى عقاب المعلمة لأنه كسول و مشاغب, وعلى العكس كان أحمد تلميذاً مجتهداً يحفظ دروسه وينهض نشيطاً إلى مدرسته, وقد نال تقدير المعلمة ورفاقه.	سامي كان من أكتر الأولاد المشاغبين في المدرسة، كان بيظلم الأطفال الصغيرين وياخد أكلهم ويضربهم لحد ما بقت المدرسة كلها بتكره سامي وبتخاف من شره، وكمان كان تلميذ غير نشيط بييجي متأخر للمدرسة ودائماً بيتعاقب من المدرسة عشان كسول ومشاغب، وعلى العكس كان أحمد تلميذ مجتهد بيحفظ دروسه وبيصحى نشيط للمدرسة، وأخد تقدير المعلمة وزمايله.
في يوم من الأيام كرمت المعلمة أحمد لأنه نال أعلى الدرجات وأعطته وساماً كي يضعه على صدره لأنه تلميذ نشيط, ففرح أحمد وشكر المعلمة	في يوم من الأيام كرمت المعلمة أحمد عشان جاب أعلى الدرجات وأدته وسام عشان يعلقه على صدره لأنه تلميذ نشيط، أحمد فرح وشكر المعلمة
ولكن سامي لم يسر لما فعلته المعلمة مع أحمد وأعجبه الوسام وقرر أن يأخذه عنوة من أحمد, وعندما كان أحمد عائداً من المدرسة, إذا بسامي يعترض طريقه ويطلب منه أن يعطيه الوسام الذي على صدره	لكن سامي ما اتبسطش لما المعلمة كرمت أحمد وعجبه الوسام وقرر ياخده منه غصب، ولما أحمد كان راجع من المدرسة، سامي وقفه في الطريق وطلب منه يديه الوسام اللي على صدره
ولكن أحمد قال له: هذا الوسام أعطته المعلمة لي لأني أنجزت واجباتي	لكن أحمد قال له: الوسام ده المعلمة ادتهولي لأني عملت واجباتي
ولكن سامي هاجمه وضربه وأخذ الوسام, فحزن أحمد أشد الحزن	لكن سامي هاجمه وضربه وأخد الوسام، أحمد حزن جدا
ومرت أيام متتالية لم يأت فيها سامي إلى المدرسة, وفرح معظم الأولاد لعدم قدومه وتمنوا لو يغيب عن المدرسة إلى الأبد	وعدت أيام متتالية وسامي ما جاش المدرسة، ومعظم الأولاد فرحوا لغيابه وتمنوا إنه ما يجيش المدرسة تاني
لكن أحمد قلق عليه لتغيبه الطويل وقال لرفاقه: يجب أن نزور سامي في بيته حتى نطمئن عليه لعله مريض	لكن أحمد كان قلقان عليه عشان غيابه الطويل وقال لزمايله: لازم نزور سامي في بيته عشان نطمن عليه يمكن يكون مريض
فأجابه رفاقه: سامي لا يستحق منا أن نزوره, ونحن على ثقة أنه يهرب من المدرسة ليقضي الوقت في التسكع هنا وهناك	زمايله ردوا عليه: سامي ما يستحقش نزوره، وإحنا متأكدين إنه بيهرب من المدرسة عشان يتسكع هنا وهناك
فقال لهم أحمد: ولكني سأذهب, فقال له عامر: سأذهب معك يا أحمد	فقال لهم أحمد: بس أنا هروح، فقال له عامر: أنا هروح معاك يا أحمد
وفعلاً توجه أحمد وعامر إلى بيت سامي, وعندما طرقا الباب فتحت لهما أم سامي وهي تبتسم	وفعلاً راح أحمد وعامر لبيت سامي، ولما خبطوا على الباب فتحت لهم أم سامي وهي بتبتسم
وعندما سألاها عن سبب تغيب سامي عن المدرسة أجابتهما بحزن أن سامي مريض ولا يستطيع النهوض من السرير من شدة الإعياء	ولما سألوها عن سبب غياب سامي عن المدرسة، ردت عليهم بحزن إن سامي مريض ومش قادر يقوم من السرير من شدة التعب
فطلبا منها أن يزوراه, فرحبت بهما وأدخلتهما إلى غرفة سامي	فطلبوا منها يزوروه، فرحبت بيهم ودخلتهم غرفة سامي
كان سامي متعب ويبدو عليه المرض وعندما رأى أحمد وعامر بدأ يبكي ويقول لهما أرجو أن تسامحاني على ما فعلت بكما	سامي كان تعبان وشكله مريض ولما شاف أحمد وعامر بدأ يبكي وقال لهم أرجو إنكم تسامحوني على اللي عملته فيكم
فقال له أحمد: الحمد لله على سلامتك, لا تقلق إني أسامحك لأننا مسلمون و المسلم يسامح أخاه المسلم حيث يقول الله تعالى (ادفع بالتي هي أحسن فإذا الذي بينك وبينه عداوة كأنه ولي حميم)	أحمد قال له: الحمد لله على سلامتك، ما تقلقش أنا مسامحك لأننا مسلمين والمسلم بيسامح أخوه المسلم، زي ما ربنا قال (ادفع بالتي هي أحسن فإذا الذي بينك وبينه عداوة كأنه ولي حميم)
وتعانق الأصدقاء, وعندما أراد سامي أن يعيد الوسام إلى أحمد, رفض أحمد وقال له: بل أنت ستضعه لأنه وسام الصداقة التي تجمعنا	وتعانق الأصدقاء، ولما سامي حب يرجع الوسام لأحمد، أحمد رفض وقال له: لا، أنت اللي حتحطه لأنه وسام الصداقة اللي بتجمعنا
v	Title =”لم كان للأرنب أذان طويلة”
حكى في قديم الزمان عن عائلة صغيرة من الأرانب تعيش في جحر جميل، ولها من الأطفال اثنان: أرنب وأرنوبة.. وذات يوم قالت الأم لولديها: إني ذاهبة لآتيكما بجزرة كبيرة من الحقل الذي بقربنا.. وصيتي لكما ألا تغادرا المنزل لأنكما صغيران.. والعالم الذي حولنا كبير.	كان يا ما كان في قديم الزمان، كان في عيلة صغيرة من الأرانب عايشين في جحر جميل، وكان عندهم طفلين: أرنب وأرنوبة.. وذات يوم قالت الأم لولديها: أنا رايحة أجيبلكم جزرة كبيرة من الحقل اللي قريب مننا.. وصيتي ليكم ما تخرجوش من البيت لأنكم صغيرين.. والعالم اللي حوالينا كبير.
وما أن ابتعدت الأم..حتى أسرعا إلى الباب ينظران من ثقبه.. قال أرنب لأخته أرنوب: إن أمنا على حق فالعالم كبير، ونحن مازلنا صغيرين.	وما إن الأم مشيت.. لحد ما جريوا على الباب يبصوا من ثقبه.. أرنب قال لأخته أرنوب: أمنا عندها حق، العالم كبير وإحنا لسه صغيرين.
ردت أرنوبة: هذا صحيح.. ولكن نحن مثل أمنا، لنا من الأرجل أربعة، وذيل مثل ذيلها.. هيا لنخرج لنرى قليلاً من هذا العالم، فوافقها أرنب.. وخرجا.. ثم أخذا يعدوان في الحقل الواسع يمرحان ويقفزان في كل مكان بين الخضرة والفواكه	أرنوبة ردت: ده صحيح.. لكن إحنا زي أمنا، عندنا أربع رجلين وذيل زي ذيلها.. يلا نخرج نشوف شوية من العالم ده، فوافقها أرنب.. وخرجوا.. بعدين بدأوا يجروا في الحقل الواسع يلعبوا وينطوا في كل مكان بين الخضرة والفواكه
وفجأة وقع بصرهما على قفص من الفواكه ذات الرائحة الشهية.. اقتربا منه. قالت أرنوبة إنه جزر.. تعال يا أرنب أسرع.. إنها فرصة لا تعوض.	وفجأة شافوا قفص مليان فواكه ريحتها لذيذة.. قربوا منه. أرنوبة قالت: ده جزر.. تعالى يا أرنب بسرعة.. دي فرصة لا تعوض.
وما إن قفزالاثنان على القفص، حتى وقع وتناثر ما بداخله. أرادا الهروب بسرعة لكنهما فوجئا بفتاة جميلة أمامها.. قبضت عليهما.. ورفعتهما من آذنيهما إلى أعلى وهى تهزهما بقوة: لقد أضعتما جهد يوم كامل من العمل المضني..	وما إن نطوا الاتنين على القفص، إلا ووقع وتناثر اللي جواه. حاولوا يهربوا بسرعة لكنهم فوجئوا ببنت جميلة قدامهم.. مسكتهم.. ورفعتهم من ودانهم لفوق وهي بتعنفهم: ضيعتوا تعب يوم كامل من الشغل الشاق..
وألقت بهما في حديقة المنزل وهى تقول: ابقيا هنا.. وتذكرا أنكما خرجتما إلى العالم مبكرين. هذا ما قالته الفتاة.	ورمتهم في جنينة البيت وهي بتقول: خليكم هنا.. وافتكروا إنكم خرجتم للعالم بدري. ده اللي قالته البنت.
ونظر الاثنان أحدهما إلى الأخر، وقد أطالت آذنيهما. ولأول مرة في حياتهم سمعا همساً خفيفاً حولهما، ثم سمعا باب الحديقة يفتح عندئذ.. وفي لمح البصر كانا خارج الحديقة يقفزان بقوة في طريقهما إلى البيت..	وبصوا لبعض، ولأول مرة في حياتهم ودانهم بقت طويلة. سمعوا همس خفيف حواليهم، بعدين سمعوا باب الجنينة بيفتح.. وفي لمح البصر كانوا برة الجنينة بينطوا بسرعة في طريقهم للبيت..
وهنا أدركا أن أذنيهما قد أصبحت طويلة وصارا يقفزان لأقل حركة.	وهنا فهموا إن ودانهم بقت طويلة وبقوا بينطوا مع أقل حركة.
Title =” قصة السمكة الكبيرة”	Title =” قصة السمكة الكبيرة”
في إحدى البحيرات كانت هناك سمكة كبيرة ومعها ثلاث سمكات صغيرات أطلتإحداهن من تحت الماء برأسها، وصعدت عالياً	في واحدة من البحيرات كان في سمكة كبيرة ومعاها ثلاث سمكات صغيرين واحدة منهم طلعت راسها من تحت المية، وطلعت فوق
رأتها الطيور المحلقة فوق الماء.. فاختطفها واحد منها!!	الطيور اللي طايرة فوق المية شافتها.. فواحدة منهم خطفتها!!
والتقمها..وتغذى بها!! لم يبق مع الأم إلا سمكتان !	وكلها..وتغذى بيها!! ما بقى مع الأم غير سمكتين!
قالت إحداهما : أين نذهب يا أختي؟	قالت واحدة منهم: هنروح فين يا أختي؟
قالت الأخرى: ليس أمامنا إلا قاع البحيرة...	قالت الثانية: مفيش قدامنا غير قاع البحيرة...
علينا أن نغوص في الماء إلى أن نصل إلى القاع!	لازم نغوص في المية لحد ما نوصل للقاع!
وغاصت السمكتان إلى قاع البحيرة ...	وغاصت السمكتين لقاع البحيرة ...
وفي الطريق إلى القاع ...	وفي الطريق للقاع ...
وجدتا أسراباً من السمك الكبير ..المفترس!	لقوا أسراب من السمك الكبير ..المفترس!
أسرعت سمكة كبيرة إلى إحدى السمكتين الصغيرتين	سمكة كبيرة هجمت على واحدة من السمكتين الصغيرين
فالتهمتها وابتلعتها وفرت السمكة الباقية.	وكلتها وابتلعتها والسمكة اللي فضلت هربت.
إن الخطر يهددها في أعلى البحيرة وفي أسفلها!	الخطر بيهددها في أعلى البحيرة وفي قاعها!
في أعلاها تلتهمها الطيور المحلقة ....	في أعلاها الطيور الطايرة بتاكلها ....
وفي أسفلها يأكل السمك الكبير السمك الصغير!	وفي قاعها السمك الكبير بياكل السمك الصغير!
فأين تذهب؟ ولا حياة لها إلا في الماء !!	فهتروح فين؟ مفيش حياة ليها غير في المية !!
فيه ولدت! وبه نشأت !!	فيه اتولدت! وفيه كبرت !!
أسرعت إلى أمها خائفة مذعورة‍ وقالت لها:	جريت لأمها خايفة ومرعوبة وقالت لها:
ماذا أفعل ياأمي ؟إذا صعدت اختطفني الطير‍‍‍‍‍‍‍‍‍!	أعمل إيه يا أمي؟ لو طلعت الطير هيخطفني ‍‍‍‍‍‍‍‍‍!
وإذا غصت ابتلعني السمك الكبير !	ولو غصت السمك الكبير هيبلعني !
قالت الأم : ياابنتي إذا أردت نصيحتي ... " فخير الأمور الوسط"	قالت الأم : يا بنتي لو عايزة نصيحتي ... " فخير الأمور الوسط"
Title =”قصص قصير جدا”	Title =”قصص قصير جدا”
في الربيع، والشمس مشرقة حطّ عصفور دوريّ على سور المدرسة سمع المعلمة تسأل الأطفال عن أجمل امرأة في الوجود لكن العصفور طار. وتنقّل من مكان لمكان. يسأل عن أجمل امرأة	في الربيع، والشمس مشرقة، حط عصفور دوري على سور المدرسة، سمع المعلمة بتسأل الأطفال عن أجمل ست في الدنيا، لكن العصفور طار. وتنقّل من مكان لمكان يسأل عن أجمل ست
وحين عاد والشمس لا تزال دافئة. حكى للفراخ الصغار. عمّا رأى في النهار. قال: ذهبت إلى الرسام. قلت: يا فنان اللون الأجمل أريد لوحة لأجمل امرأة في الوجود. قال: اذهب إلى البستاني	ولما رجع والشمس لسه دافية، حكى للفراخ الصغار عن اللي شافه في النهار. قال: رحت للرسام. قلت له: يا فنان اللون الأجمل، عايز لوحة لأجمل ست في الدنيا. قال لي: روح للبستاني
قلت: يا فنان الروض الأخضر. أريد وردة ناضرة لامرأة رائعة. قال: اذهب إلى بائع الورد.	قلت: يا فنان البستان الأخضر، عايز وردة نضرة لست رائعة. قال لي: روح لبائع الورد
يا بائع الورد: أريد وردة صافية مثل عينيها. قال: اذهب إلى بائع الزنابق.	يا بائع الورد، عايز وردة صافية زي عينيها. قال لي: روح لبائع الزنابق
يا بائع الزنبق: هل مسحت على رأسك أصابع الحنان؟ وهل ربتت على كتفك يد حانية؟ أريد زنبقاً كأصابعها. قال: اذهب إلى بائع الحرير.	يا بائع الزنبق، هل مسحت على راسك أصابع الحنان؟ وهل ربتت على كتفك يد حنونة؟ عايز زنبق زي أصابعها. قال لي: روح لبائع الحرير
يا بائع الحرير: هل شاهدت أزهار الياسمين؟ أريد ثوباً لأجمل امرأة. قال: اذهب إلى ذلك البيت القريب.	يا بائع الحرير، هل شفت أزهار الياسمين؟ عايز ثوب لأجمل ست. قال لي: روح للبيت القريب
في البيت القريب المجاور. وجدت اللوحة الجميلة. رأيت امرأة تعمل بمهارة. تمسح زجاج النافذة. تسقي أصيص الزهر. تقترب من طفل صغير. تسرح شعره. تعطيه قطعة حلوى.	في البيت القريب المجاور، لقيت اللوحة الجميلة. شفت ست بتشتغل بمهارة. بتمسح زجاج الشباك. بتسقي الزرع في الأصيص. بتقرب من طفل صغير، بتمشط شعره. بتديه قطعة حلوى
الطفل الصغير يحمل حقيبته المدرسية. وعلى ثغره ابتسامة يقبّل يد المرأة. وقبل أن ينطلق يقول: "شكراً يا ماما"	الطفل الصغير شايل شنطته المدرسية. وعلى وشه ابتسامة بيبوس إيد الست. وقبل ما يمشي يقول: "شكراً يا ماما"
Title =”قصة الممحاة والقلم”	Title =”قصة الممحاة والقلم”
تحاور الصديقان القلم والممحاة يوماً واشتد النقاش بينهما، حتى قال القلم:	اتحاوروا الصديقان القلم والممحاة يوم واتشد النقاش بينهم، لحد ما القلم قال:
- أنا أكرهك أيتها الممحاة المغرورة!!..	- أنا بكرهك أيتها الممحاة المغرورة!!..
ردت الممحاة بتعجب: لماذا يا صديقي القلم؟؟!!	ردت الممحاة بتعجب: ليه يا صديقي القلم؟؟!!
أجاب القلم: لأنك تمحي لي كل ما أكتبه.	رد القلم: عشان بتمحي لي كل اللي بكتبه.
ردت الممحاة بلطف: ولكني لا أمحو إلا الأخطاء فقط.	ردت الممحاة بلطف: بس أنا بمحي الأخطاء بس.
انزعج القلم وقال بعصبية: وما شأنكِ أنت ؟! أنا أكتب كل ما يحلو لي!!!	القلم اتضايق وقال بعصبية: وإنت مالك إنتِ؟! أنا بكتب اللي يعجبني!!!
ردت الممحاة بود: ولأني أحبك.. فأنا أمحو أخطاءك فقط حتى لا يراها أحد ويسخر منك!!!	ردت الممحاة بود: ولإني بحبك.. أنا بمحي أخطائك بس عشان محدش يشوفها ويضحك عليك!!!
قال القلم بغضب: أنت مغرورة.. لأن الذي يكتب أفضل من الذي يمحي!!!	القلم قال بغضب: إنتِ مغرورة.. عشان اللي بيكتب أحسن من اللي بيمحي!!!
تعجبت الممحاة من قول صديقها القلم وقالت بحزم:	الممحاة استغربت من كلام صديقها القلم وقالت بحزم:
- ألا تعلم – يا صديقي- أننا نكمل بعضنا البعض، لأن إزالةُ الخطأ تعادل كتابةَ الصواب..	- مش عارف - يا صديقي - إننا بنكمل بعض، عشان إزالة الخطأ زي كتابة الصح..
أطرق القلم لحظة مفكراً بكلام صديقته الممحاة، ثم رفع رأسه وقال:	القلم فكر شوية في كلام صديقته الممحاة، بعدين رفع رأسه وقال:
- صدقت يا عزيزتي الممحاة نحن صديقان لا نفترقان أبداً!!!	- صح يا عزيزتي الممحاة، إحنا صديقان ما نفترقش أبداً!!!
فرحت الممحاة بكلام صديقها القلم، وأمسكت بيده وعاشا معاً صديقين حميمين لا يفترقانِ ولا يختلفان.	الممحاة فرحت بكلام صديقها القلم، ومسكت إيده وعاشوا مع بعض صديقين حميمين ما يفترقوش وما يختلفوش.
Title =”كتكوت في خطر”	Title =”كتكوت في خطر”
في يومٍ من الأيام استيقظ الديك بوب، فوجد أن له 3 كتاكيت، وواحد آخر ظل في البيضة. خرج الديك بوب مع كتاكيته الصغار وتركوا الكتكوت زوزو في البيضة.	في يوم من الأيام صحي الديك بوب، لقى عنده 3 كتاكيت، وواحد تاني لسه في البيضة. خرج الديك بوب مع كتاكيته الصغيرين وسبوا الكتكوت زوزو في البيضة.
جاء الصيّاد الشرِّير ومعه بندقية، حيث حاول صيد الديوك والكتاكيت. وَصَلَ الصياد الشرير إلى بيضة الكتكوت زوزو، أخــــــــذ الصياد البيضة حيث كان زوزو داخل البيضة وهرب الصياد !!	جه الصياد الشرير ومعاه بندقية، كان بيحاول يصيد الديوك والكتاكيت. وصل الصياد الشرير لبيضة الكتكوت زوزو، أخد الصياد البيضة اللي كان زوزو جوه البيضة وهرب الصياد !!
قال الديك بوب في نفسه: إذا تركت زوزو فهل مكانه آمن! أحس الديك بوب أن خطرًا ما سيأتي على كتكوته الضغير، أخـــذ الديك بوب يركض حتى وصل إلى بيته فلم يجد الكتكوت زوزو.	قال الديك بوب في نفسه: لو سبت زوزو هنا، هل مكانه آمن؟ حس الديك بوب إن فيه خطر جاي على كتكوته الصغير، جري الديك بوب لحد ما وصل بيته ملقاش الكتكوت زوزو.
خرج الديك وأخذ يبحث على ابنه الصغير، فوجد الصياد يركض وبيده بيضة، أخذ الديك يركض وراءه. خاف الصياد الشرير، فمن شدة الخوف سقطت البيضة من يد الصياد وتكسرت وخرج الكتكوت زوزو من البيضة وعاد إلى إخوته بسلام.	خرج الديك وبدأ يدور على ابنه الصغير، لقى الصياد بيجري وفي إيده البيضة، جري الديك وراه. خاف الصياد الشرير، ومن شدة الخوف وقعت البيضة من إيده وتكسرت وخرج الكتكوت زوزو من البيضة ورجع لإخوته بسلام.
فرح الديك وإخوته كثيرًا بعودة الكتكوت زوزو، وندم الصياد على ما فعل	الديك وإخوته فرحوا جدا بعودة الكتكوت زوزو، والصياد ندم على اللي عمله
Title =” أرنوب والتفاح”	Title =” أرنوب والتفاح”
في الطريق .. وبينما كان أرنوب مع أمّه عائدين إلى بيتهما ، صادفتهما السلحفاة .. فبادرتها أمّ أرنوب بالتحيّة :	في الطريق.. وبينما كان أرنوب مع أمه راجعين لبيتهما، قابلتهم السلحفاة.. فسلمت أم أرنوب وقالت:
-مرحباً يا صديقتي السلحفاة. إلى أين تذهبين؟	- أهلاً يا صحبتي السلحفاة. رايحة فين؟
أجابتها السلحفاة: -إلى ضفة النهر. فقد سمعت من جارتنا السنجابة أنّ ثمار التفاح قد سقطت من أشجارها على الأرض، وأولادي يحبّون التفاح	ردت السلحفاة: -رايحة على ضفة النهر. سمعت من جارتنا السنجابة إن التفاح وقع من الشجر على الأرض، وعيالي بيحبوا التفاح
قالت أمّ أرنوب: -ولكنّ الوقت متأخّر، والشمس شارفت على المغيب. لماذا لا تنتظرين حتّى الصباح؟	قالت أم أرنوب: -بس الوقت متأخر، والشمس قربت تغيب. ليه ما تستنيش للصبح؟
أجابتها السلحفاة: -لو ظلّ التفّاح على الأرض حتّى الصباح، فإنني أخشى أن تصل إليه دودة الأرض قبلي.	ردت السلحفاة: -لو التفاح فضل على الأرض للصبح، بخاف إن دود الأرض يوصله قبلي.
ما إن سمع أرنوب بكلمة (تفاح) حتى لعق شفتيه بلسانه، وتوسّل بأمّه قائلاً: -ماما.. أرجوك.. أنا أحبّ التفّاح.. دعيني أذهب مع عّمتي السلحفاة.	أول ما أرنوب سمع كلمة (تفاح) لحس شفايفه بلسانه، واتوسل لأمه وقال: -ماما.. أرجوكِ.. أنا بحب التفاح.. خليني أروح مع طنط السلحفاة.
أجابته الأمّ: -ولكن يا أرنوب..	ردت الأم: -بس يا أرنوب..
قاطعتها السلحفاة: -سترافقاني أنتما الاثنان. فهذا سيخّفف علّي وحشة الطريق.	قاطعتها السلحفاة: -هتيجوا معايا انتوا الاتنين. ده هيخفف عليا وحشة الطريق.
قالت أمّ أرنوب: -اعذريني يا صديقتي السلحفاة. فزوجي سيحضر بعد قليل، وعليّ أن أعدّ له الطعام.	قالت أم أرنوب: -معلش يا صحبتي السلحفاة. جوزي هييجي كمان شوية، ولازم أحضرله الأكل.
قال أرنوب: -لقد سئمت أكل الجزر، وأشتهي أن آكل التفّاح.	قال أرنوب: -أنا زهقت من أكل الجزر، ونفسي آكل تفاح.
قالت السلحفاة: -إذن سترافقني بعد أن تسمح لك أمّك بذلك.	قالت السلحفاة: -طيب هتيجي معايا بعد ما أمك تسمحلك.
بعد أن أوصت الأرنبة ابنها أرنوب أن يسمع كلام عمّته السلحفاة، وتعهد لها بذلك، صعد أرنوب على ترس السلحفاة، متوجّهين إلى ضفة النهر.	بعد ما الأرنبة وصت ابنها أرنوب إنه يسمع كلام طنط السلحفاة، ووعدها بكده، ركب أرنوب على ظهر السلحفاة، ومشوا على ضفة النهر.
وفي الطريق شعر أرنوب أنّ السلحفاة بطيئة في مشيها، فنزل من على ترسها وهو يقول: -ما هذا يا عمتي السلحفاة ؟! لو بقيت تمشين هكذا فإنّنا لن نصل إلى ضفة النهر قبل الصباح.	وفي الطريق حس أرنوب إن السلحفاة بطيئة في مشيها، فنزل من على ظهرها وقال: -إيه ده يا طنط السلحفاة؟! لو فضلتِ ماشية كده مش هنوصل ضفة النهر قبل الصبح.
ابتسمت السلحفاة قائلة: -لا تتعجّل يا أرنوب.. لم يبقَ إلاّ القليل.	ابتسمت السلحفاة وقالت: -متستعجلش يا أرنوب.. فاضل شوية بس.
فقال أرنوب: -لا.. سأسبقك إلى هناك.. لأجمع التفّاح وأبقى بانتظارك.	فقال أرنوب: -لأ.. هسبقك لهناك.. عشان أجمع التفاح وأستناكي.
ابتعد أرنوب عن السلحفاة مسرعاً، بينما ظلّت السلحفاة تناديه: -ارجع يا أرنوب.. لقد تعهّدت لأمّك بأن تسمع كلامي.	ابتعد أرنوب عن السلحفاة بسرعة، والسلحفاة فضلت تنادي عليه: -ارجع يا أرنوب.. انت وعدت أمك إنك تسمع كلامي.
صاح أرنوب: -لقد مللت من خطواتك البطيئة.	صاح أرنوب: -أنا زهقت من خطواتك البطيئة.
كان ثعلوب يستلقي على بطنه، وهو يقاوم الجوع.. بانتظار الحصول على وجبة من الطعام، يملأ بها معدته الفارغة.	كان ثعلوب نايم على بطنه، وهو بيقاوم الجوع.. مستني ياكل حاجة يملأ بيها معدته الفاضية.
وفي هذه الأثناء أحسّ برائحة بدأت تنفذ في أنفه. فنهض وهو يحكّ أنفه ويقول: -هذه الرائحة أعرفها.. إنّها ليست غريبة عنّي. أنفي لا يخطيء أبداً.	في الوقت ده حس بريحة بدأت تدخل في مناخيره. فقام وهو يحك مناخيره ويقول: -الريحة دي أعرفها.. مش غريبة عني. مناخيري ما بتغلطش أبداً.
ثمّ داعب بطنه وهو يضحك ويقول: -لقد أتتك وجبة شهيّة يا معدتي العزيزة. آه.. ما أشهى طعم الأرانب!!	وبعدين دلك بطنه وهو بيضحك ويقول: -أهي جتلك أكلة حلوة يا معدتي العزيزة. آه.. ما أحلى طعم الأرانب!!
ما إن مرّ أرنوب من أمام العشب الذي كان يختبيء فيه ثعلوب، حتى قفز عليه وأمسك به بأسنانه. ارتعب أرنوب، وصار يصرخ بأعلى صوته: -النجدة.. النجدة.. الثعلب سيأكلني.. أنجدوني..	أول ما مرّ أرنوب من قدام العشب اللي كان ثعلوب مستخبي فيه، نط عليه ومسكه بسنانه. أرنوب اترعب، وبدأ يصرخ بأعلى صوته: -النجدة.. النجدة.. الثعلب هيأكلني.. الحقوني..
ولكنّ أحداً لم يسمع صيحات أرنوب واستغاثته.	بس محدش سمع صريخ أرنوب ونداءاته.
بعد أن وصلت السلحفاة إلى ضفة النهر، ورأت ثمار التفاح تملأ الأرض، عرفت أنّ أرنوب لم يصل إليها.. وأنّه ربما يكون بحاجة للمساعدة.	بعد ما السلحفاة وصلت لضفة النهر، وشافت التفاح مالي الأرض، عرفت إن أرنوب ما وصلش ليها.. وإنه يمكن يكون محتاج مساعدة.
فقّررت أن تخبر صديقتها الأرنوبة بذلك.. لكنّها فكّرت ثم قالت: -ولكنّ رجوعي إلى بيت الأرنوبة سيستغرق وقتاً طويلاً، وربّما يكون أرنوب في خطر. عليّ أن أتصرف بسرعة.	فقررت تقول لصاحبتها الأرنبة.. بس فكرت وقالت: -لكن رجوعي لبيت الأرنبة هياخد وقت كتير، ويمكن أرنوب يكون في خطر. لازم أتصرف بسرعة.
في بيت ثعلوب كان أرنوب يصرخ متوسّلاً: -أرجوك يا ثعلوب.. لا تأكلني.. أنا خائف..	في بيت ثعلوب كان أرنوب بيصرخ ويترجى: -أرجوك يا ثعلوب.. ما تاكلنيش.. أنا خايف..
فضحك ثعلوب وهو يقول: -وأنا جائع.. كفاك ثرثرة ودعني أهيء مائدة الطعام.	فضحك ثعلوب وهو يقول: -وأنا جعان.. بلاش رغي وسيبني أجهز السفرة.
وراح ثعلوب يعدّ مائدته لاستقبال وجبة شهيّة. وضع الصحون والسكاكين.. لكنّه عندما بحث عن الشوكة لم يجدها. فصاح: -ترى أين اختفت الشوكة؟	وراح ثعلوب يجهز السفرة عشان يستقبل أكلة شهيّة. حط الأطباق والسكاكين.. بس لما دور على الشوكة ملقهاش. فصاح: -يا ترى الشوكة راحت فين؟
لم يشعر ثعلوب إلا والشوكة تنغرس بقوّة في رجله، وصوت يأتيه من الخلف يقول: -هذه هي شوكتك يا ثعلوب.. إيّاك أن تغدر بأصدقائك الحيوانات بعد الآن.	لم يشعر ثعلوب إلا والشوكة بتتغرز بقوة في رجله، وصوت جاي من وراه بيقول: -أهي الشوكة بتاعتك يا ثعلوب.. إياك تغدر بأصدقائك الحيوانات بعد كده.
قفز ثعلوب من شدّة الألم فصاح: -آه.. آه رجلي..	ثعلوب نط من شدة الألم فصاح: -آه.. آه رجلي..
سارعت السلحفاة لإنقاذ أرنوب من الحبل، وخرجا من بيت ثعلوب الذي انشغل بمعالجة رجله. احتضن أرنوب عّمته السلحفاة وهو يقول لها خجلاً: -لقد كنت بطيئة في مشيك يا عّمتي السلحفاة، لكنّك كنت سريعة في إنقاذي. إني نادم على فعلتي هذه. ومن الآن لن أعصي كلام مَن هو أكبر منّي أبداً.	السلحفاة جريت عشان تنقذ أرنوب من الحبل، وخرجوا من بيت ثعلوب اللي انشغل بمعالجة رجله. أرنوب حضن طنط السلحفاة وقال لها بخجل: -كنت بطيئة في مشيك يا طنط السلحفاة، لكنك كنت سريعة في إنقاذي. أنا ندمان على اللي عملته. ومن دلوقتي مش هعصي كلام حد أكبر مني أبداً.
Title =”الزرافة زوزو”	Title =”الزرافة زوزو”
زوزو زرافة رقبتها طويلة.	زوزو زرافة رقبتها طويلة.
الحيوانات الصغيرة تخاف منها .. مع أنها لطيفة … لطيفة ..	الحيوانات الصغيرة بتخاف منها .. مع إنها لطيفة .. لطيفة ..
عندما تراها صغار الحيوانات تسير تخاف من رقبتها التي تتمايل .. تظن أنها قد تقع عليها ..	لما صغار الحيوانات تشوفها ماشية بتخاف من رقبتها اللي بتتمايل .. بتفتكر إنها هتقع عليها ..
أحيانا لا ترى الزرافة أرنبا صغيرا أو سلحفاة لأنها تنظر إلى البعيد ..	أحيانًا الزرافة ما بتشوفش أرنب صغير أو سلحفاة عشان هي بتبص على البعيد ..
وربما مرت في بستان جميل وداست الزهور .	ويمكن تعدي في بستان جميل وتدوس على الزهور.
عندها تغضب الفراش و النحل .	ساعتها الفراش والنحل بيزعلوا.
الحيوانات الصغيرة شعرت بالضيق من الزرافة .	الحيوانات الصغيرة حسّت بالضيق من الزرافة.
الزرافة طيبة القلب .. حزنت عندما علمت بذلك	الزرافة طيبة القلب .. زعلت لما عرفت كده.
صارت الزرافة تبكي لأنها تحب الحيوانات جميعا .	الزرافة بقت تعيط عشان هي بتحب الحيوانات كلها.
لكن الحيوانات لم تصدقها ..	بس الحيوانات ما صدقتهاش ..
رأت الزرافة عاصفة رملية تقترب بسرعة من المكان .	الزرافة شافت عاصفة رملية جاية بسرعة على المكان.
الحيوانات لا تستطيع رؤية العاصفة لأنها أقصر من الأشجار.	الحيوانات ما تقدرش تشوف العاصفة عشان هي أقصر من الأشجار.
صاحت الزرافة محذرة الحيوانات .	الزرافة صرخت تحذر الحيوانات.
هربت الحيوانات تختبئ في بيوتها وفي الكهوف وفي تجاويف الأشجار .	الحيوانات جريت تختبئ في بيوتها وفي الكهوف وفي تجاويف الأشجار.
لحظات وهبت عاصفة عنيفة دمرت كل شيء ..	لحظات والعاصفة العنيفة جات ودمرت كل حاجة..
بعد العاصفة شعرت الحيوانات أنها كانت مخطئة في حق الزرافة فصارت تعتذر منها .	بعد العاصفة الحيوانات حسّت إنها كانت غلطانة في حق الزرافة فبدأت تعتذر لها.
كانت الزرافة زوزو سعيدة جدا لأنها تحبهم جميعا ..	الزرافة زوزو كانت مبسوطة جدًا عشان هي بتحبهم كلهم.
Title =”العنكبوت والنملة”	Title =”العنكبوت والنملة”
كانتِ النملةُ الصغيرة، تصعدُ جدارَ البيت، وعندما بلغَتْ زاويته، شاهدَتْ بيتَ عنكبوت..	كانت النملة الصغيرة بتطلع جدار البيت، ولما وصلت زاويته، شافت بيت عنكبوت..
اقتربَتْ منه تتفحَّصُهُ، فرأَتْ نسجه دقيقاً، وخيوطه واهية، وفي ناحية منه، كمنتِ العنكبوتُ، ساكنةً هادئة..	قربت منه تتفحصه، لقت نسيجه دقيق وخيوطه ضعيفة، وفي ناحية منه، العنكبوت قاعدة ساكنة هادئة..
تأمّلَتْها زمناً طويلاً..	تأملتها لوقت طويل..
لم تبارحْ مكانها!	ما برحتش مكانها!
رفعتِ النملةُ رأسها، وقالت للعنكبوت:	النملة رفعت رأسها، وقالت للعنكبوت:
-ألا تخرجينَ من بيتك؟!	-مش هتخرجي من بيتك؟!
-ولمَ الخروج؟	-وليه أخرج؟
-لتعملي كما نعمل.	-تشتغلي زي ما احنا بنشتغل.
أنا لا أعمل	أنا مش بشتغل
-وكيف تكسبين قوتكِ؟!	-بتجيبي أكلك ازاي؟!
-أكسبه وأنا قاعدة هنا.	-بجيبه وأنا قاعدة هنا.
-كيف؟!	-ازاي؟!
-استريحي جانباً، وانظري ما أفعل.	-استريحي على جنب، وشوفي أنا بعمل ايه.
مكثتِ النملةُ، لترقبَ ما سيجري..	النملة قعدت تراقب اللي هيحصل..
بعد حين..	بعد شوية..
جاءت ذبابةٌ، تطنُّ وتطيرُ، وهي مسرعة طائشة، فعلقَتْ بشبكة العنكبوت..	جات ذبابة بتطن وتطير بسرعة وطياشة، فحصلت في شبكة العنكبوت..
اهتزَّتْ خيوطُ الشبكة.. أحسَّتِ العنكبوتُ بالفريسة، فغادرَتْ مكمنها، واندفعَتْ نحوها، وأخذَتْ تلفُّها بخيوطٍ تفرزها..	اهتزت خيوط الشبكة.. العنكبوت حست بالفريسة، فخرجت من مكانها واندفعت نحوها، وبدأت تلفها بخيوط تفرزها..
كافحتِ الذبابةُ لتفلتَ، فلم تستطعْ خلاصاً، فجعلَتْ تصرخ:	الذبابة كافحت عشان تفلت، لكن ما قدرتش تهرب، فبدأت تصرخ:
-ارحميني أيتها العنكبوت!	-ارحميني يا عنكبوت!
ضحكتِ العنكبوتُ ساخرةً، وظلَّتْ تكفِّنها بخيوطها، حتى سكنَتْ حركتها..	العنكبوت ضحكت بسخرية، وظلت تلفها بخيوطها، لحد ما وقفت حركتها..
أنشبَتْ فيها أنيابها، وبدأَتْ تمتصُّ دماءها، حتى صارت جوفاً فارغاً..	غرست فيها أنيابها، وبدأت تمتص دمها، لحد ما بقت جوف فاضي..
ألقتْ بها بعيداً، ومضتْ إلى مكمنها، منفوخةَ البطن، تنتظر فريسةً جديدة.	رمتها بعيد، ورجعت لمكانها، بطنها منفوخ، مستنية فريسة جديدة.
دنَتْ النملةُ إليها، فقالتِ العنكبوت:	قربت النملة منها، فقالت العنكبوت:
-عرفْتِ كيف أكسبُ قوتي؟	-عرفتي أنا بجيب أكلي ازاي؟
-لقد عرفْتُ	-أيوة عرفت
-هل أعجبكِ؟	-عجبك؟
-لا.	-لأ.
-لماذا؟	-ليه؟
-لأنه ظلمٌ واحتيال	-عشان ده ظلم واحتيال
-وكيف تكسبين أنتِ قوتكِ؟	-وإنتي بتجيبي أكلك ازاي؟
قالت النملة:	قالت النملة:
-أكسبهُ بالجدِّ والعمل.	-بجيبه بالجد والعمل.
-ولكنَّ العملَ شاقٌ!	-بس الشغل متعب!
-الكسبُ الشريفُ، لا يكون إلا بالعمل.	-الكسب الشريف، ما يجيش غير بالشغل.
أدارتِ النملةُ ظهرها، فقالت العنكبوت هازئة:	النملة دارت ظهرها، فقالت العنكبوت بسخرية:
-أين تسكنين يا عاملتي الصغيرة؟	-إنتي ساكنة فين يا شغيلة الصغيرة؟
-بيتي قريبٌ من هنا	-بيتي قريب من هنا
-أتسمحين لي بالسكن معكِ؟	-تسمحيلي أسكن معاكي؟
-لا.	-لأ.
-لماذا؟	-ليه؟
قالتِ النملةُ، وهي تنصرف:	قالت النملة وهي بتمشي:
-لأنكِ تكسبين رزقكِ بالغش والخداع، وأنا لا أقبل هذا.	-عشان إنتي بتجيبي رزقك بالغش والخداع، وأنا ما بقبلش ده.
” Title =” مملكة الكراسي الخشبيّة”	” Title =” مملكة الكراسي الخشبيّة”
يُحكى أن في قديمِ الزمانِ جندياً، غافلَ يوماً الملكَ، وجلسَ على عرشه، وراحَ يصرخُ صراخاً مُدويّاً: "أنا الآن ملكُ البلادِ".	يُحكى إن في قديم الزمان، جندي غافل الملك يوم، وقعد على عرشه، وفضل يصرخ بصوت عالي: "أنا دلوقتي ملك البلاد".
تردّدتْ صرختُه في أرجاءِ القصرِ، ووصلتْ أسماعَ الملكِ وحاشيتِه الّذين فاجؤوا الجنديَّ، وهو مازالَ جالساً على العرشِ، يرتجفُ من هَوْلِ المفاجأةِ، والجنودُ يُشهرون سيوفَهم الّلامعةَ في وجهِه،	صرخته اترددت في أنحاء القصر، ووصلت لودان الملك وحاشيته اللي فاجؤوا الجندي وهو لسه قاعد على العرش، بيرتجف من هول المفاجأة، والجنود مشهرين سيوفهم اللامعة في وشه،
ولكنّ الملكَ أمرهم أن ينصرفوا عنه، ويتركوه وهذا الجنديَّ.	لكن الملك أمرهم إنهم ينصرفوا عنه، ويسيبوه مع الجندي ده.
نهضَ عندئذٍ الجنديُّ من مكانِه، فأشار إليه الملكُ أن يجلسَ، فجلس، والسّيافُ يتراءى أمام عينيه المذعورتين شاهراً سيفه، يهُمّ بضربِ عُنقِه، فيرتعدُ هَلَعاً وخوفاً.	نهض الجندي من مكانه، فأشار له الملك إنه يقعد، فقعد، والسياف قدامه وشايل سيفه، مستعد إنه يضرب عنقه، فارتعد من الهلع والخوف.
حاول الجنديّ أن يفتحَ عينيه، ويرفعَ رأسَه قليلاً، فلم يستطعْ، وحاولَ أن ينهضَ من مكانِه ثانيةً، فلم تحملْه قدماه، والقصرُ يدورُ به، فلا يهدأُ، ولا يستقرُّ.	حاول الجندي يفتح عينيه، ويرفع رأسه شوية، ما قدرش، وحاول ينهض من مكانه تاني، ما حملتهوش رجليه، والقصر بيدور بيه، ما هدأش ولا استقر.
سأله الملكُ مستغرباً: -أتظنُّ أنّ هذا الكرسيَّ الخشبيَّ يجعلُكَ ملكاً؟!	سأله الملك مستغرب: -أنت فاكر إن الكرسي الخشبي ده يخليك ملك؟!
أجابَ الجنديُّ، وهو يتلعثمُ: -هو مجرّدُ حُلُمٍ، يا صاحبَ الجلالةِ، ظلَّ يراودني منذ صغري.	رد الجندي وهو بيتلجلج: -ده مجرد حلم، يا صاحب الجلالة، من وأنا صغير بيجيلي.
ثمُ أردفَ الملكُ ضاحكاً: -أنتَ الآن ملكٌ، وأنا أحدُ رعاياكَ. بمَ ستحكمُ عليّ لو انقلبتُ عليكَ.	الملك ضحك وقال: -أنت دلوقتي ملك، وأنا واحد من رعاياك. هتحكم عليّ بإيه لو أنا انقلبت عليك.
هبَّ الجنديُّ واقفاً، وقالَ معتذراً: -أستغفرُ اللهَ، يا صاحبَ الجلالةِ، ما أنا إلاّ عبدٌ من عبيدِكَ.	هبّ الجندي واقف، وقال معتذرًا: -أستغفر الله، يا صاحب الجلالة، أنا مش إلا عبد من عبيدك.
قالَ الملكُ: -اجلسْ، اجلسْ، أيّها الجنديُّ، وقلْ لي: كيف ستحكمُ بين هؤلاء النّاسِ الذين لا همَّ لهم إلاّ التآمرُ عليّ وعلى مملكتي.	قال الملك: -اقعد، اقعد، أيها الجندي، وقول لي: هتحكم إزاي بين الناس دول اللي كل همهم إنهم يتآمروا عليّ وعلى مملكتي.
قالَ الجنديُّ، وهو مطرقُ الرّأسِ: -إنّهم-يا صاحبَ الجلالةِ- لا يستحقّون إلاّ الموتَ، فلا رأفةَ بهم، ولا عطفَ عليهم.	الجندي قال وهو مطرق رأسه: -إنهم-يا صاحب الجلالة- ما يستحقوش غير الموت، لا رأفة بيهم، ولا عطف عليهم.
قالَ الملكُ: -لا شكّ في أنّكَ جنديٌّ مخلصٌ لي وللوطنِ. أيّها الجنديُّ، أنتَ منذ اليومِ وليُّ عهدي الأمينُ.	الملك قال: -ما فيش شك إنك جندي مخلص لي وللوطن. أيها الجندي، أنت من النهارده ولي عهدي الأمين.
يُحكى بعدئذٍ أنّ وليَّ العهدِ انقلبَ يوماً على الملكِ، وزجّه في السِّجنِ، حتّى ماتَ، وجلسَ على عرشِه منتشياً، لا يفارقُه لحظةً،	يُحكى بعد كده إن ولي العهد انقلب يوم على الملك، وزجه في السجن، لحد ما مات، وقعد على عرشه مبسوط، ما فارقوش لحظة،
ولكنّ جنديّاً غافله يوماً، وجلسَ عليه، وهو يقولُ: -أنا الآن ملكُ الزّمانِ.	لكن جندي غافله يوم، وقعد على الكرسي، وهو بيقول: -أنا دلوقتي ملك الزمان.
ويحكى أنّ الملكَ تلمّسَ عندئذٍ رأسَه، وهو يرى أحدَ جنودِه يجلسُ مكانَه، وأمرَ من فوره السّيافَ أن يضرِبَ عنقَه، حتّى يكونَ عِبرةً لغيره من الجنودِ الذين لا يروقُ لهم من كراسي القصرِ جميعِها إلاّ كرسيُّ الملكِ.	ويحكى إن الملك لمس رأسه، وهو شايف واحد من جنوده قاعد مكانه، وأمر من فوره السياف إنه يضرب عنقه، عشان يكون عبرة لغيره من الجنود اللي ما يعجبهمش من كراسي القصر كلها إلا كرسي الملك.
Title =”من أخفى كتابي”	Title =”من أخفى كتابي”
رُنَّ جرس المدرسة معلناً عن موعد الاستراحة، فتوجّه كلّ التلاميذ إلى الملعب. وفي زاويته، جلست تلميذتان من الصف الخامس الأساسي على مقعدٍ صغير لتتناولا طعامهما، وفجأة رَكَل أحد الأولاد الكرة بقوّة فأصابت الفتاتين ووقع طعامهما، على الأرض وتلوّث بالتراب.	رن جرس المدرسة معلناً عن موعد الاستراحة، فتوجه كل التلاميذ إلى الملعب. وفي زاويته، قعدت تلميذتين من الصف الخامس الأساسي على مقعد صغير عشان ياكلوا، وفجأة واحد من الأولاد شاط الكورة بقوة فأصابت البنتين ووقع أكلهم على الأرض وتوسخ بالتراب.
فغضبتا كثيراً، وسرعان ما اكتشفتا أنه زميلهما في الصّف؛ إذاً... سامي هو الفاعل! عندها، قرّرتا الانتقام منه، فأخذتا كتاب الرياضيات من حقيبته وخبأتاه في مكانٍ بعيدٍ عن الأنظار، وقد كان بحاجة ماسّة إليه ليذاكر لامتحان الغد...	غضبوا جداً، وسرعان ما اكتشفوا أنه زميلهم في الصف؛ إذن... سامي هو اللي عمل كده! عندها، قرروا ينتقموا منه، فأخذوا كتاب الرياضيات من شنطته وخبوه في مكان بعيد عن الأنظار، وكان محتاجه بشدة عشان يذاكر لامتحان بكره...
عندما عاد سامي إلى المنزل، اكتشف اختفاء كتابه فلم يتمكن من المذاكرة للامتحان..	لما سامي رجع البيت، اكتشف إن كتابه مختفي فما قدرش يذاكر للامتحان..
بعد إعلان نتيجة الامتحان، اتّضح أن سامي المتفوق لم ينل نتيجة مُرضية بسبب عدم مذاكرته! وكانت والدته قد اتصلت بالمعلِّمة وأخبرتها بأن أحدهم قد أخفى كتاب ابنها بعد أن تأكد من إعادته إلى حقيبته؛ فقامت المعلمة بعد الامتحان بالبحث عن الكتاب حتى وجدته.	بعد إعلان نتيجة الامتحان، اتضح أن سامي المتفوق ما جابش نتيجة كويسة بسبب إنه ما ذاكرش! وكانت والدته اتصلت بالمدرسة وقالت إن حد خبى كتاب ابنها بعد ما تأكد إنه رجعه لشنطته؛ فقامت المدرسة بعد الامتحان بالبحث عن الكتاب لحد ما لاقته.
وعندما انتهت من إعلان النتائج، أخرجت الكتاب من حقيبتها ولوّحت به قائلة: "وجدت كتاب سامي في الخزانة البارحة، وأنا أعلم أن أحدكم قد خبأ الكتاب حتى لا يتمكن زميلكم من المذاكرة للامتحان. أطلب من الفاعل أن يقف ويعترف بخطئه".	ولما خلصت من إعلان النتائج، أخرجت الكتاب من شنطتها ولوحت به وقالت: "لقيت كتاب سامي في الخزانة امبارح، وأنا عارفة إن حد فيكم خبى الكتاب عشان زميلكم ما يعرفش يذاكر للامتحان. بطلب من اللي عمل كده إنه يقف ويعترف بخطأه".
بدأ التلاميذ يتهامسون فيما بينهم، أمّا سارة ويارا، فقد احمرّت وجنتيهما، ولكنهما لزمتا الصمت ولم تعترفا للمعلمة بخطئهما. ظلّ الصف ساكناً لثوانٍ معدودة، فقالت المعلمة مهدّدة: "هكذا إذاً، سوف أحذف علامتين من الامتحان لكل الصف إلاّ إذا اعترف المذنب بخطئه".	بدأ التلاميذ يتهامسوا فيما بينهم، أما سارة ويارا، فقد احمرت وجنتيهم، لكنهم فضلوا ساكتين وما اعترفوش للمدرسة بخطأهم. فضل الفصل ساكت لثواني معدودة، فقالت المدرسة مهددة: "كده إذن، هحذف علامتين من الامتحان لكل الفصل إلا لو اعترف المخطئ بخطأه".
لم تتمالك سارة ويارا نفسيهما فبادرتا بالاعتراف بفعلتهما. عندئذٍ، قالت المعلمة التي فوجئت بأنهما الفاعلتين رغم أنهما مجتهدتين فقالت لهما: سأحذف خمس علامات من امتحانكما عقاباً لكما بسبب ما بدر منكما.	سارة ويارا ما قدروش يمسكوا نفسهم فاعترفوا بعملتهم. عندئذٍ، قالت المدرسة اللي اتفاجئت إنهم هما اللي عملوا كده رغم إنهم مجتهدين: هحذف خمس علامات من امتحانكم عقاباً ليكم بسبب اللي عملتوه.
أنتما فتاتان مسلمتان مهذبتان ولا ينبغي أن تتصرّفا بهذا الشكل! ما اقترفتماه لا يوافق أخلاق المسلمين، وهذا ليس من الأخلاق التي علّمنا إيّاها الإسلام".	أنتم بنتين مسلمات مؤدبات وما ينفعش تتصرفوا كده! اللي عملتوه ده مش من أخلاق المسلمين، وده مش من الأخلاق اللي علمناها الإسلام".
اعتذرت سارة ويارا إلى سامي ثم إلى المعلمة. ولتعوّضا عمّا فعلتاه، وعدتا أن تبقيا وقت الاستراحة لمساعدة زميلاتهما اللواتي تواجهن صعوبة في مادة الرياضيات. أما سامي، فقد أعطته المعلمة فرصةَ إعادة الامتحان ليحضِّر بشكل جيِّد ويعدِّل من علامته.	سارة ويارا اعتذروا لسامي وبعدين للمدرسة. ولتعويض اللي عملوه، وعدوا إنهم يقعدوا وقت الاستراحة يساعدوا زميلاتهم اللي عندهم صعوبة في مادة الرياضيات. أما سامي، المدرسة اديته فرصة إعادة الامتحان عشان يذاكر كويس ويعدل درجته.
Title =”ساره ومحمد والصدقة”	Title =”ساره ومحمد والصدقة”
خرج محمد مع أخته سارة في أحد الأيام	خرج محمد مع أخته سارة في يوم من الأيام
وفي الطريق شاهد محمد رجل فقير ومحتاج ... مد محمد يده وأخرج بعض من النقود وأعطاها للفقير .. شكر الفقير محمد وقال له : سلمت يمينك يا ولدي	وفي الطريق شاف محمد راجل فقير ومحتاج ... مد محمد إيده وطلع شوية فلوس وأعطاها للفقير .. شكر الفقير محمد وقال له: سلمت يمينك يا ابني
وبعد ذلك سألت سارة أخاها محمد : محمد لماذا أعطيت هذا الرجل نقود ؟؟	وبعد كده سألت سارة أخوها محمد: محمد ليه أعطيت الراجل ده فلوس؟
فقال محمد : أنه رجل محتاج والله تعالى أمرنا بمساعدة الفقراء والمحتاجين ومد يد العون لهم فقد خلق الله لنا هذه اليد لعمل الخير ومساعدة الفقراء والمحتاجين	فقال محمد: ده راجل محتاج وربنا أمرنا بمساعدة الفقراء والمحتاجين ومد يد العون ليهم، فقد خلق الله لنا هذه الإيد لعمل الخير ومساعدة الفقراء والمحتاجين
فسألت سارة : وبماذا تتميز اليد لكي تستطيع القيام بهذه المهمة ؟؟	فسألت سارة: وبماذا تتميز الإيد لكي تقدر تقوم بهذه المهمة؟
فأجاب محمد : اليد يمكننا بواسطتها مسك الأشياء فنقوم بمسك النقود بها ومدها لتصل ليد الرجل المحتاج فيأخذها	فأجاب محمد: الإيد نقدر نمسك بيها الحاجات فنقوم بمسك الفلوس بيها ومدها لتوصل ليد الراجل المحتاج فيأخذها
سارة : ما اجمل عمل اليد ... سأساعد الفقراء وأمد لهم يدي للمساعدة ....	سارة: ما أجمل عمل الإيد ... سأساعد الفقراء وأمد لهم إيدي للمساعدة ....
Title =”سامر الذكي”	Title =”سامر الذكي”
بعد انتهاء المدرسة، ذهب سامر إلى القرية لزيارة جده.	بعد انتهاء المدرسة، راح سامر القرية عشان يزور جده.
في صباح اليوم التالي، كان يسير بجانب النهر ويقطف الأزهار.	في صباح اليوم التالي، كان ماشي جنب النهر ويقطف الأزهار.
رآه ذئب جائع ففرح كثيرا وقال:	شافه ذئب جائع ففرح جدا وقال:
ـ يا له من ولد جميل ولا بد أن آكله قبل أن يراني أحد.	ـ يا له من ولد جميل ولازم آكله قبل ما حد يشوفني.
اقترب من سامر.	قرب من سامر.
حين رأه يقترب منه خاف وتراجع إلى الوراء وقال:	لما شافه يقرب منه خاف وراجع لورا وقال:
ـ ابتعد عني أيها الذئب.	ـ ابعد عني يا ذئب.
لكنه ظل واقفا أمامه وقال:	لكنه فضل واقف قدامه وقال:
ـ أنا جائع ولا بد أن أكلك.	ـ أنا جعان ولازم آكلك.
فكر سامر قليلا ثم قال للذئب:	سامر فكر شوية وبعدين قال للذئب:
ـ انظر إلى جسمي الهزيل أيها الذئب الطيب، فأنا مريض.	ـ بص على جسمي الهزيل يا ذئب الطيب، أنا مريض.
وإذا أكلتني ستصاب بالمرض وستموت وستكون طعاما للوحوش.	ولو كلتني هتعيى وتموت وهتبقى أكل للوحوش.
ولكن لا تخف، تعال معي إلى بيت جدي. هناك يوجد الكثير من الدجاج والديوك وسأعطيك منها ما تشاء. ما رأيك؟	لكن ما تخافش، تعالى معايا بيت جدي، هناك في دجاج وديوك كتير وهاعطيك منهم اللي تحبه، إيه رأيك؟
سال لعاب الذئب، ودون تفكير قال:	سال لعاب الذئب، وبدون تفكير قال:
ـ هيا بنا فأنا أحب الدجاج كثيرا.	ـ يلا بينا أنا بحب الدجاج جدا.
ابتسم سامر في سره وسار معه باتجاه بيت جده.	سامر ابتسم في سره ومشي معاه ناحية بيت جده.
حين وصل، التفت نحو الذئب وقال له:	لما وصل، قال للذئب:
ـ ادخل إلى غرفة المؤونة تلك، فالدجاج والديوك بانتظارك.	ـ ادخل غرفة المؤونة هناك، الدجاج والديوك مستنيينك.
ركض الذئب إلى داخل الغرفة وترك سامرا يتوجه نحو جده الذي كان يعمل في البستان.	ركض الذئب لجوة الغرفة وسب سامر يروح لجده اللي كان بيشتغل في البستان.
قال له وهو يلهث:	قال له وهو يلهث:
ـ الحقني يا جدي، فهناك ذئب حاول اصطيادي.	ـ الحقني يا جدي، في ذئب حاول يصطادني.
لقد أدخلته إلى غرفة المؤونة بعد أن أوهمته بأنها تحوي الدجاج والديوك.	دخلته غرفة المؤونة بعد ما أوهمته إنها مليانة دجاج وديوك.
ركض الجد وهو يحمل الرفش.	جده جري وهو شايل الرفش.
أهوى به على رأس الذئب الذي كان يبحث عن طعام.	وضرب الذئب على رأسه وهو بيدور على أكل.
ثم عاد إلى سامر، حمله وقبّله وقال:	وبعدين رجع لسامر، شاله وباسه وقال:
ـ يا لك من ولد ذكي.	ـ يا لك من ولد ذكي.
أما الذئب فقد كان جثة هامدة، وهذا بفضل ذكاء سامر.	أما الذئب فقد بقى جثة هامدة، وده بفضل ذكاء سامر.
Title =”الضفدع و الباعوض”	Title =”الضفدع و الباعوض”
كانَ ضفدعٌ منهمكاً في صيد البعوض بلسانهِ...	كان فيه ضفدع مشغول بصيد البعوض بلسانه...
سألته بعوضةٌ كانت واقفة على غصن بعيدةً عن لسانه:	سألته بعوضة كانت واقفة على غصن بعيد عن لسانه:
لماذا أنتَ هكذا، تطاردنا دائماً وتصطادنا؟!	ليه إنت كده، بتطاردنا دايماً وتصطادنا؟!
نظر الضفدعُ إليها بدهشةٍ وقال:	الضفدع بص لها بدهشة وقال:
لأنكم مزعجون، تدخلون غرف النوم، تقفون على وجه طفلٍ نائمٍ، ثم تملأون بطونكم من دمه..	لأنكم مزعجين، بتدخلوا غرف النوم، وتقفوا على وش طفل نايم، وبعدين تملوا بطونكم من دمه..
اقتربتِ البعوضة منه وهزت يدها أمام وجههِ، وقالتْ ساخرةً:	البعوضة قربت منه وهزت يدها قدام وشه، وقالت بسخرية:
وأنتَ مالك!! هل شاهدتنا يوماً في غرفةِ نومِكَ يا ضفدع!!؟..	وأنت مالك!! شفتنا في يوم في غرفة نومك يا ضفدع!!؟..
طبعاً لا يا بعوضة..، وقفز بسرعة والتقطها بلسانه ثم ابتلعها وشرب ماءً فوقها، ابتسم وقال:	طبعاً لا يا بعوضة..، ونط بسرعة وخدها بلسانه وبعدين بلعها وشرب ميه فوقها، ابتسم وقال:
المغفّلةُ جاءتْ تحاكمني!! وهزَّ رأسَه عدّة هزّاتٍ، ثم راح ينتظرُ بعوضةً أخرى	المغفلة جات تحاكمني!! وهز رأسه كذا مرة، وبعدين راح يستنى بعوضة تانية
Title =”كانت المعجزة بدولار واحد فقط”	Title =”كانت المعجزة بدولار واحد فقط”
توجهت الطفلة ذات السادسة إلى غرفة نومها،	البنت الصغيرة عندها ست سنين راحت أوضتها،
وتناولت حصالة نقودها من مخبئها السري في خزانتها،	وخدت حصالة فلوسها من المكان السري في دولابها،
ثم أفرغتها مما فيها على الأرض،	وفضتها على الأرض،
و أخذت تعد بعناية ما جمعته من نقود خلال الأسابيع الفائتة،	وبدأت تعد الفلوس اللي جمعتها خلال الأسابيع اللي فاتت،
ثم أعادت عدها ثانية فثالثة، ثم همست في سرها :	وعدتهم تاني وتالت، وبعدين همست لنفسها:
“إنها بالتأكيد كافية، و لا مجال لأي خطأ”؛	"أكيد كفاية، مفيش مجال للغلط"؛
وبكل عناية رجعت النقود إلى الحصالة ثم لبست رداءها،	وبكل حرص رجعت الفلوس في الحصالة، ولبست هدومها،
و تسللت من الباب الخلفي،	وخرجت من الباب الخلفي،
متجهة إلى الصيدلية التي لا تبعد كثيرا عن دارها.	رايحة للصيدلية اللي مش بعيدة عن بيتها.
كان الصيدلي مشغولا للغاية، فانتظرته صابرة،	الصيدلي كان مشغول قوي، فاستنته بصبر،
و لكنه استمر منشغلا عنها،	لكن فضل مشغول عنها،
فحاولت لفت نظره دون جدوى ...	حاولت تلفت انتباهه من غير فايدة...
فما كان منها بعد أن يئست	وبعد ما يئست
إلا أن أخرجت قطعة نقود معدنية بقيمة ربع دولار من الحصالة،	طلعت عملة معدنية بقيمة ربع دولار من الحصالة،
فألقتها فوق زجاج الطاولة التي يقف وراءها الصيدلي؛	ورمتها على زجاج الطاولة اللي واقف وراها الصيدلي؛
عندئذ فقط انتبه إليها،	ساعتها بس انتبه لها،
فسألها بصوت عبر فيه عن استيائه :	وسألها بصوت معبر عن استيائه:
ماذا تريدين أيتها الطفلة ؟	عايزة إيه يا بنتي؟
إنني أتكلم مع شقيقي القادم من شيكاغو ،	أنا بتكلم مع أخويا اللي جاي من شيكاغو،
فأجابته بحدة، منزعجة من سلوكه:	فردت عليه بحدة، متضايقة من تصرفه:
شقيقي الصغير مريض جدا و بحاجة لدواء اسمه / معجزة /،	أخويا الصغير عيان قوي و محتاج لدواء اسمه /معجزة/،
و أريد أن أشتري له هذا الدواء.	وعايزة أشتري له الدواء ده.
أجابها الصيدلي بشيء من الدهشة : عفواً، ماذا قلتِ ؟	الصيدلي رد عليها بدهشة: عفواً، قلتِ إيه؟
فاستأنفت كلامها قائلة بكل جدية:	كملت كلامها بجدية:
شقيقي الصغير أندرو،	أخويا الصغير أندرو،
يشكو من مشكلة في غاية السوء،	عنده مشكلة كبيرة قوي،
يقول والدي أن هناك ورما في رأسه،	بابا بيقول إن في ورم في راسه،
لا تنقذه منه سوى معجزة،	اللي حتنقذه منه معجزة،
هل فهمتني ؟؟؟ فكم هو ثمن /معجزة/ ؟	فهمتني؟ كام سعر /معجزة/؟
أرجوك أفدني حالا !	أرجوك قل لي حالاً!
أجابها الصيدلي مغيرا لهجته إلى أسلوب أكثر نعومة :	الصيدلي رد عليها بنعومة أكتر:
أنا آسف، فأنا لا أبيع /معجزة/ في صيدليتي !	أنا آسف، أنا مش ببيع /معجزة/ في صيدليتي!
أجابته الطفلة ملحَّة: إسمعني ِجيداً،	البنت ردت بإصرار: اسمعني كويس،
فأنا معي ما يكفي من النقود لشراء الدواء،	أنا معايا فلوس كفاية لشراء الدواء،
فقط قل لي كم هو الثمن !	بس قل لي سعره كام!
كان شقيق الصيدلي يصغي للحديث،	أخو الصيدلي كان بيسمع الكلام،
فتقدم من الطفلة سائلا: ما هو نوع /معجزة/ التي يحتاجها شقيقك أندرو ؟	قرب من البنت وسألها: إيه نوع /معجزة/ اللي أخوكي أندرو محتاجه؟
أجابته الفتاة بعينين مغرورقتين :	البنت ردت وعيونها مغرقة بالدموع:
لا أدري، و لكن كل ما أعرفه أن شقيقي حقيقة مريض جدا،	معرفش، بس كل اللي أعرفه إن أخويا عيان جداً،
قالت أمي أنه بحاجة إلى عملية جراحية،	ماما قالت إنه محتاج عملية جراحية،
و لكن أبي أجابها، أنه لا يملك نقودا تغطي هذه العملية،	بس بابا قال إنه مش معاه فلوس للعملية،
لذا قررت أن أستخدم نقودي !.	عشان كده قررت أستخدم فلوسي!
سألها شقيق الصيدلي مبدياً اهتمامه : كم لديك من النقود يا صغيرة ؟	أخو الصيدلي سألها باهتمام: معاكِ كام يا صغيرة؟
فأجابته مزهوة : دولار واحد و أحد عشرة سنتا،	البنت ردت بفخر: دولار واحد وأحد عشر سنت،
و يمكنني أن أجمع المزيد إذا احتجت ...!؟	وأقدر أجمع كمان لو احتجت...!؟
أجابها مبتسما : يا لها من مصادفة،	الرجل رد عليها مبتسم: يا لها من صدفة،
دولار و أحد عشر سنتا، هي بالضبط المبلغ المطلوب ثمنا لـ (معجزة) من أجل شقيقك الصغير....!!	دولار وأحد عشر سنت، ده بالضبط المبلغ المطلوب لـ(معجزة) لأخوكي الصغير....!!
ثم تناول منها المبلغ بيد وباليد الأخرى أمسك بيدها الصغيرة،	أخذ منها المبلغ بإيد، وبالإيد التانية مسك إيدها الصغيرة،
طالبا منها أن تقوده إلى دراها ليقابل والديها، وقال لها: أريد رؤية شقيقك أيضا .	وطلب منها تاخده لبيتها عشان يقابل والديها، وقال لها: عايز أشوف أخوكي كمان.
لقد كان ذلك الرجل هو الدكتور كارلتُن أرمسترنغ، جراح الأعصاب .	الراجل ده كان الدكتور كارلتن أرمسترنغ، جراح الأعصاب.
وقد قام الدكتور كارلتن بإجراء العملية للطفل أندرو مجاناً،	والدكتور كارلتن عمل العملية للطفل أندرو مجاناً،
و كانت عملية ناجحة تعافى بعدها أندرو تماما ...	وكانت عملية ناجحة، وأندرو خف تماماً...
بعد بضعة أيام، جلس الوالدان يتحدثان عن تسلسل الأحداث منذ التعرف على الدكتور كارلتون وحتى نجاح العملية و عودة أندرو إلى حالته الطبيعية،	بعد كام يوم، الوالدين كانوا بيتكلموا عن اللي حصل من وقت ما تعرفوا على الدكتور كارلتون لحد نجاح العملية ورجوع أندرو لحالته الطبيعية،
كانا يتحدثان و قد غمرتهما السعادة، و قالت الوالدة في سياق الحديث: ” حقا إنها معجزة ! “	كانوا بيتكلموا وسعداء جداً، والأم قالت في الحديث: "بجد إنها معجزة!"
ثم تساءلت : ” ترى كم كلفت هذه العملية ؟”	وبعدين سألت: "يا ترى العملية دي كلفت كام؟"
رسمت الطفلة على شفتيها ابتسامة عريضة،	البنت رسمت ابتسامة واسعة على شفايفها،
فهي تعلم وحدها أن / معجزة / كلفت بالضبط دولار واحد و أحد عشر سنتا.	لأنها عارفة لوحدها إن /معجزة/ كلفت بالضبط دولار واحد وأحد عشر سنت.
عندما يكون حب الأخرين ... صادقاً ونابعاً من القلب ... عندها ستكون المعجزة ... ولن تكلف الكثير ..	لما يكون حب الآخرين... صادق ومن القلب... ساعتها تكون المعجزة... ومش حتكلف كتير..
Title =”حارس الفنار”	Title =”حارس الفنار”
على شاطئ البحر, كانت الأمواج تتلاطم بشدة, تاركة الزبد الأبيض على حافة الشاطئ.	على شط البحر، الأمواج كانت بتتلاطم بقوة، وسايبة الزبد الأبيض على حافة الشط.
كانت قوة الأمواج كبيرة, لدرجة أنها كانت تعلو وترتفع حتى وصلت إلى سور الفنار.	قوة الأمواج كانت كبيرة لدرجة إنها كانت بتعلى وبتوصل لسور الفنار.
كان الشاطئ خالياً من الناس.	الشط كان فاضي من الناس.
لم يكن هناك سوى الفنار بضوئه الساطع البراق يضئ المكان بالرغم من الأمطار والرعد والبرق.	مكنش فيه غير الفنار بضوءه الساطع اللي بينور المكان بالرغم من المطر والرعد والبرق.
كان عم سعيد, حارس الفنار, مستيقظاً يراقب الشاطئ والبحر.	عم سعيد، حارس الفنار، كان صاحي وبيراقب الشط والبحر.
وكان يبدو عليه القلق الشديد بسبب رؤيته لسفينة تلاطمها الأمواج بضراوة.	وكان باين عليه القلق الشديد عشان شاف سفينة الأمواج كانت بتضربها بقوة.
أخذ عم سعيد يلوح لهم بالكشاف بجانب الضوء الساطع من أعلى الفنار.	عم سعيد بدأ يلوح لهم بالكشاف جنب ضوء الفنار الساطع.
وفي نفس الوقت كان البحارة على متن السفينة ينزلون يربطون الشراع.	في نفس الوقت البحارة على السفينة كانوا بينزلوا يربطوا الشراع.
أما القبطان فقد كان يدير عجلة القيادة متجهاً نحو الشاطئ مسترشدين بالضوء الصادر عن الفنار.	أما القبطان كان بيدير عجلة القيادة متجه للشط مسترشدين بضوء الفنار.
وصلت السفينة بأمان إلى الشاطئ.	السفينة وصلت بأمان للشط.
واستقبل عم سعيد البحارة والقبطان على الشاطئ ورحب بهم وأدخلهم الفنار كي يحميهم من الأمطار والرعد والبرق,	عم سعيد استقبل البحارة والقبطان على الشط ورحب بيهم وأدخلهم الفنار عشان يحميهم من المطر والرعد والبرق،
وقدم لهم الطعام والشاي والقهوة, وزاد من حطب المدفئة كي يعم الدفء المكان, إلى أن تنتهي هذه النوبة الشديدة من العواصف.	وقدم لهم الأكل والشاي والقهوة، وزود حطب المدفأة عشان يعم الدفء في المكان، لحد ما العاصفة تنتهي.
استمر الحال هكذا, الفنار يضئ ويرشد السفن للشاطئ, وعم سعيد يقوم باستقبال البحارة.	الحال فضل كده، الفنار بينور ويرشد السفن للشط، وعم سعيد يستقبل البحارة.
إلى أن قررت البلدة هدم الفنار حتى تقوم ببناء متنزه على الشاطئ.	لحد ما البلدة قررت تهدم الفنار عشان تبني متنزه على الشط.
كانت مفاجأة لعم سعيد حين رأى عمال الهدم والبنائين يقتربون بسيارتهم "والبلدوزر" الذي سيقوم بهدم الفنار.	كانت مفاجأة لعم سعيد لما شاف عمال الهدم والبنائين قربوا بعربياتهم والبلدوزر اللي هيهدم الفنار.
سألهم عم سعيد: لماذا تفعلون ذلك؟ إن الفنار مهم ولا يجب هدمه، لقد أنقذ كثيراً من السفن من الغرق والضياع في عرض البحر، ثم إنه بناء أثري، لماذا تفعلون ذلك؟	عم سعيد سألهم: ليه بتعملوا كده؟ الفنار مهم ولازم ما يتهدمش، أنقذ سفن كتير من الغرق في عرض البحر، وكمان ده بناء أثري، ليه بتعملوا كده؟
وقف عم سعيد يكلمهم ويشرح لهم أهمية الفنار.	عم سعيد وقف يكلمهم ويشرح لهم أهمية الفنار.
ولما لم يجد منهم استجابة, اتجه إلى الفنار, ثم دخل وأوصد الباب من الداخل جيداً ولم يفتح لهم, بالرغم من تهديدهم له بأنهم سيهدمون الفنار وهو بداخله.	ولما ما لقاش منهم استجابة، راح للفنار، ودخل وقفل الباب من جوه كويس وما فتحش لهم، بالرغم من تهديدهم له إنهم هيهدموا الفنار وهو جوه.
ولكن عم سعيد كان يعلم أنهم لن يفعلوا ذلك.	لكن عم سعيد كان عارف إنهم مش هيعملوا كده.
ومرت ثلاثة أيام وعم سعيد لم يفتح باب الفنار, فقطعوا عن الفنار الكهرباء حتى يجبروه على النزول من الفنار كي يهدموه.	عدت تلات أيام وعم سعيد ما فتحش باب الفنار، فقطعوا الكهرباء عن الفنار عشان يجبروا ينزل من الفنار عشان يهدوه.
وفي اليوم الرابع, وعندما حل الظلام, أمطرت السماء. وكان هطول المطر مصحوباً بالرعد والبرق.	في اليوم الرابع، ولما حل الظلام، السماء أمطرت. وكان هطول المطر مصحوب بالرعد والبرق.
تعالت أمواج البحر. وكانت هناك سفينة تلاطمها الأمواج في ظلمة الليل الشديدة.	الأمواج عليت. وكانت فيه سفينة الأمواج بتضربها في ظلمة الليل الشديدة.
في هذا الوقت, كان عم سعيد هو أيضاً جالساً في الظلام بسبب انقطاع الكهرباء.	في الوقت ده، كان عم سعيد قاعد في الظلام بسبب انقطاع الكهرباء.
صعد عم سعيد إلى أعلى الفنار, ونظر إلى المطر وإلى الأمواج المتلاطمة على الشاطئ, ورأى الظلام يعم المكان وتذكر ضوء الفنار الذي كان يضئ المكان.	عم سعيد طلع فوق الفنار، وبص للمطر وللأمواج المتلاطمة على الشط، وشاف الظلام يعم المكان وتذكر ضوء الفنار اللي كان بينور المكان.
وقال لنفسه: كان الله في عون السفن التي في البحر الآن مع هذا المطر وهذه الرياح القوية, لولا انقطاع الكهرباء, لأضاء الفنار لهذه السفن.	وقال لنفسه: كان الله في عون السفن اللي في البحر دلوقتي مع المطر ده والرياح القوية دي، لولا انقطاع الكهرباء، كان الفنار نور للسفن دي.
وبينما هو يحادث نفسه رأى إشارة ضوئية من بعيد.	وبينما هو بيكلم نفسه شاف إشارة ضوئية من بعيد.
اعتقد عم سعيد أنه البرق.	عم سعيد افتكر إنه البرق.
ولكن تكرر الضوء ثلاث مرات, مما أكد شك عم سعيد في أنها إشارة استغاثة من سفينة تواجه مشكلة وأنها لا تري الشاطئ.	لكن الضوء تكرر تلات مرات، مما أكد لعم سعيد إنها إشارة استغاثة من سفينة عندها مشكلة ومش شايفة الشط.
نزل عم سعيد درج الفنار بسرعة, وجلب المصباح الضوئي الذي يملكه, وصعد مرة أخري وأخذ يلوح بالمصباح لعل البحارة يشاهدون الضوء ويسترشدون به للشاطئ.	عم سعيد نزل درج الفنار بسرعة، وجاب المصباح الضوئي اللي معاه، وطلع مرة تانية وبدأ يلوح بالمصباح عشان البحارة يشوفوا الضوء ويسترشدوا بيه للشط.
ظن البحارة أنهم تاهوا وسط هذه العاصفة, كانوا ينتظرون ضوء الفنار كي يرشدهم إلى الشاطئ.	البحارة افتكروا إنهم تاهوا وسط العاصفة دي، كانوا مستنيين ضوء الفنار عشان يرشدهم للشط.
اعتقدوا أنهم لن ينجوا وأنهم هالكين.	افتكروا إنهم مش هينجوا وإنهم هالكين.
وعندما وجدوا الضوء يأتي من جهة الشمال, أداروا عجلة القيادة ناحية الضوء وهم فرحين لأن هناك من رأى إشارة الاستغاثة.	ولما لقوا الضوء جاي من جهة الشمال، أداروا عجلة القيادة ناحية الضوء وهم فرحانين لأن في حد شاف إشارة الاستغاثة.
وعندما وصلوا إلى الشاطئ كان عم سعيد في انتظارهم.	ولما وصلوا للشط كان عم سعيد مستنيهم.
فتح لهم الباب وأدخلهم الفنار وزاد من خشب المدفئة.	فتح لهم الباب ودخلهم الفنار وزود خشب المدفأة.
وبعد قليل عم الدفء المكان, ولكنهم كانوا جالسين في ضوء المصباح وليس نور الكهرباء.	وبعد شوية الدفء عم المكان، لكنهم كانوا قاعدين في ضوء المصباح مش نور الكهرباء.
فسأله القبطان منذ متى والتيار الكهربائي منقطع هنا يا عم سعيد?	القبطان سأله من امتى التيار الكهربائي مقطوع هنا يا عم سعيد؟
فحكي لهم عم سعيد عن قرار البلدية بهدم الفنار, واعتصامه داخله كي لا يسمح لهم بهدمه, وأنهم قاموا بقطع التيار الكهربائي عن الفنار كي يجبروه على الخروج من الفنار.	عم سعيد حكى لهم عن قرار البلدية بهدم الفنار، واعتصامه داخله عشان ما يسمحش لهم بهدمه، وإنهم قطعوا التيار الكهربائي عن الفنار عشان يجبروا يخرج من الفنار.
وفي الصباح, كانت العاصفة قد انتهت, وعاد البحر للهدوء مرة أخري, لكن العمال أيضاً عادوا ومعهم البلدوزر كي يهدموا الفنار.	وفي الصبح، العاصفة كانت انتهت، والبحر رجع للهدوء مرة تانية، لكن العمال كمان رجعوا ومعهم البلدوزر عشان يهدموا الفنار.
خرج لهم عم سعيد والبحارة, ووقفوا أمام الفنار كي يحموه من العمال.	عم سعيد والبحارة خرجوا لهم، ووقفوا قدام الفنار عشان يحموه من العمال.
أما القبطان فقد ذهب إلى حاكم البلدة وأخبره عما حدث لهم بالأمس, وكيف كان ضوء الفنار مهماً له ولغيره من السفن, وأن عم سعيد أنقذهم من الموت غرقاً في البحر بسبب ضوء المصباح الذي رأوه.	أما القبطان راح لحاكم البلدة وأخبره عن اللي حصل لهم امبارح، وإزاي ضوء الفنار كان مهم له ولغيره من السفن، وإن عم سعيد أنقذهم من الموت غرقاً في البحر بسبب ضوء المصباح اللي شافوه.
وأخبره أن مؤن البلدة والمواد الغذائية التي كانت على متن السفينة وصلت لهم سالمة بفضل عم سعيد حارس الفنار.	وقال له إن مؤن البلدة والمواد الغذائية اللي كانت على متن السفينة وصلت لهم سالمة بفضل عم سعيد حارس الفنار.
هنا أصدر حاكم البلدة أمراً بعدم هدم الفنار, بل بتجديده وتزيينه بكشافات كهربائية قوية وحديثة جداً كي تنير الشاطئ وترشد السفن والبحارة.	هنا حاكم البلدة أصدر أمر بعدم هدم الفنار، لكن بتجديده وتزيينه بكشافات كهربائية قوية وحديثة جداً عشان تنور الشط وترشد السفن والبحارة.
عاد القبطان بالقرار وسلمه لمدير العمال, وبشر عم سعيد بالخبر.	القبطان رجع بالقرار وسلمه لمدير العمال، وبشر عم سعيد بالخبر.
هنا هلل الجميع وغنى البحارة أغنية سعيدة ومرحة.	هنا الكل هلل وغنوا البحارة أغنية سعيدة ومرحة.
Title =”قصة النملة الكسولة”	Title =”قصة النملة الكسولة”
كان هناك نملة تعيش في قرية النمل كانت كسولة لا تعمل ولا تأكل لأنها لا تعمل ولا تملك بيتاً.	كان فيه نملة عايشة في قرية النمل، كانت كسولة ما بتشتغلش وما بتاكلش لأنها ما بتشتغلش وما عندهاش بيت.
في يوم من الأيام خرجت النملة من القرية تتمشى في الشوارع حيث كان النمل الآخر يعمل ليحصل على طعام له ولأسرته.	في يوم من الأيام، النملة خرجت من القرية تتمشى في الشوارع، والنمل التاني كان بيشتغل عشان يحصل على أكل ليه ولأسرته.
وكانت النملة في طريقها إلى القرية رأت قطعة سكر، لكنها لم تأكل منها ولم تأخذها معها إلى القرية بل تركتها.	والنملة وهي في طريقها للقرية، شافت قطعة سكر، بس ما كلتش منها وما أخدتهاش معاها للقرية، سابتها.
ثم أمطرت السماء فذابت قطعة السكر.	وبعدين المطر نزل وقطعة السكر دابت.
وذهبت النملة إلى بيت جارتها وقالت لها: هل عندك طعام لأتناوله وأسكن معكِ حتى تظهر الشمس؟	والنملة راحت لبيت جارتها، وقالت لها: عندك أكل عشان آكله وأسكن معاكي لحد ما الشمس تطلع؟
قالت الجارة: لقد جمعت طعام يكفيني وأسرتي فقط، والبيت صغير.	الجارة قالت: أنا جمعت أكل يكفيني أنا وأسرتي بس، والبيت صغير.
وذهبت لجارتها الأخرى وقالت نفس الكلام.	وراحت لجارتها التانية، قالت نفس الكلام.
جلست النملة وحيدة في الخارج والسماء تمطر، بكت النملة وقالت: لن أكون كسولة ثانية.	النملة قعدت لوحدها بره والدنيا بتمطر، النملة عيطت وقالت: مش هكون كسولة تاني.
ماذا تعلمت من القصة؟	إيه اللي اتعلمته من القصة؟
