# Supplementary material
Source: ML conference proceedings conference paper supplement (https://aclanthology.org/2025.wacl-1.11)
Supplement: OptionalSupplementaryMaterial [file Sample of translated_sentences_with_arat5-finetuned-cai-to-msa (1).xlsx]

Advancing-Arabic-Dialect-Translation-Quality-A-Semantic-Similarity-Approach-Using-LLM/translated\_sentences\_with\_arat5-finetuned-cai-to-msa (1).xlsx at main · alaabouomar/Advancing-Arabic-Dialect-Translation-Quality-A-Semantic-Similarity-Approach-Using-LLM


Skip to content


## Navigation Menu

# Global navigation

- Home
- Issues
- Pull requests
- Projects
- Discussions
- Codespaces
- Explore
- Marketplace

Loading

© 2024 GitHub, Inc.

About
Blog
Terms
Privacy
Security
Status


alaabouomar
 /
**Advancing-Arabic-Dialect-Translation-Quality-A-Semantic-Similarity-Approach-Using-LLM**


# Navigate back to

- alaabouomar
- Advancing-Arabic-Dialect-Translation-Quality-A-Semantic-Similarity-Approach-Using-LLM

- alaabouomar
  /
- Advancing-Arabic-Dialect-Translation-Quality-A-Semantic-Similarity-Approach-Using-LLM

Type `/` to search

# Search code, repositories, users, issues, pull requests...

Search

Clear

Search syntax tips
 
Give feedback

# Provide feedback

We read every piece of feedback, and take your input very seriously.


Include my email address so I can be contacted

Cancel
 Submit feedback


# Saved searches

## Use saved searches to filter your results more quickly

Name

Query

To see all available qualifiers, see our documentation.

Cancel
 Create saved search

Create new...

 


Issues
 


Pull requests

 

Notifications

- Code
- Issues
  0
- Pull requests
  0
- Actions
- Projects
  0
- Wiki
- Security
- Insights
- Settings

Additional navigation options


- Code
- Issues
- Pull requests
- Actions
- Projects
- Wiki
- Security
- Insights
- Settings

You signed in with another tab or window. Reload to refresh your session.
You signed out in another tab or window. Reload to refresh your session.
You switched accounts on another tab or window. Reload to refresh your session.
 


Dismiss alert

{{ message }}

Open in github.dev
Open in a new github.dev tab
Open in codespace


## Files

## Files

main

`t`

- ARAT5-FineTuned.ipynb
- CAIRO\_TRAINING\_SET\_Updated.xlsx
- Cairo-MSA Children's Corpus.xlsx
- translated\_sentences\_with\_arat5-finetuned-cai-to-msa (1).xlsx

## Breadcrumbs

1. Advancing-Arabic-Dialect-Translation-Quality-A-Semantic-Similarity-Approach-Using-LLM

/

# translated\_sentences\_with\_arat5-finetuned-cai-to-msa (1).xlsx

## Latest commit

## History

History

56.8 KB

Code 55% faster with GitHub Copilot

## Breadcrumbs

1. Advancing-Arabic-Dialect-Translation-Quality-A-Semantic-Similarity-Approach-Using-LLM

/

# translated\_sentences\_with\_arat5-finetuned-cai-to-msa (1).xlsx

Top

## File metadata and controls

- Code
- Blame

56.8 KB

Code 55% faster with GitHub Copilot

Raw

View raw

## Footer

© 2024 GitHub, Inc.

### Footer navigation

- Terms
- Privacy
- Security
- Status
- Docs
- Contact
- Manage cookies
- Do not share my personal information


You can’t perform that action at this time.
